# Supplementary material for: Profiling tear proteomes of patients with unilateral relapsed Behcet’s disease-associated uveitis using data-independent acquisition proteomics
Source: PeerJ. 2020 Jun 19;8:e9250. doi: 10.7717/peerj.9250 (PMC7307566; doi:10.7717/peerj.9250)
Supplement: Supplemental Information 1 — Table S1 shows the optimal acquisition windows. Table S2 shows the proteins with CV below 30%. Table S3 shows all the 1797 detected proteins. Table S4 shows the 51 proteins differentially expressed between the uveitis and the contralateral quiescent eyes. [file peerj-08-9250-s001.xlsx]

## Sheet: Table S1
Middle mass	Width
402	104
472.5	37
507.5	33
538	28
563.5	23
586.5	23
609.5	23
631.5	21
653	22
675.5	23
700.5	27
725.5	23
748.5	23
773	26
800	28
827.5	27
854.5	27
883	30
916.5	37
952.5	35
989.5	39
1029	40
1088	78
1211.5	169
1398	204

## Sheet: Table S2
PG.ProteinAccessions	PG.ProteinDescriptions	[1] Tear_QC_1.raw.PG.Quantity	[2] Tear_QC_2.raw.PG.Quantity	[2] Tear_QC_3.raw.PG.Quantity	STDV	Mean	CV value
A0AVT1	Ubiquitin-like modifier-activating enzyme 6	14197.8	23307	24787.9	4682.39	20764.2	0.225503				19327.7	24081.9
A0MZ66	Shootin-1	19840.7	30811.8	2658.81	11586.3	17770.4	0.651997				9390.13	14210.3
A2VCL2	Coiled-coil domain-containing protein 162	65173.6	36195.2	69768.9	14862.6	57045.9	0.260537				73163.1	70854.2
B9A064	Immunoglobulin lambda-like polypeptide 5	231956	139921	5.95543e+06	2.72002e+06	2.1091e+06	1.28966				230641	275868
O00151	PDZ and LIM domain protein 1	164108	180416	185844	9236.79	176789	0.0522475
O00170	AH receptor-interacting protein	22057.1	14190.4	17771.8	3215.87	18006.4	0.178595
O00182	Galectin-9	28682.6	29982	24346.3	2409.54	27670.3	0.0870805
O00194	Ras-related protein Rab-27B	7369.49	16417.2	10881.3	3724.38	11556	0.32229				12216.8	8069.01
O00231	26S proteasome non-ATPase regulatory subunit 11	23289.8	21548.1	32890	4987.05	25909.3	0.192481
O00232	26S proteasome non-ATPase regulatory subunit 12	30772.1	19620.4	27319.4	4661.39	25904	0.179949
O00233	26S proteasome non-ATPase regulatory subunit 9	15496.5	15341.8	15533.7	83.1254	15457.4	0.00537773
O00244	Copper transport protein ATOX1	3365.95	10422.9	Filtered	3528.47	6894.42	0.511786				Filtered	Filtered
O00273	DNA fragmentation factor subunit alpha	12379.7	7424.56	4875.11	3115.78	8226.47	0.378751				5933.69	9204.61
O00299	Chloride intracellular channel protein 1	851738	810226	825071	17175.2	829012	0.0207176
O00303	Eukaryotic translation initiation factor 3 subunit F	27053.8	12273.3	21581.2	6101.46	20302.8	0.300523				26656.3	22457.8
O00391	Sulfhydryl oxidase 1	85017.9	81561.3	87390.7	2393.55	84656.6	0.0282736
O00442	RNA 3'-terminal phosphate cyclase	6979.21	5940.81	6689.85	437.553	6536.62	0.0669386
O00462	Beta-mannosidase	17795.5	13028.2	16993	2084.09	15938.9	0.130755
O00487	26S proteasome non-ATPase regulatory subunit 14	56283.2	30576	43472.9	10494.9	43444	0.241574				50464.6	34346.7
O00534	von Willebrand factor A domain-containing protein 5A	61557.7	62601.2	67578.6	2627.1	63912.5	0.0411046
O00560	Syntenin-1	15548	15303.1	22538.4	3354.51	17796.5	0.188492
O00571	ATP-dependent RNA helicase DDX3X	15851.4	17367.3	16490.3	621.38	16569.7	0.0375011
O00584	Ribonuclease T2	126783	140231	129978	5736.92	132331	0.0433529
O00592	Podocalyxin	61214.5	48555.3	53085.5	5237.26	54285.1	0.0964769
O00629	Importin subunit alpha-4	19355.9	Filtered	7872.44	5741.7	13614.1	0.421745				11925.5	Filtered
O00743	Serine/threonine-protein phosphatase 6 catalytic subunit	Filtered	7561.85	12038.1	2238.11	9799.96	0.22838				16075.3	18758.2
O00757	Fructose-1,6-bisphosphatase isozyme 2	411321	455868	406701	22168.6	424630	0.052207
O00764	Pyridoxal kinase	44749.8	36637.7	66358.8	12543.7	49248.8	0.254701				47601.1	49851.8
O14561	Acyl carrier protein, mitochondrial	8317.42	7065.9	8042.21	536.988	7808.51	0.0687695
O14579	Coatomer subunit epsilon	21872.3	12512	24928.7	5282.36	19771	0.267177				28997.1	15088.6
O14638	Ectonucleotide pyrophosphatase/phosphodiesterase family member 3	7066.25	12326.7	10530.7	2183.27	9974.56	0.218884				12071.7	14164.4
O14737	Programmed cell death protein 5	19517	26217.2	30025.4	4343.86	25253.2	0.172012
O14744	Protein arginine N-methyltransferase 5	9946.25	Filtered	12232.9	1143.33	11089.6	0.1031
O14745	Na(+)/H(+) exchange regulatory cofactor NHE-RF1	100785	100284	109984	4459.28	103684	0.0430083
O14773	Tripeptidyl-peptidase 1	43379.3	33292.7	34893.1	4426.13	37188.4	0.119019
O14818	Proteasome subunit alpha type-7	199560	216621	198816	8223.91	204999	0.0401168
O14907	Tax1-binding protein 3	9747.02	14388.6	13055.1	1951.25	12396.9	0.157398
O14908	PDZ domain-containing protein GIPC1	22412.9	15895.1	20403	2725.28	19570.3	0.139256
O14933	Ubiquitin/ISG15-conjugating enzyme E2 L6	81329.5	24137.3	29005.9	25889.5	44824.2	0.577579				26945.8	21031
O14950;P19105	Myosin regulatory light chain 12B;Myosin regulatory light chain 12A	380558	397225	377712	8606.71	385165	0.0223455
O14980	Exportin-1	13828.5	13818.3	11557.9	1067.95	13068.3	0.0817213
O15020	Spectrin beta chain, non-erythrocytic 2	10372.5	31658.2	19503	8719.06	20511.2	0.425087				6702	Filtered
O15067	Phosphoribosylformylglycinamidine synthase	8409.76	7120.12	7259.02	577.991	7596.3	0.0760884
O15143	Actin-related protein 2/3 complex subunit 1B	32437.3	35954.5	29950.1	2463.3	32780.6	0.0751449
O15144	Actin-related protein 2/3 complex subunit 2	139809	124149	141897	7920.49	135285	0.0585467
O15145	Actin-related protein 2/3 complex subunit 3	295940	148172	382607	96785.1	275573	0.351214				769306	365191
O15212	Prefoldin subunit 6	46305.6	37719.1	48266.9	4580.52	44097.2	0.103873
O15231	Zinc finger protein 185	25561.8	14499	28191.1	5932.7	22750.6	0.260771				43399.6	13329.4
O15264	Mitogen-activated protein kinase 13	60153.6	73058.1	54482.7	7772.67	62564.8	0.124234
O15305	Phosphomannomutase 2	16804.2	10320.3	22753.9	5077.58	16626.1	0.305398				27362.8	24935.9
O15372	Eukaryotic translation initiation factor 3 subunit H	17080.3	9806.53	11127.8	3163.76	12671.5	0.249674				9981.22	7822.55
O15511	Actin-related protein 2/3 complex subunit 5	237137	240064	241095	1676.29	239432	0.00700112
O43175	D-3-phosphoglycerate dehydrogenase	137384	124390	120452	7234.3	127409	0.0567804
O43237	Cytoplasmic dynein 1 light intermediate chain 2	8007.91	9720.87	4695.96	2085.74	7474.92	0.279032				5149.61	Filtered
O43242	26S proteasome non-ATPase regulatory subunit 3	26325.8	23742.8	26180.6	1184.87	25416.4	0.0466184
O43396	Thioredoxin-like protein 1	59151	69877.5	92282.8	13803.3	73770.4	0.187111
O43399	Tumor protein D54	19577.5	17677.5	15536	1650.92	17597	0.0938183
O43488	Aflatoxin B1 aldehyde reductase member 2	61029.4	76672.5	38561.2	15641.8	58754.4	0.266224				65100.2	57508
O43490	Prominin-1	25647.2	8710.45	24156.1	7656.85	19504.6	0.392566				15314.1	23659.6
O43505	N-acetyllactosaminide beta-1,3-N-acetylglucosaminyltransferase	9685.12	7743.75	7122.98	1091.32	8183.95	0.133349
O43653	Prostate stem cell antigen	23538.8	65489.4	59399.9	18508.1	49476	0.374082				62145.3	60840.9
O43707	Alpha-actinin-4	1.02241e+06	1.03373e+06	830061	93455.9	962066	0.0971409
O43708	Maleylacetoacetate isomerase	15361.6	16703	13955.9	1121.57	15340.2	0.0731132
O43747	AP-1 complex subunit gamma-1	11341.7	17595.3	10318.4	3216.4	13085.1	0.245806				13870.3	12304.4
O43768	Alpha-endosulfine	32940.1	43155.5	34228.4	4542.49	36774.6	0.123522
O43776	Asparagine--tRNA ligase, cytoplasmic	124310	109175	88355.1	14739.5	107280	0.137393
O43813	LanC-like protein 1	43073.3	36216	40019.6	2805.08	39769.6	0.0705332
O43847	Nardilysin	5424.24	6036.65	6151.1	319.109	5870.66	0.0543566
O43852	Calumenin	181713	196797	189739	6162.17	189416	0.0325324
O43866	CD5 antigen-like	30635.7	16133.7	25875.3	6035.72	24214.9	0.249256				13099.4	30405.5
O60256	Phosphoribosyl pyrophosphate synthase-associated protein 2	11936.5	14167.2	11620.7	1133.36	12574.8	0.0901292
O60437	Periplakin	25113.6	34550.1	33147.8	4157.49	30937.2	0.134385
O60506	Heterogeneous nuclear ribonucleoprotein Q	10316.6	9189.72	11134.7	797.369	10213.7	0.0780686
O60547	GDP-mannose 4,6 dehydratase	246748	238440	200738	20020.4	228642	0.0875621
O60610	Protein diaphanous homolog 1	131862	139899	111854	11792	127872	0.0922174
O60664	Perilipin-3	169566	155951	156995	6186.61	160837	0.038465
O60701	UDP-glucose 6-dehydrogenase	14596.6	25456.4	18639.3	4481.49	19564.1	0.229067				18687.6	38612.9
O60716	Catenin delta-1	16591.6	8457.14	32757.7	10099.7	19268.8	0.524145				14842.9	7922.95
O60749	Sorting nexin-2	38281.9	42698.6	54214.2	6716.12	45064.9	0.149032
O60784	Target of Myb protein 1	33239.4	41156.7	46423.1	5418.37	40273	0.134541
O60814;P06899;P23527;P33778;P57053;P58876;P62807;Q16778;Q5QNW6;Q8N257;Q93079;Q99877;Q99879;Q99880	Histone H2B type 1-K;Histone H2B type 1-J;Histone H2B type 1-O;Histone H2B type 1-B;Histone H2B type F-S;Histone H2B type 1-D;Histone H2B type 1-C/E/F/G/I;Histone H2B type 2-E;Histone H2B type 2-F;Histone H2B type 3-B;Histone H2B type 1-H;Histone H2B type 1-N;Histone H2B type 1-M;Histone H2B type 1-L	151206	107745	109181	20158.1	122711	0.164273
O60884	DnaJ homolog subfamily A member 2	12537.1	8026.88	14618.1	2751.08	11727.3	0.234587				8268.87	9164.16
O60888	Protein CutA	233936	171897	147962	36229.4	184598	0.196261
O75083	WD repeat-containing protein 1	333683	308014	302331	13638.6	314676	0.0433418
O75084;Q14332	Frizzled-7;Frizzled-2	40032.5	37899.4	36767.6	1353.64	38233.2	0.0354047
O75131	Copine-3	15698.1	17352.6	11090.8	2649.42	14713.8	0.180063
O75223	Gamma-glutamylcyclotransferase	55209	39173.8	37319.5	8031.88	43900.7	0.182955
O75347	Tubulin-specific chaperone A	37982.9	38648.6	44122.6	2750.84	40251.4	0.0683416
O75348	V-type proton ATPase subunit G 1	34035.5	35027.5	36856.4	1168.38	35306.5	0.0330924
O75351	Vacuolar protein sorting-associated protein 4B	64349.6	92627.5	67257.7	12700.5	74744.9	0.169918
O75363	Breast carcinoma-amplified sequence 1	31036.2	35740.2	36352.8	2375.07	34376.4	0.0690902
O75367	Core histone macro-H2A.1	34745.4	34943.7	31111.7	1761.54	33600.3	0.0524265
O75368	SH3 domain-binding glutamic acid-rich-like protein	92535.6	81715.8	113219	13069.7	95823.6	0.136393
O75369	Filamin-B	10491.5	15075.1	11510.3	1965.12	12359	0.159003
O75390	Citrate synthase, mitochondrial	30343.6	19176.7	18696.7	5380.84	22739	0.236635				57099.3	37752.8
O75396	Vesicle-trafficking protein SEC22b	19499.9	20487.1	34477.6	6839.74	24821.5	0.275557				12895.9	17343
O75436	Vacuolar protein sorting-associated protein 26A	24348.2	23517.5	26906.4	1442.17	24924	0.0578628
O75556	Mammaglobin-B	55913812	63470664	56518340	3.42874e+06	58634272	0.0584767
O75608	Acyl-protein thioesterase 1	75290.9	85331.7	72929.7	5376.92	77850.8	0.0690671
O75663	TIP41-like protein	7320.46	12109.5	9528.07	1957.09	9652.67	0.202752				9473.13	9208.36
O75787	Renin receptor	16461	15400.4	10383.7	2650.5	14081.7	0.188223
O75821	Eukaryotic translation initiation factor 3 subunit G	Filtered	9289.81	26329.5	8519.84	17809.7	0.478383				9954.93	6847.34
O75828	Carbonyl reductase [NADPH] 3	365076	294429	471507	72782.2	377004	0.193054
O75874	Isocitrate dehydrogenase [NADP] cytoplasmic	530907	545150	494657	21256.5	523571	0.0405991
O75882	Attractin	16247.8	16368.1	18325.2	952.224	16980.4	0.0560779
O75884	Putative hydrolase RBBP9	Filtered	602689	10117.8	296286	306403	0.966979				5319.39	432183
O75891	Cytosolic 10-formyltetrahydrofolate dehydrogenase	278071	368552	287528	40607.6	311384	0.13041
O75936	Gamma-butyrobetaine dioxygenase	30024.5	21735.4	45067.5	9657.4	32275.8	0.299215				48452	62603.7
O75976	Carboxypeptidase D	10642.3	9881.43	8879.17	722.059	9800.98	0.0736721
O76003	Glutaredoxin-3	114786	82182.5	98488.7	13310.3	98485.7	0.13515
O94760	N(G),N(G)-dimethylarginine dimethylaminohydrolase 1	13455.3	17111	14958.4	1500.25	15174.9	0.0988639
O94973	AP-2 complex subunit alpha-2	18349.4	13750.5	11910.5	2707.93	14670.1	0.184588
O94979	Protein transport protein Sec31A	46528.9	50590.5	47043.4	1805.65	48054.3	0.0375752
O95084	Serine protease 23	Filtered	Filtered	Filtered	#DIV/0!	#DIV/0!	#DIV/0!				Filtered	6281.38
O95171	Sciellin	24312.6	25319.5	19140.8	2706.73	22924.3	0.118073
O95274	Ly6/PLAUR domain-containing protein 3	Filtered	Filtered	24763.3	0	24763.3	0
O95294	RasGAP-activating-like protein 1	7458.65	5930.26	9553.58	1485.23	7647.5	0.194211
O95336	6-phosphogluconolactonase	218237	210351	199650	7616.86	209412	0.0363725
O95352	Ubiquitin-like modifier-activating enzyme ATG7	6181.32	5295.84	4567.04	660.062	5348.07	0.123421
O95361	Tripartite motif-containing protein 16	28157	29361.9	24912.6	1878.97	27477.2	0.0683831
O95372	Acyl-protein thioesterase 2	35285.4	25550.4	20307.4	6205.75	27047.8	0.229437				26464	26703
O95433	Activator of 90 kDa heat shock protein ATPase homolog 1	51759	53929.7	55927	1702.07	53871.9	0.0315948
O95436	Sodium-dependent phosphate transport protein 2B	9178.76	19106.2	21351.6	5289.12	16545.5	0.319671				Filtered	11629.9
O95445	Apolipoprotein M	12646.3	Filtered	13142.3	248.033	12894.3	0.0192359
O95479	GDH/6PGL endoplasmic bifunctional protein	12517.1	9717.16	11443.6	1153.37	11225.9	0.102741
O95571	Protein ETHE1, mitochondrial	75892.5	77142.2	65396.1	5267.39	72810.3	0.072344
O95671	N-acetylserotonin O-methyltransferase-like protein	8137.87	17801.7	6834.27	4891.89	10924.6	0.447785				5949.56	6980.6
O95747	Serine/threonine-protein kinase OSR1	42453.3	22481.5	28558.9	8359.04	31164.6	0.268223				55515.4	36135.5
O95782	AP-2 complex subunit alpha-1	20208.5	20984.5	19278.2	697.543	20157.1	0.0346053
O95793	Double-stranded RNA-binding protein Staufen homolog 1	24732.3	17402.1	14184.4	4413.93	18772.9	0.235122				19272.5	20744.3
O95833	Chloride intracellular channel protein 3	26445.3	46120.9	45722.1	9182.61	39429.4	0.232887				69755.6	Filtered
O95834	Echinoderm microtubule-associated protein-like 2	151239	141108	135527	6503.63	142625	0.0455997
O95861	3'(2'),5'-bisphosphate nucleotidase 1	17673.7	344673	16805.8	154354	126384	1.22131				16238.4	20310.6
O95865	N(G),N(G)-dimethylarginine dimethylaminohydrolase 2	47591.1	54962.6	43174.1	4862.78	48575.9	0.100107
O95965	Integrin beta-like protein 1	Filtered	Filtered	Filtered	#DIV/0!	#DIV/0!	#DIV/0!				Filtered	9297.79
O95968	Secretoglobin family 1D member 1	23877896	21800798	23734326	947129	2.31377e+07	0.0409345
O95994	Anterior gradient protein 2 homolog	1.55516e+06	1.45859e+06	1.74971e+06	121071	1.58782e+06	0.0762499
P00326	Alcohol dehydrogenase 1C	1.00232e+06	1.03804e+06	1.0089e+06	15521.5	1.01642e+06	0.0152708
P00338	L-lactate dehydrogenase A chain	2.18535e+06	2.05372e+06	1929792	104348	2.05629e+06	0.0507459
P00352	Retinal dehydrogenase 1	2.89048e+06	3.12969e+06	2.90085e+06	110401	2.97368e+06	0.037126
P00367	Glutamate dehydrogenase 1, mitochondrial	22861.8	24737.5	23868.5	766.439	23822.6	0.0321727
P00390	Glutathione reductase, mitochondrial	201845	222348	206663	8753.24	210286	0.0416255
P00441	Superoxide dismutase [Cu-Zn]	296941	303849	300045	2825.04	300278	0.00940806
P00450	Ceruloplasmin	1.12936e+06	1.22467e+06	1.23853e+06	48527.8	1.19752e+06	0.0405236
P00491	Purine nucleoside phosphorylase	38210.7	43627	50266.3	4930.11	44034.7	0.11196
P00492	Hypoxanthine-guanine phosphoribosyltransferase	19275.1	20573.5	21490.1	908.71	20446.2	0.0444438
P00505	Aspartate aminotransferase, mitochondrial	4285.17	Filtered	5511.51	613.167	4898.34	0.125179
P00558	Phosphoglycerate kinase 1	1.35596e+06	1.52958e+06	1.38613e+06	75745.2	1.42389e+06	0.053196
P00568	Adenylate kinase isoenzyme 1	45125.3	38388	41521.3	2752.71	41678.2	0.0660468
P00734	Prothrombin	228514	214695	209165	8137.38	217458	0.0374204
P00736	Complement C1r subcomponent	24763.4	24360.4	51783	12833.2	33635.6	0.381536				4087.21	51679.7
P00738	Haptoglobin	4233517	3.99256e+06	4275994	124810	4.16736e+06	0.0299494
P00739	Haptoglobin-related protein	9859.04	Filtered	6625.63	1616.71	8242.33	0.196147
P00746	Complement factor D	68435.3	79686.8	142967	32805.8	97029.7	0.3381				39805.6	60461.4
P00747	Plasminogen	208932	219345	224557	6495.72	217611	0.0298501
P00748	Coagulation factor XII	17158.2	18306.9	13972.2	1833.64	16479.1	0.111271
P00751	Complement factor B	351288	332412	347250	8115.39	343650	0.0236153
P00966	Argininosuccinate synthase	667581	673314	563376	50528.4	634757	0.0796028
P01008	Antithrombin-III	148566	160544	160654	5672.59	156588	0.0362262
P01009	Alpha-1-antitrypsin	2.41573e+06	2.49588e+06	2247107	103680	2386240	0.0434492
P01011	Alpha-1-antichymotrypsin	1.69693e+06	1.91531e+06	1872552	94493.4	1.82826e+06	0.0516848
P01019	Angiotensinogen	54860.9	55984.5	72910.2	8256.45	61251.9	0.134795
P01023	Alpha-2-macroglobulin	1299986	1.23809e+06	1.26521e+06	25334.5	1.26776e+06	0.0199836
P01024	Complement C3	1.54933e+06	1.61019e+06	1.5145e+06	39541.2	1.55801e+06	0.0253794
P01031	Complement C5	22540	19973.2	30145.8	4319.42	24219.6	0.178344
P01033	Metalloproteinase inhibitor 1	221741	213563	224198	4546.58	219834	0.0206819
P01034	Cystatin-C	846618	816922	877804	24857.6	847115	0.0293439
P01036	Cystatin-S	27702326	28868946	21571628	3.20065e+06	2.60476e+07	0.122877
P01037	Cystatin-SN	2.84362e+06	2.47247e+06	2506914	167434	2.60767e+06	0.0642084
P01042	Kininogen-1	466994	519001	464242	25190.1	483412	0.0521089
P01591	Immunoglobulin J chain	27870932	27143108	26618636	513490	27210892	0.0188707
P01598	Ig kappa chain V-I region EU	1.1137e+06	1.09821e+06	1.10496e+06	6340.97	1.10562e+06	0.00573521
P01603	Ig kappa chain V-I region Ka	14437.5	32778.7	19909	7688.11	22375.1	0.343602				22849.5	25974.3
P01605	Ig kappa chain V-I region Lay	1.59349e+06	1.17698e+06	1.08922e+06	219965	1286562	0.170971
P01608	Ig kappa chain V-I region Roy	1828400	1.86649e+06	2.01448e+06	80260.1	1.90312e+06	0.0421728
P01609	Ig kappa chain V-I region Scw	111987	85293.4	109824	12106	102368	0.118259
P01610	Ig kappa chain V-I region WEA	106530	94609.1	133879	16439	111673	0.147207
P01611	Ig kappa chain V-I region Wes	313832	327804	192636	60694.2	278091	0.218253				167914	162829
P01612	Ig kappa chain V-I region Mev	125833	119801	35704.1	41139.1	93779.3	0.43868				55212.7	107791
P01613	Ig kappa chain V-I region Ni	1.88483e+06	1.84003e+06	352847	711860	1.35924e+06	0.52372				1.83651e+06	1.95366e+06
P01614	Ig kappa chain V-II region Cum	15708.9	12984.9	13773.7	1144.43	14155.8	0.0808447
P01615	Ig kappa chain V-II region FR	56122.4	60908.2	60725.2	2214.17	59252	0.0373687
P01616	Ig kappa chain V-II region MIL	168390	183810	192854	10099.6	181685	0.0555886
P01617	Ig kappa chain V-II region TEW	2763342	2.59638e+06	2848624	104764	2.73611e+06	0.0382893
P01619	Ig kappa chain V-III region B6	21760.9	22591.5	21645.5	421.382	21999.3	0.0191543
P01620	Ig kappa chain V-III region SIE	3.53597e+06	2.23326e+06	3.46101e+06	597223	3.07675e+06	0.194109
P01621	Ig kappa chain V-III region NG9 (Fragment)	335511	328661	536125	96225.6	400099	0.240504				224944	226545
P01622	Ig kappa chain V-III region Ti	201130	207553	168501	17097.5	192395	0.0888668
P01624	Ig kappa chain V-III region POM	88061.7	65578.1	152556	36863.2	102065	0.361173				105347	91577.8
P01625	Ig kappa chain V-IV region Len	571872	519906	567855	23607.4	553211	0.0426734
P01700;P04208	Ig lambda chain V-I region HA;Ig lambda chain V-I region WAH	3585097	3.80909e+06	3642878	94951.1	3.67902e+06	0.0258088
P01701	Ig lambda chain V-I region NEW	95485.4	93570.7	81895.2	6006.25	90317.1	0.0665018
P01702;P06316	Ig lambda chain V-I region NIG-64;Ig lambda chain V-I region BL2	241898	480146	467850	109528	396631	0.276147				406246	429250
P01703	Ig lambda chain V-I region NEWM	3.85517e+06	3.96988e+06	3.74104e+06	93422	3.85536e+06	0.0242317
P01714	Ig lambda chain V-III region SH	1.44193e+06	1.07427e+06	967591	203185	1.16127e+06	0.174969
P01717	Ig lambda chain V-IV region Hil	3.10791e+06	420587	3.17137e+06	1.28204e+06	2.23329e+06	0.574057				3.03313e+06	1907923
P01719	Ig lambda chain V-V region DEL	4472.53	5492.23	4611.63	451.491	4858.79	0.0929223
P01742;P01761;P06326	Ig heavy chain V-I region EU;Ig heavy chain V-I region SIE;Ig heavy chain V-I region Mot	303223	382900	281056	43731.4	322393	0.135646
P01743	Ig heavy chain V-I region HG3	744361	709381	686429	23819.9	713390	0.0333897
P01762	Ig heavy chain V-III region TRO	Filtered	20781.4	31867.8	5543.22	26324.6	0.210572				8081.41	16539.1
P01763	Ig heavy chain V-III region WEA	3.22917e+06	2.56338e+06	612024	1.11058e+06	2.13486e+06	0.520213				827206	2.45652e+06
P01764	Ig heavy chain V-III region VH26	1.45599e+06	1.37838e+06	1.43677e+06	33001.6	1.42371e+06	0.02318
P01766	Ig heavy chain V-III region BRO	6826648	5.64232e+06	5.93051e+06	504288	6133158	0.0822232
P01767	Ig heavy chain V-III region BUT	166914	173647	138447	15256.3	159669	0.0955494
P01771	Ig heavy chain V-III region HIL	417005	495977	409378	39149.4	440787	0.0888172
P01772	Ig heavy chain V-III region KOL	7828474	7.98854e+06	6.64464e+06	599365	7.48722e+06	0.0800517
P01773	Ig heavy chain V-III region BUR	298294	118115	299568	85239.3	238659	0.357159				263458	116215
P01776	Ig heavy chain V-III region WAS	2.92564e+06	3.09792e+06	3.10924e+06	84007.2	3.04427e+06	0.0275952
P01778	Ig heavy chain V-III region ZAP	51986	64554.4	53981.4	5514.97	56840.6	0.0970251
P01779	Ig heavy chain V-III region TUR	257026	223226	165952	37590.4	215402	0.174513
P01780	Ig heavy chain V-III region JON	250510	277354	230393	19237.1	252752	0.0761104
P01781	Ig heavy chain V-III region GAL	671341	706516	663009	18855.2	680289	0.0277164
P01824	Ig heavy chain V-II region WAH	153165	169535	285720	59008.4	202807	0.290959				287195	264513
P01833	Polymeric immunoglobulin receptor	44922868	45609864	47093440	905805	4.58754e+07	0.0197449
P01834	Ig kappa chain C region	19519990	19304342	18752974	322976	1.91924e+07	0.0168283
P01857	Ig gamma-1 chain C region	4751063	4.70805e+06	5.14945e+06	198717	4869521	0.0408083
P01859	Ig gamma-2 chain C region	1.40999e+06	1.28594e+06	1609777	133404	1.43524e+06	0.0929491
P01860	Ig gamma-3 chain C region	154704	134714	164778	12494.3	151399	0.0825257
P01861	Ig gamma-4 chain C region	421442	505419	431209	37497.7	452690	0.0828331
P01871	Ig mu chain C region	5.91426e+06	6104577	5.98055e+06	78878.6	5999796	0.0131469
P01876	Ig alpha-1 chain C region	78436584	88576472	81457632	4.25078e+06	8.28236e+07	0.0513233
P01877	Ig alpha-2 chain C region	192382528	198371024	184708784	5.59171e+06	1.91821e+08	0.0291507
P01893;P30499;Q29865;Q29963	Putative HLA class I histocompatibility antigen, alpha chain H;HLA class I histocompatibility antigen, Cw-1 alpha chain;HLA class I histocompatibility antigen, Cw-18 alpha chain;HLA class I histocompatibility antigen, Cw-6 alpha chain	82872.7	Filtered	2595.74	40138.5	42734.2	0.939258				5453.03	8459.36
P02144	Myoglobin	74262.9	80445.9	67607.5	5242.46	74105.4	0.0707432
P02511	Alpha-crystallin B chain	120025	100066	135640	14559.3	118577	0.122783
P02538;P48668	Keratin, type II cytoskeletal 6A;Keratin, type II cytoskeletal 6C	37086.4	39955.7	28457.3	4886.59	35166.5	0.138956
P02545	Prelamin-A/C	180059	213232	181312	15350.9	191534	0.0801469
P02647	Apolipoprotein A-I	3.63055e+06	3.4911e+06	3.52286e+06	59673.9	3.54817e+06	0.0168182
P02649	Apolipoprotein E	25703.7	25173.7	29862.9	2096.81	26913.4	0.0779095
P02652	Apolipoprotein A-II	263861	386733	242097	63675.1	297564	0.213988				511307	441931
P02654	Apolipoprotein C-I	Filtered	17955.1	Filtered	0	17955.1	0
P02656	Apolipoprotein C-III	128582	136174	127722	3797.85	130826	0.0290298
P02671	Fibrinogen alpha chain	481825	454043	448362	14621	461410	0.0316876
P02675	Fibrinogen beta chain	480025	443293	413197	27327.1	445505	0.0613396
P02679	Fibrinogen gamma chain	719290	675399	646733	29837.8	680474	0.0438485
P02741	C-reactive protein	13729.7	18078.9	20718.8	2881.59	17509.1	0.164577
P02745	Complement C1q subcomponent subunit A	Filtered	33506.5	30141.7	1682.41	31824.1	0.0528658
P02746	Complement C1q subcomponent subunit B	37957.1	41088.5	38406.3	1382.48	39150.6	0.0353119
P02747	Complement C1q subcomponent subunit C	147320	246452	181892	41083.3	191888	0.214101				131906	131473
P02748	Complement component C9	75912	96892	104033	11934.7	92278.9	0.129332
P02749	Beta-2-glycoprotein 1	255409	291374	293432	17459.4	280072	0.0623389
P02750	Leucine-rich alpha-2-glycoprotein	211833	190721	258510	28323.2	220355	0.128535
P02751	Fibronectin	36016.1	41337.2	47207.5	4570.68	41520.3	0.110083
P02753	Retinol-binding protein 4	18759.5	12506.6	20259.6	3357.54	17175.2	0.195487
P02760	Protein AMBP	276340	252990	207959	28380.3	245763	0.115478
P02763	Alpha-1-acid glycoprotein 1	936144	1.01135e+06	830364	74238.6	925954	0.0801753
P02765	Alpha-2-HS-glycoprotein	385196	413852	365401	19889.9	388150	0.0512429
P02766	Transthyretin	79815.2	74886.5	102804	12166.2	85835.1	0.141739
P02768	Serum albumin	144936720	134966000	139082528	4.09108e+06	1.39662e+08	0.0292928
P02774	Vitamin D-binding protein	442981	420611	450690	12756.8	438094	0.0291188
P02778	C-X-C motif chemokine 10	93328.3	106818	90137.5	7229.51	96761.2	0.0747149
P02787	Serotransferrin	3.72761e+06	3.88175e+06	3736441	70674.1	3781936	0.0186873
P02788	Lactotransferrin	190151136	196861168	191506960	2.89694e+06	1.9284e+08	0.0150225
P02790	Hemopexin	4.72157e+06	4.61576e+06	4.37314e+06	145852	4.57016e+06	0.031914
P02814	Submaxillary gland androgen-regulated protein 3B	5.60433e+06	4999101	5384693	250159	5.32937e+06	0.0469398
P03950	Angiogenin	35476.1	68070.5	64438.2	14584.6	55994.9	0.260463				58696.1	62339.3
P03952	Plasma kallikrein	22076.2	17415.6	25642.9	3368.69	21711.6	0.155157
P03973	Antileukoproteinase	4.44553e+06	4.66105e+06	4.32385e+06	139428	4.47681e+06	0.0311444
P04003	C4b-binding protein alpha chain	123768	122545	133359	4835.17	126557	0.0382053
P04004	Vitronectin	493286	421961	506114	37018.8	473787	0.0781338
P04040	Catalase	25652.9	20576.5	10244	6411.49	18824.5	0.340593				14707.1	13499.7
P04066	Tissue alpha-L-fucosidase	126336	106576	55465.8	29861.2	96125.8	0.310648				112639	96227.7
P04075	Fructose-bisphosphate aldolase A	1311831	1.02523e+06	1.19048e+06	117460	1.17585e+06	0.099894
P04080	Cystatin-B	315414	303376	322425	7866.54	313738	0.0250736
P04083	Annexin A1	7165970	6214859	5371526	733019	6250785	0.117268
P04114	Apolipoprotein B-100	8421.66	10749.9	4864.14	2420.27	8011.91	0.302084				Filtered	4510.51
P04155	Trefoil factor 1	84197.8	65897	72931.7	7537.54	74342.2	0.10139
P04179	Superoxide dismutase [Mn], mitochondrial	80423	13233.8	69765.8	29484.2	54474.2	0.54125				55039	56679.7
P04196	Histidine-rich glycoprotein	193340	191904	183367	4402.19	189537	0.023226
P04207	Ig kappa chain V-III region CLL	114209	111861	117273	2215.78	114448	0.0193606
P04211	Ig lambda chain V region 4A	1.0746e+06	945349	828550	100493	949500	0.105837
P04217	Alpha-1B-glycoprotein	569598	361190	390877	92048.4	440555	0.208937				401142	356911
P04220	Ig mu heavy chain disease protein	205617	273572	264757	30172	247982	0.12167
P04233	HLA class II histocompatibility antigen gamma chain	33847.5	24965.9	Filtered	4440.77	29406.7	0.151012
P04264	Keratin, type II cytoskeletal 1	161440	169868	158415	4846.02	163241	0.0296862
P04406	Glyceraldehyde-3-phosphate dehydrogenase	3.32695e+06	2.89462e+06	3.24956e+06	188229	3.15704e+06	0.059622
P04424	Argininosuccinate lyase	27706.3	32216	20855.9	4670.45	26926.1	0.173455
P04433	Ig kappa chain V-III region VG (Fragment)	1.98013e+06	1844713	2.05502e+06	87035.1	1959954	0.0444067
P04434	Ig kappa chain V-III region VH (Fragment)	1.77698e+06	3.76029e+06	142287	1.47933e+06	1.89319e+06	0.781396				2.02627e+06	2.0379e+06
P04632	Calpain small subunit 1	553726	614991	538137	33171	568951	0.058302
P04745	Alpha-amylase 1	109817	96073.7	104517	5659.2	103469	0.0546947
P04792	Heat shock protein beta-1	8020547	7.47353e+06	7.20284e+06	340122	7565638	0.0449561
P04899	Guanine nucleotide-binding protein G(i) subunit alpha-2	31492.8	13826.7	19202.5	7394	21507.3	0.34379				33746.6	23621.5
P04908;P0C0S8;P20671;Q16777;Q6FI13;Q7L7L0;Q93077;Q96KK5;Q99878;Q9BTM1	Histone H2A type 1-B/E;Histone H2A type 1;Histone H2A type 1-D;Histone H2A type 2-C;Histone H2A type 2-A;Histone H2A type 3;Histone H2A type 1-C;Histone H2A type 1-H;Histone H2A type 1-J;Histone H2A.J	81741.9	98464	84619.5	7299.76	88275.1	0.0826933
P05089	Arginase-1	66167.4	12773	10937.9	25613.8	29959.4	0.854951				17849	27153.5
P05090	Apolipoprotein D	522454	611098	562102	36255.8	565218	0.0641447
P05109	Protein S100-A8	3.77443e+06	3.63402e+06	3641515	64495.5	3683322	0.0175101
P05120	Plasminogen activator inhibitor 2	27788.8	23875.6	18873.3	3648.78	23512.6	0.155184
P05155	Plasma protease C1 inhibitor	831835	839756	770838	30791.3	814143	0.0378205
P05156	Complement factor I	41528.8	49903.1	66567.4	10407	52666.4	0.197603
P05164	Myeloperoxidase	76240.8	79242.8	81873.8	2301.33	79119.1	0.0290869
P05186	Alkaline phosphatase, tissue-nonspecific isozyme	18701.7	12968.5	11612.2	3072.64	14427.4	0.212972				12682.1	7192.42
P05198	Eukaryotic translation initiation factor 2 subunit 1	25684	17669.8	27641.1	4313.84	23664.9	0.182288
P05386	60S acidic ribosomal protein P1	110563	69406.5	93250.2	16872.3	91073.1	0.185261
P05387	60S acidic ribosomal protein P2	146727	124294	154348	12756.9	141790	0.0899705
P05388	60S acidic ribosomal protein P0	75780.9	72470.6	77413.5	2056.34	75221.7	0.027337
P05452	Tetranectin	99889.9	58266.7	63142.7	18579	73766.4	0.251863				78226.6	110169
P05455	Lupus La protein	16616.5	18176.2	13122.4	2112.99	15971.7	0.132296
P05543	Thyroxine-binding globulin	744227	93916.7	399006	265656	412383	0.644198				480857	999357
P05546	Heparin cofactor 2	112527	125045	115144	5391.35	117572	0.0458558
P05787	Keratin, type II cytoskeletal 8	260339	258196	243940	7278.58	254159	0.028638
P06280	Alpha-galactosidase A	11802.9	Filtered	3687.62	4057.62	7745.24	0.523886				6911.56	9628.8
P06311	Ig kappa chain V-III region IARC/BL41	27244.7	16677.5	23602.1	4382.84	22508.1	0.194723
P06318;P06319	Ig lambda chain V-VI region WLT;Ig lambda chain V-VI region EB4	206745	143898	213587	31363.6	188077	0.16676
P06331	Ig heavy chain V-II region ARH-77	971014	962061	1.03688e+06	33361.5	989985	0.033699
P06396	Gelsolin	3254478	2.51884e+06	2.65634e+06	319347	2.80989e+06	0.113651
P06576	ATP synthase subunit beta, mitochondrial	42937.2	52797.5	46081	4112.6	47271.9	0.0869987
P06681	Complement C2	32450.1	29057.2	34405.4	2209.51	31970.9	0.0691099
P06702	Protein S100-A9	1.82868e+06	1.53501e+06	1900898	158232	1.75486e+06	0.0901679
P06703	Protein S100-A6	11154606	12499695	9876651	1.07097e+06	11176984	0.0958192
P06727	Apolipoprotein A-IV	197156	211172	213629	7255.99	207319	0.0349991
P06733	Alpha-enolase	3.29085e+06	2.40178e+06	2.24086e+06	461739	2.64449e+06	0.174604
P06737	Glycogen phosphorylase, liver form	105713	117979	126238	8432.3	116644	0.0722911
P06744	Glucose-6-phosphate isomerase	184283	175067	202417	11361.7	187256	0.0606747
P06748	Nucleophosmin	21215.2	16267	22475.4	2679.51	19985.9	0.13407
P06753	Tropomyosin alpha-3 chain	289930	318628	311831	12244.7	306796	0.0399114
P06865	Beta-hexosaminidase subunit alpha	59373.2	51564.5	57924.2	3391.53	56287.3	0.0602539
P07108	Acyl-CoA-binding protein	138972	121473	122820	7950.8	127755	0.0622348
P07195	L-lactate dehydrogenase B chain	136772	185342	182154	22182.8	168089	0.131971
P07203	Glutathione peroxidase 1	141632	139395	160462	9447.79	147163	0.0641994
P07225	Vitamin K-dependent protein S	18056.2	33287	24825.2	6230.7	25389.5	0.245405				18240.9	38814.6
P07237	Protein disulfide-isomerase	211599	213308	206432	2923.05	210446	0.0138898
P07339	Cathepsin D	623805	683709	666870	25224.7	658128	0.038328
P07355	Annexin A2	2.00568e+06	2465789	1935060	235315	2.13551e+06	0.110192
P07357	Complement component C8 alpha chain	29736.7	27401.3	19446.6	4404.75	25528.2	0.172544
P07358	Complement component C8 beta chain	13591.9	16116.5	36916.8	10451.3	22208.4	0.470604				16766.2	19225.9
P07360	Complement component C8 gamma chain	64862.2	66412.1	40006.8	12098.8	57093.7	0.211911				61469.8	50871
P07384	Calpain-1 catalytic subunit	828766	907101	809338	42257.6	848402	0.0498085
P07437	Tubulin beta chain	77831.9	87344	100164	9150.35	88446.7	0.103456
P07476	Involucrin	Filtered	5284.7	3972.16	656.271	4628.43	0.141791
P07602	Proactivator polypeptide	832026	913438	889467	34159.9	878310	0.0388928
P07686	Beta-hexosaminidase subunit beta	32239.8	29952.2	31690.9	975.102	31294.3	0.0311591
P07711	Cathepsin L1	63008.1	75977.5	76958.1	6357.57	71981.3	0.0883226
P07737	Profilin-1	1.74197e+06	1.70619e+06	1.6315e+06	46023.8	1.69322e+06	0.0271812
P07741	Adenine phosphoribosyltransferase	194847	197942	190335	3123.32	194374	0.0160686
P07814	Bifunctional glutamate/proline--tRNA ligase	10727.4	15703.6	10910.4	2303.89	12447.1	0.185094
P07858	Cathepsin B	745598	726261	690888	22652.9	720915	0.0314224
P07900	Heat shock protein HSP 90-alpha	840832	904345	927753	36722.8	890977	0.0412164
P07902	Galactose-1-phosphate uridylyltransferase	24048.9	24077.6	22277.2	842.043	23467.9	0.0358806
P07910	Heterogeneous nuclear ribonucleoproteins C1/C2	78271.5	73970.8	72941	2308.72	75061.1	0.0307578
P07954	Fumarate hydratase, mitochondrial	38040.8	52997	44306.1	6132.55	45114.6	0.135933
P07996	Thrombospondin-1	28112.4	49196.7	30073.1	9510.85	35794.1	0.26571				31776.8	42167.8
P08107	Heat shock 70 kDa protein 1A/1B	2313054	2279062	2181550	55734.8	2.25789e+06	0.0246845
P08133	Annexin A6	44536.7	43141.3	39520.5	2113.96	42399.5	0.0498582
P08174	Complement decay-accelerating factor	29157.5	35642.2	40628.2	4696.23	35142.6	0.133633
P08185	Corticosteroid-binding globulin	122734	170359	151701	19594.3	148265	0.132158
P08238	Heat shock protein HSP 90-beta	322665	331114	339524	6882.41	331101	0.0207864
P08263;P09210	Glutathione S-transferase A1;Glutathione S-transferase A2	469782	459519	429320	17173.9	452874	0.037922
P08294	Extracellular superoxide dismutase [Cu-Zn]	62585.2	55149.3	58065.6	3059.14	58600	0.0522038
P08571	Monocyte differentiation antigen CD14	132462	130153	133946	1560.57	132187	0.0118058
P08603	Complement factor H	259146	262878	264225	2148.26	262083	0.00819686
P08670	Vimentin	110453	101942	112343	4523.63	108246	0.0417903
P08697	Alpha-2-antiplasmin	80133.8	74200.9	66811.1	5449.81	73715.3	0.0739305
P08727	Keratin, type I cytoskeletal 19	760502	744458	690806	29802.2	731922	0.0407177
P08729	Keratin, type II cytoskeletal 7	138048	161392	156156	10001.1	151865	0.0658554
P08758	Annexin A5	1.31288e+06	1.27638e+06	1.24968e+06	25901.5	1279646	0.0202412
P08865	40S ribosomal protein SA	155729	163582	169373	5591.07	162895	0.0343232
P09211	Glutathione S-transferase P	6.02188e+06	6716192	6.29142e+06	285802	6.34317e+06	0.0450567
P09228	Cystatin-SA	31452.8	42999.9	33430.1	5042.33	35960.9	0.140217
P09382	Galectin-1	17076.3	13769.3	15192.1	1354.45	15345.9	0.0882615
P09417	Dihydropteridine reductase	23248	22085.3	22110.3	542.296	22481.2	0.0241222
P09429	High mobility group protein B1	86829	87503.2	74157.4	6138.52	82829.8	0.07411
P09467	Fructose-1,6-bisphosphatase 1	543387	497696	559342	26124.7	533475	0.0489708
P09488;P46439;Q03013	Glutathione S-transferase Mu 1;Glutathione S-transferase Mu 5;Glutathione S-transferase Mu 4	10264.6	9865.67	17432.6	3476.87	12521	0.277684				15727.3	17660.7
P09497	Clathrin light chain B	21097.4	3515.67	17077.7	7521.84	13896.9	0.54126				32905.5	23785.4
P09525	Annexin A4	2.79716e+06	2.95973e+06	2.4707e+06	203347	2.74253e+06	0.0741456
P09622	Dihydrolipoyl dehydrogenase, mitochondrial	8738.3	9269.61	6936.37	998.513	8314.76	0.120089
P09651;Q32P51	Heterogeneous nuclear ribonucleoprotein A1;Heterogeneous nuclear ribonucleoprotein A1-like 2	40336.9	41350.1	47915.6	3359.4	43200.9	0.0777623
P09668	Pro-cathepsin H	17275.4	20991.7	22042.7	2045.13	20103.3	0.101731
P09871	Complement C1s subcomponent	18481	23334.9	39904.2	9171.54	27240	0.336693				34801.2	26044.5
P09914	Interferon-induced protein with tetratricopeptide repeats 1	12613.4	27446.9	13508.5	6791.46	17856.3	0.38034				7819.27	7146.94
P09960	Leukotriene A-4 hydrolase	100795	95901.7	102554	2814.37	99750.2	0.0282142
P09972	Fructose-bisphosphate aldolase C	109665	153937	108034	21265.2	123879	0.171662
P0C0L4	Complement C4-A	460342	496512	506009	19674.9	487621	0.0403488
P0C0L5	Complement C4-B	65174.1	93497.1	77434.2	11597.5	78701.8	0.14736
P0CG05	Ig lambda-2 chain C regions	23569392	21566484	21712202	911777	2.22827e+07	0.0409186
P0DJI8	Serum amyloid A-1 protein	42610.3	56904	32341.6	10072.4	43952	0.229167				30558.7	38086.4
P10253	Lysosomal alpha-glucosidase	15635.6	13520.4	12041.1	1475.08	13732.4	0.107416
P10412;P16402;P16403	Histone H1.4;Histone H1.3;Histone H1.2	92198.8	93244.6	38489.1	25569.1	74644.2	0.342546				85321.5	89174.8
P10599	Thioredoxin	811999	673734	870043	82343.1	785258	0.104861
P10643	Complement component C7	19685.7	24340.4	22992.4	1955.56	22339.5	0.0875382
P10768	S-formylglutathione hydrolase	37363	38690.6	42033.5	1965.01	39362.4	0.049921
P10809	60 kDa heat shock protein, mitochondrial	249169	15268.3	222625	104568	162354	0.644076				265453	16941.8
P10909	Clusterin	4.98522e+06	5517264	5.06245e+06	234733	5.18831e+06	0.0452426
P11021	78 kDa glucose-regulated protein	215408	206112	210615	3795.76	210712	0.018014
P11142	Heat shock cognate 71 kDa protein	816561	834717	700376	59512.8	783884	0.0759204
P11172	Uridine 5'-monophosphate synthase	9773.7	6889.2	8819.7	1199.88	8494.2	0.141258
P11216	Glycogen phosphorylase, brain form	262296	224485	216607	19942.1	234463	0.0850546
P11274;Q12979	Breakpoint cluster region protein;Active breakpoint cluster region-related protein	14314.2	Filtered	8402.83	2955.67	11358.5	0.260216				13904.6	10376.2
P11413	Glucose-6-phosphate 1-dehydrogenase	224442	213608	160135	28111	199395	0.140982
P11586	C-1-tetrahydrofolate synthase, cytoplasmic	105842	109190	101001	3361.65	105344	0.031911
P11766	Alcohol dehydrogenase class-3	195929	162097	180016	13820.1	179347	0.077058
P11908	Ribose-phosphate pyrophosphokinase 2	32425.4	31040.5	27515.2	2067.1	30327	0.0681604
P11940	Polyadenylate-binding protein 1	60101.3	56654.2	72272.8	6699.65	63009.5	0.106328
P12081	Histidine--tRNA ligase, cytoplasmic	28991.2	33090.4	30690.2	1681.66	30923.9	0.0543804
P12109	Collagen alpha-1(VI) chain	7023.34	9331.41	8359.9	946.189	8238.22	0.114854
P12259	Coagulation factor V	20391.5	20592.2	16383.1	1938.62	19122.3	0.10138
P12268	Inosine-5'-monophosphate dehydrogenase 2	10703.9	Filtered	7302.83	1700.52	9003.35	0.188877
P12273	Prolactin-inducible protein	74837496	78731280	69532872	3.76993e+06	74367216	0.0506934
P12429	Annexin A3	392005	324574	335310	29583.3	350630	0.084372
P12814	Alpha-actinin-1	79475.6	84837.9	64929.8	8410.75	76414.5	0.110067
P12830	Cadherin-1	169006	203915	204809	16670.9	192577	0.0865676
P12955	Xaa-Pro dipeptidase	23880.3	30176.1	23218.8	3135.44	25758.4	0.121725
P12956	X-ray repair cross-complementing protein 6	37421.8	35393.3	40384.3	2049.43	37733.2	0.0543137
P13010	X-ray repair cross-complementing protein 5	24288.8	27623.7	24549.8	1514.32	25487.4	0.0594145
P13489	Ribonuclease inhibitor	544374	495320	469127	31188.6	502940	0.0620125
P13535	Myosin-8	57952.9	77278.5	Filtered	9662.83	67615.7	0.142908
P13639	Elongation factor 2	568173	552914	545623	9395.47	555570	0.0169114
P13645	Keratin, type I cytoskeletal 10	48548.2	45140	46480.5	1401.89	46722.9	0.0300044
P13646	Keratin, type I cytoskeletal 13	129436	89414.9	159973	28891.8	126275	0.228801				132396	136305
P13647	Keratin, type II cytoskeletal 5	56097	60032.1	63603.1	3065.56	59910.8	0.0511688
P13667	Protein disulfide-isomerase A4	159291	157868	122869	16844	146676	0.114838
P13671	Complement component C6	2.38738e+06	3.3337e+06	38033.1	1.3855e+06	1.91971e+06	0.721723				47374.6	1.3695e+06
P13693	Translationally-controlled tumor protein	68654.2	62819.6	67627.6	2543.25	66367.1	0.0383209
P13716	Delta-aminolevulinic acid dehydratase	73747.1	80752.3	61887.3	7786.16	72128.9	0.107948
P13796	Plastin-2	176917	178720	187276	4518.61	180971	0.0249687
P13797	Plastin-3	481309	509237	473497	15341.7	488014	0.031437
P13798	Acylamino-acid-releasing enzyme	110188	102381	106859	3198.74	106476	0.0300419
P13804	Electron transfer flavoprotein subunit alpha, mitochondrial	4000.47	1412.32	4719.89	1420.34	3377.56	0.420521				3040.69	4413.75
P13861	cAMP-dependent protein kinase type II-alpha regulatory subunit	11694.8	12334.6	20473.4	3996.04	14834.3	0.269379				14718.7	20207.5
P13928;Q5VT79	Annexin A8;Annexin A8-like protein 2	6071.2	Filtered	5918.3	76.4524	5994.75	0.0127532
P13987	CD59 glycoprotein	115666	80212.3	86389.8	15464	94089.4	0.164355
P14174	Macrophage migration inhibitory factor	926448	1.41974e+06	718643	294026	1.02161e+06	0.287806				762640	1.08106e+06
P14314	Glucosidase 2 subunit beta	74698.9	86785.8	87498.2	5872.94	82994.3	0.0707632
P14324	Farnesyl pyrophosphate synthase	49802.6	49855.6	49054.9	365.591	49571	0.00737508
P14550	Alcohol dehydrogenase [NADP(+)]	585514	646366	643574	28051.3	625151	0.0448712
P14555	Phospholipase A2, membrane associated	1.30678e+06	2.10638e+06	1.24504e+06	392296	1.55273e+06	0.252649				1.99881e+06	1.25402e+06
P14618	Pyruvate kinase isozymes M1/M2	4401263	4736070	4.3477e+06	171852	4.49501e+06	0.0382317
P14621	Acylphosphatase-2	27169.6	29559	20737.9	3725.13	25822.1	0.144261
P14625	Endoplasmin	193946	203033	188223	6097.78	195067	0.0312599
P14735	Insulin-degrading enzyme	22974.6	14055.3	19430.2	3666.75	18820	0.194832
P14780	Matrix metalloproteinase-9	15660.4	17079	18309.1	1082.22	17016.2	0.0635997
P14854	Cytochrome c oxidase subunit 6B1	8974.95	17381.9	15742.6	3638.76	14033.1	0.259297				9506.12	6258.56
P14866	Heterogeneous nuclear ribonucleoprotein L	19710	13584.7	11933.7	3345.23	15076.1	0.221889				23042.2	Filtered
P14868	Aspartate--tRNA ligase, cytoplasmic	22441.5	20229.3	17247.4	2128.21	19972.7	0.106556
P14923	Junction plakoglobin	46735	34047.5	26482.3	8355.84	35754.9	0.233698				28038.8	23223.9
P15104	Glutamine synthetase	177489	197530	198735	9744.05	191251	0.050949
P15121	Aldose reductase	70925.3	209679	74369.1	64612.7	118324	0.546064				123480	134022
P15144	Aminopeptidase N	44675.4	32235	30444.1	6328.95	35784.8	0.176861
P15170	Eukaryotic peptide chain release factor GTP-binding subunit ERF3A	26633.7	27508.6	21994.3	2419.77	25378.9	0.0953459
P15289	Arylsulfatase A	37567.9	21731.7	28158.9	6503.18	29152.9	0.223072				Filtered	10329.2
P15291	Beta-1,4-galactosyltransferase 1	27229.2	29176.4	31445.2	1722.86	29283.6	0.0588336
P15309	Prostatic acid phosphatase	17553.9	17340.4	9308.8	3837.45	14734.4	0.260442				7879.75	12852.3
P15311	Ezrin	469710	467993	540916	33978.6	492873	0.0689398
P15328	Folate receptor alpha	8805.01	10814.7	9342.73	849.49	9654.15	0.0879923
P15374	Ubiquitin carboxyl-terminal hydrolase isozyme L3	179651	88815.6	109227	38911.9	125898	0.309075				488.139	147526
P15531	Nucleoside diphosphate kinase A	70849.3	79843.1	72416.9	3922.78	74369.8	0.052747
P15559	NAD(P)H dehydrogenase [quinone] 1	73525.6	62749.2	68625.2	4405.47	68300	0.0645018
P15814	Immunoglobulin lambda-like polypeptide 1	17091018	22190900	5.76449e+06	6.86477e+06	1.50155e+07	0.45718				25005238	10953313
P15880	40S ribosomal protein S2	45958.5	43249.6	70339.5	12182.1	53182.5	0.229062				46372.4	45708.9
P15907	Beta-galactoside alpha-2,6-sialyltransferase 1	18149.6	21989.8	8725.58	5572.74	16288.3	0.342131				29445.9	5452.96
P15924	Desmoplakin	91416.9	28685.9	13630.5	33685.8	44577.8	0.755663				271790	195715
P15941	Mucin-1	17662	42534	29520.8	10157.6	29905.6	0.339655				13725.7	19505
P16035	Metalloproteinase inhibitor 2	20286.7	20457.4	14565.5	2738.1	18436.6	0.148515
P16083	Ribosyldihydronicotinamide dehydrogenase [quinone]	36845.4	34000.3	29166.5	3169.77	33337.4	0.0950815
P16152	Carbonyl reductase [NADPH] 1	275933	262838	271234	5416.32	270002	0.0200603
P16930	Fumarylacetoacetase	31297.8	31131.3	32316.8	524.034	31581.9	0.0165928
P17050	Alpha-N-acetylgalactosaminidase	13236.9	12984.6	19358.5	2947.03	15193.4	0.193968
P17174	Aspartate aminotransferase, cytoplasmic	52005.5	61868.1	44855.5	6974.74	52909.7	0.131824
P17655	Calpain-2 catalytic subunit	141075	212542	226185	37323.5	193267	0.193118
P17812	CTP synthase 1	39568.7	36849.4	47554.5	4543.22	41324.2	0.109941
P17858	6-phosphofructokinase, liver type	81106.9	98991.2	81339.2	8376.52	87145.8	0.0961208
P17931	Galectin-3	2.18659e+06	2.13274e+06	1.90508e+06	122006	2.0748e+06	0.0588038
P17936	Insulin-like growth factor-binding protein 3	67259.9	53473.8	45001	9173.04	55244.9	0.166043
P17980	26S protease regulatory subunit 6A	63580.2	58775	60592.2	1981.03	60982.5	0.0324853
P17987	T-complex protein 1 subunit alpha	137430	133165	149118	6743.55	139904	0.0482012
P18085	ADP-ribosylation factor 4	39101.5	47076.6	33860.5	5433.82	40012.9	0.135802
P18124	60S ribosomal protein L7	18658.2	19621.3	15392.4	1809.73	17890.6	0.101155
P18206	Vinculin	117070	94214.3	117260	10819.4	109515	0.0987938
P18510	Interleukin-1 receptor antagonist protein	639333	635143	586147	24145.2	620207	0.0389309
P18669	Phosphoglycerate mutase 1	440298	515070	528604	38832.9	494657	0.0785046
P18827	Syndecan-1	496053	511412	531091	14340.3	512852	0.0279618
P19013	Keratin, type II cytoskeletal 4	28727.4	65885	71042	18849.7	55218.1	0.341368				43585.6	80965.9
P19021	Peptidyl-glycine alpha-amidating monooxygenase	45223.4	47670.2	46218.5	1004.68	46370.7	0.0216662
P19338	Nucleolin	61391.5	70910	55186.1	6466.58	62495.9	0.103472
P19404	NADH dehydrogenase [ubiquinone] flavoprotein 2, mitochondrial	Filtered	9656.07	6064.46	1795.81	7860.26	0.228466				Filtered	21201.4
P19652	Alpha-1-acid glycoprotein 2	1.21507e+06	1.29652e+06	1.23233e+06	35044.1	1.24798e+06	0.0280808
P19823	Inter-alpha-trypsin inhibitor heavy chain H2	298505	291791	282164	6706.49	290820	0.0230606
P19827	Inter-alpha-trypsin inhibitor heavy chain H1	110826	102350	109851	3786.81	107676	0.0351686
P19957	Elafin	73384.9	66302.3	62761.1	4416.76	67482.8	0.0654502
P19971	Thymidine phosphorylase	720839	661683	528750	80324.8	637091	0.126081
P20042	Eukaryotic translation initiation factor 2 subunit 2	12659.8	14149.5	7727.28	2744.58	11512.2	0.238406				6573.99	7253.35
P20061	Transcobalamin-1	751981	611833	670412	57471.5	678075	0.0847567
P20062	Transcobalamin-2	12381.7	Filtered	14483.6	1050.96	13432.6	0.0782392
P20073	Annexin A7	82137.7	78227.3	74359.1	3175.62	78241.4	0.0405875
P20290	Transcription factor BTF3	Filtered	Filtered	20448.3	0	20448.3	0
P20339	Ras-related protein Rab-5A	201783	124552	123909	36559.6	150081	0.243599				104054	189746
P20591	Interferon-induced GTP-binding protein Mx1	51542.1	86732.8	47343.6	17662	61872.8	0.285457				46208.6	48305.8
P20618	Proteasome subunit beta type-1	131661	131233	102741	13533.2	121878	0.111038
P20810	Calpastatin	94305.6	68316.6	68234.9	12270.6	76952.4	0.159457
P21127;Q9UQ88	Cyclin-dependent kinase 11B;Cyclin-dependent kinase 11A	60746.9	83253.6	16054.2	27928	53351.6	0.523471				61045.7	52995.4
P21217;P51993;Q11128	Galactoside 3(4)-L-fucosyltransferase;Alpha-(1,3)-fucosyltransferase;Alpha-(1,3)-fucosyltransferase	Filtered	2806.97	8130.12	2661.58	5468.54	0.486707				9121.58	7846.88
P21281	V-type proton ATPase subunit B, brain isoform	82726.1	99502.9	87068.3	7109.71	89765.8	0.0792029
P21283	V-type proton ATPase subunit C 1	18827.9	7037.71	8394.48	5267.35	11420	0.461238				5298.57	10863.2
P21291	Cysteine and glycine-rich protein 1	6077.94	4852.51	14308.2	4198.54	8412.89	0.49906				11608.5	20108.6
P21399	Cytoplasmic aconitate hydratase	58678.7	72059.8	52446	8182.66	61061.5	0.134007
P21926	CD9 antigen	56346.8	16358.7	34466.7	16349.3	35724	0.457655				79296.6	49115.4
P21964	Catechol O-methyltransferase	227559	144341	228541	39462.6	200147	0.197168
P21980	Protein-glutamine gamma-glutamyltransferase 2	3.0921e+06	3.18297e+06	2.99954e+06	74885.1	3.09154e+06	0.0242226
P22059	Oxysterol-binding protein 1	12754.9	13597.5	15053.6	949.523	13802	0.0687961
P22061	Protein-L-isoaspartate(D-aspartate) O-methyltransferase	46841.2	44016.6	85930.1	19127.2	58929.3	0.324579				42764.7	26289.7
P22079	Lactoperoxidase	1714158	2.87151e+06	1.80978e+06	524500	2.13182e+06	0.246034				1.66472e+06	1.68559e+06
P22102	Trifunctional purine biosynthetic protein adenosine-3	62770.4	51078	55148.8	4846.22	56332.4	0.0860289
P22234	Multifunctional protein ADE2	8664.26	12046.9	10548.6	1383.94	10419.9	0.132817
P22314	Ubiquitin-like modifier-activating enzyme 1	421776	400284	363528	24050.3	395196	0.0608567
P22352	Glutathione peroxidase 3	157870	172809	177129	8251.4	169269	0.0487471
P22392	Nucleoside diphosphate kinase B	285343	348869	341798	28426.8	325337	0.0873766
P22528	Cornifin-B	220725	220702	249679	13654.4	230369	0.0592721
P22626	Heterogeneous nuclear ribonucleoproteins A2/B1	254521	246691	251542	3226.83	250918	0.0128601
P23083	Ig heavy chain V-I region V35	446511	380363	390165	29148.4	405680	0.0718508
P23141	Liver carboxylesterase 1	Filtered	15610	16113.6	251.784	15861.8	0.0158736
P23142	Fibulin-1	17943.2	12329.1	12776.4	2547.64	14349.6	0.177541
P23246	Splicing factor, proline- and glutamine-rich	11950.8	9157.89	13524.1	1805.52	11544.3	0.1564
P23280	Carbonic anhydrase 6	53540.1	46465	41384.9	4984.58	47130	0.105762
P23284	Peptidyl-prolyl cis-trans isomerase B	276086	270034	270407	2769.15	272176	0.0101741
P23381	Tryptophan--tRNA ligase, cytoplasmic	276128	232249	253459	17916.6	253945	0.0705529
P23396	40S ribosomal protein S3	65226.5	64224.4	63833.3	586.744	64428.1	0.00910696
P23526	Adenosylhomocysteinase	122700	158405	140616	14576.4	140574	0.103693
P23528	Cofilin-1	522499	524538	533274	4673.61	526770	0.0088722
P23588	Eukaryotic translation initiation factor 4B	62513.4	101936	18001.3	34287.1	60816.8	0.563777				119923	157921
P23743	Diacylglycerol kinase alpha	Filtered	Filtered	Filtered	#DIV/0!	#DIV/0!	#DIV/0!				29020.7	28148.7
P24158	Myeloblastin	111063	107150	91981.3	8229.38	103398	0.0795893
P24534	Elongation factor 1-beta	64637	85340.7	60389	10899.9	70122.3	0.155442
P24592	Insulin-like growth factor-binding protein 6	18073.3	21768.5	20136.8	1511.98	19992.8	0.0756261
P24666	Low molecular weight phosphotyrosine protein phosphatase	55530.1	50724	48500.6	2933.65	51584.9	0.0568702
P25311	Zinc-alpha-2-glycoprotein	22671260	21503308	21604108	528424	2.19262e+07	0.0241001
P25325	3-mercaptopyruvate sulfurtransferase	21813.5	20843	24013.7	1326.46	22223.4	0.0596876
P25398	40S ribosomal protein S12	35377.5	38323.8	33014	2172.08	35571.8	0.0610618
P25685	DnaJ homolog subfamily B member 1	18128.8	27343.8	22000.1	3777.98	22490.9	0.167978
P25774	Cathepsin S	48101.4	48664.5	49409.3	535.644	48725.1	0.0109932
P25786	Proteasome subunit alpha type-1	82144.3	101511	99510.8	8696.64	94388.8	0.0921363
P25787	Proteasome subunit alpha type-2	55135.7	45064.1	49597.7	4118.53	49932.5	0.0824819
P25788	Proteasome subunit alpha type-3	153705	130431	130385	10982.4	138173	0.0794828
P25789	Proteasome subunit alpha type-4	128788	126749	92112.1	16829	115883	0.145224
P25815	Protein S100-P	2.8026e+06	5434882	5579387	1.2763e+06	4.60562e+06	0.277117				5670221	5876366
P26038	Moesin	801400	815195	730041	37317.7	782212	0.047708
P26045	Tyrosine-protein phosphatase non-receptor type 3	103129	17089.2	94178.6	38623.1	71465.6	0.540444				23920.4	53757
P26447	Protein S100-A4	7507690	7.86801e+06	7.55843e+06	159250	7.64471e+06	0.0208314
P26583	High mobility group protein B2	23986.4	23813.5	17080.1	3215.67	21626.7	0.14869
P26599	Polypyrimidine tract-binding protein 1	33141.6	29645.6	28397	2008.08	30394.7	0.0660667
P26639	Threonine--tRNA ligase, cytoplasmic	25346.4	17717.8	31828.3	5766.91	24964.1	0.231008				40496.4	68621.5
P26641	Elongation factor 1-gamma	140453	138485	152842	6355.14	143927	0.0441553
P26885	Peptidyl-prolyl cis-trans isomerase FKBP2	86157.8	92535.5	92230.4	2937.19	90307.9	0.0325242
P27169	Serum paraoxonase/arylesterase 1	86386.4	87676.2	86602.7	563.983	86888.4	0.00649089
P27348	14-3-3 protein theta	168086	175994	174364	3409.18	172815	0.0197274
P27361	Mitogen-activated protein kinase 3	44498.7	45251.2	42910.5	975.667	44220.1	0.0220639
P27482	Calmodulin-like protein 3	231896	248392	241086	6749.29	240458	0.0280685
P27635	60S ribosomal protein L10	8363.9	12350.7	6876.38	2311.22	9196.99	0.251302				Filtered	Filtered
P27695	DNA-(apurinic or apyrimidinic site) lyase	43327.4	39204	49967.6	4434.08	44166.3	0.100395
P27701	CD82 antigen	16859.3	34252	17224.2	8114.34	22778.5	0.356228				113397	4456.71
P27797	Calreticulin	206126	213767	221606	6319.85	213833	0.0295551
P28062	Proteasome subunit beta type-8	38993	44990.5	51131.1	4955.49	45038.2	0.110029
P28065	Proteasome subunit beta type-9	134580	124052	134347	4909.01	130993	0.0374754
P28066	Proteasome subunit alpha type-5	72456.2	73407.7	77034.1	1972.39	74299.4	0.0265465
P28070	Proteasome subunit beta type-4	115498	90764.5	89289.8	12022.4	98517.6	0.122033
P28072	Proteasome subunit beta type-6	14918	11921.9	8546.49	2602.71	11795.5	0.220653				15559.3	11890.8
P28161	Glutathione S-transferase Mu 2	2143.12	1874.59	3626.73	770.514	2548.15	0.302382				2143.11	3331.83
P28325	Cystatin-D	40137.5	Filtered	12021.2	14058.2	26079.3	0.539053				8486.31	27921.5
P28482	Mitogen-activated protein kinase 1	103572	103270	110204	3199.86	105682	0.0302783
P28799	Granulins	76240.6	94704.6	85591.4	7538.1	85512.2	0.0881523
P28838	Cytosol aminopeptidase	464803	501796	390592	46238.8	452397	0.102209
P29034	Protein S100-A2	Filtered	Filtered	3760.52	0	3760.52	0
P29218	Inositol monophosphatase 1	46684.9	53649.1	54570.6	3520.32	51634.9	0.0681771
P29350	Tyrosine-protein phosphatase non-receptor type 6	4803.46	10925.2	14740.4	4093	10156.3	0.402999				14025	10782.4
P29373	Cellular retinoic acid-binding protein 2	34691.6	35636.4	31999.2	1540.99	34109.1	0.0451784
P29401	Transketolase	252105	368435	394148	61797.1	338229	0.182708
P29466	Caspase-1	28200	30825.3	28160.9	1246.91	29062.1	0.042905
P29508	Serpin B3	141221	172135	336537	85720.6	216631	0.395698				1.4436e+06	521963
P29622	Kallistatin	31275.9	121172	31024.5	42436.7	61157.4	0.693893				27530.1	24986.4
P29692	Elongation factor 1-delta	79222.3	118343	79255.3	18433.9	92273.5	0.199774
P29966	Myristoylated alanine-rich C-kinase substrate	17424.9	30382	43518	10652.6	30441.6	0.349934				26117.4	30315.6
P30040	Endoplasmic reticulum resident protein 29	75142	78967.1	66259.3	5323.12	73456.1	0.0724667
P30041	Peroxiredoxin-6	2.18554e+06	2.12492e+06	1.85871e+06	141953	2.05639e+06	0.0690302
P30043	Flavin reductase (NADPH)	216699	176280	116733	41059.1	169904	0.241661				128556	100398
P30044	Peroxiredoxin-5, mitochondrial	1.93999e+06	1.99405e+06	1.96093e+06	22257.7	1.96499e+06	0.0113271
P30046	D-dopachrome decarboxylase	72579.7	84611.4	85359.3	5856.03	80850.1	0.0724306
P30048	Thioredoxin-dependent peroxide reductase, mitochondrial	97528.2	92561.4	57850.3	17650.5	82646.7	0.213566				62103.4	55470.2
P30050	60S ribosomal protein L12	44302	62277.9	61715.8	8344.59	56098.6	0.148749
P30084	Enoyl-CoA hydratase, mitochondrial	39781.8	42269.5	48712.7	3763.33	43588	0.0863385
P30085	UMP-CMP kinase	425571	488076	506074	34499.3	473240	0.0729001
P30086	Phosphatidylethanolamine-binding protein 1	1.25583e+06	1.3395e+06	1.44618e+06	77896.3	1.34717e+06	0.0578221
P30101	Protein disulfide-isomerase A3	467831	483093	496470	11700.1	482465	0.0242506
P30153	Serine/threonine-protein phosphatase 2A 65 kDa regulatory subunit A alpha isoform	132918	137600	142259	3813.59	137592	0.0277166
P30419	Glycylpeptide N-tetradecanoyltransferase 1	28636.3	16370.3	23656.6	5037.01	22887.7	0.220075				20248.4	21971.8
P30520	Adenylosuccinate synthetase isozyme 2	102613	95106	109603	5919.49	102441	0.0577846
P30626	Sorcin	33401.1	36085.9	35108.9	1109.5	34865.3	0.0318225
P30711	Glutathione S-transferase theta-1	587907	263621	29865.6	228816	293798	0.778823				360194	128375
P30740	Leukocyte elastase inhibitor	1.4977e+06	1354161	1.41282e+06	58924.9	1.42156e+06	0.0414509
P30838	Aldehyde dehydrogenase, dimeric NADP-preferring	2.08986e+06	2375998	2.12119e+06	128144	2.19568e+06	0.0583619
P31025	Lipocalin-1	366112032	401411392	332911840	2.79692e+07	3.66812e+08	0.0762495
P31146	Coronin-1A	63782.8	59034.8	50654.2	5427.7	57823.9	0.093866
P31150	Rab GDP dissociation inhibitor alpha	351920	300527	303812	23491	318753	0.0736966
P31153	S-adenosylmethionine synthase isoform type-2	115458	137504	141277	11386.4	131413	0.0866457
P31483;Q01085	Nucleolysin TIA-1 isoform p40;Nucleolysin TIAR	10844.5	14917.5	12744.9	1664.06	12835.6	0.129644
P31939	Bifunctional purine biosynthesis protein PURH	107402	101483	97677.5	4001.09	102188	0.0391544
P31941	Probable DNA dC->dU-editing enzyme APOBEC-3A	399158	471768	503762	43764.2	458229	0.0955072
P31943	Heterogeneous nuclear ribonucleoprotein H	22170.8	21504	23994.6	1052.72	22556.4	0.0466704
P31944	Caspase-14	29360.6	30307.3	19224.7	5016.16	26297.5	0.190747
P31946	14-3-3 protein beta/alpha	1.28833e+06	1.37008e+06	1.44927e+06	65704.4	1.36923e+06	0.0479865
P31947	14-3-3 protein sigma	322874	250160	333404	37010.3	302146	0.122492
P31948	Stress-induced-phosphoprotein 1	81607.5	85891.7	82800.8	1805.31	83433.3	0.0216377
P31949	Protein S100-A11	1.17409e+06	1117318	1.10542e+06	29965.2	1.13228e+06	0.0264645
P32119	Peroxiredoxin-2	425125	448499	396829	21126.4	423484	0.049887
P32189;Q14409	Glycerol kinase;Putative glycerol kinase 3	9878.89	Filtered	7541.94	1168.47	8710.42	0.134147
P32455	Interferon-induced guanylate-binding protein 1	33691.8	35631.9	28681.3	2928.4	32668.3	0.0896404
P32456	Interferon-induced guanylate-binding protein 2	34200.8	40076	39581	2660.62	37952.6	0.0701039
P33176	Kinesin-1 heavy chain	9175.58	18013.6	8522.37	4328.47	11903.8	0.363619				12690.7	7086.57
P33241	Lymphocyte-specific protein 1	26513	34129	43516	6953.97	34719.3	0.200291				22724.9	34141.1
P33908	Mannosyl-oligosaccharide 1,2-alpha-mannosidase IA	4408.59	5207.48	4252.35	418.318	4622.81	0.0904899
P34096	Ribonuclease 4	243688	205379	194509	21093.4	214526	0.0983257
P34896	Serine hydroxymethyltransferase, cytosolic	87795.9	97876.3	105355	7194.46	97008.9	0.0741628
P34913	Bifunctional epoxide hydrolase 2	35506	20475.4	13805.3	9075.81	23262.2	0.390153				25585.7	10211.6
P34932	Heat shock 70 kDa protein 4	75103.3	71410.7	64171.8	4540.36	70228.6	0.0646511
P34949	Mannose-6-phosphate isomerase	27667.4	30168	22122	3362.24	26652.5	0.126151
P35219	Carbonic anhydrase-related protein	19722.9	23939.9	21536	1727.2	21732.9	0.0794739
P35221	Catenin alpha-1	16464	18153	16342.1	826.445	16986.4	0.0486534
P35222	Catenin beta-1	12262.1	33575.2	17352.3	9088.1	21063.2	0.431468				15060.4	13622.6
P35237	Serpin B6	67895.1	83786.4	83619.7	7452.23	78433.7	0.0950131
P35268	60S ribosomal protein L22	11497.5	Filtered	28184.8	8343.65	19841.1	0.420523				37667	27438.5
P35270	Sepiapterin reductase	9342.67	Filtered	Filtered	0	9342.67	0
P35321	Cornifin-A	92180.4	105623	94402.9	5883.38	97402.1	0.060403
P35326	Small proline-rich protein 2A	55713.4	53640.2	56906.1	1349.35	55419.9	0.0243477
P35527	Keratin, type I cytoskeletal 9	70244.2	64817	48689	9154.2	61250.1	0.149456
P35542	Serum amyloid A-4 protein	134280	127262	113760	8515.69	125101	0.0680706
P35573	Glycogen debranching enzyme	13828.9	12913.9	16281.1	1421.59	14341.3	0.0991257
P35579	Myosin-9	109572	103968	159054	24752.7	124198	0.1993
P35580	Myosin-10	139891	161727	231799	39206.2	177806	0.2205				137400	189222
P35606	Coatomer subunit beta'	38701.8	34951.2	45582.5	4402.48	39745.2	0.110768
P35754	Glutaredoxin-1	116284	97150.2	146721	20411.7	120052	0.170024
P35813	Protein phosphatase 1A	20101	20547.7	16897.1	1625.89	19181.9	0.0847619
P35858	Insulin-like growth factor-binding protein complex acid labile subunit	29794.2	29450	21821	3680.17	27021.7	0.136193
P35998	26S protease regulatory subunit 7	18801.2	21621	19876	1161.99	20099.4	0.0578123
P36405	ADP-ribosylation factor-like protein 3	56032.3	57005.6	51927	2200.81	54988.3	0.0400232
P36543	V-type proton ATPase subunit E 1	40294.1	123246	53269.5	36432.7	72269.8	0.504121				78918	22747.3
P36578	60S ribosomal protein L4	26820.2	26900.5	26970.2	61.2968	26897	0.00227895
P36871	Phosphoglucomutase-1	80872.9	91452.2	69742.4	8863.95	80689.2	0.109853
P36915	Guanine nucleotide-binding protein-like 1	6822.6	17997.5	11171.8	4599.32	11997.3	0.383363				20571.3	13098
P36952	Serpin B5	207074	225167	201828	9997.39	211356	0.0473011
P36955	Pigment epithelium-derived factor	100152	109339	103067	3833.22	104186	0.0367922
P36969	Phospholipid hydroperoxide glutathione peroxidase, mitochondrial	35073.4	21957.3	20390.4	6583.45	25807	0.255103				18382	18383.7
P37802	Transgelin-2	663587	631574	657474	13876.5	650878	0.0213196
P37837	Transaldolase	364229	306911	281355	34651.3	317498	0.109139
P38159;Q96E39	RNA-binding motif protein, X chromosome;RNA binding motif protein, X-linked-like-1	22522.3	22271.2	20319.9	984.38	21704.5	0.0453538
P38606	V-type proton ATPase catalytic subunit A	60957.9	50661.1	67848.5	7062.52	59822.5	0.118058
P38646	Stress-70 protein, mitochondrial	20120.7	21085.7	49089.1	13434.1	30098.5	0.446339				8769.77	16769.6
P39687	Acidic leucine-rich nuclear phosphoprotein 32 family member A	51631.3	4668.03	31389.8	19233.4	29229.7	0.658009				32283.3	30636.2
P40121	Macrophage-capping protein	464150	578919	444004	59422.8	495691	0.119879
P40227	T-complex protein 1 subunit zeta	55719.5	46388.8	54287	4102.76	52131.8	0.0786998
P40306	Proteasome subunit beta type-10	54623.6	66345.7	79796.7	10284.9	66922	0.153685
P40394	Alcohol dehydrogenase class 4 mu/sigma chain	578923	553052	574400	11282.1	568792	0.0198352
P40429;Q6NVV1	60S ribosomal protein L13a;Putative 60S ribosomal protein L13a-like MGC87657	18290.7	21648.1	19562.3	1384	19833.7	0.0697804
P40616	ADP-ribosylation factor-like protein 1	Filtered	3582.12	3056.78	262.671	3319.45	0.079131
P40763	Signal transducer and activator of transcription 3	25769.7	21823.2	20098.2	2373.87	22563.7	0.105207
P40925	Malate dehydrogenase, cytoplasmic	1.24609e+06	1.1797e+06	1.11428e+06	53810.4	1.18002e+06	0.0456011
P40926	Malate dehydrogenase, mitochondrial	227648	269350	245033	17103.1	247344	0.0691472
P41226	Ubiquitin-like modifier-activating enzyme 7	39339.3	28470.5	46815.6	7531.93	38208.5	0.197127
P41240	Tyrosine-protein kinase CSK	20912.9	19996.9	20392.8	375.075	20434.2	0.0183552
P41250	Glycine--tRNA ligase	4568.14	3104.29	18083.2	6742.61	8585.19	0.785377				25654.9	17377.7
P41252	Isoleucine--tRNA ligase, cytoplasmic	19217.3	14847	Filtered	2185.18	17032.2	0.128297
P41743	Protein kinase C iota type	9273.15	Filtered	7147.1	1063.02	8210.12	0.129477
P42025	Beta-centractin	28699.7	17672.2	22429.2	4516.09	22933.7	0.196919
P42224	Signal transducer and activator of transcription 1-alpha/beta	160178	187948	153920	14788.2	167349	0.0883677
P42330	Aldo-keto reductase family 1 member C3	9569.94	697.533	3186.71	3736.62	4484.73	0.833189				9904.82	5333.99
P42574	Caspase-3	68953	75991.1	56094.8	8237.66	67013	0.122926
P43034	Platelet-activating factor acetylhydrolase IB subunit alpha	30312.6	27198.3	25245.7	2086.62	27585.5	0.0756417
P43251	Biotinidase	43926.7	44239.3	45089.5	491.348	44418.5	0.0110618
P43487	Ran-specific GTPase-activating protein	35122.4	50705.6	40426	6469	42084.7	0.153714
P43490	Nicotinamide phosphoribosyltransferase	238016	266430	244585	12146.2	249677	0.0486478
P43652	Afamin	67308.5	61235.2	53411.4	5688.48	60651.7	0.0937892
P43686	26S protease regulatory subunit 6B	30412.6	25739.9	15866.4	6063.67	24006.3	0.252587				32724.5	29968.2
P45974	Ubiquitin carboxyl-terminal hydrolase 5	103617	100367	119867	8530.05	107950	0.0790182
P46108	Adapter molecule crk	38893.3	35516.6	35667.1	1557.5	36692.3	0.0424476
P46109	Crk-like protein	6594.8	6232.84	7744.67	644.536	6857.44	0.0939908
P46379	Large proline-rich protein BAG6	5682.77	9419.54	Filtered	1868.38	7551.15	0.24743				8223.67	6470.65
P46459	Vesicle-fusing ATPase	103639	114573	107006	4572.49	108406	0.0421792
P46776	60S ribosomal protein L27a	95581.1	89804.3	92722	2358.39	92702.4	0.0254405
P46777	60S ribosomal protein L5	38519.1	46981.5	43238.3	3462.4	42912.9	0.0806842
P46778	60S ribosomal protein L21	Filtered	Filtered	16574.5	0	16574.5	0
P46781	40S ribosomal protein S9	72761.6	26527.3	50941	18885	50076.6	0.377121				59487.7	85725.4
P46782	40S ribosomal protein S5	45340.1	18397.3	22915.8	11781.2	28884.4	0.407875				8469.69	30542.1
P46783	40S ribosomal protein S10	18139.7	20830.3	20557	1209.09	19842.3	0.060935
P46926	Glucosamine-6-phosphate isomerase 1	75899.3	66070.1	67282.1	4375.94	69750.5	0.062737
P46940	Ras GTPase-activating-like protein IQGAP1	162211	147045	195930	20430.5	168395	0.121325
P46976	Glycogenin-1	50570.7	62659.5	55049.3	4990.16	56093.2	0.088962
P47755	F-actin-capping protein subunit alpha-2	687038	54994.2	3989023	1.72495e+06	1.57702e+06	1.09381				80549.3	3.78247e+06
P47756	F-actin-capping protein subunit beta	166591	182374	157251	10368.2	168738	0.0614457
P47895	Aldehyde dehydrogenase family 1 member A3	489851	624994	559566	55181	558137	0.0988664
P47897	Glutamine--tRNA ligase	28991.4	30033.3	25935.6	1738.91	28320.1	0.061402
P47914	60S ribosomal protein L29	Filtered	Filtered	30952.1	0	30952.1	0
P47989	Xanthine dehydrogenase/oxidase	78241.4	77990.1	73663.5	2101.31	76631.7	0.0274209
P48147	Prolyl endopeptidase	106608	99056.8	118830	8147.11	108165	0.0753213
P48444	Coatomer subunit delta	28493.1	34774.9	23998.5	4419.53	29088.8	0.151932
P48506	Glutamate--cysteine ligase catalytic subunit	12001.7	6096.63	8674.32	2417.2	8924.21	0.270858				13675.6	6189.98
P48556	26S proteasome non-ATPase regulatory subunit 8	65858.9	19646.7	29437.2	19882.9	38314.3	0.518941				28609	47752.5
P48637	Glutathione synthetase	55949.3	54108.9	52182.6	1537.88	54080.3	0.028437
P48643	T-complex protein 1 subunit epsilon	74147.1	69520.9	62853.7	4635.53	68840.6	0.0673372
P48723	Heat shock 70 kDa protein 13	15152.3	15345.5	18701.8	1629.62	16399.9	0.0993678
P48735	Isocitrate dehydrogenase [NADP], mitochondrial	87966.4	69578.1	97983.8	11763.2	85176.1	0.138105
P49189	4-trimethylaminobutyraldehyde dehydrogenase	125396	124167	97504.3	12868.4	115689	0.111233
P49257	Protein ERGIC-53	19786.2	22450.8	21387.2	1095.18	21208.1	0.0516399
P49327	Fatty acid synthase	18086.1	21592.6	19316.7	1452.54	19665.1	0.0738639
P49354	Protein farnesyltransferase/geranylgeranyltransferase type-1 subunit alpha	11992.4	15021.4	7839.95	2943.76	11617.9	0.253381				11218.9	11525.8
P49368	T-complex protein 1 subunit gamma	148484	139428	126850	8871.34	138254	0.064167
P49407	Beta-arrestin-1	17434.6	19062	22335.3	2037.94	19610.6	0.10392
P49411	Elongation factor Tu, mitochondrial	16842.8	16147.7	14444.1	1007.7	15811.5	0.0637324
P49419	Alpha-aminoadipic semialdehyde dehydrogenase	95620.5	102228	104016	3610.89	100622	0.0358858
P49441	Inositol polyphosphate 1-phosphatase	21350.2	18970.7	21084.2	1064.6	20468.4	0.0520117
P49588	Alanine--tRNA ligase, cytoplasmic	Filtered	20798.6	21961.7	581.552	21380.1	0.0272006
P49591	Serine--tRNA ligase, cytoplasmic	16330.6	15763.4	16119.1	234.029	16071	0.0145622
P49720	Proteasome subunit beta type-3	45151.4	46161.9	46772.5	668.486	46028.6	0.0145233
P49721	Proteasome subunit beta type-2	52216.3	30442.3	62266.7	13282.8	48308.4	0.274959				36803.9	32812.6
P49773	Histidine triad nucleotide-binding protein 1	48453.1	44653.3	50596.5	2457.53	47901	0.0513044
P49788	Retinoic acid receptor responder protein 1	357408	338173	358534	9344.01	351372	0.0265929
P49902	Cytosolic purine 5'-nucleotidase	36249.5	33715.3	37634.2	1622.67	35866.3	0.0452421
P49903	Selenide, water dikinase 1	3412.59	3365.85	3404.53	20.4036	3394.32	0.00601111
P50225;P50226	Sulfotransferase 1A1;Sulfotransferase 1A2	14275.1	21106.3	14435.4	3183.11	16605.6	0.191689
P50238	Cysteine-rich protein 1	638025	604461	632625	14715.5	625037	0.0235434
P50395	Rab GDP dissociation inhibitor beta	203373	212755	177895	14728.4	198008	0.0743828
P50452	Serpin B8	183421	160590	168692	9450.7	170901	0.0552991
P50502	Hsc70-interacting protein	50439	48686.2	52585.7	1594.67	50570.3	0.0315337
P50552	Vasodilator-stimulated phosphoprotein	18604.3	25196.9	18104.9	3231.91	20635.4	0.15662
P50570	Dynamin-2	116899	108953	92040.7	10365.9	105964	0.0978249
P50583	Bis(5'-nucleosyl)-tetraphosphatase [asymmetrical]	10990.3	18535.4	14595.3	3081.3	14707	0.209513				19645.3	18703.2
P50851	Lipopolysaccharide-responsive and beige-like anchor protein	5895.35	7482.53	9787.08	1597.76	7721.65	0.20692				4905.04	5706.5
P50897	Palmitoyl-protein thioesterase 1	9724.14	8233.4	9127.57	612.62	9028.37	0.067855
P50990	T-complex protein 1 subunit theta	124003	144879	123812	9886.46	130898	0.075528
P50991	T-complex protein 1 subunit delta	86285.3	139900	145681	26741.1	123955	0.215732				152093	101970
P50995	Annexin A11	158700	158036	157709	412.267	158148	0.00260684
P51149	Ras-related protein Rab-7a	84898.9	84520.1	84944.7	190.324	84787.9	0.0022447
P51452	Dual specificity protein phosphatase 3	11579.8	22279.6	11380.1	5091.66	15079.9	0.337646				13559.9	14027.9
P51570	Galactokinase	15407.1	16179.8	19761.6	1897.01	17116.2	0.110831
P51665	26S proteasome non-ATPase regulatory subunit 7	14414.6	16521.5	13693.1	1199.96	14876.4	0.0806621
P51812	Ribosomal protein S6 kinase alpha-3	42610.5	38028.7	41080.4	1904.58	40573.2	0.0469419
P51858	Hepatoma-derived growth factor	6178.84	10298.9	18074.5	4932.25	11517.4	0.428242				16424.1	21342
P51884	Lumican	34041.1	28815.4	27488.5	2828.56	30115	0.0939253
P51991	Heterogeneous nuclear ribonucleoprotein A3	12890.1	17855.6	25754.5	5297.17	18833.4	0.281264				13431.4	26055.4
P52209	6-phosphogluconate dehydrogenase, decarboxylating	1.40435e+06	1.3763e+06	1.40377e+06	13087.1	1.39481e+06	0.0093827
P52272	Heterogeneous nuclear ribonucleoprotein M	30367.7	30027	26690.4	1659.03	29028.4	0.0571522
P52565	Rho GDP-dissociation inhibitor 1	160500	174596	182865	9232.81	172654	0.0534759
P52566	Rho GDP-dissociation inhibitor 2	110346	106344	124386	7736.16	113692	0.0680448
P52630	Signal transducer and activator of transcription 2	23051.6	29654.4	25792.8	2708.49	26166.3	0.103511
P52788	Spermine synthase	53400.9	53356.3	11296	19837.9	39351.1	0.504126				31339.8	31544.6
P52895	Aldo-keto reductase family 1 member C2	149357	187417	187314	17917.5	174696	0.102564
P52907	F-actin-capping protein subunit alpha-1	212932	233544	293070	33977.7	246515	0.137832
P52943	Cysteine-rich protein 2	66821.7	60834.8	62585.9	2513.32	63414.1	0.0396334
P53004	Biliverdin reductase A	32932.7	29984	32962.9	1397.21	31959.8	0.0437177
P53041	Serine/threonine-protein phosphatase 5	14910	21516.4	22751.6	3442.58	19726	0.17452
P53396	ATP-citrate synthase	Filtered	Filtered	14833.2	0	14833.2	0
P53582	Methionine aminopeptidase 1	11982.3	5975.58	3089.41	3704.27	7015.77	0.527992				1903.36	6339.31
P53609	Geranylgeranyl transferase type-1 subunit beta	Filtered	3854.13	13685.7	4915.78	8769.92	0.560528				14536	Filtered
P53611	Geranylgeranyl transferase type-2 subunit beta	22036.8	14385.2	16847	3189.23	17756.3	0.179611
P53618	Coatomer subunit beta	59032	42968.9	49373.1	6602.45	50458	0.13085
P53621	Coatomer subunit alpha	36178.3	44719.4	40194.9	3488.94	40364.2	0.0864366
P53634	Dipeptidyl peptidase 1	39463.3	34747.8	50294.9	6508.74	41502	0.15683
P53999	Activated RNA polymerase II transcriptional coactivator p15	43610.6	27681.5	45365.2	7954.95	38885.8	0.204572				22897.1	50889
P54136	Arginine--tRNA ligase, cytoplasmic	39773.2	35751.6	39887.4	1923.28	38470.7	0.0499933
P54577	Tyrosine--tRNA ligase, cytoplasmic	30102.4	26034	19224.8	4487.5	25120.4	0.17864
P54578	Ubiquitin carboxyl-terminal hydrolase 14	21473.6	24510.5	21697.4	1381.88	22560.5	0.0612521
P54619	5'-AMP-activated protein kinase subunit gamma-1	1878.44	4140.66	Filtered	1131.11	3009.55	0.37584				Filtered	801.867
P54725	UV excision repair protein RAD23 homolog A	48012.1	43367.1	24323.7	10248.9	38567.6	0.265739				43129.1	49294.3
P54727	UV excision repair protein RAD23 homolog B	65924.6	58205.2	64852.5	3414.44	62994.1	0.0542026
P54802	Alpha-N-acetylglucosaminidase	15849.9	16090.1	15490.6	246.356	15810.2	0.0155821
P54819	Adenylate kinase 2, mitochondrial	18734.8	36858.5	19916.8	8279.06	25170.1	0.328925				17190.2	23136.9
P54920	Alpha-soluble NSF attachment protein	43218.6	52478.1	47554.9	3782.73	47750.5	0.0792186
P55010	Eukaryotic translation initiation factor 5	36365.3	52845.8	42938	6773.89	44049.7	0.153778
P55011	Solute carrier family 12 member 2	21705.5	20312.5	17605.1	1702.38	19874.4	0.0856572
P55058	Phospholipid transfer protein	797443	841326	943915	61377	860895	0.0712944
P55060	Exportin-2	5780.29	3405.77	7037.97	1506.02	5408.01	0.27848				6656.28	2760.98
P55072	Transitional endoplasmic reticulum ATPase	273720	286621	301077	11174.1	287139	0.0389153
P55209	Nucleosome assembly protein 1-like 1	73020.1	67423.7	55420.6	7341.94	65288.1	0.112455
P55210	Caspase-7	8536.38	17174.7	16846.3	3996.99	14185.8	0.28176				13181.1	27187.7
P55212	Caspase-6	28749.7	56136.6	70429.5	17293.3	51772	0.334029				65629.4	56020.7
P55263	Adenosine kinase	144379	140816	120971	10298.1	135389	0.0760634
P55327	Tumor protein D52	25381.6	31465.5	23976.6	3250.16	26941.2	0.120639
P55735	Protein SEC13 homolog	11421.3	6968.34	10595	1934.04	9661.56	0.200179				5683.82	9609.07
P55786	Puromycin-sensitive aminopeptidase	117919	146801	135098	11861.6	133272	0.0890027
P55854;P61956;Q6EEV6	Small ubiquitin-related modifier 3;Small ubiquitin-related modifier 2;Small ubiquitin-related modifier 4	86263.9	86391.4	91698.6	2532.41	88118	0.0287388
P55884	Eukaryotic translation initiation factor 3 subunit B	38400.9	39954.4	42714.8	1783.98	40356.7	0.0442052
P55957	BH3-interacting domain death agonist	18297.8	8815.88	8938.82	4441.14	12017.5	0.369555				11069	13467
P56192	Methionine--tRNA ligase, cytoplasmic	26025	18855.5	23458.9	2966.06	22779.8	0.130206
P56537	Eukaryotic translation initiation factor 6	23917.8	24268.5	28251.5	1965.51	25479.3	0.0771414
P57735	Ras-related protein Rab-25	126518	119820	121835	2805.89	122724	0.0228633
P58107	Epiplakin	9450.53	19208.5	10047.5	4465.88	12902.2	0.346134				6525.99	11933.7
P58499	Protein FAM3B	17970.8	40087.4	40114.6	10432.3	32724.3	0.318794				67630.3	23475.9
P58546	Myotrophin	64820.6	80135.6	81170.9	7475.52	75375.7	0.0991768
P59665;P59666	Neutrophil defensin 1;Neutrophil defensin 3	1.41604e+06	1.17576e+06	1.13617e+06	123663	1.24266e+06	0.0995148
P59998	Actin-related protein 2/3 complex subunit 4	368443	345788	349033	10002.9	354421	0.0282231
P60174	Triosephosphate isomerase	712131	701116	710290	4817.32	707846	0.00680561
P60228	Eukaryotic translation initiation factor 3 subunit E	13631.5	17865.5	18789.5	2245.61	16762.2	0.133969
P60660	Myosin light polypeptide 6	506153	504871	468933	17251.4	493319	0.03497
P60709;P63261	Actin, cytoplasmic 1;Actin, cytoplasmic 2	10194484	10698220	10197934	236654	10363546	0.0228353
P60842	Eukaryotic initiation factor 4A-I	59793.9	53223.2	58875.6	2905.33	57297.6	0.050706
P60866	40S ribosomal protein S20	56859.3	41104	50981.9	6500.85	49648.4	0.130938
P60900	Proteasome subunit alpha type-6	274094	245833	242775	14098.5	254234	0.0554549
P60903	Protein S100-A10	211214	193726	192450	8560.38	199130	0.0429889
P60953	Cell division control protein 42 homolog	83980.9	85115.3	75280.1	4393.42	81458.8	0.0539343
P60981	Destrin	188486	168410	187447	9229.13	181448	0.0508638
P61019	Ras-related protein Rab-2A	119239	116548	116774	1219.01	117520	0.0103728
P61026	Ras-related protein Rab-10	18732.6	54291.2	38155.2	14537.4	37059.7	0.39227				13240.7	37344.5
P61077;P62837	Ubiquitin-conjugating enzyme E2 D3;Ubiquitin-conjugating enzyme E2 D2	140412	122522	72996.3	28514.5	111977	0.254647				130010	115044
P61086	Ubiquitin-conjugating enzyme E2 K	27842.6	17479.4	24734.2	4342.16	23352.1	0.185943
P61088	Ubiquitin-conjugating enzyme E2 N	117204	112922	106810	4265.21	112312	0.0379764
P61106	Ras-related protein Rab-14	25034.2	21283.6	27347.1	2498.53	24555	0.101753
P61158	Actin-related protein 3	120825	132759	188346	29423	147310	0.199735
P61160	Actin-related protein 2	92265.9	103003	95142.6	4537.96	96803.7	0.046878
P61163	Alpha-centractin	Filtered	6547.88	15946.3	4699.19	11247.1	0.417814				19769.7	Filtered
P61201	COP9 signalosome complex subunit 2	11997.1	8510.76	10868.2	1452.46	10458.7	0.138876
P61204;P84077	ADP-ribosylation factor 3;ADP-ribosylation factor 1	266604	217448	206110	26256.1	230054	0.11413
P61224	Ras-related protein Rap-1b	72758.6	63943.3	65894.3	3780.59	67532.1	0.0559821
P61247	40S ribosomal protein S3a	18913.9	38165.3	43047	10418.2	33375.4	0.312153				47160.1	47952.5
P61254;Q9UNX3	60S ribosomal protein L26;60S ribosomal protein L26-like 1	38323.6	39031.6	45837.6	3387.63	41064.2	0.0824959
P61313	60S ribosomal protein L15	21512.8	18960.8	18289.1	1388.69	19587.6	0.0708966
P61353	60S ribosomal protein L27	179037	58786.3	173586	55446.7	137136	0.404317				135982	47582.3
P61457	Pterin-4-alpha-carbinolamine dehydratase	32062.9	25890.3	37126.6	4594.64	31693.3	0.144972
P61586	Transforming protein RhoA	169581	184044	171791	6361.39	175139	0.036322
P61604	10 kDa heat shock protein, mitochondrial	40618.4	43700.9	36467.2	2963.86	40262.2	0.0736141
P61626	Lysozyme C	298981824	280887424	287052288	7.51093e+06	2.88974e+08	0.0259917
P61758	Prefoldin subunit 3	25787.8	19366.3	18816.3	3164.74	21323.5	0.148416
P61769	Beta-2-microglobulin	595792	802946	616172	93221.9	671637	0.138798
P61916	Epididymal secretory protein E1	216079	209511	295344	39006.2	240311	0.162315
P61923	Coatomer subunit zeta-1	26831.4	47991.9	19811.5	11977.7	31544.9	0.379703				Filtered	14094.1
P61960	Ubiquitin-fold modifier 1	67918.6	69731.5	123044	25570	86898.2	0.294252				78249.8	80894.5
P61970	Nuclear transport factor 2	96644.2	85318.3	81468.3	6441.25	87810.3	0.0733542
P61978	Heterogeneous nuclear ribonucleoprotein K	106187	111929	108038	2392.96	108718	0.0220107
P61981	14-3-3 protein gamma	297957	137605	207637	65637.6	214400	0.306146				220784	219362
P62081	40S ribosomal protein S7	21060.4	27170.4	19279.5	3379.16	22503.4	0.150162
P62136	Serine/threonine-protein phosphatase PP1-alpha catalytic subunit	117060	135491	115984	8952.73	122845	0.0728782
P62140	Serine/threonine-protein phosphatase PP1-beta catalytic subunit	70105.8	79039	79502.1	4324.41	76215.6	0.0567392
P62158	Calmodulin	550183	570985	548144	10320.5	556438	0.0185474
P62191	26S protease regulatory subunit 4	29591.8	30219.6	16860.9	6154.7	25557.4	0.240818				27028.1	29090
P62195	26S protease regulatory subunit 8	15286	22852.1	18184.2	3116.87	18774.1	0.16602
P62241	40S ribosomal protein S8	73701.7	68304.4	62524.6	4563.92	68176.9	0.0669423
P62244	40S ribosomal protein S15a	46500.5	40927.8	60010.7	8012.09	49146.3	0.163025
P62249	40S ribosomal protein S16	73533.4	65353.8	68714.2	3356.99	69200.5	0.0485111
P62258	14-3-3 protein epsilon	667182	538300	528076	63303.2	577853	0.109549
P62263	40S ribosomal protein S14	19870.5	37242.4	17504	8800.19	24872.3	0.353815				36841.9	32615.3
P62266	40S ribosomal protein S23	29730.7	33649.2	33736.6	1868.16	32372.2	0.0577086
P62269	40S ribosomal protein S18	96378.8	90524.4	70042.6	11290.9	85648.6	0.131829
P62304	Small nuclear ribonucleoprotein E	11391.4	34198.8	16751.8	9737.13	20780.7	0.468567				22497.8	23393.9
P62328	Thymosin beta-4	126077	132235	100969	13523.2	119760	0.112919
P62330	ADP-ribosylation factor 6	19543.5	28327.3	16475	5022.69	21448.6	0.234173				20405.6	13175.4
P62333	26S protease regulatory subunit 10B	20055.2	26830.3	29878.7	4105.49	25588	0.160446
P62424	60S ribosomal protein L7a	27212.4	22856.6	26051.4	1841.71	25373.5	0.0725842
P62495	Eukaryotic peptide chain release factor subunit 1	15813	14067.1	9422.26	2697.01	13100.8	0.205866				11519.2	14583.7
P62701	40S ribosomal protein S4, X isoform	32933.6	25267.2	22483.9	4418.62	26894.9	0.164292
P62714	Serine/threonine-protein phosphatase 2A catalytic subunit beta isoform	116993	109109	104349	5214.06	110150	0.0473358
P62753	40S ribosomal protein S6	51845.6	41522	40199.3	5206.41	44522.3	0.116939
P62805	Histone H4	67741.3	53827.4	129640	32952	83736.1	0.393522				72446.7	134347
P62826	GTP-binding nuclear protein Ran	74329.3	64687.8	62725.1	5071.37	67247.4	0.0754136
P62851	40S ribosomal protein S25	83480.1	74793.9	62792.6	8481.71	73688.8	0.115102
P62879	Guanine nucleotide-binding protein G(I)/G(S)/G(T) subunit beta-2	16061.2	16064.6	11986.3	1921.71	14704	0.130693
P62888	60S ribosomal protein L30	65327.1	67508.2	82680.5	7717.92	71838.6	0.107434
P62906	60S ribosomal protein L10a	24402.6	30161.4	30728.4	2857.75	28430.8	0.100516
P62910	60S ribosomal protein L32	9594.55	16262.9	12214	2743.13	12690.5	0.216156				11287.8	10614.1
P62913	60S ribosomal protein L11	51230.3	55320.6	47279.7	3282.86	51276.9	0.0640222
P62917	60S ribosomal protein L8	8281.9	11520.9	9952.37	1322.55	9918.4	0.133343
P62937	Peptidyl-prolyl cis-trans isomerase A	1142266	1.13704e+06	1.18485e+06	21412.9	1.15472e+06	0.0185438
P62942	Peptidyl-prolyl cis-trans isomerase FKBP1A	248700	240689	249693	4030.86	246361	0.0163616
P62979	Ubiquitin-40S ribosomal protein S27a	603838	435079	334333	111187	457750	0.242898				347819	305144
P62993	Growth factor receptor-bound protein 2	18171	Filtered	9275.92	4447.53	13723.4	0.324083				17211.4	Filtered
P63000	Ras-related C3 botulinum toxin substrate 1	5.03433e+06	5.11494e+06	67162	2.36078e+06	3.40548e+06	0.693229				57756.2	153373
P63010	AP-2 complex subunit beta	29313.6	40426.3	41125.1	5410.79	36955	0.146416
P63104	14-3-3 protein zeta/delta	1.20626e+06	1.32348e+06	1.33024e+06	56918.3	1.28666e+06	0.0442372
P63151	Serine/threonine-protein phosphatase 2A 55 kDa regulatory subunit B alpha isoform	23525.7	62781.2	39837.7	16102	42048.2	0.382942				30427.3	30236.4
P63167;Q96FJ2	Dynein light chain 1, cytoplasmic;Dynein light chain 2, cytoplasmic	82633	50880.6	56141.3	13895.3	63218.3	0.219798				57858.5	44831.2
P63173	60S ribosomal protein L38	37649.4	34238.7	32283.7	2217.27	34723.9	0.0638542
P63208	S-phase kinase-associated protein 1	86462.6	90992.5	62556.9	12474.8	80004	0.155927
P63220	40S ribosomal protein S21	52195.8	31413.3	48058.5	8982.05	43889.2	0.204653				58744.2	58831.4
P63241	Eukaryotic translation initiation factor 5A-1	149305	124437	125997	11373.3	133246	0.0853555
P63244	Guanine nucleotide-binding protein subunit beta-2-like 1	121592	125818	114163	4817.91	120524	0.0399746
P67809	Nuclease-sensitive element-binding protein 1	25518.2	19950.7	18602.2	2993.45	21357.1	0.140162
P67870	Casein kinase II subunit beta	11428.2	9102.08	7336.7	1675.55	9288.98	0.18038
P67936	Tropomyosin alpha-4 chain	55073	43784.7	38710.6	6838.62	45856.1	0.149132
P68032;P68133	Actin, alpha cardiac muscle 1;Actin, alpha skeletal muscle	726570	760145	808734	33729.4	765149	0.044082
P68036	Ubiquitin-conjugating enzyme E2 L3	114396	105524	88387	10795.3	102769	0.105045
P68104	Elongation factor 1-alpha 1	3448789	3371243	3634049	110253	3.48469e+06	0.0316392
P68366	Tubulin alpha-4A chain	308887	317755	314668	3675.53	313770	0.0117141
P68371	Tubulin beta-4B chain	638479	521929	978625	193750	713011	0.271736				642356	631333
P68400	Casein kinase II subunit alpha	6630	11731.8	5803.96	2621.51	8055.27	0.325441				5962.01	Filtered
P68402	Platelet-activating factor acetylhydrolase IB subunit beta	213508	156461	94317.6	48673.9	154762	0.314508				222498	185811
P68871	Hemoglobin subunit beta	71608.5	79411.5	91144	8028.92	80721.3	0.0994647
P69905	Hemoglobin subunit alpha	92415.8	117089	82347.3	14595.2	97284.2	0.150026
P78371	T-complex protein 1 subunit beta	119661	114234	103375	6771.02	112424	0.0602277
P78417	Glutathione S-transferase omega-1	327685	334566	280488	24035.7	314246	0.0764868
P80188	Neutrophil gelatinase-associated lipocalin	1.63571e+06	1571671	1.66144e+06	37744.1	1.62294e+06	0.0232566
P80217	Interferon-induced 35 kDa protein	Filtered	22774	29871.1	3548.58	26322.5	0.134811
P80303	Nucleobindin-2	584204	644953	520467	50826.1	583208	0.0871492
P80419	Ig heavy chain V-III region GAR	93955.2	111801	80670.2	12754.3	95475.3	0.133587
P80511	Protein S100-A12	16666.5	29220.9	28745.3	5809.34	24877.6	0.233517				33680.8	Filtered
P80748	Ig lambda chain V-III region LOI	2.05333e+06	2.01754e+06	1.96087e+06	38067.9	2010581	0.0189338
P81605	Dermcidin	106295	73662.2	220213	62821.7	133390	0.470963				206314	135220
P83731	60S ribosomal protein L24	17076.8	16100.5	14450.8	1083.75	15876	0.0682632
P83916	Chromobox protein homolog 1	Filtered	6837.98	2056.71	2390.64	4447.34	0.537543				7698.37	Filtered
P98088	Mucin-5AC (Fragments)	261431	293153	284699	13412.9	279761	0.047944
P98160	Basement membrane-specific heparan sulfate proteoglycan core protein	693500	751984	694297	27383.7	713260	0.0383924
P98179	Putative RNA-binding protein 3	Filtered	19803.8	47318.1	13757.1	33560.9	0.409915				39074	36675.7
P99999	Cytochrome c	37179.3	34340.1	40208	2395.97	37242.5	0.0643344
Q00169	Phosphatidylinositol transfer protein alpha isoform	14620.3	14918.2	13810.3	468.109	14449.6	0.032396
Q00577	Transcriptional activator protein Pur-alpha	15157.3	22671.5	17535.1	3135.83	18454.6	0.169921
Q00610	Clathrin heavy chain 1	144484	123007	125273	9634.96	130921	0.0735934
Q00653	Nuclear factor NF-kappa-B p100 subunit	1189894	1.6753e+06	2177173	403074	1.68079e+06	0.239812				600091	2.5288e+06
Q00796	Sorbitol dehydrogenase	349791	310803	356319	20095	338971	0.0592824
Q00839	Heterogeneous nuclear ribonucleoprotein U	41095.6	43453.2	51783	4584.57	45444	0.100884
Q01105	Protein SET	92047.2	102938	98104.3	4455.59	97696.6	0.0456064
Q01432	AMP deaminase 3	27341.9	Filtered	14797.6	6272.16	21069.7	0.297686				13958.1	10991.8
Q01459	Di-N-acetylchitobiase	34546	35950.8	30333.5	2386.85	33610.1	0.0710158
Q01469	Fatty acid-binding protein, epidermal	1.26856e+06	1.39368e+06	1253971	62702.6	1.3054e+06	0.0480331
Q01518	Adenylyl cyclase-associated protein 1	208169	221641	232839	10085.6	220883	0.0456605
Q01813	6-phosphofructokinase type C	33428.2	39612.9	36441.8	2525.17	36494.3	0.0691936
Q02487	Desmocollin-2	16863.6	16925	Filtered	30.6982	16894.3	0.00181708
Q02543	60S ribosomal protein L18a	22033.2	30740.5	35121	5439.51	29298.2	0.18566
Q02750	Dual specificity mitogen-activated protein kinase kinase 1	3743.25	6281.1	52648.4	22479.8	20890.9	1.07606				42554.7	39670.2
Q02790	Peptidyl-prolyl cis-trans isomerase FKBP4	26647.8	27859.8	26150.2	717.983	26885.9	0.0267048
Q02809	Procollagen-lysine,2-oxoglutarate 5-dioxygenase 1	42595.5	35808.7	42173.5	3104.65	40192.6	0.0772443
Q02818	Nucleobindin-1	181605	190202	174446	6441.25	182084	0.0353751
Q02878	60S ribosomal protein L6	28927.8	31417.2	29038.6	1148.29	29794.6	0.0385403
Q03113;Q14344	Guanine nucleotide-binding protein subunit alpha-12;Guanine nucleotide-binding protein subunit alpha-13	60073.7	35947.3	47761.4	9850.24	47927.4	0.205524				49870.8	47434.3
Q03154	Aminoacylase-1	14433.6	18858.6	15127.8	1943.1	16140	0.12039
Q03252	Lamin-B2	15144.1	15234.9	23017.4	3690.29	17798.8	0.207334				10439.5	Filtered
Q03591	Complement factor H-related protein 1	25146.3	24343	24518.9	344.783	24669.4	0.0139761
Q04206	Transcription factor p65	17287.8	21876.4	15403.4	2718.37	18189.2	0.14945
Q04446	1,4-alpha-glucan-branching enzyme	26196.2	24179.1	12727.7	5931.13	21034.3	0.281974				15907.5	26199.6
Q04609	Glutamate carboxypeptidase 2	18349.1	19759	17044.5	1108.47	18384.2	0.0602948
Q04637	Eukaryotic translation initiation factor 4 gamma 1	9488.3	12695.3	11931.9	1367.85	11371.8	0.120284
Q04760	Lactoylglutathione lyase	176532	159422	179730	8915.91	171895	0.0518684
Q04828	Aldo-keto reductase family 1 member C1	380804	549599	498350	70660.1	476251	0.148367
Q04917	14-3-3 protein eta	25080	Filtered	29902.6	2411.29	27491.3	0.0877109
Q06210	Glucosamine--fructose-6-phosphate aminotransferase [isomerizing] 1	154264	161902	141948	8220.47	152705	0.0538325
Q06323	Proteasome activator complex subunit 1	479139	436269	470039	18441.9	461816	0.0399335
Q06828	Fibromodulin	63998.6	65761.7	68544.2	1871.2	66101.5	0.0283079
Q06830	Peroxiredoxin-1	4.14834e+06	4.49215e+06	4300988	140655	4.31383e+06	0.0326055
Q07020	60S ribosomal protein L18	57814.3	55732.6	54732.9	1283.57	56093.2	0.0228828
Q07021	Complement component 1 Q subcomponent-binding protein, mitochondrial	16171.2	11103.5	14252.4	2089.08	13842.4	0.150919
Q07654	Trefoil factor 3	18272.2	32056	Filtered	6891.89	25164.1	0.273878				25930.7	23084.8
Q07812	Apoptosis regulator BAX	31937.2	32703.9	Filtered	383.352	32320.6	0.0118609
Q07866	Kinesin light chain 1	9662.64	6555	7628.63	1288.73	7948.76	0.162129
Q07955	Serine/arginine-rich splicing factor 1	36380.2	37924.8	51281.4	6690.23	41862.1	0.159816
Q07960	Rho GTPase-activating protein 1	68720.7	80297.9	69357.7	5313.75	72792.1	0.072999
Q08209	Serine/threonine-protein phosphatase 2B catalytic subunit alpha isoform	26804.6	54025.5	41081	11117.3	40637	0.273576				35332.5	Filtered
Q08211	ATP-dependent RNA helicase A	97801.7	90447.4	50424.7	20817.9	79557.9	0.26167				142422	8433.2
Q08257	Quinone oxidoreductase	89177.4	94908.7	83565.5	4630.91	89217.2	0.051906
Q08345	Epithelial discoidin domain-containing receptor 1	25355.1	16548.5	20387.7	3605.1	20763.7	0.173625
Q08380	Galectin-3-binding protein	693621	794915	789950	46624	759495	0.0613881
Q08623	Pseudouridine-5'-monophosphatase	25630.9	23297.4	24678.7	958.033	24535.7	0.0390466
Q09666	Neuroblast differentiation-associated protein AHNAK	202026	205297	205637	1627.99	204320	0.00796786
Q10567	AP-1 complex subunit beta-1	26860.9	30609.8	41227.4	6084.47	32899.4	0.184942
Q11201	CMP-N-acetylneuraminate-beta-galactosamide-alpha-2,3-sialyltransferase 1	31386.4	32531.5	30795.5	720.665	31571.1	0.0228267
Q12765	Secernin-1	33347.8	27346.4	30301.7	2450.15	30332	0.0807779
Q12792	Twinfilin-1	72849.2	77123.1	67680.4	3860.72	72550.9	0.0532139
Q12805	EGF-containing fibulin-like extracellular matrix protein 1	42273.9	32341.7	18237.2	9862.08	30950.9	0.318636				34628.2	78890
Q12882	Dihydropyrimidine dehydrogenase [NADP(+)]	17438.4	15847.8	17828.2	856.619	17038.1	0.0502766
Q12904	Aminoacyl tRNA synthase complex-interacting multifunctional protein 1	984765	274461	43557.2	400516	434261	0.922294				21429	35581.5
Q12905	Interleukin enhancer-binding factor 2	31884.7	30725.8	21026	4868.71	27878.8	0.174638
Q12906	Interleukin enhancer-binding factor 3	31080.5	18873	43256.5	9954.49	31070	0.320389				36216.2	28023.1
Q13045	Protein flightless-1 homolog	25310.6	14338.8	11532.3	5945.1	17060.6	0.34847				19664.5	18474.9
Q13057	Bifunctional coenzyme A synthase	53431.8	28206.2	20785.3	13972.9	34141.1	0.409271				16534.2	35502
Q13098	COP9 signalosome complex subunit 1	4736.66	8271.88	7163.9	1476.37	6724.15	0.219562				8366.65	9073.54
Q13126	S-methyl-5'-thioadenosine phosphorylase	94349.1	123006	88233.9	15157.1	101863	0.1488
Q13131	5'-AMP-activated protein kinase catalytic subunit alpha-1	5765.73	12752.2	9648.69	2858.12	9388.87	0.304416				Filtered	5447.1
Q13148	TAR DNA-binding protein 43	9124.35	9589.96	8353.16	510.034	9022.49	0.0565292
Q13151	Heterogeneous nuclear ribonucleoprotein A0	66508.8	69805.3	43223.9	11830.4	59846	0.19768
Q13162	Peroxiredoxin-4	46826.6	43386.8	43625.4	1568.34	44613	0.0351543
Q13177	Serine/threonine-protein kinase PAK 2	10354.8	14451.3	13050	1699.98	12618.7	0.134719
Q13200	26S proteasome non-ATPase regulatory subunit 2	24197.4	24689.5	28011.4	1693.9	25632.8	0.0660832
Q13217	DnaJ homolog subfamily C member 3	205182	208699	210558	2229.24	208146	0.01071
Q13228	Selenium-binding protein 1	1.26318e+06	1.38009e+06	1.20845e+06	71587.6	1.28391e+06	0.0557577
Q13232	Nucleoside diphosphate kinase 3	25297.5	34424.2	39106.5	5733.99	32942.8	0.174059
Q13347	Eukaryotic translation initiation factor 3 subunit I	11387.5	14427.9	20867.5	3952.22	15561	0.253983				12072.7	25224.5
Q13404	Ubiquitin-conjugating enzyme E2 variant 1	134437	126962	94747.2	17220.7	118715	0.145059
Q13409	Cytoplasmic dynein 1 intermediate chain 2	17423	17607.6	15309.4	1042.58	16780	0.0621321
Q13421	Mesothelin	3.08819e+06	3.41291e+06	2.77699e+06	259630	3.0927e+06	0.0839495
Q13442	28 kDa heat- and acid-stable phosphoprotein	14182.4	28298.7	28302.7	6655.44	23594.6	0.282075				31697.1	20799.2
Q13492	Phosphatidylinositol-binding clathrin assembly protein	Filtered	Filtered	10197.9	0	10197.9	0
Q13510	Acid ceramidase	89485.6	75815.4	108108	13234.9	91136.3	0.145221
Q13561	Dynactin subunit 2	72611.4	88892.9	98617.2	10728.7	86707.2	0.123735
Q13564	NEDD8-activating enzyme E1 regulatory subunit	10510.3	Filtered	Filtered	0	10510.3	0
Q13576	Ras GTPase-activating-like protein IQGAP2	113338	109989	110170	1537.97	111166	0.0138349
Q13596	Sorting nexin-1	28951.3	22034.2	22400.6	3177.88	24462	0.129911
Q13617	Cullin-2	4615.84	2933.3	7294.17	1795.72	4947.77	0.362935				7421.24	Filtered
Q13630	GDP-L-fucose synthase	150431	168434	152328	8076.49	157064	0.0514215
Q13740	CD166 antigen	35809.3	29612.5	31727.9	2571.9	32383.2	0.0794208
Q13765	Nascent polypeptide-associated complex subunit alpha	29903	25093.8	17282.3	5200.75	24093	0.215862				30759.8	22156.7
Q13813	Spectrin alpha chain, non-erythrocytic 1	25605.7	27215.2	24136.5	1257.32	25652.5	0.0490137
Q13838	Spliceosome RNA helicase DDX39B	74258.7	83376.9	68074	6285.56	75236.5	0.083544
Q13867	Bleomycin hydrolase	34825.4	39791.7	95605.1	27556	56740.8	0.485646				32574.9	29999.9
Q13885;Q9BVA1	Tubulin beta-2A chain;Tubulin beta-2B chain	219933	188687	203645	12760.2	204088	0.062523
Q13938	Calcyphosin	208515	221897	228112	8176.7	219508	0.0372501
Q14011	Cold-inducible RNA-binding protein	55813.5	49294.5	54056.7	2754.04	53054.9	0.0519094
Q14019	Coactosin-like protein	Filtered	20207.2	18024.5	1091.39	19115.9	0.0570936
Q14050	Collagen alpha-3(IX) chain	59397.4	32337.7	68372.9	15316.4	53369.4	0.286988				70022.3	172041
Q14103	Heterogeneous nuclear ribonucleoprotein D0	82406.4	87359.9	87616.2	2397.82	85794.2	0.0279486
Q14116	Interleukin-18	Filtered	Filtered	11831.6	0	11831.6	0
Q14118	Dystroglycan	51687.8	25790.2	54132	12823.2	43870	0.2923				51190	45341.9
Q14126	Desmoglein-2	28688.9	26741.1	24996.9	1508.04	26809	0.0562513
Q14134	Tripartite motif-containing protein 29	37404.9	38202.6	32521.9	2511.1	36043.2	0.0696692
Q14152	Eukaryotic translation initiation factor 3 subunit A	20128.5	23614.2	18757.8	2044.32	20833.5	0.0981268
Q14160;Q9BTT6	Protein scribble homolog;Leucine-rich repeat-containing protein 1	Filtered	7281.47	3944.01	1668.73	5612.74	0.297311				2484.78	Filtered
Q14166	Tubulin--tyrosine ligase-like protein 12	33733.8	35462.3	31909.3	1450.69	33701.8	0.043045
Q14203	Dynactin subunit 1	21831.2	22027.4	25731.4	1794.1	23196.7	0.0773428
Q14204	Cytoplasmic dynein 1 heavy chain 1	44210.7	44777.1	40708.9	1799.18	43232.3	0.0416166
Q14240	Eukaryotic initiation factor 4A-II	193000	227210	210454	13967.2	210221	0.0664407
Q14247	Src substrate cortactin	150919	156473	155270	2385.64	154220	0.015469
Q14258	E3 ubiquitin/ISG15 ligase TRIM25	14372.7	11583.2	9468.29	2008.53	11808.1	0.170098
Q14376	UDP-glucose 4-epimerase	72370.2	60072.7	68266.9	5112.23	66903.3	0.0764122
Q14435	Polypeptide N-acetylgalactosaminyltransferase 3	17952	16715.4	16206.5	732.963	16958	0.0432223
Q14508	WAP four-disulfide core domain protein 2	365265	430274	419521	28451.5	405020	0.0702472
Q14515	SPARC-like protein 1	166257	174358	173511	3635.83	171376	0.0212156
Q14624	Inter-alpha-trypsin inhibitor heavy chain H4	77936.7	75941.9	74496.2	1410.51	76124.9	0.0185289
Q14651	Plastin-1	24453.9	30334.6	22152.6	3445.16	25647	0.13433
Q14697	Neutral alpha-glucosidase AB	108244	104294	106309	1612.78	106283	0.0151745
Q14738	Serine/threonine-protein phosphatase 2A 56 kDa regulatory subunit delta isoform	5761.33	1523.69	9599.23	3298.17	5628.08	0.58602				7741.67	8857.85
Q14764	Major vault protein	75412.6	61422.1	67450.9	5729.7	68095.2	0.0841425
Q14847	LIM and SH3 domain protein 1	102721	95376.5	123186	11766.8	107095	0.109873
Q14894	Thiomorpholine-carboxylate dehydrogenase	24597.6	44699	42380.9	8979.51	37225.9	0.241217				36576.4	36810.2
Q14914	Prostaglandin reductase 1	142999	78993.7	69963.8	32510.7	97319	0.334063				68207.8	67088.1
Q14974	Importin subunit beta-1	51203.7	53713.6	47689.2	2470.81	50868.8	0.0485723
Q14C86	GTPase-activating protein and VPS9 domain-containing protein 1	17663.5	14115.7	9425.17	3374.03	13734.8	0.245656				39896.8	11210.9
Q15008	26S proteasome non-ATPase regulatory subunit 6	35052.8	30478.9	51435.2	8996.71	38989	0.23075				53136.8	37843.3
Q15019	Septin-2	31434.5	33798.9	32936.6	977.008	32723.3	0.0298566
Q15046	Lysine--tRNA ligase	21543.5	22341.7	29615.6	3631.74	24500.3	0.148233
Q15084	Protein disulfide-isomerase A6	80587.9	125176	101047	18223.4	102270	0.178189
Q15102	Platelet-activating factor acetylhydrolase IB subunit gamma	55485.6	55815.8	46502.1	4314.8	52601.2	0.0820286
Q15121	Astrocytic phosphoprotein PEA-15	32988.3	45381.3	49649.8	7066.46	42673.2	0.165595
Q15149	Plectin	20114.1	18366.2	22572.5	1725.39	20350.9	0.0847817
Q15181	Inorganic pyrophosphatase	298577	795270	1.03894e+06	308079	710929	0.433347				967709	161348
Q15185	Prostaglandin E synthase 3	55110.6	66499.6	100126	19110.2	73912	0.258554				39600.3	50280.5
Q15223	Poliovirus receptor-related protein 1	14394.7	19564.6	13771.4	2596.49	15910.2	0.163197
Q15257	Serine/threonine-protein phosphatase 2A activator	138186	151538	121944	12101	137222	0.088185
Q15286	Ras-related protein Rab-35	606785	535429	564891	29277.9	569035	0.0514519
Q15293	Reticulocalbin-1	84165.7	84299	77311	3263.21	81925.3	0.0398316
Q15365	Poly(rC)-binding protein 1	118585	101232	128409	11235.9	116075	0.0967988
Q15366	Poly(rC)-binding protein 2	180932	177140	172306	3529.97	176793	0.0199667
Q15418	Ribosomal protein S6 kinase alpha-1	Filtered	3473.66	10998.2	3762.26	7235.92	0.519943				8858.42	9012.29
Q15435	Protein phosphatase 1 regulatory subunit 7	150636	140544	118425	13451.8	136535	0.098523
Q15437	Protein transport protein Sec23B	32446.8	33041.3	31675.7	559.051	32387.9	0.0172611
Q15477	Helicase SKI2W	Filtered	7166.99	4814.56	1176.21	5990.77	0.196337
Q15582	Transforming growth factor-beta-induced protein ig-h3	12725.3	12677.2	11018.1	793.688	12140.2	0.0653767
Q15628	Tumor necrosis factor receptor type 1-associated DEATH domain protein	3709.09	8511.04	5138.78	2013.15	5786.3	0.347916				6405.3	8122.36
Q15631	Translin	70887.8	60069.9	70666.3	5048.21	67208	0.0751132
Q15642	Cdc42-interacting protein 4	25509.4	17914.6	23203.7	3179.31	22209.2	0.143153
Q15782	Chitinase-3-like protein 2	241492	243485	207386	16567.6	230788	0.0717873
Q15833	Syntaxin-binding protein 2	13592.7	14546.8	15086.8	617.7	14408.8	0.0428698
Q15843	NEDD8	62993.4	37292.5	61324.9	11742	53870.3	0.217969				55257.2	32250.7
Q15847	Adipose most abundant gene transcript 2 protein	117324	85875.1	178129	38292.8	127109	0.301259				33560	104601
Q15907	Ras-related protein Rab-11B	197632	209920	177715	13269.9	195089	0.0680197
Q16181	Septin-7	Filtered	14867.4	19977.3	2554.92	17422.4	0.146646
Q16204	Coiled-coil domain-containing protein 6	79140.5	65124.3	62430.9	7325.14	68898.6	0.106318
Q16222	UDP-N-acetylhexosamine pyrophosphorylase	37416.5	46784.1	43368.3	3870.75	42522.9	0.0910274
Q16270	Insulin-like growth factor-binding protein 7	10533.8	10145.6	11392.6	521.003	10690.7	0.0487343
Q16378	Proline-rich protein 4	74213960	70779256	73832984	1.53723e+06	7.29421e+07	0.0210746
Q16401	26S proteasome non-ATPase regulatory subunit 5	36550	39525	43382.4	2797.06	39819.1	0.0702442
Q16531	DNA damage-binding protein 1	16066.3	14314.7	16991.6	1110.06	15790.8	0.0702977
Q16539	Mitogen-activated protein kinase 14	3349.49	12842.8	5825.41	4020.75	7339.24	0.547843				7417.73	8352.27
Q16543	Hsp90 co-chaperone Cdc37	30300.1	16855.6	18315.7	6023.22	21823.8	0.275993				20217.2	15461.9
Q16651	Prostasin	Filtered	Filtered	Filtered	#DIV/0!	#DIV/0!	#DIV/0!				14455	10596.3
Q16706	Alpha-mannosidase 2	8747.91	9466.54	8451.51	426.169	8888.65	0.0479453
Q16719	Kynureninase	71402.5	72461.6	83563.2	5499.97	75809.1	0.0725503
Q16769	Glutaminyl-peptide cyclotransferase	15605.7	14370.4	23639.6	4109.44	17871.9	0.229939				16879.3	21816
Q16851	UTP--glucose-1-phosphate uridylyltransferase	155560	161006	153565	3145.01	156710	0.0200689
Q16881	Thioredoxin reductase 1, cytoplasmic	20526.4	19259.5	30125.9	4851.52	23303.9	0.208185				27110.7	33153.6
Q24JP5	Transmembrane protein 132A	8182.02	5135.5	6997.7	1253.96	6771.74	0.185175
Q2I0M4	Leucine-rich repeat-containing protein 26	24345.1	26634.3	24685.4	1008.53	25221.6	0.0399869
Q2TAA2	Isoamyl acetate-hydrolyzing esterase 1 homolog	Filtered	3963.04	5606.48	821.723	4784.76	0.171738
Q32MZ4	Leucine-rich repeat flightless-interacting protein 1	7502.57	10760	8036.53	1426.45	8766.35	0.162719
Q3LXA3	Bifunctional ATP-dependent dihydroxyacetone kinase/FAD-AMP lyase (cyclizing)	13918.3	20193.6	16077.5	2603.06	16729.8	0.155594
Q3ZCW2	Galectin-related protein	12644.3	14994.4	13339	985.778	13659.2	0.0721693
Q53EL6	Programmed cell death protein 4	26316.3	34198.6	40198.1	5684.59	33571	0.16933
Q53FA7	Quinone oxidoreductase PIG3	104550	116572	98770.7	7414.67	106631	0.0695359
Q53RT3	Retroviral-like aspartic protease 1	46087.3	49656.8	39940.3	4012.98	45228.1	0.0887276
Q5D862	Filaggrin-2	10477.5	11916.1	9003.87	1188.93	10465.8	0.113601
Q5SRE7	Phytanoyl-CoA dioxygenase domain-containing protein 1	29409.5	31360.7	30408.5	796.649	30392.9	0.0262117
Q5VW32	BRO1 domain-containing protein BROX	38387.5	37226.7	30519.1	3468.14	35377.8	0.0980315
Q5VWZ2	Lysophospholipase-like protein 1	11465.9	12500.7	7969.21	1938.84	10645.3	0.182131
Q5VZK9	Leucine-rich repeat-containing protein 16A	6810.85	4836.81	5314.48	840.91	5654.05	0.148727
Q5XPI4	E3 ubiquitin-protein ligase RNF123	Filtered	Filtered	66166.1	0	66166.1	0
Q66K66	Transmembrane protein 198	574750	618809	388622	99761.3	527394	0.189159
Q6DKJ4	Nucleoredoxin	28735.8	21252.5	33931.6	5204.22	27973.3	0.186042
Q6FI81	Anamorsin	33927.9	3675.68	6810.8	13582.5	14804.8	0.91744				Filtered	Filtered
Q6GMV3	Putative peptidyl-tRNA hydrolase PTRHD1	30778.4	16337	21683.1	5961.55	22932.8	0.259957				23049.4	26127.1
Q6IA69	Glutamine-dependent NAD(+) synthetase	34042.8	21364.7	17583	7039.26	24330.2	0.289322				Filtered	32282
Q6IBS0	Twinfilin-2	13646.7	5567.8	16707.7	4699.11	11974.1	0.392441				28525.9	28484.2
Q6MZM9	Uncharacterized protein C4orf40	1.15296e+06	1.25637e+06	1260583	49768.1	1.22331e+06	0.0406833
Q6MZZ7	Calpain-13	52152.2	22226.4	25869.1	13331.8	33415.9	0.398964				36720.1	38997.9
Q6P6B1	Uncharacterized protein C8orf47	22402.1	16144.5	16300.1	2913.87	18282.2	0.159383
Q6P996	Pyridoxal-dependent decarboxylase domain-containing protein 1	18417.5	15285.4	5967.51	5287.67	13223.5	0.39987				8220.82	12184.5
Q6PCB0	von Willebrand factor A domain-containing protein 1	41838.8	34051.3	29699	5021.77	35196.4	0.142679
Q6UXB2	VEGF co-regulated chemokine 1	60901.8	62616.2	56487.8	2581.52	60001.9	0.043024
Q6UXB3	Ly6/PLAUR domain-containing protein 2	66798.8	67555.1	59441.7	3659.49	64598.5	0.0566497
Q6XQN6	Nicotinate phosphoribosyltransferase	296654	264673	265864	14803.1	275730	0.0536869
Q6ZNJ1	Neurobeachin-like protein 2	Filtered	9003.5	3717.2	2643.15	6360.35	0.415567				Filtered	12976
Q6ZVX7	Non-specific cytotoxic cell receptor protein 1 homolog	116763	125354	135284	7567.54	125800	0.0601552
Q71U36	Tubulin alpha-1A chain	1.18074e+06	1.04984e+06	1.08596e+06	55200.7	1.10551e+06	0.0499321
Q7KZF4	Staphylococcal nuclease domain-containing protein 1	10245.9	24952.3	26476.9	7318.52	20558.4	0.355987				25657.5	18783.6
Q7L1Q6	Basic leucine zipper and W2 domain-containing protein 1	25069.1	25799.4	24574.7	503.085	25147.7	0.0200052
Q7L2H7	Eukaryotic translation initiation factor 3 subunit M	2655.45	1780.34	2199.59	357.369	2211.79	0.161574
Q7L576	Cytoplasmic FMR1-interacting protein 1	22805.8	27323.2	21839.5	2390.08	23989.5	0.0996304
Q7L5N1	COP9 signalosome complex subunit 6	18907	17562.3	12138.9	2925.55	16202.7	0.180559
Q7L9L4;Q9H8S9	MOB kinase activator 1B;MOB kinase activator 1A	6816.38	Filtered	8320.59	752.107	7568.49	0.0993735
Q7Z3J2	UPF0505 protein C16orf62	77197.8	34203.2	111334	31557.6	74244.9	0.425047				Filtered	Filtered
Q7Z406	Myosin-14	260057	278774	282739	9891.19	273857	0.0361181
Q7Z4H3	HD domain-containing protein 2	262330	392223	18201.5	155049	224251	0.691409				218178	36139.2
Q7Z4S6	Kinesin-like protein KIF21A	23302.1	20594	16871.1	2636.34	20255.7	0.130153
Q7Z4W1	L-xylulose reductase	60613.6	59338.8	64890.8	2374.5	61614.4	0.038538
Q7Z6Z7	E3 ubiquitin-protein ligase HUWE1	6190.52	7962.2	5972.92	890.907	6708.55	0.132802
Q7Z7M9	Polypeptide N-acetylgalactosaminyltransferase 5	13106	9113.23	13476.8	1975.42	11898.7	0.16602
Q86SF2	N-acetylgalactosaminyltransferase 7	13252.7	8003.69	12136.5	2257.77	11130.9	0.202837				4188.2	8499.81
Q86VP6	Cullin-associated NEDD8-dissociated protein 1	153357	140565	144560	5343.57	146160	0.0365596
Q86X29	Lipolysis-stimulated lipoprotein receptor	57426.2	63670.2	68424.8	4503.87	63173.7	0.0712934
Q86X76	Nitrilase homolog 1	36187.6	35676.2	28220.1	3641.4	33361.3	0.10915
Q8IV08	Phospholipase D3	14677.4	15102.9	15438	311.266	15072.8	0.0206509
Q8IWE2	Protein NOXP20	23781.5	24234.4	20932.2	1461.68	22982.7	0.0635992
Q8IZ83	Aldehyde dehydrogenase family 16 member A1	29943.6	26898.8	21454	3511.75	26098.8	0.134556
Q8IZP0	Abl interactor 1	18464	19224.9	25564.1	3182.89	21084.4	0.15096
Q8N0W3	L-fucose kinase	17495.2	10290.4	8415.45	3913.89	12067	0.324346				10088.5	8364.97
Q8N1G4	Leucine-rich repeat-containing protein 47	16475	20629.6	18197	1704.34	18433.8	0.0924571
Q8N1Q1	Carbonic anhydrase 13	48282.8	23575.5	29730	10501.5	33862.7	0.310119				19664.4	14496.8
Q8N335	Glycerol-3-phosphate dehydrogenase 1-like protein	152922	144592	151041	3567.24	149518	0.0238582
Q8N392	Rho GTPase-activating protein 18	Filtered	4776.28	5605.55	414.634	5190.92	0.0798767
Q8N474	Secreted frizzled-related protein 1	301179	323651	172217	66723.6	265682	0.251141				256194	214240
Q8NBF2	NHL repeat-containing protein 2	20969.2	9942.76	12720.6	4682.59	14544.2	0.321956				17448.8	19439.5
Q8NBJ4	Golgi membrane protein 1	224414	228876	235977	4761	229756	0.020722
Q8NBJ7	Sulfatase-modifying factor 2	24585	30760.6	28691.5	2566.5	28012.4	0.0916203
Q8NBS9	Thioredoxin domain-containing protein 5	48069.7	31268.7	26473.4	9259.62	35270.6	0.262531				27225.5	29503.2
Q8NCL4	Polypeptide N-acetylgalactosaminyltransferase 6	18724.5	22646	30198.3	4761.71	23856.3	0.1996
Q8NCW5	NAD(P)H-hydrate epimerase	39616	70798.3	71527.8	14874.4	60647.4	0.245261				64458.1	78496.3
Q8NDH3	Probable aminopeptidase NPEPL1	10835.4	8543.13	6865.26	1627.25	8747.93	0.186016
Q8NFU3	Thiosulfate sulfurtransferase/rhodanese-like domain-containing protein 1	61142.3	43994.9	52969.1	7002.95	52702.1	0.132878
Q8NI22	Multiple coagulation factor deficiency protein 2	29456.2	17933.3	15604.4	6055.99	20998	0.288408				11358.3	5767.08
Q8TAX9	Gasdermin-B	71713.1	8342.4	20100.7	27523.6	33385.4	0.824421				22197.8	17199.3
Q8TBC4	NEDD8-activating enzyme E1 catalytic subunit	7622.28	11371.7	10818.9	1652.69	9937.64	0.166306
Q8TBF2	Prostamide/prostaglandin F synthase	6071.85	7327.66	9073.17	1230.71	7490.9	0.164293
Q8TCD5	5'(3')-deoxyribonucleotidase, cytosolic type	19089.3	52128.8	35264.1	13489.3	35494	0.380043				37552.9	12734.2
Q8TDQ7	Glucosamine-6-phosphate isomerase 2	Filtered	13855.5	15273	708.789	14564.3	0.0486663
Q8TE68	Epidermal growth factor receptor kinase substrate 8-like protein 1	26509.8	23344.7	15946.4	4426.41	21933.6	0.201809				18584.6	25362
Q8TE77	Protein phosphatase Slingshot homolog 3	62402.4	85527.4	58876.7	11820.2	68935.5	0.171468
Q8TF09;Q9NP97	Dynein light chain roadblock-type 2;Dynein light chain roadblock-type 1	50360.4	44096.3	65129.3	8817.56	53195.3	0.165758
Q8WUM4	Programmed cell death 6-interacting protein	237608	240130	271864	15588	249867	0.0623853
Q8WVQ1	Soluble calcium-activated nucleotidase 1	25107.9	34580.5	30907	3899.49	30198.5	0.129129
Q8WVY7	Ubiquitin-like domain-containing CTD phosphatase 1	14580.2	8047.85	Filtered	3266.18	11314	0.288684				3818.36	13358.5
Q8WW59	SPRY domain-containing protein 4	Filtered	10985.8	Filtered	0	10985.8	0
Q8WWI1	LIM domain only protein 7	20196.6	8721.15	10743.3	5001.54	13220.4	0.378321				7309.03	16234.1
Q8WXG9	G-protein coupled receptor 98	41065	84139.8	36314.9	21512.9	53839.9	0.399571				42755.3	53424.7
Q8WXI7	Mucin-16	107146	53978.9	83012.5	21736.1	81379.1	0.267097				62106.5	79289.5
Q8WZA0	Protein LZIC	27404.3	29751	25585	1705.28	27580.1	0.0618302
Q92499	ATP-dependent RNA helicase DDX1	19495.9	21412.6	16226.6	2141.07	19045	0.112421
Q92530	Proteasome inhibitor PI31 subunit	35819.8	23901.4	23691.7	5668.44	27804.3	0.203869				17373.4	24349.9
Q92597	Protein NDRG1	22900.5	27994.9	31552	3550.51	27482.4	0.129192
Q92598	Heat shock protein 105 kDa	4799.13	1868.21	3548.21	1200.81	3405.19	0.352641				3464.85	4932.91
Q92696	Geranylgeranyl transferase type-2 subunit alpha	196214	39162.8	180031	70530.3	138469	0.509358				252461	199801
Q92734	Protein TFG	33706.9	38744.4	23736	6236.53	32062.4	0.194512
Q92743	Serine protease HTRA1	35536.9	49180.4	31287.8	7632.88	38668.4	0.197393
Q92747	Actin-related protein 2/3 complex subunit 1A	58214.9	15480.3	27976.9	17940.5	33890.7	0.529363				98363.5	94099
Q92817	Envoplakin	556456	5646.03	1.19316e+06	485223	585087	0.829317				1.56289e+06	423166
Q92820	Gamma-glutamyl hydrolase	11737.3	5191.69	4624.1	3227.75	7184.37	0.449274				9004.04	8051.05
Q92882	Osteoclast-stimulating factor 1	23979.6	21671.9	22033.9	1013.38	22561.8	0.0449158
Q92896	Golgi apparatus protein 1	14502.4	12633.7	16689.1	1657.33	14608.4	0.11345
Q93009	Ubiquitin carboxyl-terminal hydrolase 7	1.01712e+06	328826	835346	291233	727097	0.400542				498460	426474
Q969H8	UPF0556 protein C19orf10	18047	16750.5	18672.6	800.476	17823.4	0.0449116
Q96AE4	Far upstream element-binding protein 1	22255.1	34870.1	27738.9	5164.65	28288	0.182574
Q96AG4	Leucine-rich repeat-containing protein 59	16146.2	9540.79	7453.46	3705.14	11046.8	0.335403				10685.2	18510.2
Q96BM9;Q9NVJ2	ADP-ribosylation factor-like protein 8A;ADP-ribosylation factor-like protein 8B	899.193	1780.85	1459.35	364.303	1379.8	0.264027				Filtered	Filtered
Q96BQ1	Protein FAM3D	31945.7	24952.2	32455.9	3423.36	29784.6	0.114937
Q96BW5	Phosphotriesterase-related protein	21564.5	32184.8	6561.79	10511.4	20103.7	0.522861				10742.9	10555
Q96C19	EF-hand domain-containing protein D2	40999	49390.1	38694.9	4595.95	43028	0.106813
Q96C23	Aldose 1-epimerase	32597.7	53632.2	67195.8	14233.9	51141.9	0.278322				74192.8	80980.2
Q96C86	m7GpppX diphosphatase	6158.9	10906.6	Filtered	2373.84	8532.74	0.278204				Filtered	12409.4
Q96CN7	Isochorismatase domain-containing protein 1	17860.7	13013.3	13839.8	2117.33	14904.6	0.142059
Q96CW1	AP-2 complex subunit mu	17270	20769.5	30864.1	5763.36	22967.9	0.250931				29788.9	69981.3
Q96CX2	BTB/POZ domain-containing protein KCTD12	12208	12982.9	8137.33	2125.26	11109.4	0.191302
Q96DA0	Zymogen granule protein 16 homolog B	1.80037e+06	1.78986e+06	1.92485e+06	61307.9	1.83836e+06	0.0333492
Q96DG6	Carboxymethylenebutenolidase homolog	Filtered	Filtered	16044.7	0	16044.7	0
Q96DR8	Mucin-like protein 1	415452	481704	522340	44052.3	473165	0.0931014
Q96EY5	Multivesicular body subunit 12A	13642.6	22463	22796.8	4238.85	19634.1	0.215892				17029.5	20646.2
Q96FQ6	Protein S100-A16	39563.4	27524	39139.8	5578.27	35409.1	0.157538
Q96FV2	Secernin-2	44698.6	48784.1	40044.2	3570.59	44509	0.0802218
Q96FW1	Ubiquitin thioesterase OTUB1	121683	131027	113348	7221.39	122019	0.0591822
Q96G03	Phosphoglucomutase-2	51203.9	44484.5	51153.9	3155.81	48947.4	0.0644735
Q96HC4	PDZ and LIM domain protein 5	71389.7	72436.8	73034.1	679.661	72286.9	0.00940227
Q96HE7	ERO1-like protein alpha	35662.8	23331.3	29535.1	5034.37	29509.7	0.1706
Q96HN2	Putative adenosylhomocysteinase 3	71102.8	48157	70779.3	10741.3	63346.4	0.169565
Q96IJ6	Mannose-1-phosphate guanyltransferase alpha	15110.2	28820.3	14716.4	6557.8	19549	0.335455				17616.4	19203.4
Q96IU4	Abhydrolase domain-containing protein 14B	95555.1	79450.1	103734	10088.3	92913.1	0.108578
Q96KP4	Cytosolic non-specific dipeptidase	747285	897915	800895	62340	815365	0.0764566
Q96L46	Calpain small subunit 2	79570.8	69413	72396.1	4262.94	73793.3	0.0577687
Q96M27	Protein PRRC1	Filtered	Filtered	14112.9	0	14112.9	0
Q96NY7	Chloride intracellular channel protein 6	23681.3	19224	21144.2	1825.5	21349.8	0.0855042
Q96PD5	N-acetylmuramoyl-L-alanine amidase	66681.9	89190.9	66761.9	10592	74211.6	0.142728
Q96QK1	Vacuolar protein sorting-associated protein 35	64197.3	99497.2	72695.8	15043	78796.8	0.190909
Q96S96	Phosphatidylethanolamine-binding protein 4	85720.1	98105.6	79559.3	7712.33	87795	0.0878448
Q96TA1	Niban-like protein 1	67578	68809.6	63802.8	2130.13	66730.1	0.0319216
Q99417	C-Myc-binding protein	8680.04	12256.8	9060.68	1603.91	9999.16	0.160404
Q99439	Calponin-2	29286.8	16807.1	36364.9	8085.34	27486.3	0.294159				17786.1	25181.8
Q99447	Ethanolamine-phosphate cytidylyltransferase	Filtered	Filtered	2826.99	0	2826.99	0
Q99460	26S proteasome non-ATPase regulatory subunit 1	22922.7	22675.6	23160.8	198.127	22919.7	0.00864441
Q99471	Prefoldin subunit 5	15218.2	13220.8	19901.8	2800.07	16113.6	0.17377
Q99497	Protein DJ-1	348586	372626	343946	12569.6	355052	0.0354022
Q99519	Sialidase-1	8442.92	6210.09	8366.31	1034.98	7673.1	0.134884
Q99536	Synaptic vesicle membrane protein VAT-1 homolog	24825.7	27910.2	31636.2	2784.49	28124.1	0.0990074
Q99538	Legumain	16045.4	6542.61	17900.4	4974.86	13496.1	0.368614				12452.3	14743.4
Q99574	Neuroserpin	75857.1	54384.4	50562.2	11133.1	60267.9	0.184727
Q99584	Protein S100-A13	36770.6	31576.1	45363.1	5685.21	37903.3	0.149993
Q99598	Translin-associated protein X	49929.7	11092.4	9884.71	18599.2	23635.6	0.786917				115251	13356.5
Q99613	Eukaryotic translation initiation factor 3 subunit C	25119.8	29374.8	23870.6	2356.15	26121.7	0.0901987
Q99614	Tetratricopeptide repeat protein 1	121861	197068	296411	71486.6	205114	0.348522				42339.9	105199
Q99714	3-hydroxyacyl-CoA dehydrogenase type-2	Filtered	3704.24	Filtered	0	3704.24	0
Q99729	Heterogeneous nuclear ribonucleoprotein A/B	24734.6	22189.1	24531.2	1155	23818.3	0.0484923
Q99733	Nucleosome assembly protein 1-like 4	29318.3	14937.6	33261.6	7874.88	25839.2	0.304765				33910.9	50076.6
Q99747	Gamma-soluble NSF attachment protein	15568.1	14558	4558.74	4968.91	11561.6	0.429777				11257.2	10219.7
Q99798	Aconitate hydratase, mitochondrial	16435.4	13501.3	12236.5	1758.76	14057.7	0.12511
Q99829	Copine-1	33726.4	34047.9	32395.1	715.501	33389.8	0.0214288
Q99832	T-complex protein 1 subunit eta	32876.4	34348.4	35510.3	1077.77	34245.1	0.0314722
Q99933	BAG family molecular chaperone regulator 1	34798.5	34880.3	39741.3	2311.01	36473.3	0.0633616
Q99935	Proline-rich protein 1	3.53984e+06	3.83621e+06	3.31758e+06	212451	3.56454e+06	0.0596012
Q99954	Submaxillary gland androgen-regulated protein 3A	8.08591e+06	8323715	7701864	256199	8.03716e+06	0.0318768
Q99961	Endophilin-A2	18972.1	Filtered	23260.4	2144.14	21116.2	0.10154
Q9BPX5	Actin-related protein 2/3 complex subunit 5-like protein	52547.1	70504.3	52553.8	8463.52	58535.1	0.144589
Q9BPY8	Homeodomain-only protein	27333.9	8474.24	23505.7	8139.67	19771.3	0.411692				21592.9	8575.7
Q9BQ16	Testican-3	8627.75	Filtered	16249.4	3810.84	12438.6	0.306373				24123.5	Filtered
Q9BQC3	Diphthamide biosynthesis protein 2	11272.6	12424.1	Filtered	575.729	11848.4	0.0485914
Q9BQE3	Tubulin alpha-1C chain	29004.5	44353.4	35645.4	6285.09	36334.5	0.172979
Q9BR76	Coronin-1B	74869.7	90963.6	85742.6	6704.01	83858.6	0.0799441
Q9BRA2	Thioredoxin domain-containing protein 17	187740	210046	154208	22948.7	183998	0.124722
Q9BRF8	Calcineurin-like phosphoesterase domain-containing protein 1	4604.03	12932.1	25573.3	8620.82	14369.8	0.599926				14313.2	3270.31
Q9BRG1	Vacuolar protein-sorting-associated protein 25	28874.8	30396.3	28376.1	859.271	29215.7	0.0294112
Q9BRK5	45 kDa calcium-binding protein	49151.3	59153.9	56593.6	4242.61	54966.3	0.0771856
Q9BS26	Endoplasmic reticulum resident protein 44	16242	17103.9	14479.3	1092.35	15941.7	0.0685213
Q9BS40	Latexin	211797	216235	193268	9947.11	207100	0.0480305
Q9BT78	COP9 signalosome complex subunit 4	10452.4	14325.9	21938.8	4771.43	15572.4	0.306403				12129.5	18788.6
Q9BTE1	Dynactin subunit 5	9643.73	Filtered	5471.83	2085.95	7557.78	0.276				6115.03	6031.64
Q9BU02	Thiamine-triphosphatase	Filtered	9500.53	Filtered	0	9500.53	0
Q9BUT1	3-hydroxybutyrate dehydrogenase type 2	66631.8	47107.2	80664.2	13760.6	64801.1	0.212352				64935.1	86386.9
Q9BV20	Methylthioribose-1-phosphate isomerase	8712.71	7036.88	8045.67	688.881	7931.75	0.086851
Q9BVG4	UPF0368 protein Cxorf26	20535.2	22132.4	19735.6	996.367	20801.1	0.0478998
Q9BVJ7	Dual specificity protein phosphatase 23	16618.8	8921.39	Filtered	3848.73	12770.1	0.301386				27972.2	34718.3
Q9BW04	Specifically androgen-regulated gene protein	21462.1	27591.8	21826.6	2807.58	23626.8	0.11883
Q9BWD1	Acetyl-CoA acetyltransferase, cytosolic	45940.4	36600.6	40241.7	3843.67	40927.6	0.093914
Q9BWS9	Chitinase domain-containing protein 1	10649.1	5004.3	6893.42	2346.09	7515.6	0.312163				14127.6	8204.28
Q9BX68	Histidine triad nucleotide-binding protein 2, mitochondrial	9043.81	7075.13	5441.23	1472.86	7186.72	0.204942				8886.12	5701.69
Q9BY32	Inosine triphosphate pyrophosphatase	18998.4	21159.8	28532.7	4081.61	22896.9	0.17826
Q9BY43	Charged multivesicular body protein 4a	13499.2	14562.7	11394.4	1316.5	13152.1	0.100098
Q9BZE9	Tether containing UBX domain for GLUT4	10467.8	4871.34	Filtered	2798.25	7669.59	0.36485				Filtered	Filtered
Q9BZQ8	Protein Niban	61531	69972.3	62582.6	3756	64695.3	0.0580567
Q9GZS3	WD repeat-containing protein 61	16972.7	18096.3	12430.9	2449.17	15833.3	0.154685
Q9GZT8	NIF3-like protein 1	75259.4	42322.3	32832.4	18181.1	50138.1	0.36262				76756	80380.8
Q9GZZ8	Extracellular glycoprotein lacritin	259401344	238930880	236016800	1.0405e+07	244783008	0.0425069
Q9GZZ9	Ubiquitin-like modifier-activating enzyme 5	8662.84	15426.6	9661.75	2981.05	11250.4	0.264973				10191.6	14529.6
Q9H008	Phospholysine phosphohistidine inorganic pyrophosphate phosphatase	77905.9	21840.6	21572.5	26492.8	40439.7	0.65512				24603.7	12259
Q9H0A8	COMM domain-containing protein 4	2665.47	5059.61	2128.97	1274.03	3284.68	0.387871				Filtered	Filtered
Q9H0U4	Ras-related protein Rab-1B	500785	436124	464307	26469.8	467072	0.0566718
Q9H0W9	Ester hydrolase C11orf54	110979	110125	36172	35064.8	85758.7	0.408878				26872	125905
Q9H173	Nucleotide exchange factor SIL1	9742.5	6363.4	12206.3	2395.09	9437.4	0.253787				5906.27	13412.8
Q9H299	SH3 domain-binding glutamic acid-rich-like protein 3	103690	117552	110124	5664.35	110455	0.0512818
Q9H2G2	STE20-like serine/threonine-protein kinase	17002.2	11571.1	Filtered	2715.55	14286.7	0.190075
Q9H2H8	Peptidyl-prolyl cis-trans isomerase-like 3	3936.54	7777.71	7459.86	1740.67	6391.37	0.272347				5934.5	12577.8
Q9H2U2	Inorganic pyrophosphatase 2, mitochondrial	250448	136155	276817	61050	221140	0.27607				125191	136333
Q9H3S4	Thiamin pyrophosphokinase 1	21102.1	9372.93	15913	4799	15462.7	0.31036				11735.8	3945.44
Q9H3U1	Protein unc-45 homolog A	10917.9	11323	9513	775.607	10584.6	0.0732767
Q9H444	Charged multivesicular body protein 4b	19162.9	6588.01	19138.1	5922.03	14963	0.395778				17856.6	20260
Q9H4A4	Aminopeptidase B	242174	229169	223338	7873.76	231560	0.0340031
Q9H4G0	Band 4.1-like protein 1	10422.9	19760	17687.5	4003.5	15956.8	0.250896				17553.1	20038.7
Q9H4M9	EH domain-containing protein 1	4683.69	10203.7	12162.4	3166.47	9016.61	0.351182				8476.32	14041.9
Q9H6S3	Epidermal growth factor receptor kinase substrate 8-like protein 2	50546.4	47906.6	36928.8	5896.51	45127.3	0.130664
Q9H773	dCTP pyrophosphatase 1	26802.5	19939.5	28293	3637.8	25011.6	0.145444
Q9H788	SH2 domain-containing protein 4A	24945	24235.3	37252.3	5976.03	28810.9	0.207423				17511.5	24355.1
Q9H910	Hematological and neurological expressed 1-like protein	31949.3	29387.4	34493.8	2084.67	31943.5	0.0652612
Q9H993	UPF0364 protein C6orf211	9457.45	9095.15	85150.3	35767.7	34567.6	1.03472				9610.14	194549
Q9H9H4	Vacuolar protein sorting-associated protein 37B	14304.5	8714.59	14985.7	2809.45	12668.3	0.221771				8661.91	13419.9
Q9HA64	Ketosamine-3-kinase	23517.4	11289.6	12599.1	5481.72	15802	0.3469				17753.3	23806.5
Q9HB71	Calcyclin-binding protein	Filtered	Filtered	4907.31	0	4907.31	0
Q9HBR0	Putative sodium-coupled neutral amino acid transporter 10	16729.3	12390.9	11016.7	2434.54	13379	0.181968
Q9HC38	Glyoxalase domain-containing protein 4	298034	320162	282297	15531.8	300164	0.0517443
Q9NP72	Ras-related protein Rab-18	46282.5	12159.1	12298	16053.3	23579.9	0.680805				7926.77	13454.8
Q9NPQ8	Synembryn-A	14520.7	6768.22	8871.14	3273.47	10053.4	0.32561				10580.4	19156.9
Q9NQP4	Prefoldin subunit 4	9870.6	94834	14380	39032.7	39694.9	0.983319				Filtered	40105.6
Q9NQR4	Omega-amidase NIT2	33200.7	28071	30484.5	2095.43	30585.4	0.0685107
Q9NQW7	Xaa-Pro aminopeptidase 1	164858	190469	203494	16049.6	186274	0.0861614
Q9NQX5	Neural proliferation differentiation and control protein 1	1959.74	Filtered	10910.9	4475.56	6435.31	0.69547				7477.62	5857.46
Q9NR19	Acetyl-coenzyme A synthetase, cytoplasmic	14461.5	8255.32	6311.88	3475.48	9676.24	0.359177				14378.2	8289.12
Q9NR28	Diablo homolog, mitochondrial	25169.8	26732.4	23495.5	1321.74	25132.6	0.0525906
Q9NR31	GTP-binding protein SAR1a	17204.5	27592.1	16070	5184.91	20288.9	0.255555				16745.3	21325.2
Q9NR45	Sialic acid synthase	102607	94603.5	113797	7871.6	103669	0.0759299
Q9NR46	Endophilin-B2	7989.04	16775.5	11554.7	3608.19	12106.4	0.298039				9590.79	14810.8
Q9NRA1	Platelet-derived growth factor C	56214.2	50142.1	22460.8	14691	42939	0.342136				Filtered	10887.5
Q9NRF8	CTP synthase 2	13916.4	Filtered	14237.4	160.536	14076.9	0.0114042
Q9NRV9	Heme-binding protein 1	34113.4	30303	29751.7	1939.31	31389.4	0.0617823
Q9NRW7	Vacuolar protein sorting-associated protein 45	4118.51	6108.86	3798.39	1022.1	4675.25	0.21862				Filtered	1466.94
Q9NRX4	14 kDa phosphohistidine phosphatase	26068.2	38784.6	21367.1	7357.33	28740	0.255996				39978.9	33346.8
Q9NT62	Ubiquitin-like-conjugating enzyme ATG3	17480	19480.5	19259.6	895.531	18740	0.0477871
Q9NTK5	Obg-like ATPase 1	22531.4	14954.5	35661.9	8554.53	24382.6	0.350846				46781.9	49658
Q9NTX5	Ethylmalonyl-CoA decarboxylase	25617.7	69604.7	7351.07	26128	34191.1	0.764174				18373.6	11560.8
Q9NUL5	UPF0515 protein C19orf66	8543.07	6408.65	5402.37	1309.47	6784.7	0.193003
Q9NUQ9	Protein FAM49B	34749.1	37800.9	33025.4	1974.53	35191.8	0.0561076
Q9NUU7	ATP-dependent RNA helicase DDX19A	11094.6	18402.1	10299.2	3646.74	13265.3	0.274909				15001	18987.6
Q9NVA2	Septin-11	Filtered	Filtered	5433.09	0	5433.09	0
Q9NWV4	UPF0587 protein C1orf123	10159.4	9138.76	10343.7	529.935	9880.61	0.0536339
Q9NX46	Poly(ADP-ribose) glycohydrolase ARH3	26624	33878	43833.1	7054.38	34778.4	0.202838				29660.5	31404.9
Q9NY33	Dipeptidyl peptidase 3	148420	149206	205896	26911	167841	0.160336
Q9NYL9	Tropomodulin-3	37531.5	28567.8	39380.6	4722.13	35160	0.134304
Q9NYU2	UDP-glucose:glycoprotein glucosyltransferase 1	18119.2	16438.1	12944.1	2155.5	15833.8	0.136133
Q9NZ08	Endoplasmic reticulum aminopeptidase 1	57570.7	66589.2	64316.5	3829.79	62825.5	0.0609592
Q9NZL9	Methionine adenosyltransferase 2 subunit beta	52976.5	15204.1	17671.5	17253.9	28617.4	0.602918				20929.5	28751.9
Q9NZN3	EH domain-containing protein 3	26688.5	40108	35880.4	5602.06	34225.6	0.16368
Q9NZP8	Complement C1r subcomponent-like protein	14024	18267.9	13904.2	2029.4	15398.7	0.131791
Q9NZT1	Calmodulin-like protein 5	85193.4	64194.7	119290	22703.2	89559.2	0.2535				132218	105163
Q9P0R6	GSK3-beta interaction protein	6710.03	Filtered	Filtered	0	6710.03	0
Q9P1F3	Costars family protein ABRACL	47969.8	23054.8	95210.7	29923.9	55411.7	0.540027				32578.6	69067.9
Q9P289	Serine/threonine-protein kinase MST4	21893.5	19890.8	17604.8	1752.1	19796.4	0.088506
Q9P2E9	Ribosome-binding protein 1	4461.27	4811.84	2001.73	1250.29	3758.28	0.332675				9344.43	Filtered
Q9P2R3	Ankyrin repeat and FYVE domain-containing protein 1	12602	14826.1	2762.67	5241.77	10063.6	0.520865				16394.2	44565.6
Q9P2T1	GMP reductase 2	60971.9	58595.9	66953.7	3516.31	62173.8	0.0565561
Q9UBC9	Small proline-rich protein 3	61409.2	69665.2	80305.6	7734.87	70460	0.109777
Q9UBG3	Cornulin	18086.6	13021.9	13355.3	2312.96	14821.3	0.156057
Q9UBQ0	Vacuolar protein sorting-associated protein 29	38330.2	34777	39905.7	2145.02	37671	0.056941
Q9UBQ5	Eukaryotic translation initiation factor 3 subunit K	39552.9	24407.2	48659.1	10002.6	37539.7	0.266454				45253.1	46184.2
Q9UBQ7	Glyoxylate reductase/hydroxypyruvate reductase	81030.1	104870	94176.6	9749.57	93358.7	0.104431
Q9UBR2	Cathepsin Z	46872.4	77857.4	76464.7	14289.5	67064.9	0.21307				54132.8	43300.7
Q9UBT3	Dickkopf-related protein 4	25338.6	15390.4	22941.9	4239.17	21223.6	0.199739
Q9UBV8	Peflin	Filtered	Filtered	Filtered	#DIV/0!	#DIV/0!	#DIV/0!				Filtered	16870.2
Q9UBX1	Cathepsin F	11322.1	Filtered	Filtered	0	11322.1	0
Q9UBX7	Kallikrein-11	41137.1	46680	86865.7	20376.2	58227.6	0.349941				56307.3	53063.9
Q9UDY2	Tight junction protein ZO-2	24876.3	21060.3	20625.3	1909.7	22187.3	0.0860716
Q9UEW8	STE20/SPS1-related proline-alanine-rich protein kinase	24671.1	43974.7	23931.1	9279.15	30859	0.300695				42359	44500.3
Q9UGI8	Testin	45750.1	38481.2	31822.9	5687.58	38684.7	0.147024
Q9UGM3	Deleted in malignant brain tumors 1 protein	16866204	16758837	17789168	462478	1.71381e+07	0.0269854
Q9UH65	Switch-associated protein 70	15100.9	Filtered	18896.5	1897.81	16998.7	0.111645
Q9UHA4	Ragulator complex protein LAMTOR3	30874.2	27235.6	40814	5738.91	32974.6	0.17404
Q9UHD0	Interleukin-19	Filtered	Filtered	4045.23	0	4045.23	0
Q9UHD8	Septin-9	6716.5	25180.5	12377.4	7723.57	14758.1	0.523343				7185.8	11484.9
Q9UHD9	Ubiquilin-2	2313.31	1810.59	3150.78	552.787	2424.89	0.227963				2354.24	1782.51
Q9UHL4	Dipeptidyl peptidase 2	75942.9	35340.4	20127	23559.4	43803.4	0.537845				Filtered	Filtered
Q9UHY1	Nuclear receptor-binding protein	9212.38	10986.7	5930.24	2094.66	8709.77	0.240496				8908.38	10761.1
Q9UHY7	Enolase-phosphatase E1	47271.4	75517	47136.8	13346.9	56641.8	0.235638				53573.8	54771.8
Q9UI12	V-type proton ATPase subunit H	44307.3	30834.1	30435.9	6447.25	35192.4	0.1832
Q9UJ70	N-acetyl-D-glucosamine kinase	32479.8	40366.6	36446.2	3219.82	36430.9	0.0883815
Q9UJJ9	N-acetylglucosamine-1-phosphotransferase subunit gamma	19139.5	20347.6	17932.6	985.916	19139.9	0.0515111
Q9UJU6	Drebrin-like protein	54800.2	59119.3	58618.8	1928.95	57512.8	0.0335396
Q9UJW0	Dynactin subunit 4	6192.48	5780.68	4771.29	597.053	5581.48	0.10697
Q9UK41	Vacuolar protein sorting-associated protein 28 homolog	25041.6	26867.3	13904	5729.35	21937.6	0.261166				15471.9	28925.2
Q9UKK9	ADP-sugar pyrophosphatase	26599.1	32006.1	36163.8	3915.86	31589.7	0.12396
Q9UKY7	Protein CDV3 homolog	7542.84	Filtered	3001.6	2270.62	5272.22	0.430677				13747.5	Filtered
Q9UL15	BAG family molecular chaperone regulator 5	10198.9	72376.4	8650.07	29682.5	30408.5	0.976127				Filtered	68691.2
Q9UL46	Proteasome activator complex subunit 2	360610	324306	332342	15569.2	339086	0.0459151
Q9ULA0	Aspartyl aminopeptidase	55022.8	48059.8	54250.3	3116.3	52444.3	0.0594211
Q9ULC4	Malignant T-cell-amplified sequence 1	Filtered	Filtered	Filtered	#DIV/0!	#DIV/0!	#DIV/0!				7163.95	5029.07
Q9ULV0	Unconventional myosin-Vb	26734	2357.77	973.016	11831	10021.6	1.18055				Filtered	Filtered
Q9ULV4	Coronin-1C	8330.03	9878.5	7905.77	847.832	8704.77	0.0973986
Q9ULZ3	Apoptosis-associated speck-like protein containing a CARD	75251.7	85896.4	95505.7	8272.27	85551.3	0.0966938
Q9UM54	Unconventional myosin-VI	11087.8	18054.6	10496.1	3432.17	13212.8	0.259761				20765.4	20708.2
Q9UMS4	Pre-mRNA-processing factor 19	2751.1	2646.54	1514.91	559.731	2304.18	0.24292				1902.54	2287.36
Q9UMX5	Neudesin	14651.2	24372.8	14686.8	4574.45	17903.6	0.255505				8433	20842.6
Q9UN36	Protein NDRG2	46505.1	53299.4	53815.8	3331.24	51206.7	0.0650548
Q9UNF0	Protein kinase C and casein kinase substrate in neurons protein 2	24441.7	16860	23269.1	3332.24	21523.6	0.154818
Q9UNM6	26S proteasome non-ATPase regulatory subunit 13	18481	13094	20309.9	3062.94	17295	0.1771
Q9UNW1	Multiple inositol polyphosphate phosphatase 1	12245.9	9543.54	9524.29	1278.48	10437.9	0.122484
Q9UNZ2	NSFL1 cofactor p47	58083.2	65682.7	56689.7	3952.07	60151.9	0.0657016
Q9UPN7	Serine/threonine-protein phosphatase 6 regulatory subunit 1	Filtered	Filtered	5821.37	0	5821.37	0
Q9UQ80	Proliferation-associated protein 2G4	12177.3	11261.5	6840.32	2330.22	10093	0.230873				7115.91	18912.6
Q9Y224	UPF0568 protein C14orf166	14199.2	11814.9	19801	3347.35	15271.7	0.219187				19959.6	17131.4
Q9Y262	Eukaryotic translation initiation factor 3 subunit L	23104.2	172360	26185.5	69645	73883.2	0.942635				31365.8	21096.6
Q9Y266	Nuclear migration protein nudC	18143.6	16329.3	22272.8	2487	18915.2	0.131482
Q9Y295	Developmentally-regulated GTP-binding protein 1	9215.44	12014.9	10011.8	1177.72	10414	0.11309
Q9Y2E5	Epididymis-specific alpha-mannosidase	5815.43	10940.9	4950.35	2643.79	7235.58	0.365387				5081.77	2733.28
Q9Y2S2	Lambda-crystallin homolog	29532	34532	28521.8	2627.7	30862	0.0851436
Q9Y2V2	Calcium-regulated heat stable protein 1	36638.8	37024.2	19403.8	8217.01	31022.3	0.264875				24625.2	59248.7
Q9Y315	Putative deoxyribose-phosphate aldolase	49524.4	59884.2	46942.9	5592.35	52117.2	0.107303
Q9Y365	PCTP-like protein	29382.2	45403.1	30054.2	7399.02	34946.5	0.211724				37347.5	26398.4
Q9Y371	Endophilin-B1	20273.6	20143.6	26402.8	2920.44	22273.3	0.131118
Q9Y376	Calcium-binding protein 39	38047.9	24972.7	24956.3	6167.6	29325.6	0.210314				29947.3	20439.4
Q9Y383	Putative RNA-binding protein Luc7-like 2	5294.46	Filtered	11601.2	3153.39	8447.85	0.373278				14034.2	27421.9
Q9Y3A5	Ribosome maturation protein SBDS	19906.2	16030.8	22010.9	2476.8	19316	0.128226
Q9Y3F4	Serine-threonine kinase receptor-associated protein	8888.39	15495.6	14233.4	2863.91	12872.5	0.222483				15328.8	11370
Q9Y3I0	tRNA-splicing ligase RtcB homolog	29665.9	10169.8	29054.5	9049.88	22963.4	0.394101				12596.9	21970.3
Q9Y3U8	60S ribosomal protein L36	18072.3	28223.2	19357.1	4512.92	21884.2	0.206218				31702.6	34609.7
Q9Y3Z3	SAM domain and HD domain-containing protein 1	29749.1	32952.1	26734.3	2538.82	29811.8	0.0851615
Q9Y478	5'-AMP-activated protein kinase subunit beta-1	4402.76	4247.42	5175.62	405.929	4608.6	0.0880808
Q9Y490	Talin-1	34345.3	36244.9	39747.4	2237.52	36779.2	0.0608364
Q9Y4L1	Hypoxia up-regulated protein 1	12892.8	13069.3	17878.8	2309.95	14613.7	0.158068
Q9Y5P6	Mannose-1-phosphate guanyltransferase beta	89103.7	87584.4	98529.8	4841.49	91739.3	0.0527744
Q9Y5Z4	Heme-binding protein 2	432996	415121	423221	7307.97	423779	0.0172448
Q9Y624	Junctional adhesion molecule A	15996.5	28560.4	22355.1	5129.31	22304	0.229973				16509.6	26995.6
Q9Y678	Coatomer subunit gamma-1	66314.3	63013.1	64036.2	1379.79	64454.5	0.0214072
Q9Y6E0	Serine/threonine-protein kinase 24	21543.5	21264.1	22495.6	527.168	21767.7	0.0242179
Q9Y6Q5	AP-1 complex subunit mu-2	46003.7	42194.8	39616.5	2623.65	42605	0.0615809
Q9Y6R7	IgGFc-binding protein	26937	19044.4	26167.6	3553.17	24049.7	0.147743
Q9Y6U3	Adseverin	50990.4	46817.4	53900.1	2906.79	50569.3	0.0574813
Q9Y6W5	Wiskott-Aldrich syndrome protein family member 2	Filtered	Filtered	Filtered	#DIV/0!	#DIV/0!	#DIV/0!				18801.8	14226.7

## Sheet: Table S3
PG.ProteinAccessions	PG.ProteinDescriptions	[1] Tear_DIA_15R.raw.PG.Quantity	[2] Tear_DIA_15L.raw.PG.Quantity	[3] Tear_DIA_17R.raw.PG.Quantity	[4] Tear_DIA_17L.raw.PG.Quantity	[5] Tear_DIA_16R.raw.PG.Quantity	[6] Tear_DIA_16L.raw.PG.Quantity	[7] Tear_DIA_14R.raw.PG.Quantity	[8] Tear_DIA_14L.raw.PG.Quantity	[9] Tear_DIA_13R.raw.PG.Quantity	[10] Tear_DIA_13L.raw.PG.Quantity	[11] Tear_DIA_12R.raw.PG.Quantity	[12] Tear_DIA_12L.raw.PG.Quantity	[13] Tear_DIA_11R.raw.PG.Quantity	[14] Tear_DIA_11L.raw.PG.Quantity	[15] Tear_DIA_10R.raw.PG.Quantity	[16] Tear_DIA_10L.raw.PG.Quantity	[17] Tear_DIA_9R.raw.PG.Quantity	[18] Tear_DIA_9L.raw.PG.Quantity	[19] Tear_DIA_8R.raw.PG.Quantity	[20] Tear_DIA_8L.raw.PG.Quantity	[21] Tear_DIA_7R.raw.PG.Quantity	[22] Tear_DIA_7L.raw.PG.Quantity	[23] Tear_DIA_5R.raw.PG.Quantity	[24] Tear_DIA_5L.raw.PG.Quantity	[25] Tear_DIA_4R.raw.PG.Quantity	[26] Tear_DIA_4L.raw.PG.Quantity	[27] Tear_DIA_3R.raw.PG.Quantity	[28] Tear_DIA_3L.raw.PG.Quantity	[29] Tear_DIA_2R.raw.PG.Quantity	[30] Tear_DIA_2L.raw.PG.Quantity	[31] Tear_DIA_1R.raw.PG.Quantity	[32] Tear_DIA_1L.raw.PG.Quantity
A0AVT1	Ubiquitin-like modifier-activating enzyme 6	4475.66	5738.31	4480.07	6671.45	5261.56	2653.75	850.513	3352.26	4527.49	7166.53	3231.74	7612.39	11855	7896.46	Filtered	2363.76	4761.47	4126.46	3574.29	Filtered	3677.15	Filtered	5687.17	10492.9	1833.77	Filtered	4265.42	22775.3	9048.05	7202.66	6063.25	10004.7
A0MZ66	Shootin-1	3341.25	2106.29	6543.66	6723.07	6410.57	3972.39	Filtered	Filtered	7822.44	7507.68	4552.74	5504.66	12086	7154.71	Filtered	Filtered	Filtered	7335.57	6724.23	Filtered	Filtered	Filtered	5427.23	24597.3	Filtered	Filtered	9644.93	Filtered	5310.84	4967.15	12194.7	2148.74
A1A5D9	Bicaudal D-related protein 2	Filtered	Filtered	2800.53	5014.38	Filtered	Filtered	Filtered	Filtered	Filtered	Filtered	Filtered	2579.33	Filtered	Filtered	Filtered	Filtered	Filtered	610.858	Filtered	Filtered	Filtered	Filtered	Filtered	Filtered	Filtered	Filtered	45409.1	Filtered	Filtered	11736.9	Filtered	Filtered
A2VCL2	Coiled-coil domain-containing protein 162	9564.31	12759.9	10728.5	29657.1	1618.9	1653.19	7791.97	10537.1	13907.7	12608.7	29392.5	11591.6	2531.81	4137.42	2424.46	Filtered	6026.99	16189.5	8414.09	Filtered	21964.5	Filtered	6867.35	9200.24	18901.2	Filtered	17129.9	Filtered	34869.3	31407.6	26469.5	55026.2
A5YKK6	CCR4-NOT transcription complex subunit 1	4166.86	2485.39	1371.93	Filtered	Filtered	Filtered	Filtered	Filtered	2316.1	Filtered	1705.2	2403.54	1470.82	Filtered	Filtered	Filtered	Filtered	3192.48	5175.37	Filtered	Filtered	29354.3	Filtered	Filtered	Filtered	Filtered	Filtered	Filtered	Filtered	1979.3	Filtered	Filtered
A6NDU8	UPF0600 protein C5orf51	Filtered	Filtered	309.115	Filtered	565.892	319.816	Filtered	Filtered	531.523	194.841	340.075	545.731	399.645	Filtered	Filtered	Filtered	Filtered	Filtered	1086.49	916.991	Filtered	Filtered	Filtered	393.14	Filtered	Filtered	Filtered	Filtered	Filtered	570.804	Filtered	Filtered
A6NIH7;Q13432	Protein unc-119 homolog B;Protein unc-119 homolog A	3401.2	Filtered	4370.63	Filtered	Filtered	Filtered	Filtered	Filtered	3750.32	Filtered	Filtered	3709.99	3821.34	3130.48	Filtered	Filtered	5647.73	9717.76	Filtered	Filtered	Filtered	Filtered	2339.8	1538.15	Filtered	Filtered	Filtered	Filtered	Filtered	Filtered	3943.14	7174.15
A6NL28	Putative tropomyosin alpha-3 chain-like protein	17737.7	27968.1	25196.3	31628.1	18974.3	18884.6	33080.4	28776.2	21829.1	20618.9	26378.6	29566.4	29178	34203.6	27478.1	31499.3	36259.2	34802	31372	41736.5	32513.1	43711.1	20314	31768.2	33013.4	34514.4	34405.9	28300	24396.8	44170.4	17760.2	22162.8
A8K2U0	Alpha-2-macroglobulin-like protein 1	Filtered	Filtered	1321.66	1582.37	Filtered	Filtered	Filtered	Filtered	Filtered	Filtered	Filtered	Filtered	Filtered	Filtered	Filtered	Filtered	Filtered	Filtered	Filtered	Filtered	Filtered	Filtered	Filtered	Filtered	Filtered	Filtered	Filtered	Filtered	Filtered	Filtered	2861.92	Filtered
B0FP48	Uroplakin-3b-like protein	Filtered	3960.56	2830.54	7027.9	Filtered	4382.39	Filtered	Filtered	7352.39	Filtered	6403.59	Filtered	2272.74	4969.5	Filtered	Filtered	Filtered	Filtered	Filtered	Filtered	Filtered	Filtered	Filtered	Filtered	Filtered	Filtered	Filtered	Filtered	Filtered	Filtered	Filtered	Filtered
B9A064	Immunoglobulin lambda-like polypeptide 5	84011.4	147070	54837.1	146622	83163.2	60513.4	210789	149358	69531.9	94668.2	61082.8	103042	255973	139215	859155	841014	282245	124449	171851	431721	563891	781236	335823	343369	52921.4	375615	263230	265146	307407	292243	131081	135683
O00151	PDZ and LIM domain protein 1	41836.9	64125.1	89173.8	119099	75649.3	61447.7	123800	104327	60477.8	58426.2	59107.8	99645.5	73118.1	60902	105278	119759	71602.8	85927.9	113378	105690	72045.7	72279.9	58277	56126.8	67610.2	137529	81082.1	145089	75311	97209.5	78918.5	97924.8
O00170	AH receptor-interacting protein	3769.68	6406.21	1760.02	Filtered	4156.9	6150.24	10272.4	Filtered	5177.92	5871.05	3411.99	5852.75	8257.52	3775.38	Filtered	Filtered	Filtered	Filtered	4923.62	Filtered	6126.6	Filtered	3703.81	9106.3	7979.8	Filtered	Filtered	10187.3	4884.29	3037.38	3912.81	Filtered
O00178	GTP-binding protein 1	1260.51	4699.67	2565.18	Filtered	3443.97	3120.02	1068.51	Filtered	3265.61	4101.92	Filtered	2532.82	3646.18	1167.69	Filtered	Filtered	Filtered	Filtered	4554.54	Filtered	Filtered	Filtered	2797.1	1218.02	Filtered	Filtered	Filtered	Filtered	Filtered	875.182	1808.65	3678.81
O00182	Galectin-9	4567.4	3555.63	7236.02	8824.2	9160.34	8404.1	22388	20207.7	7312.67	3440.65	12576.8	11229.3	11392	10265.8	8003.98	12398.3	6657.79	5518.71	8771.27	9935.05	10811.2	Filtered	6857.99	7522.13	18226	Filtered	32935.8	Filtered	11695.2	7802.42	14441.3	16207.3
O00194	Ras-related protein Rab-27B	2380.54	5025.07	4089.58	Filtered	6430.58	4318.35	1915.78	Filtered	7808.39	7842.83	1404.25	5561.37	13249.6	618.495	3528.62	1814.75	8640.58	2558.95	852.093	Filtered	Filtered	Filtered	1508.94	789.729	1338.6	Filtered	Filtered	Filtered	3050.51	4503.46	4153.25	1343.56
O00203	AP-3 complex subunit beta-1	2151.94	5719.98	3216.55	Filtered	1958.85	2788.16	3862.72	Filtered	4573.64	Filtered	Filtered	3071.5	Filtered	5960.31	Filtered	Filtered	6243.55	5812.2	8001.93	9993.09	Filtered	Filtered	5163.1	2812.36	5588.03	Filtered	7402.93	Filtered	Filtered	5917.64	Filtered	2499.05
O00204	Sulfotransferase family cytosolic 2B member 1	1087.35	3955.33	4206.44	Filtered	5282.55	5270.6	Filtered	Filtered	4911.19	Filtered	5551.08	5190.58	3282.51	3423.55	Filtered	Filtered	5985.4	5249.25	6698.02	17867.8	12614.8	Filtered	2752.63	Filtered	Filtered	Filtered	Filtered	64711.7	4565.33	4062.79	4978.49	2420.24
O00231	26S proteasome non-ATPase regulatory subunit 11	12504.7	13120.1	10718.8	13460.1	14356.1	20082.9	8379.44	4773.39	13558.8	13846.4	11823.1	9963.75	14294.3	11441	8541.21	9169.04	7823.07	11417.3	13390.6	16063.2	8782.66	12609.8	13060	10613.5	9546.37	13459	10040.4	Filtered	10244.9	12310.8	5841.21	14017.4
O00232	26S proteasome non-ATPase regulatory subunit 12	8813.29	7847.4	8827.66	111592	9959.62	9121.82	63960.4	4719.56	6746.14	7577.97	9640.18	7885.28	8332.29	4249.42	13085.4	16801.2	7266.71	10916.9	11803.6	14866.5	18642	Filtered	6674.51	7720.86	8355.1	9578.52	11709.5	9978.75	17515.5	10665.9	3657.97	5660.38
O00233	26S proteasome non-ATPase regulatory subunit 9	3511.53	2056.5	3372.35	4220.98	4801.2	6039.51	5153.15	5699.61	6387.12	7356.53	Filtered	7025.57	4476.46	4619.19	Filtered	2163.81	Filtered	3935.62	5393.49	Filtered	Filtered	Filtered	1409.06	2150.83	4055.73	Filtered	3830.89	Filtered	2759.17	5620.75	1437.02	5463.37
O00244	Copper transport protein ATOX1	Filtered	4301.12	Filtered	Filtered	2970.23	1725.26	3854.51	Filtered	1308.98	1103.97	3722.55	2783.68	Filtered	Filtered	Filtered	Filtered	Filtered	Filtered	Filtered	Filtered	Filtered	Filtered	Filtered	Filtered	Filtered	Filtered	Filtered	Filtered	Filtered	Filtered	Filtered	Filtered
O00273	DNA fragmentation factor subunit alpha	1159.54	803.043	1398.56	Filtered	523.761	1823.16	3249.59	Filtered	787.217	917.317	2500.37	1749.39	1189.09	1944	Filtered	Filtered	Filtered	2121.78	4636.03	Filtered	Filtered	Filtered	3361.24	2417.06	2302.73	Filtered	2500.58	Filtered	3030.06	Filtered	6408.21	3068.03
O00299	Chloride intracellular channel protein 1	235593	282736	163294	304584	258559	256121	355088	361505	266800	290745	215532	298903	245140	262885	248352	384173	277323	258467	219662	347809	335037	247991	268474	257590	178643	208602	313839	426408	256997	251573	208498	272315
O00303	Eukaryotic translation initiation factor 3 subunit F	8336.89	8780.42	9452.64	4189.09	5625	6274.11	8131.11	Filtered	7026.13	5497.38	9554.85	9774.77	8198.88	5610.58	9782.31	Filtered	6500.92	7585.31	9351.47	7966.75	8979.06	Filtered	7901.6	6338.36	9892.67	Filtered	7191.45	Filtered	5033.49	11054.4	5434.36	6610.97
O00391	Sulfhydryl oxidase 1	26801	21788.2	20182.4	45715.7	40835.5	38631.3	61536.7	65367.9	27499.7	57475.1	49123.5	33835.9	13935.6	17413.2	51802.8	69637.6	37980.1	41770.2	33528.9	128066	52748.7	89543.6	26013.2	12684.5	44225.1	266052	50895.6	332059	51216.6	37762.3	14232.9	25561.9
O00410	Importin-5	11633	40905.9	21163.3	Filtered	75329.1	1104.45	150602	145162	32026.3	68973.5	3699.08	49177	71587.5	65279.7	172656	49359.1	33235.8	27457.6	32287.5	Filtered	Filtered	Filtered	57189.8	26094.1	132018	Filtered	Filtered	15195.1	116250	60658.2	38241.9	88793.8
O00429	Dynamin-1-like protein	2469.99	1581.93	3515.76	3810.09	1524.66	1835.79	Filtered	Filtered	881.108	Filtered	2741.4	3841.24	1771.23	1197.88	Filtered	Filtered	2732.71	12623.7	5804.12	Filtered	Filtered	Filtered	1844.09	Filtered	Filtered	Filtered	Filtered	Filtered	Filtered	9043.44	3617.58	4719.06
O00442	RNA 3'-terminal phosphate cyclase	2940.55	2976.74	3416.73	3009.87	7221.75	3305.47	3218.9	3895.32	3270.43	2575.41	4531.41	4521.33	4630.26	3317.58	Filtered	3413.55	1633.49	3086.04	4217.1	Filtered	1328.22	Filtered	4729.2	3144.22	2089.71	Filtered	2913.18	Filtered	2876.66	3828.88	5287.45	2931.81
O00462	Beta-mannosidase	3165.78	3399.62	4042.89	84783	4201.66	14192.6	14622.4	46001.4	32721.8	2187.07	10466.5	2314.04	3711.2	Filtered	21648.1	14532.3	7609.86	6228.99	6578.43	44128.9	16161.6	30993.2	Filtered	3876.71	14058.4	37872.7	15062.8	38803.8	16902.4	6821.7	2435.86	6507.63
O00468	Agrin	1362	778.359	1189.08	5413.12	2126.19	2264.32	5629.62	5643.04	3173.97	Filtered	Filtered	6382.05	2865.87	2148.74	20025.5	18968.6	Filtered	4197.47	Filtered	Filtered	Filtered	Filtered	798.037	4313.32	7768.07	34749.7	Filtered	5052.33	Filtered	7594.01	3663.55	3334.7
O00487	26S proteasome non-ATPase regulatory subunit 14	7940.06	9588.89	7277.07	18589.9	10430.9	13808	15801.3	11599.7	15174.4	16635.4	14078.1	15212.2	9767.27	12248.1	12986.2	25308.6	13833.9	10139.1	12603	31013.1	25806.1	Filtered	7341.61	15654.6	18034.9	Filtered	25212.8	Filtered	17087.6	18684.2	5298.16	16049.5
O00534	von Willebrand factor A domain-containing protein 5A	11695.6	11995.8	9999.34	15149.7	15145.3	11811.9	25751.5	22584.1	11178.5	11909.8	24258.5	15603.7	24869.9	21704.6	33728.3	29401.3	14188.5	19269.5	24830.2	23452.9	21543.4	19832.8	20293.4	12158.1	9146.2	Filtered	21651.7	28225.7	20403.3	31102.8	14354.2	18445.2
O00560	Syntenin-1	1618.61	2774.35	520.599	Filtered	Filtered	Filtered	Filtered	Filtered	2975.07	1238.59	Filtered	Filtered	Filtered	Filtered	Filtered	Filtered	7592.04	5572.12	2518.41	Filtered	Filtered	Filtered	Filtered	Filtered	10023.3	34930.3	Filtered	Filtered	10975.8	6190.05	4351.9	6437.81
O00571	ATP-dependent RNA helicase DDX3X	5990.38	2157.57	8438.11	9329.1	3447.93	2028.07	6046.04	Filtered	6360.25	7000.77	10450.9	10799.8	11096.2	5077.62	8028.57	1775.4	3871.98	8777.48	11094.7	3653.02	6679.02	5915.66	9051.91	6160.96	3435.2	Filtered	9357.12	Filtered	7386.64	7907.16	5489.45	9622.13
O00584	Ribonuclease T2	16747.1	21116.8	12520.5	63721.9	30042.7	22293.5	55272.7	52090	17347.4	34248	78184	16251.7	22899.5	11571	80737.1	76782.2	21798	21075.3	24954.1	136804	44497.9	137523	10547.1	20863.7	50487.6	239401	42836.7	226179	89080.5	38934.7	20323.3	55746.8
O00592	Podocalyxin	11299.6	35095.8	7656.35	54395.6	33240.9	26480.6	22782.6	23452.6	4563.08	9931.57	8509.98	11658.5	30560.8	8416.17	111617	151177	68333.2	42898.2	28787.3	111889	66526.2	200349	27331.2	20246.2	Filtered	Filtered	41114.2	91437.6	56263.7	19679.5	6578.41	Filtered
O00629	Importin subunit alpha-4	1555.53	3756.64	2470.39	13616.4	Filtered	5843.69	2049.54	Filtered	6099.31	4792.72	4282.5	4072.54	7133.24	3557.45	Filtered	Filtered	Filtered	6563.11	4780.26	13082.6	Filtered	Filtered	Filtered	Filtered	Filtered	Filtered	Filtered	Filtered	Filtered	9380.42	1729.81	8089.79
O00743	Serine/threonine-protein phosphatase 6 catalytic subunit	750.192	3230.14	Filtered	Filtered	Filtered	2100.47	Filtered	Filtered	2500.6	Filtered	Filtered	782.289	2004.04	2614.15	2851.65	Filtered	Filtered	560.456	526.28	Filtered	Filtered	Filtered	3307.22	4191.87	Filtered	Filtered	Filtered	Filtered	Filtered	1123.07	2249.54	Filtered
O00754	Lysosomal alpha-mannosidase	2917.81	Filtered	2407.61	8839.84	4142.52	Filtered	Filtered	Filtered	3156.86	953.79	Filtered	Filtered	8901.88	10023.1	Filtered	Filtered	9691.5	4004.05	4336.57	Filtered	Filtered	Filtered	5745.4	10677.2	13369.9	22698.1	5905.16	Filtered	Filtered	6314.63	6732.98	10022
O00757	Fructose-1,6-bisphosphatase isozyme 2	102899	126071	100744	163114	67701.3	84045.4	254596	308314	100041	121605	109452	188639	84302.5	95506.9	198049	163750	195078	196483	132590	189592	189539	173602	117601	76444.1	48691.5	129258	90509.2	190615	131687	116478	211641	271382
O00764	Pyridoxal kinase	26090.5	25952.3	23360.8	32825.9	31559.4	16074.3	56090.8	52354.4	21278	47486.3	28120.7	31908.3	44613.1	36251.7	61810.5	57673.2	56863.8	38278.1	29690.6	49440.7	44539.9	Filtered	31502.4	41234.4	36695.5	Filtered	46452.3	56329.1	71179.4	46240.9	36918.2	64518.8
O14561	Acyl carrier protein, mitochondrial	1735.27	Filtered	3542.28	Filtered	2200.44	2814.98	Filtered	Filtered	831.821	909.7	1636.12	1008.6	1945.04	3860.78	Filtered	Filtered	1917.1	2744.57	2907.02	Filtered	Filtered	Filtered	4776.82	2566.72	4342.12	Filtered	4015.59	Filtered	Filtered	1027.68	7957.76	834.701
O14579	Coatomer subunit epsilon	3876.89	8813.4	8601.07	18353	7476.34	Filtered	7116.22	14839.1	11012.8	9334.61	16091.2	10090.9	6014.84	2347.65	Filtered	Filtered	11748.7	12913.9	11020.8	24994	17407.4	Filtered	2748.2	Filtered	9464.2	Filtered	8113.77	Filtered	8811.02	15109.8	5040.17	8216.78
O14737	Programmed cell death protein 5	5775.27	4643.75	9008.49	6328.21	9341.7	12684.5	16822.5	8080.93	13763.5	12119.7	6084.09	10340.5	17060.8	5697.03	Filtered	Filtered	13148.6	15241.1	Filtered	Filtered	Filtered	Filtered	5560.12	7418.89	Filtered	Filtered	14468.4	Filtered	Filtered	Filtered	5196.48	9508.39
O14745	Na(+)/H(+) exchange regulatory cofactor NHE-RF1	15910.6	25363.1	13986	28619.4	31465.8	21563.7	41026.6	71103.9	25678	32169.6	32934.8	37913.4	25262.7	20743.6	54618.4	60091.4	37062	27554.4	28358.3	68457.8	75723.5	91368.4	26345	24277.6	31497	121361	26722.7	162138	37852.1	44168.3	23488.4	36157.8
O14773	Tripeptidyl-peptidase 1	7453.23	13025.4	7277.28	13553.9	8215.75	6243.22	16061.4	20354.1	5611.72	8188.52	16465.9	8041.26	10045.9	6886.2	18591.2	24102.2	11728.3	12190.2	11836.4	34986	12728.6	55624.3	8645.58	10755	18923.2	117922	16168.9	63311.4	34144.3	15203.3	12028.6	14773.4
O14791	Apolipoprotein L1	27571.6	17167.6	Filtered	Filtered	20358.3	21415.2	Filtered	Filtered	4240.59	14419.3	Filtered	Filtered	5013.36	Filtered	Filtered	Filtered	10228.6	Filtered	Filtered	Filtered	15677.8	18696.2	21842.6	17745.2	55605.3	148882	13835.7	Filtered	Filtered	Filtered	10891.1	Filtered
O14818	Proteasome subunit alpha type-7	37138.4	46192.9	44274.8	58917.7	46322.1	43706.3	69626.8	65180.5	59017.2	50374.8	56219.2	52346.8	57059.1	49902.2	69245	41327.2	51033.3	51795.7	56749.2	65375.6	55814.1	20667.2	61501.7	56439.1	50856.7	118584	72151.5	155123	49553.2	54501.5	71689	70736.1
O14841	5-oxoprolinase	3341.97	5847.92	2059.24	917318	3328.93	3989.93	2559.53	5578.18	2199.52	2166.09	6170.07	2999.78	3713.08	2584.89	1.22679e+06	373004	4798.17	4414.87	4206.63	20647.3	14484	Filtered	2246.38	2476.65	Filtered	Filtered	6028.36	12096.5	3647.67	1198.78	246489	3919.11
O14879	Interferon-induced protein with tetratricopeptide repeats 3	1999.64	1598.17	1519.78	Filtered	Filtered	Filtered	Filtered	Filtered	556.472	Filtered	1382.64	192.726	12583.6	14942.5	Filtered	Filtered	Filtered	Filtered	Filtered	Filtered	Filtered	Filtered	3908.88	6881.34	Filtered	Filtered	5001.14	Filtered	Filtered	1548.11	5288.42	6672.55
O14907	Tax1-binding protein 3	8544.03	3376.98	13931	4933.68	3097.22	Filtered	4939.39	Filtered	11564.1	4640.06	2040.61	8996.16	4207.72	2627.15	Filtered	Filtered	3027.32	4884.36	4298.84	Filtered	Filtered	Filtered	4876.23	Filtered	Filtered	Filtered	Filtered	Filtered	Filtered	9711.66	2718.24	4036.05
O14908	PDZ domain-containing protein GIPC1	2695.3	2896.1	6386.49	11213.7	4550.47	5259.92	9410.22	7298.74	5777	2947.95	7883.06	7196.84	7960.39	5590.48	6664.59	5961.79	5591.47	9823.78	9336.04	6018.67	7162.14	2160.44	5152.28	3398.28	841.065	Filtered	2552.88	1698.55	6727.4	10564.5	2677.04	9140.49
O14933	Ubiquitin/ISG15-conjugating enzyme E2 L6	5355.03	6318.87	3866.44	4205.41	2940.66	4088.16	3439.32	3891.45	2767.4	6847.33	6802.99	3954.62	16631.9	15675.2	8235.22	9151.4	7542.19	4811.5	5591.77	4788.69	11819.5	Filtered	10073.4	13155.9	2023.09	Filtered	20225.6	21661.8	6377.22	7957.75	8767.48	11839.5
O14950;P19105	Myosin regulatory light chain 12B;Myosin regulatory light chain 12A	75462.4	93806.2	32809.5	130069	98312.7	97633.6	87715.8	45549.7	92613	92278.4	115281	83412.7	82075.4	73154.8	141937	132355	110021	92950.2	98963.6	106208	73542.1	78654.9	67585.2	62479.1	110034	81975.5	75109.8	82982.2	61383.1	54340.7	39670.5	85763.3
O14972	Down syndrome critical region protein 3	Filtered	Filtered	1369.56	Filtered	Filtered	640.992	Filtered	Filtered	638.698	Filtered	Filtered	Filtered	Filtered	507.863	Filtered	Filtered	Filtered	Filtered	454.807	Filtered	Filtered	Filtered	Filtered	Filtered	Filtered	Filtered	Filtered	Filtered	Filtered	Filtered	Filtered	Filtered
O14979	Heterogeneous nuclear ribonucleoprotein D-like	15521.7	15179.7	7050.88	5788.33	12368.3	12088.2	7103.61	5782.97	8171.65	14345.3	10227.8	6801.54	10068.1	10291	2564.75	18638.8	6689.9	16058.8	17552.8	11637.4	7878.74	4951.07	12587.8	8292.19	30954.7	5718.76	18440.7	Filtered	11609.3	16492.5	12008.7	4640.28
O14980	Exportin-1	4501.58	4388.83	3398.76	4791.73	2991.3	2860.13	Filtered	1359.65	2448.43	3075.03	2535.09	3499.39	2598.96	2588.52	2765.65	3413.67	2873.08	3366.39	5166.09	9479.91	3754.71	Filtered	5373.5	5174.99	3953.3	Filtered	4987	Filtered	2728.42	2392.19	1848.34	3075.53
O15020	Spectrin beta chain, non-erythrocytic 2	5759.94	10330.1	4044.02	Filtered	1426.74	Filtered	Filtered	Filtered	3663.81	Filtered	Filtered	1441.64	Filtered	Filtered	Filtered	5638.69	Filtered	12151	5199.57	Filtered	33610.9	Filtered	3857.91	Filtered	17867.8	Filtered	Filtered	Filtered	9634.23	41887.9	Filtered	33015.5
O15041	Semaphorin-3E	Filtered	Filtered	Filtered	Filtered	Filtered	Filtered	Filtered	Filtered	Filtered	Filtered	1726.54	Filtered	Filtered	Filtered	Filtered	Filtered	Filtered	Filtered	Filtered	3850.82	Filtered	Filtered	Filtered	Filtered	Filtered	Filtered	Filtered	5025.34	Filtered	Filtered	Filtered	Filtered
O15067	Phosphoribosylformylglycinamidine synthase	3289.99	3755.56	2813.41	2333.39	3761.08	1964.09	885.109	Filtered	2905.05	3971.45	Filtered	3810.97	2005.56	1393.87	3198.77	Filtered	4601.16	4739.97	3159.68	Filtered	4204.35	Filtered	1140.01	683.731	2520.37	Filtered	3827.82	Filtered	3058.81	3041.42	1731.9	2729.55
O15084	Serine/threonine-protein phosphatase 6 regulatory ankyrin repeat subunit A	Filtered	674.475	732.298	Filtered	573.346	1811.8	Filtered	Filtered	Filtered	Filtered	Filtered	589.183	759.347	580.12	Filtered	Filtered	1696.22	766.652	Filtered	Filtered	Filtered	Filtered	Filtered	Filtered	Filtered	Filtered	Filtered	Filtered	Filtered	2190.42	Filtered	Filtered
O15116	U6 snRNA-associated Sm-like protein LSm1	Filtered	3035.48	1156.12	4676.68	Filtered	Filtered	Filtered	4157.02	813.859	Filtered	1756.92	2064.58	Filtered	1786.35	Filtered	Filtered	Filtered	Filtered	1475.42	Filtered	Filtered	Filtered	Filtered	Filtered	Filtered	Filtered	Filtered	Filtered	Filtered	2433	1963.54	4917.22
O15143	Actin-related protein 2/3 complex subunit 1B	11972.6	12283.2	16426	14367.2	21592.7	25013.6	49777.2	11719.8	28132.3	50447.1	55487.8	17231.3	30264.9	36480.4	21919.9	88249.6	22740.3	33734.1	35716.1	257648	52854.3	582227	23065.9	38439	20386.4	Filtered	26403.6	17844.7	26961.8	32904.8	22652.9	25001.8
O15144	Actin-related protein 2/3 complex subunit 2	19211.9	17368.9	22604.6	21612.6	18142.3	17390.3	36783.3	27282.6	19002.3	20524.6	23471.1	22300.5	28723.2	27664.5	21968.3	25838.6	31782.3	32636.5	39639.3	31305.4	26464.9	21068.8	32104.2	35809.8	23837.1	49086.2	29197.7	33108.6	26530.9	34131.4	37705.9	31163.1
O15145	Actin-related protein 2/3 complex subunit 3	32367.6	27409.6	30889.4	64287.6	31165.8	52684.3	64724.5	72836.3	27164.7	22421.5	34017.8	25047.2	36094.9	62702.2	124975	56558.9	79947	81532.5	39265.1	121087	137345	61559.2	132577	93151.1	87591.3	132428	54050.6	135510	77217.5	80774.1	70763.3	66152.1
O15198;P84022;Q15796	Mothers against decapentaplegic homolog 9;Mothers against decapentaplegic homolog 3;Mothers against decapentaplegic homolog 2	5567.92	1003.85	4607.21	Filtered	Filtered	Filtered	Filtered	Filtered	3455.94	8340.63	3880.18	9877.51	Filtered	Filtered	Filtered	Filtered	8109.05	7783.58	9856.38	Filtered	Filtered	Filtered	9370.98	5430.88	Filtered	Filtered	10425.9	Filtered	Filtered	6825.83	3769.98	10737.3
O15212	Prefoldin subunit 6	10868.1	15350.4	9506.26	21825.9	12406.7	11004.3	25056.1	20197	13353.3	10250.6	11906.1	13122.7	12738.2	12322.7	Filtered	Filtered	10838.6	17072.8	Filtered	Filtered	Filtered	Filtered	7601.26	6378.25	Filtered	Filtered	Filtered	Filtered	Filtered	Filtered	10932.6	15110
O15231	Zinc finger protein 185	21800.9	15160.3	21412.1	18501.9	8455.18	21176.3	19536.8	17295.4	13264.5	10008.8	10174.5	12829.5	7611.14	9931.22	2848.65	12664.3	8803.57	16399.6	21808.4	18333.7	24907.3	13072.1	5914.02	Filtered	28326.8	Filtered	8230.69	29779	18742.9	20437.1	9512.84	12603.2
O15264	Mitogen-activated protein kinase 13	4991.83	8007.05	4469.43	8876.4	3284.77	Filtered	12567	Filtered	6777.59	10642.5	19127.6	8694.97	22060.5	7364.53	Filtered	Filtered	17323.1	24402.4	17382.2	8771.97	Filtered	36462.1	16147.5	12383.4	Filtered	Filtered	13359	Filtered	Filtered	14268.4	21071.7	9786.49
O15305	Phosphomannomutase 2	3144.68	3452.45	4408.15	7271.15	3326.63	10143.5	6133.37	Filtered	2794.83	6534.02	11708.5	7100.9	5347.21	5330.39	7926.56	5612.49	4721.48	5492.32	10804.2	10347.7	16280.3	Filtered	4060.54	1530.46	2605.28	Filtered	5708.66	6467.77	8001.19	6328.12	5388.89	9401.34
O15335	Chondroadherin	Filtered	Filtered	Filtered	Filtered	Filtered	Filtered	Filtered	Filtered	Filtered	Filtered	Filtered	Filtered	Filtered	Filtered	Filtered	Filtered	697.503	Filtered	581.638	4393.21	Filtered	Filtered	Filtered	Filtered	Filtered	Filtered	Filtered	Filtered	Filtered	Filtered	Filtered	Filtered
O15371	Eukaryotic translation initiation factor 3 subunit D	2195.78	4606.93	3237.95	Filtered	Filtered	Filtered	Filtered	Filtered	1582.26	Filtered	Filtered	Filtered	2722.02	Filtered	Filtered	Filtered	4550.9	Filtered	7443.8	Filtered	Filtered	Filtered	954.111	3062.88	Filtered	Filtered	5608.35	Filtered	Filtered	7880.91	1	Filtered
O15372	Eukaryotic translation initiation factor 3 subunit H	1593.89	1420.68	1681.27	1850.32	Filtered	1636.69	Filtered	Filtered	2890.8	2115.89	4790.44	2342.74	3344.29	2350.32	Filtered	Filtered	1674.36	4165.77	3185.55	Filtered	Filtered	Filtered	4640.11	2217.44	3030.17	Filtered	Filtered	Filtered	Filtered	1636.28	369.932	1202.8
O15498	Synaptobrevin homolog YKT6	4242.8	5049.51	3476.3	Filtered	3715.9	3907.01	8875.42	Filtered	2085.95	4872.21	3096.48	3642.09	3902.37	3696.11	Filtered	Filtered	4586.75	6144.64	5599.92	Filtered	Filtered	Filtered	5257.3	4047.57	Filtered	Filtered	Filtered	Filtered	6063.7	3715.88	6369.05	6101.14
O15511	Actin-related protein 2/3 complex subunit 5	27681.6	10635.5	34156.8	74179.6	75857.3	58209.1	125352	75122.7	34736.2	53490.9	67485.1	34649.7	65261.3	59938.4	57903.4	129524	92429.9	97522.3	77114.8	147212	17437.9	97522.4	87273.8	64033.5	60963	Filtered	38307.2	Filtered	53518.8	80780.5	61461.9	77260.6
O43143	Putative pre-mRNA-splicing factor ATP-dependent RNA helicase DHX15	2269.91	1177.97	1411.24	Filtered	1083.83	Filtered	Filtered	Filtered	939.407	Filtered	Filtered	Filtered	514.925	662.701	Filtered	Filtered	1055.05	Filtered	2016.96	1614.19	Filtered	Filtered	1248.91	1303.21	Filtered	Filtered	Filtered	Filtered	Filtered	2894.14	1273.73	Filtered
O43150	Arf-GAP with SH3 domain, ANK repeat and PH domain-containing protein 2	Filtered	Filtered	Filtered	Filtered	Filtered	Filtered	Filtered	Filtered	Filtered	Filtered	Filtered	137.296	Filtered	Filtered	Filtered	Filtered	Filtered	Filtered	Filtered	Filtered	Filtered	Filtered	Filtered	Filtered	Filtered	Filtered	Filtered	Filtered	Filtered	Filtered	Filtered	2838.89
O43175	D-3-phosphoglycerate dehydrogenase	42569.8	55049.3	13760.6	25641.9	30090.2	34025.9	34331.7	45060.3	20509.8	49053.2	53828.8	55303.2	20713.6	15356.3	99842.9	142988	59114.2	33857.1	24406.3	97289.6	39832	35191.2	18738.6	11901.5	47733.8	57917	44304.1	69196.5	36570.1	22194.6	23714.8	28921.5
O43237	Cytoplasmic dynein 1 light intermediate chain 2	3629.7	3618.78	2011.79	Filtered	1035.11	3172.01	Filtered	2484.34	2664.05	2213.13	3684.02	2556.07	Filtered	Filtered	Filtered	Filtered	4349.99	1606.86	3491.4	Filtered	2741.94	Filtered	2416.38	2656.25	2400.54	Filtered	Filtered	Filtered	Filtered	671.043	Filtered	2296.58
O43242	26S proteasome non-ATPase regulatory subunit 3	10241.9	8792.9	10575.1	10289.4	7684.79	6768.61	2901.59	2145.84	7619.58	8568.34	10013.2	11632.9	12273.9	7595.7	11940.6	5833.14	4416.97	9229.01	12394.8	14265	11015.5	Filtered	8232.01	8820.62	8723.78	Filtered	9547.98	Filtered	9836.31	11690.7	5552.62	3885.2
O43324	Eukaryotic translation elongation factor 1 epsilon-1	3213.03	5714.69	2958.75	Filtered	9560.34	1488.41	Filtered	Filtered	4235.56	4757.1	2199.37	3066.7	3622.65	Filtered	Filtered	Filtered	Filtered	Filtered	2891.09	Filtered	Filtered	Filtered	Filtered	Filtered	Filtered	Filtered	Filtered	Filtered	Filtered	Filtered	Filtered	2133.19
O43390	Heterogeneous nuclear ribonucleoprotein R	2036.53	1330.66	814.353	Filtered	Filtered	Filtered	Filtered	Filtered	Filtered	2389.93	Filtered	882.075	Filtered	Filtered	Filtered	Filtered	Filtered	Filtered	2779.72	Filtered	Filtered	Filtered	Filtered	2103.93	Filtered	Filtered	Filtered	Filtered	Filtered	Filtered	Filtered	Filtered
O43396	Thioredoxin-like protein 1	11449.1	19262.1	11760.9	21696.1	13383.5	13799	17039.9	10967.2	13879.5	10509.5	17018.2	12449.9	12751.7	12118.7	22255.7	15397.5	16297.4	18037.1	15629.1	1469.38	9639.88	Filtered	17851.8	13527.2	7758.03	Filtered	17962.1	Filtered	9346	15429.5	17983.1	17291.6
O43399	Tumor protein D54	1768.85	Filtered	5289.06	8956.38	3375.97	Filtered	2566.94	Filtered	1276.45	Filtered	3587.87	9972.67	5092.99	6786.83	Filtered	10671.8	9907.51	10281.7	11747.2	Filtered	Filtered	Filtered	Filtered	3455.4	Filtered	Filtered	Filtered	Filtered	Filtered	Filtered	5587.38	8191.39
O43405	Cochlin	4250.18	6116.22	4184.77	10460.2	8352.7	9474.12	12539.1	19977.3	16729.1	12005.9	24065.2	31203.6	5391.54	10942	25088.9	56544	18669.3	48286.7	9360.73	59259.7	35252.6	Filtered	26817.2	10331.4	14274.1	73622	14232.6	85251.2	12094.6	35361.9	10832.3	13299.8
O43447	Peptidyl-prolyl cis-trans isomerase H	Filtered	16928.1	5973.47	Filtered	Filtered	5623.15	Filtered	Filtered	4349.21	Filtered	Filtered	7533.8	Filtered	Filtered	Filtered	Filtered	10304.4	9977.21	13568.2	Filtered	Filtered	Filtered	11689.8	8081.13	Filtered	Filtered	Filtered	Filtered	Filtered	Filtered	12090	Filtered
O43488	Aflatoxin B1 aldehyde reductase member 2	30456.6	27131.3	23608.7	44275.4	36295.9	39474	63577	53405.1	39139.5	44680.9	26227.3	51898.8	30799.1	27648.2	31221.9	25605.8	39080.1	37456.4	48108.7	32710.5	27223.4	13343.1	21762.8	24549.8	17513.8	28644.1	23566.9	Filtered	30044.2	14058.7	25565.3	34996.9
O43490	Prominin-1	2998.88	5672.41	1568.57	9108.36	8319.26	5232.64	7643.54	10350.2	4796.65	4307.76	3378.42	2537.02	3731.2	722.668	8392.82	12382.4	5976.85	4612.96	6412.46	21148.3	25987.6	92656.5	1688.58	6402.79	6916.5	28161.6	9268.12	42727	12210.1	14059.2	4490.73	3696.46
O43504	Hepatitis B virus X-interacting protein	Filtered	Filtered	2964.7	Filtered	Filtered	Filtered	Filtered	Filtered	Filtered	Filtered	Filtered	807.773	511.211	Filtered	Filtered	Filtered	Filtered	1335.24	3496.31	Filtered	Filtered	Filtered	Filtered	Filtered	3519.82	Filtered	Filtered	Filtered	Filtered	Filtered	868.846	624.831
O43598	Deoxyribonucleoside 5'-monophosphate N-glycosidase	4665.03	6955.82	7540.88	12127	10162.7	9703.2	17654.1	28342.2	7791.52	10625.6	26828.6	9571.24	10443.3	18377.1	Filtered	Filtered	4340.79	13141.6	15367.8	Filtered	26568	38456.3	12198	12102.4	18329	Filtered	23742.6	Filtered	15572.9	14518.9	8796.15	12301.9
O43653	Prostate stem cell antigen	9554.04	42122.8	13577.6	29344.6	14309.6	4140.94	6523.28	8304.78	Filtered	Filtered	18419.6	20561.8	16666.9	5957.72	Filtered	Filtered	Filtered	Filtered	15810.4	30887.5	16667.1	13739.3	8114.95	3229.97	Filtered	Filtered	10207.4	16016.8	31406.1	52283.4	Filtered	Filtered
O43681	ATPase ASNA1	6279.2	5678.62	4050.19	10942.5	10385.9	Filtered	Filtered	Filtered	6017.09	6815.7	Filtered	7682.83	3059.1	2832.48	Filtered	Filtered	6679.15	627.164	3910.86	Filtered	Filtered	Filtered	5060.97	1696.41	Filtered	Filtered	Filtered	Filtered	Filtered	Filtered	22009.8	4061.2
O43707	Alpha-actinin-4	213360	272333	293934	418429	193897	182753	486184	311873	234763	231313	227046	286829	216690	265032	313371	278889	276788	296345	397531	394790	370381	383433	224201	185677	287466	440170	462855	421737	377073	444606	377262	252937
O43708	Maleylacetoacetate isomerase	2202.94	1510.91	3122.22	4982.38	9767.55	3787.21	Filtered	Filtered	3577.37	2446.76	3339.77	2315.77	3093.78	2581.83	15433.6	23899.2	1095.21	2818.61	8788.9	Filtered	12393.4	18049.4	Filtered	3775.25	Filtered	Filtered	16840.9	Filtered	19039.9	6597.65	3181.55	3035.86
O43747	AP-1 complex subunit gamma-1	3836.53	2319.26	6793.17	6304.67	4433.42	3045.24	Filtered	6215.65	5859.9	6781.57	5505.45	6329.51	4026.56	3123.72	Filtered	Filtered	7402.95	9919.16	6060.11	Filtered	12914.5	Filtered	3632.42	3259.61	6928.5	Filtered	Filtered	Filtered	9755.78	6940.24	3526.65	1784.92
O43765	Small glutamine-rich tetratricopeptide repeat-containing protein alpha	7732.23	9003.73	3257.1	2861	1896.68	Filtered	Filtered	Filtered	1171.87	3335.14	Filtered	2247.8	2380.75	1103.22	Filtered	Filtered	1067.41	Filtered	1411.37	Filtered	Filtered	Filtered	1273.05	Filtered	Filtered	Filtered	Filtered	Filtered	Filtered	Filtered	1148.55	Filtered
O43768	Alpha-endosulfine	8756.22	14257.1	8732.59	19899.6	9106.72	16434.5	16256.3	21675.4	13468.7	15482.8	16013.4	17357.6	12555.1	11269.9	31628.4	57047.8	10905.1	21621	23521.9	58886	29773.7	49828.5	3960.92	16013.7	27120.1	Filtered	30547.9	136002	43846.5	16746.7	4099.73	17332.1
O43776	Asparagine--tRNA ligase, cytoplasmic	14162.3	21461.5	15225.3	37345.9	20131.4	16490.4	17242.1	16349.4	24698.5	24351.6	34706.6	30906.8	24729.6	25179.8	23619.2	25723.9	21732.3	21181.5	22653.8	55430.4	16254.1	Filtered	20596.7	15993.4	19341.4	26692	17437	Filtered	19793.4	30496.3	17292.1	26670
O43809	Cleavage and polyadenylation specificity factor subunit 5	Filtered	2342.83	1898.25	Filtered	Filtered	Filtered	Filtered	Filtered	Filtered	1678.61	Filtered	2474.46	887.071	Filtered	Filtered	Filtered	Filtered	1275.56	4615.71	Filtered	Filtered	Filtered	Filtered	Filtered	5817.83	Filtered	Filtered	Filtered	Filtered	Filtered	Filtered	Filtered
O43813	LanC-like protein 1	7751.61	11342.5	7870.44	16634.7	10106.2	15948.4	14924.2	17019.5	11197.1	13641.7	11584.5	11227.2	12054.8	7707.78	12764	16710.4	11060	13163.8	18024	25654.7	19654.9	14664.8	8503.04	9804.98	12157	Filtered	15439.6	17176.9	13608.2	13377.7	12292.6	18754.2
O43852	Calumenin	19048.8	42112.5	20308.2	78890.8	42297.7	54239.7	85514.3	117643	30984	50905.5	86322.7	50568.6	36484.8	26136.9	143596	181712	67615.9	48273.9	47674.6	302386	146251	255691	33451.3	39991.2	138481	545320	99052.4	732202	157501	109561	39754.4	69681.9
O43865	Putative adenosylhomocysteinase 2	1905.83	1191.91	9861.88	Filtered	Filtered	2972.9	Filtered	Filtered	20360.3	19753	Filtered	22431.7	25673.9	14322.3	Filtered	Filtered	Filtered	Filtered	Filtered	Filtered	Filtered	Filtered	1142.62	17307	Filtered	Filtered	Filtered	Filtered	Filtered	Filtered	1620.58	Filtered
O43866	CD5 antigen-like	16820.3	2938.18	Filtered	Filtered	9588.29	22693.8	Filtered	Filtered	11995.9	2500.83	Filtered	Filtered	2601.44	3595.76	Filtered	Filtered	782.592	Filtered	Filtered	Filtered	15345.2	6779.14	36944.5	21625.7	27998.9	46401.5	4216.31	Filtered	Filtered	Filtered	27626.4	4653.75
O60256	Phosphoribosyl pyrophosphate synthase-associated protein 2	915.602	2051.76	880.636	4026.02	646.881	591.968	Filtered	Filtered	1551.14	944.379	4329.53	4229.93	2833.66	11019.2	Filtered	9513.92	2183.76	Filtered	3966.61	Filtered	Filtered	Filtered	6348.03	1045.35	7595.58	Filtered	6213.6	Filtered	Filtered	2210.1	1434.02	Filtered
O60271	C-Jun-amino-terminal kinase-interacting protein 4	Filtered	1809.7	1173.09	2512.2	Filtered	Filtered	Filtered	Filtered	829.6	Filtered	Filtered	Filtered	Filtered	Filtered	Filtered	Filtered	Filtered	Filtered	Filtered	Filtered	Filtered	Filtered	Filtered	1533.39	Filtered	Filtered	Filtered	Filtered	Filtered	Filtered	Filtered	2020.32
O60437	Periplakin	10009.6	9627.5	26506.5	6926.17	7017.18	13367.1	18344	12500.3	14773.9	8568.22	4659.69	12942.2	5490.5	6714.26	15837.1	1669.96	9381.41	21697.4	26725.8	12720.9	18185.9	26753	5728.5	2808.48	40353.1	24039.3	8020.52	Filtered	13782.4	26495.2	17470.8	11498.1
O60506	Heterogeneous nuclear ribonucleoprotein Q	10539.9	5365.96	6882.19	Filtered	5317.38	1249.83	2774.66	Filtered	3169.17	5574.86	Filtered	234.07	7960.12	5788.95	Filtered	Filtered	5525.64	19777.7	9243.67	Filtered	6464.12	Filtered	14352.2	4427.42	24733.8	Filtered	31085.3	Filtered	Filtered	10968.5	6063.52	8758.01
O60547	GDP-mannose 4,6 dehydratase	58778.3	78154	54356.5	74515.3	72733.2	70600.1	133365	109603	62512	82466.7	93983.2	111424	69585.7	84360.2	105353	102512	80435.6	104843	97425.5	65452.9	89226.9	74855.3	55628.6	45942.5	49393.8	139355	67491.2	170431	76664.8	62698.5	84491	122664
O60610	Protein diaphanous homolog 1	18761.8	30366.3	29810.2	41826	25285.8	6595.99	32778.7	8199.73	18840.7	24308.9	12323.8	37764.9	45248.4	49163.5	19683.2	13395.2	25352.7	62654.4	41740.5	28412.2	23264.8	22751.4	28915.2	28020.4	5871.92	23838.4	8858.76	25314.1	10897.1	9603.18	38353.8	16244
O60664	Perilipin-3	31018.7	36943.4	35058.8	47395.3	34686	33922.1	47788.8	55782.9	28759	37098.9	22830.3	30752.7	38446.9	31200.8	41414.7	32801.3	32381.5	35243.8	47629.2	45814.4	40577.4	37229.7	32899.4	25442.1	32704.7	58576.8	24726.1	73993.2	24509.3	16174.4	36590.7	43870.7
O60684	Importin subunit alpha-7	Filtered	10866.2	3117.91	Filtered	Filtered	Filtered	Filtered	Filtered	Filtered	Filtered	Filtered	Filtered	Filtered	667.377	Filtered	Filtered	Filtered	Filtered	3100.59	Filtered	Filtered	Filtered	Filtered	Filtered	Filtered	Filtered	Filtered	Filtered	Filtered	Filtered	396.841	4417.25
O60701	UDP-glucose 6-dehydrogenase	5173.87	9569.82	2203.79	6131.53	13689.3	6947.45	13179	8194.65	5018.04	7084.46	15111.7	9669.6	Filtered	9657.5	Filtered	Filtered	15378	12580.1	13362.9	16189	15158	14605.9	7713.54	3473.43	4344.5	Filtered	12983.7	35980.4	16306.9	12469.2	11678.4	13784.7
O60716	Catenin delta-1	4247.19	5038.99	5327.51	8603.97	2889.19	12580.4	4011.59	4794.8	6437.7	3330.39	5862.45	8464.81	1785.11	862.288	Filtered	Filtered	Filtered	2303.72	4942.12	Filtered	7761.24	3406.12	5588.83	576.929	8845.53	Filtered	97722.2	Filtered	7527.42	4486.58	4380.88	2748.87
O60749	Sorting nexin-2	15746	18658.8	15212.4	38892.5	22651.8	23861.8	20527.8	20375.6	15164	16790.4	22354.4	22663.7	28057.2	19116.1	30584.2	14492	20450.3	19859.9	23259.4	28097.4	35170.9	11011.1	18425.4	20162.5	19800.3	13259.2	25687.2	Filtered	26203.5	23792.7	18234.9	26343.8
O60763	General vesicular transport factor p115	12781.5	14017.8	15914.2	19644.7	4332.7	5437.82	2839.69	5043.75	13831	15720.8	6575.21	9821.38	12831.9	9892.41	Filtered	Filtered	6405.62	14535.8	15030.5	Filtered	23163.8	Filtered	11303.2	9609.8	9190.58	Filtered	12007.9	Filtered	21307	12450.5	10437.2	13464
O60784	Target of Myb protein 1	8873.64	14411.1	16348	23987	15024	7790.26	18237.3	11704.3	9355.71	9388.54	9672.63	14106.8	13841.8	11281.6	14770.3	13643.2	7692.86	13615.6	12667.5	9455.67	314324	2297.49	9970.5	7323.54	277243	Filtered	5205.34	8198.44	21320	14916.2	16950	22736.4
O60814;P57053;P58876;P62807;Q5QNW6;Q93079;Q99877;Q99879;Q99880	Histone H2B type 1-K;Histone H2B type F-S;Histone H2B type 1-D;Histone H2B type 1-C/E/F/G/I;Histone H2B type 2-F;Histone H2B type 1-H;Histone H2B type 1-N;Histone H2B type 1-M;Histone H2B type 1-L	12667.8	6851.3	8758.06	Filtered	30068.9	42534.9	51636.5	36089.1	6379.79	21777.9	13378.3	8828.08	32873	46282.7	27021.3	10300.5	90565.8	33136.7	15578.3	15464.6	19663	6460.7	31099.2	11055.8	45774.9	Filtered	25497.1	51860.8	25655.8	15176.6	22826.9	24115.7
O60825	6-phosphofructo-2-kinase/fructose-2,6-bisphosphatase 2	7460.24	7080.7	5656.82	20440.5	12125.1	8079.53	Filtered	Filtered	7238.84	10997.7	12797.1	3584.55	Filtered	2733.1	Filtered	Filtered	10009.7	8204.65	4731.55	Filtered	Filtered	Filtered	10080.9	Filtered	Filtered	Filtered	Filtered	Filtered	Filtered	11938	Filtered	Filtered
O60879	Protein diaphanous homolog 2	Filtered	15858.5	4740.95	2066.66	1224.11	Filtered	Filtered	Filtered	7611.98	Filtered	Filtered	5765.89	Filtered	736.636	Filtered	Filtered	Filtered	Filtered	6265.53	Filtered	Filtered	Filtered	Filtered	932.669	Filtered	Filtered	Filtered	Filtered	Filtered	3420.81	Filtered	Filtered
O60884	DnaJ homolog subfamily A member 2	Filtered	2902.35	726.4	4544.55	1	Filtered	Filtered	Filtered	1254.68	Filtered	Filtered	3092.74	1006.83	1935.36	Filtered	Filtered	Filtered	459.711	Filtered	Filtered	Filtered	Filtered	3340.93	2961.77	Filtered	Filtered	Filtered	Filtered	Filtered	Filtered	1914.35	4285.79
O60888	Protein CutA	116715	56825.8	39153.5	83226.1	153181	132703	345944	258611	103850	152318	77708.3	36125.7	126427	41628.9	177220	202829	99501.8	60692.6	53217.3	310317	162346	318951	94838.6	64512.7	81391.6	383264	81344.5	198376	180019	83875.2	153669	104974
O60911	Cathepsin L2	Filtered	Filtered	Filtered	Filtered	Filtered	Filtered	Filtered	Filtered	Filtered	Filtered	Filtered	Filtered	Filtered	Filtered	Filtered	Filtered	Filtered	7149.36	775.094	Filtered	Filtered	Filtered	Filtered	Filtered	Filtered	Filtered	Filtered	Filtered	Filtered	Filtered	Filtered	20966.9
O60925	Prefoldin subunit 1	17175.7	11787.4	11018	15434.7	10634.6	Filtered	Filtered	Filtered	6663.21	12913.5	Filtered	Filtered	Filtered	12776.9	Filtered	55721.8	10220.8	21555.5	Filtered	Filtered	12566.9	Filtered	12797.1	4145.82	Filtered	Filtered	13430.5	Filtered	Filtered	10168.5	10494.7	17356.6
O60927	Protein phosphatase 1 regulatory subunit 11	Filtered	Filtered	Filtered	Filtered	Filtered	Filtered	Filtered	Filtered	Filtered	Filtered	Filtered	596.359	Filtered	289.05	Filtered	Filtered	Filtered	Filtered	Filtered	Filtered	Filtered	Filtered	Filtered	Filtered	Filtered	Filtered	Filtered	Filtered	Filtered	Filtered	Filtered	Filtered
O60936	Nucleolar protein 3	2031.98	1417.19	2790.53	3396.31	Filtered	Filtered	Filtered	Filtered	Filtered	2103.18	Filtered	1929.99	1336.64	2738.62	Filtered	Filtered	Filtered	1242.41	2959.01	Filtered	Filtered	Filtered	Filtered	Filtered	Filtered	Filtered	Filtered	Filtered	968.844	Filtered	Filtered	Filtered
O75083	WD repeat-containing protein 1	86541.6	112724	112668	158762	95941.4	88498.6	147707	118125	95908.2	126273	113714	130320	109057	85141.8	155749	154692	125245	130721	113100	127616	121029	107174	86680.9	83933.3	80685.4	43855.5	115578	151807	149886	119398	164272	168693
O75084;Q14332	Frizzled-7;Frizzled-2	4208.56	7631.18	2078.3	5902.79	6589.96	8630.47	9958.26	14674.9	3322.3	4707.73	Filtered	3168.93	6897.43	5728.53	35590.5	34550.4	4241.6	4763.75	Filtered	12704.7	11861.9	20113.4	5821.82	6342.93	Filtered	Filtered	4950.84	18296.7	11491.5	8036.8	3760.4	4179.11
O75116	Rho-associated protein kinase 2	2977.62	3857.89	1499.86	1783.24	3299.1	3345.48	3098.68	4081.04	4168.47	4337.42	4034.05	3346.55	Filtered	1925.66	Filtered	Filtered	Filtered	3997.43	2620.44	5284.14	3356.54	4407.13	Filtered	Filtered	2146.87	Filtered	2575.99	Filtered	Filtered	Filtered	Filtered	Filtered
O75131	Copine-3	4369.93	8148.61	3721.21	5181.7	9507.11	5821.92	10687.4	10983.9	9249.14	5172.96	8304.71	6097.02	3556.94	3400.31	8938.87	Filtered	8709.88	10855.2	3370.85	7543.48	3012.74	Filtered	6904.33	3070.24	7296.7	Filtered	6710.03	Filtered	4605.74	5793.84	Filtered	1824.56
O75223	Gamma-glutamylcyclotransferase	11524.3	14874.2	16251.8	35852.7	14432.8	12795.7	22516	35615	40684.8	18516.5	29322.3	18513	18041	9212.48	18931.4	23062.3	23809.4	19591	26621.3	21887.3	23649.3	Filtered	12829.1	12202.8	22932.2	52690.5	12937.8	58675.2	61575	14711.6	23005.7	63592.6
O75340	Programmed cell death protein 6	3959.47	5767.6	4968.58	2961.78	Filtered	Filtered	2636.83	5143.85	10354.4	5640.94	Filtered	5235.67	1822.37	1067.04	4381.98	Filtered	3553.91	2840.25	2306.47	Filtered	4564.7	Filtered	Filtered	4995.26	Filtered	Filtered	4154.2	Filtered	Filtered	1939.22	2244.47	4277.71
O75347	Tubulin-specific chaperone A	8719.85	11130	9291.07	12799.9	11610.6	12651.8	21574.7	17042.6	11836.5	14370.7	12303.4	24228.1	18097.7	11135.9	27809.5	40860.4	17117.1	18699.5	24074.3	28835.8	23112.2	Filtered	11411.8	12623.1	Filtered	Filtered	17179.1	20496.5	8962.19	14942.7	18687.8	15179.4
O75348	V-type proton ATPase subunit G 1	7599.61	17891.2	15123.3	17023.6	12726.9	13872.2	16448.3	19015.6	13148.1	10378.1	17792.3	19590	15008.3	14377.8	18872.6	10945.1	15510	20389.4	18025.1	Filtered	12281.8	12825.3	12497.4	10166.6	8605.32	Filtered	12856.2	22611.2	20251.3	13924.5	11859.8	14025
O75351	Vacuolar protein sorting-associated protein 4B	25872.3	26880.9	26398.1	36026.8	18856.7	23913.1	19630.3	11958.6	23629.8	22857.7	28568	28098.6	24193.3	23326.7	10199.3	10484.3	25729.8	33315.7	30789.1	24565.6	24715.2	Filtered	24777.6	21869.3	19254.9	Filtered	31321.6	26454.8	27169.8	30066.1	38080.4	36111.7
O75363	Breast carcinoma-amplified sequence 1	14517.2	22480.8	22145.7	19153.6	13825.7	11639	23049.1	21970.3	29415.4	33691.4	10149	36118.3	6115.55	8863.27	6504.33	11868.1	14900	14128.1	24634.8	12821.8	6048.33	3428.13	8290.22	3941.72	6311.44	Filtered	15648.8	Filtered	25982.5	22659.7	11749.5	20566.2
O75367	Core histone macro-H2A.1	13288.2	8324.26	2385.33	Filtered	11438.7	12259.9	Filtered	Filtered	Filtered	Filtered	14928	Filtered	9105.32	6125.05	Filtered	Filtered	17721.1	37596.1	2373.57	Filtered	Filtered	Filtered	11118	5599.63	20561.3	Filtered	Filtered	Filtered	Filtered	Filtered	9283.91	Filtered
O75368	SH3 domain-binding glutamic acid-rich-like protein	31609.6	45187.4	29127.4	56167.9	40528	29082.1	93076.8	28485.1	28250.1	43831.8	34337.2	29970.4	44624.6	34250.9	43912.2	67342.2	32967.8	28283.6	25516	22099	32472.9	35837	38117.1	38087.9	24862.2	Filtered	40090.6	31104.4	48038	56818.9	37460.2	54827.2
O75369	Filamin-B	10695.5	11861	6870.74	6323.4	5536.68	5404.93	4726.49	5142.61	7624.86	7819.54	7260.61	4675.88	3987.3	4801.92	6828.66	Filtered	8658.14	8217.72	15176.1	19605.1	14331.4	18366.3	7034.67	8886.99	26936.1	11904.8	7479.81	20610.5	4244.33	9159.68	2414.51	2641.61
O75390	Citrate synthase, mitochondrial	7327.01	11567.5	12921.3	4833.41	15302	7793.28	14152.8	10343.8	13181.5	15293	3835.31	5670	13501.3	18753	Filtered	Filtered	2346.27	13950.8	15251.1	Filtered	37260.1	22292.3	10455.9	23784.4	20318.2	7605.09	18813.4	Filtered	22365.4	18554.3	20351.7	14741.6
O75396	Vesicle-trafficking protein SEC22b	8898.8	1108.87	8227.69	Filtered	10791	9256.57	3086.32	Filtered	9062.88	11178.7	6881.01	7657.81	6186.68	11507.5	Filtered	Filtered	6200.78	8106.43	5651.09	Filtered	Filtered	Filtered	4236.58	9088.53	11530.5	Filtered	6663.16	Filtered	Filtered	12913.3	6067.1	4894.02
O75436	Vacuolar protein sorting-associated protein 26A	8727.17	8663.52	12944.7	10226.6	7960.06	11833.9	11878.8	17032.6	6556.58	10798.5	8970.43	10226.2	5861.23	6216.69	Filtered	Filtered	8911.32	11068.3	14793.6	Filtered	14582.9	Filtered	13569.2	8576.17	19329.7	Filtered	9785.84	Filtered	12921.2	16865.5	11918.7	10937.4
O75503	Ceroid-lipofuscinosis neuronal protein 5	1499.36	5086.1	1997.83	9923.85	3130.08	Filtered	Filtered	11745.2	4087.93	4325.43	8438.29	Filtered	Filtered	Filtered	Filtered	Filtered	Filtered	Filtered	Filtered	21495.9	Filtered	Filtered	Filtered	Filtered	Filtered	Filtered	Filtered	76677.6	Filtered	4855.48	Filtered	Filtered
O75531	Barrier-to-autointegration factor	16436.2	15707.5	6630.47	Filtered	4782.41	3886.53	9586.25	9042.95	9643.19	19781.7	Filtered	9007.09	4379.74	5133.54	15371.5	Filtered	Filtered	Filtered	10383.8	Filtered	Filtered	Filtered	7429.12	7322.91	26497	Filtered	7875.74	Filtered	4403.46	11716.5	14616.8	14749.8
O75533	Splicing factor 3B subunit 1	Filtered	Filtered	4138.77	Filtered	Filtered	Filtered	Filtered	Filtered	Filtered	1777.14	Filtered	Filtered	Filtered	895.026	Filtered	Filtered	Filtered	Filtered	4607.06	Filtered	Filtered	Filtered	Filtered	2446.69	Filtered	Filtered	Filtered	Filtered	Filtered	Filtered	Filtered	Filtered
O75534	Cold shock domain-containing protein E1	3089.81	4222.77	2761.85	7823.51	4674.05	4402.88	4648.66	Filtered	2920.1	3214.33	Filtered	3577.28	7328.14	5818.98	Filtered	Filtered	Filtered	6722.36	122.36	Filtered	Filtered	Filtered	Filtered	3796.27	Filtered	Filtered	Filtered	Filtered	4093.07	5762.14	Filtered	7250.68
O75556	Mammaglobin-B	11929693	17449190	6330296	65985840	8.31231e+06	6427736	22259156	21645266	13859895	18566300	35902340	9450241	6203750	3.12677e+06	5.42718e+06	5.85104e+06	43816048	26411630	24511836	101524872	60760196	101793608	4783559	2220714	41407272	310323936	147036368	562948288	35369044	8.22393e+06	16481548	28435314
O75569	Interferon-inducible double stranded RNA-dependent protein kinase activator A	Filtered	1022.08	369.19	Filtered	Filtered	Filtered	Filtered	Filtered	286.85	907.06	Filtered	1234.42	1012.41	624.424	Filtered	Filtered	Filtered	Filtered	414.691	2157.02	Filtered	Filtered	Filtered	958.703	2407.41	Filtered	Filtered	Filtered	Filtered	1366.44	Filtered	Filtered
O75608	Acyl-protein thioesterase 1	22996.4	28155.9	27036.1	40572	25342.2	31382.7	32190.8	38379.7	31955.7	33063.9	30666.4	36340.8	28587.6	26745.3	50454.4	51841.1	29645.2	36550.3	31752.8	Filtered	34246.2	Filtered	30540.8	24276.7	Filtered	Filtered	50096.7	Filtered	17416.4	30188.1	34993.9	51627.7
O75663	TIP41-like protein	Filtered	786.456	2426.34	4495.8	1877.39	2713.91	637.579	Filtered	1470.55	Filtered	3692.3	2231.06	1599.44	1340.67	5823.27	1989.57	2131.73	3976.06	2804.48	Filtered	Filtered	Filtered	2033.78	1580.47	Filtered	Filtered	Filtered	Filtered	Filtered	3099.37	Filtered	2007.28
O75688	Protein phosphatase 1B	3758.92	Filtered	13465.2	7606.77	5346.7	1007.69	Filtered	Filtered	Filtered	4180.05	Filtered	6943.73	Filtered	Filtered	Filtered	Filtered	Filtered	Filtered	Filtered	Filtered	Filtered	Filtered	963.677	2678.25	Filtered	Filtered	Filtered	Filtered	Filtered	Filtered	Filtered	Filtered
O75787	Renin receptor	1581.18	5056.88	884.621	11185.8	Filtered	4461.37	6520.36	7371.42	1523.35	2467.04	4796.42	3224.97	Filtered	Filtered	14516	3617.72	3148.35	4870.93	Filtered	10755.6	5665.65	10024.2	Filtered	Filtered	6560.96	39148.6	14604.6	73835.2	8289.09	7281.66	4312.37	8692.85
O75821	Eukaryotic translation initiation factor 3 subunit G	1831.19	Filtered	1322.73	1976.33	2142.58	20616.5	7891.6	25363.4	2754.22	Filtered	2774.26	2471.88	1887.15	1453.86	Filtered	2760.31	1691.67	3451.34	1021.54	17269.2	3703.72	35216.1	1046.94	Filtered	3681.58	Filtered	4483.12	Filtered	Filtered	3582.6	1323.92	2865.96
O75822	Eukaryotic translation initiation factor 3 subunit J	Filtered	1096.08	4298.22	11314.7	20420.1	Filtered	Filtered	Filtered	9657.73	5673.41	Filtered	7270.75	9094.97	5431.79	Filtered	7739.12	4474.67	6514.56	6942.77	6158	Filtered	Filtered	6942.3	9789.24	Filtered	Filtered	5657.59	Filtered	Filtered	9530.05	8464.4	10395.3
O75828	Carbonyl reductase [NADPH] 3	121067	98803.2	43767.3	78727.1	93672.7	90103.1	155084	180696	121412	159136	119023	91267.8	100642	76658.7	166548	192163	130340	103883	86599.9	162768	126439	135213	119281	162522	51217.9	85885.8	186545	245066	111395	101419	88705.9	138526
O75832	26S proteasome non-ATPase regulatory subunit 10	Filtered	7879.21	3210.31	9497.72	Filtered	Filtered	Filtered	Filtered	2674.46	Filtered	Filtered	4711.37	Filtered	Filtered	Filtered	Filtered	6881.87	3143.78	7957.28	Filtered	10777.9	Filtered	Filtered	Filtered	Filtered	Filtered	Filtered	Filtered	Filtered	4555.67	Filtered	11279.7
O75843	AP-1 complex subunit gamma-like 2	1562.73	2707.34	1925.04	1980.84	1904.51	Filtered	Filtered	Filtered	934.856	3532.52	Filtered	2803.91	5028.37	2467.23	6144.22	Filtered	4465.66	5822.68	3499.18	Filtered	7563.64	Filtered	2409.34	2643.62	2161.6	Filtered	7233.06	Filtered	12026.3	6169.45	2216.26	2395.88
O75874	Isocitrate dehydrogenase [NADP] cytoplasmic	114796	181101	136778	181893	138707	135442	287970	232711	140930	133982	138615	231460	143303	134939	175732	163785	182830	258826	275121	228983	226486	205867	152046	134555	106254	85869.2	158985	172627	234404	170778	271544	239287
O75882	Attractin	5881.99	4120.94	1965.77	7153.04	6691.99	8573.01	7110.5	8808.43	4616.33	4386.89	7519.34	4583.85	4908.8	2488.81	12309.3	11533.5	7212.02	4000.43	4761.89	21183.2	8792.25	21537.8	4864.71	5919.37	14162.2	40744.7	6452.65	104241	12432.7	7936.82	4726.32	4690.93
O75884	Putative hydrolase RBBP9	5313.76	13861.2	3111.11	8181.53	5330.13	3697.44	Filtered	Filtered	27364.9	8404.4	5458.08	18132.3	13510.3	21385.5	35650.1	Filtered	Filtered	225893	8223.35	Filtered	Filtered	Filtered	7728.34	2540.09	Filtered	Filtered	9424.99	Filtered	26362.8	19527.5	4600.13	5157.68
O75888	Tumor necrosis factor ligand superfamily member 13	Filtered	3927.87	423.861	2377.3	3815.05	2739.89	6710.22	6483.26	2348.18	4369.06	5760.33	4616.13	Filtered	2692.22	16341.7	12260.2	2901.37	Filtered	5469.88	11071.9	5621.72	21483.3	1752.18	3885.02	7751.18	Filtered	3868.44	69259.3	Filtered	Filtered	Filtered	Filtered
O75891	Cytosolic 10-formyltetrahydrofolate dehydrogenase	44192.6	128346	65761.4	85961.1	84422	96046.7	67243.4	82964.6	74796.2	76946.6	179834	157342	109321	79621.8	262772	287304	141879	115158	137284	184845	144358	122718	111531	79792.1	72379.1	33446.7	110852	142160	96167.5	73247.6	78497	137159
O75935	Dynactin subunit 3	8165.46	11101.5	9740.23	4878.59	7864.41	9436.59	3264.01	Filtered	6888.96	7150.59	10331.3	7454.8	5974.84	6870.58	Filtered	Filtered	Filtered	4493.07	3603.07	Filtered	Filtered	Filtered	Filtered	2880.38	Filtered	Filtered	Filtered	Filtered	Filtered	8705.11	4864.39	5603.85
O75936	Gamma-butyrobetaine dioxygenase	7427.26	10535.4	4635.04	11697.4	12340	10873.3	12620.2	18505.7	9690.73	13793.3	9126.21	14110.4	7672.78	5739.94	24531.1	23113.9	4317.12	4372.2	13443.8	11596.9	7813.17	12764.9	2201.13	3167.75	7055.25	Filtered	10037.6	Filtered	21816.1	5695.76	3478.22	8907.23
O75976	Carboxypeptidase D	780305	1.8323e+06	25608	12274.9	687328	3000.93	2.31403e+06	Filtered	745.887	Filtered	Filtered	236278	1366.73	1034.17	10966.6	10320.1	27341.1	Filtered	Filtered	21362.6	7396.15	27028.2	Filtered	1260.84	Filtered	51184.7	294245	109679	4899.06	5423.33	2406.93	Filtered
O76003	Glutaredoxin-3	7091.47	37757.8	24549	20062.2	7028.35	10233.2	35036.9	10815.8	20169.8	23778.5	9967.13	16785.8	10672.6	14642.7	Filtered	142155	12898.1	16690.8	6762.62	76013.1	66817.9	342534	13540.6	14731.7	55521.8	462923	90686.6	243389	Filtered	24505.8	9873.59	16482.1
O94760	N(G),N(G)-dimethylarginine dimethylaminohydrolase 1	8908.89	13411.1	3025.24	Filtered	7046.49	7450.94	10013.1	6631.75	7559.66	7895.51	5303.6	6241.23	3964.22	755.545	13852.8	Filtered	7598.5	4046.38	3780.33	Filtered	Filtered	Filtered	Filtered	6020.42	6868.93	Filtered	9733.7	Filtered	4430.95	5158.17	6154.16	5548.9
O94832	Unconventional myosin-Id	3420.03	Filtered	1154.32	2281.7	525.736	1043.24	Filtered	Filtered	1750.49	479.537	Filtered	Filtered	Filtered	Filtered	Filtered	Filtered	Filtered	Filtered	1595.01	Filtered	Filtered	Filtered	Filtered	Filtered	Filtered	Filtered	43968.2	Filtered	Filtered	1200.12	Filtered	Filtered
O94973	AP-2 complex subunit alpha-2	3775.52	3603.29	5981.43	4659.44	5082.17	4675.29	7302.75	4899.01	3833.77	6649.38	3317.2	11940.1	5016.98	3790.75	Filtered	6702.16	4700.21	7458	7741.71	9982.34	8178.75	8763.58	6463.31	4846.29	7044.48	Filtered	7269.14	Filtered	11345.3	10462	5807.22	3435.89
O94979	Protein transport protein Sec31A	14027.7	14361.2	16824.4	17346.9	13602	12674	14978.8	16625.4	16762.2	12968.7	16390.2	16476.4	16362.2	12742.8	10279.1	16651.5	20521.3	18691.3	16188.3	35743	14505.3	Filtered	11708.7	10720.9	10925.5	Filtered	12136.9	15214.1	16395	24381.9	9419.9	11517.4
O95049	Tight junction protein ZO-3	3849.83	2929.71	2019.72	Filtered	1071.6	1388.58	33182.1	Filtered	786.357	Filtered	Filtered	1573.26	2812.5	606.521	Filtered	Filtered	Filtered	Filtered	2457.56	Filtered	Filtered	Filtered	Filtered	Filtered	3823.97	Filtered	Filtered	Filtered	Filtered	Filtered	Filtered	3691.12
O95084	Serine protease 23	Filtered	2888.3	Filtered	Filtered	Filtered	Filtered	8726.5	Filtered	Filtered	Filtered	3349.05	Filtered	4506.8	Filtered	Filtered	Filtered	Filtered	Filtered	1465.19	11222	Filtered	Filtered	Filtered	Filtered	Filtered	Filtered	Filtered	47136.4	Filtered	Filtered	Filtered	Filtered
O95171	Sciellin	3173.21	2069.44	18932.1	10096.4	3787.86	5417.7	6082.42	5053.87	10188.2	6599.27	4836.21	8372.93	2779.31	5008.49	9185.98	Filtered	6007.51	13443.3	19605.5	Filtered	13227.6	16257.5	8186.67	2459.93	22007.6	Filtered	Filtered	Filtered	13427.3	14611.6	10281.3	8534.46
O95295	SNARE-associated protein Snapin	865.597	1160.1	1462.9	1615.54	796.049	Filtered	Filtered	Filtered	1566.34	2134.8	Filtered	Filtered	1569.86	1444.58	Filtered	Filtered	Filtered	1345.52	Filtered	Filtered	Filtered	Filtered	Filtered	Filtered	1026.78	Filtered	Filtered	Filtered	Filtered	1945.49	Filtered	938.455
O95336	6-phosphogluconolactonase	79124.7	79439.9	53337.2	88382.7	84315.7	76050.1	135614	141765	59414.2	94387.2	106636	117109	82882.3	62889.1	128890	141592	81955.8	58360.4	95119.8	100526	79110.9	100594	60719.1	51416.8	39695.2	57734.5	74490.6	160934	71353.7	53050.7	77748.6	126316
O95352	Ubiquitin-like modifier-activating enzyme ATG7	4231.6	3165.26	2343.51	6657.21	2528.79	2732.37	7133.15	5688.77	2999.11	4909.77	4371.51	4797.47	1585.45	2446.99	6348.12	Filtered	2538.35	3405.14	1938.9	Filtered	5332.9	Filtered	2243.37	1809.89	3058.71	Filtered	7659.72	Filtered	Filtered	2550.54	28870.9	3719.85
O95359	Transforming acidic coiled-coil-containing protein 2	2131.21	3268.02	3401.65	3195.46	Filtered	6447.42	Filtered	Filtered	4954.35	5190.67	5647.04	3363.64	Filtered	3075.5	Filtered	Filtered	6930.18	4279.97	3140.59	9459.24	Filtered	Filtered	4173.06	Filtered	Filtered	Filtered	Filtered	Filtered	5082.49	3982.61	Filtered	2867.38
O95361	Tripartite motif-containing protein 16	6335.89	7518.83	2807.11	5703.91	9666.17	8696.79	9139.53	9787.87	7084.44	6278.69	10308.9	10678.2	12246.5	13789.2	16564.8	17724.6	14611.9	13257.5	10529	15289.8	19379.5	Filtered	18375.6	13519.1	2674.79	Filtered	Filtered	Filtered	17853.9	19915	8838.2	15779
O95372	Acyl-protein thioesterase 2	11181.2	9405.22	7370.5	31617.6	6524.6	6389.53	13783.3	16911.9	8859.75	10314	12293	6856.07	15618.6	6805.52	16942.5	4950.67	12642.1	12810	13884.2	4562.89	16981.1	31651.2	11327.4	5658.2	6684.86	Filtered	10960.5	18661.8	Filtered	20469.1	10801.7	16119.4
O95373	Importin-7	3569.01	3314.32	2852.43	3345.81	2227.55	2469.27	829.002	Filtered	1794.15	4029.13	2878.46	5096.19	1265.65	6811.54	4021.39	3843.72	2313.11	3606.63	1511.73	Filtered	15750.1	6780.72	3562.22	2766.21	1628.8	Filtered	3053.23	9544.72	3954.82	1918.51	1328.56	2618.38
O95394	Phosphoacetylglucosamine mutase	3524.65	3512.56	3015.49	Filtered	14386.4	7761.62	13349.9	Filtered	8393.94	6502.9	13146.8	5990.42	5282.62	5014.88	6652.33	14327.3	5448.6	7455.43	4078.82	7842.38	11141.6	Filtered	5356.58	5784.46	Filtered	Filtered	7142.56	Filtered	13273	7476.7	4888.29	6193.24
O95395	Beta-1,3-galactosyl-O-glycosyl-glycoprotein beta-1,6-N-acetylglucosaminyltransferase 3	7097.65	1615.23	469.378	12767.4	5857.92	8505.27	Filtered	Filtered	Filtered	1313.06	4093.35	1059.36	Filtered	Filtered	12002.1	14249	5455.78	Filtered	Filtered	4075.36	6002.81	Filtered	1422.62	2474.21	8841.41	34350.9	4705.59	17446.2	7583.03	7353.1	Filtered	6701.12
O95433	Activator of 90 kDa heat shock protein ATPase homolog 1	17694.8	8390.57	3543.24	15896.8	11220.2	7240.16	15209.6	23236.1	8929.54	14745.8	15450	8475.56	12615.3	4520.72	10897.7	13479.9	7742.71	8603.42	9379.65	17092.3	10559.6	Filtered	4761.02	7654.74	5704.71	Filtered	12276.5	Filtered	9146.61	9293.86	9982.31	23158.6
O95436	Sodium-dependent phosphate transport protein 2B	5146.02	10429.6	7686.28	20144.8	6754.79	10816.6	9047.9	Filtered	5111.41	2456.28	6497.87	11437.6	5748.09	2773.2	Filtered	Filtered	6972.46	8628.44	9046.55	Filtered	11725.2	Filtered	7113.22	5178.12	11878.8	Filtered	3612.79	Filtered	13033.6	18535.1	3256.22	7586.25
O95445	Apolipoprotein M	14051.6	6018.6	Filtered	Filtered	Filtered	9398.91	Filtered	2244.25	14405.9	7588.24	Filtered	Filtered	911.098	4424.38	Filtered	8685.86	Filtered	Filtered	Filtered	Filtered	Filtered	Filtered	7163.62	3281.56	10208.9	Filtered	6369.89	Filtered	2850.96	Filtered	5624.58	Filtered
O95479	GDH/6PGL endoplasmic bifunctional protein	5028.32	3087.14	3037.54	1522.05	4549.92	4388.21	8736.25	7042.25	2820.02	2766.41	835.151	2192.61	7657.64	7625.94	6573.77	Filtered	6500.86	2663.23	1743.16	Filtered	Filtered	Filtered	1651	4722.01	4245.55	Filtered	1847.08	Filtered	12411.1	8374.11	7678.98	3524.84
O95571	Protein ETHE1, mitochondrial	14230.3	28331.5	16171	23216.4	30110.8	14439.1	35313.3	38814.8	14096.2	21506.3	21067	20805.8	18381.6	18873	Filtered	Filtered	20098.6	32749.2	16047.6	Filtered	3507.46	Filtered	27251.7	25063.9	23115.6	Filtered	24954.6	Filtered	45509.9	38877.4	19904.7	12417.5
O95671	N-acetylserotonin O-methyltransferase-like protein	2587.63	3605.18	1441.77	1894.24	2253.55	2010.24	1004.01	1367.92	3591.33	3586.22	3886.85	Filtered	1119.97	1286.65	5938.43	4899.54	2596.46	1323.98	1889.03	Filtered	609.538	Filtered	1111.89	1523.46	2465.41	Filtered	3663.55	732.81	1126.81	1326.53	720.278	807.592
O95716;P20336	Ras-related protein Rab-3D;Ras-related protein Rab-3A	7620.8	13822	3511.44	17809.7	9831.46	4094.24	Filtered	4683.2	7943.38	18945.1	19723.6	9565.79	3912.46	77971.4	14447.3	473177	15452.6	28256	Filtered	Filtered	Filtered	Filtered	483926	389581	24562.9	Filtered	419723	398100	7305.71	19170.5	79247.9	20566.4
O95747	Serine/threonine-protein kinase OSR1	5506.91	7390.98	7139.21	17790.4	7885.95	7457.05	12131.1	10209.6	5813.15	7056.84	10579	8830.43	8846.66	7250.07	17012.4	10790.3	9755.32	7884.96	7350.36	17821.6	13285	10675.4	5753.89	4545.62	7087.96	Filtered	11678	13083.2	13209	9356.8	7107.93	8647.47
O95777	N-alpha-acetyltransferase 38, NatC auxiliary subunit	5822.27	5012.53	2684.92	Filtered	1594.21	1425.03	Filtered	Filtered	827.549	1575.4	Filtered	2058.84	2281.32	2397.67	Filtered	Filtered	Filtered	2885	4232.19	Filtered	Filtered	Filtered	4476.41	5028.45	7821.79	Filtered	3270.38	Filtered	Filtered	Filtered	2503.23	Filtered
O95782	AP-2 complex subunit alpha-1	6735	9615.75	8881.29	7930.42	6302.38	7959.71	9444.36	12616.8	7526.53	10759.3	8748.75	9335.87	7629.65	7798.01	14827.3	Filtered	9204.09	10323.2	7407.67	13213.5	3502.73	11406.2	6478.81	6384.17	10622	Filtered	5768.95	Filtered	9568.65	12055.1	5575.95	8340.98
O95786	Probable ATP-dependent RNA helicase DDX58	3527.99	Filtered	2314.09	Filtered	Filtered	4802.35	Filtered	Filtered	Filtered	Filtered	Filtered	16053	7716.69	8562.59	Filtered	Filtered	Filtered	Filtered	8141.55	Filtered	Filtered	Filtered	6063.52	10192	Filtered	Filtered	Filtered	Filtered	Filtered	Filtered	2081.49	Filtered
O95793	Double-stranded RNA-binding protein Staufen homolog 1	2049.34	3036.65	1037.46	4866.32	2271.33	2198.16	6186.39	6700.45	3521.17	4124.34	6850.05	3047.23	1069.91	1816.66	2840.37	6131.14	4269.01	4811.16	6491.3	24934	6296.46	11152.2	3818.06	3136.12	14142.4	48090.5	14163.6	69328.2	4471.78	4493.27	2058.9	5058.14
O95817	BAG family molecular chaperone regulator 3	Filtered	Filtered	3811.09	Filtered	Filtered	Filtered	11697.5	Filtered	Filtered	4989.12	Filtered	3387.62	5502.65	Filtered	Filtered	Filtered	12589.3	18482.6	9570.34	Filtered	Filtered	Filtered	6969.24	5022.68	Filtered	Filtered	Filtered	Filtered	5172.11	10087.2	3774.8	Filtered
O95831	Apoptosis-inducing factor 1, mitochondrial	671.749	Filtered	2125.52	Filtered	590.897	Filtered	Filtered	3341	835.275	2088.5	Filtered	Filtered	2320.8	3687.72	Filtered	Filtered	1517.01	4165	954.021	Filtered	Filtered	Filtered	Filtered	Filtered	1778.03	Filtered	2137.5	Filtered	3985.85	2904.04	6884.68	Filtered
O95833	Chloride intracellular channel protein 3	290.35	10554.9	4998.92	15541	1802.21	Filtered	10561.3	22395.1	5955.68	912.578	Filtered	5259.79	1253.72	5555.5	Filtered	Filtered	12669.2	14481.4	8505.96	Filtered	Filtered	Filtered	10621.5	10033.8	Filtered	Filtered	Filtered	Filtered	29962.6	Filtered	9839.72	Filtered
O95834	Echinoderm microtubule-associated protein-like 2	34083.4	38923.2	30557.6	45987.6	47749.2	48976.2	61419.6	64257.5	43551.1	48093.7	57778.3	51249.4	42507.8	44233.3	61373.7	57522.7	38244.6	41790.6	46174.5	46638.6	51860.9	65923.4	41042.3	33540.2	44392.5	Filtered	34801.7	49752.8	41639.2	29220.3	39938.3	46401.9
O95841	Angiopoietin-related protein 1	1956.94	5701.2	200.526	Filtered	2292.27	3402.44	Filtered	8367.08	1696.96	5037.09	2905.51	4360.56	1632.68	363.473	13224.9	16567.1	655.851	1935.07	967.993	4581.77	7271.72	21633.9	1041.62	4043.45	5383.07	92801.1	6781.43	87788.9	9729.15	6817.03	1746.22	7131.05
O95861	3'(2'),5'-bisphosphate nucleotidase 1	6691.75	9104.05	8242.81	17245.2	25650.2	16991	11140	14685.5	10039.7	8611.69	12784.4	25220.4	9635.61	11328	6961.91	10947.9	6150.03	7561.46	11928.7	Filtered	17230.6	133270	7140.16	2773.93	36709.2	Filtered	19318.8	215394	8887.25	8415.98	7125.91	7608.59
O95865	N(G),N(G)-dimethylarginine dimethylaminohydrolase 2	12502.2	14688.3	8460.29	15752.2	10025.8	15342.6	12692.8	14276.8	11173.1	15790.2	16027.4	15919.2	12514.4	10538.7	28053.6	22158.9	13196.7	8517.28	12105.3	25229.4	10799.8	26068.5	13040	6643.29	18769.2	Filtered	17648.9	Filtered	17038.3	12675.8	13951.2	12922.8
O95965	Integrin beta-like protein 1	Filtered	Filtered	Filtered	1849.55	Filtered	Filtered	Filtered	Filtered	Filtered	Filtered	26755.6	Filtered	Filtered	Filtered	Filtered	Filtered	Filtered	Filtered	Filtered	Filtered	Filtered	Filtered	Filtered	Filtered	Filtered	Filtered	Filtered	Filtered	Filtered	Filtered	Filtered	Filtered
O95968	Secretoglobin family 1D member 1	3.83843e+06	4735077	2.97378e+06	21262082	3.61149e+06	3489209	8747175	9450997	6178858	4641319	12652010	3.98669e+06	2.80992e+06	1.45617e+06	1.52086e+06	3.3404e+06	13236834	7247044	8954031	29173506	19949896	30613460	1.90641e+06	1.13093e+06	16640133	67322568	44099252	170397616	9948092	3.0127e+06	6818256	9978580
O95994	Anterior gradient protein 2 homolog	216967	195600	125190	70559.4	170514	89288.3	242750	173865	305012	299002	196101	258596	298029	254990	180149	150310	492266	382749	244259	326226	316109	200413	192118	202610	388118	482734	518526	516783	441705	249030	454072	312359
P00326	Alcohol dehydrogenase 1C	263521	232366	126961	168833	242754	227684	759943	1.02302e+06	242175	527041	314606	112668	391062	245338	385732	486608	387078	197731	197974	482029	237439	324531	42775.9	43851.8	298541	234518	109082	189460	381363	301528	230459	486264
P00338	L-lactate dehydrogenase A chain	646992	873848	406321	469132	686836	552720	967044	935927	716340	904283	1.04797e+06	968691	596156	497939	1.07776e+06	1.04006e+06	1.03004e+06	1254258	1.15669e+06	1.05473e+06	755161	826593	530131	527639	586674	507759	752462	1.12085e+06	765748	856086	555643	746061
P00352	Retinal dehydrogenase 1	766266	1.15852e+06	746950	1160591	831247	891777	1.37088e+06	1.123e+06	973046	786076	1.29098e+06	1.13152e+06	637925	669822	1.59651e+06	1.80796e+06	938528	1.03334e+06	960579	1.20424e+06	798677	875730	724157	582901	581044	889321	809607	1.47453e+06	839331	694727	689977	988433
P00367	Glutamate dehydrogenase 1, mitochondrial	2483.66	3907.29	7675.12	1408.25	3089.7	2193.09	11292.6	9841.85	8187.34	5124.52	3515.43	6271.91	6815.48	7953.76	969.112	Filtered	11070.5	21539.9	7975.26	19075.8	8315.32	19523.6	6989.3	8163.78	12370.1	Filtered	11969.7	Filtered	12564	15238.3	19234.3	7381.27
P00390	Glutathione reductase, mitochondrial	64389.1	66362.7	65507.2	63709.7	54810.9	58322.6	57322.7	69255.3	69070.1	81707.9	47243.5	95260.8	69495.9	72079.4	101095	82070.9	49129.2	50198.1	62960.3	92948.4	26557.3	27619.5	35672.5	32627.1	37859.4	31351.8	51268.7	51834.1	41952.1	44322.8	41438.5	72836.8
P00441	Superoxide dismutase [Cu-Zn]	85928.6	76935.2	43811.8	68693.7	52016.6	53460.3	163701	203409	52053	134724	82573.9	127131	49013.4	32211.1	180317	243649	96415.2	56018.8	62516.8	144848	77477	155892	52485.9	46838.6	92069	106178	88988.2	209017	125830	73706	65716.4	100499
P00450	Ceruloplasmin	251348	265186	146935	612674	377127	499406	410483	441519	276880	340972	576783	203700	502078	387168	1.05635e+06	1009576	535661	360067	208330	677757	487746	969517	746521	650405	715600	2426607	739333	2.50581e+06	603115	378030	361632	316384
P00488	Coagulation factor XIII A chain	Filtered	Filtered	55.9617	Filtered	Filtered	923.941	Filtered	Filtered	Filtered	Filtered	Filtered	Filtered	1222.26	1440.78	Filtered	Filtered	Filtered	Filtered	Filtered	Filtered	Filtered	Filtered	774.904	132.293	1561.85	Filtered	Filtered	Filtered	Filtered	Filtered	Filtered	Filtered
P00491	Purine nucleoside phosphorylase	7379.72	5485.53	10152.9	21479.7	9922.17	8535.75	11300.5	15868.9	7164.4	6234.75	10788.1	4994.66	14098.6	12411.4	7656.38	8272.02	18321.4	27802.5	11274.3	14529.6	10133.1	11776.9	11791.7	10664.6	6755.02	Filtered	10289.7	13178.6	12843.9	12116	15296.6	15479.5
P00492	Hypoxanthine-guanine phosphoribosyltransferase	7250.44	8493.85	5831.66	6471.1	10762.5	5452.11	8896.47	13188.6	4096.26	7670.8	9669.96	8532.27	5887.44	6355.49	27362.9	12147.4	8253.54	11156.6	7207.07	Filtered	Filtered	Filtered	3089.04	3089.51	Filtered	Filtered	5709.34	Filtered	9251.06	4375.65	6015.78	7513.21
P00505	Aspartate aminotransferase, mitochondrial	Filtered	Filtered	2740.61	Filtered	3571.42	Filtered	4601.09	2547.88	1239.43	1288.38	Filtered	1886.04	5028.77	5701.55	Filtered	Filtered	Filtered	6313.16	10070	Filtered	8143.54	8249.2	1769.75	3965.29	5887.18	Filtered	7961.17	Filtered	7498.12	6565.99	5775.8	Filtered
P00558	Phosphoglycerate kinase 1	374415	418184	238177	451356	443557	511667	666951	561973	467549	583511	450194	448380	411618	330161	688611	710965	404574	532876	396065	606208	488616	597889	357488	273701	337437	435640	397577	555995	627141	401601	335441	473235
P00568	Adenylate kinase isoenzyme 1	9047.7	33332.3	11414.7	21250.5	11386	14064	26032.2	32920.8	12132.1	15624.5	22648.9	30470.7	10380.7	10796	32171.6	27613.2	17365.1	14718.8	13647.5	33497.3	Filtered	Filtered	1906.66	2973.43	Filtered	Filtered	16513.9	20522.8	30777.1	14625.2	3037.13	12315.8
P00734	Prothrombin	101506	65257.6	21024.4	34948.9	69184.5	94899.8	85590.3	95287	64307.8	75901.4	40909.1	25697.7	50760.9	46755	33102.6	53759.8	69046.3	37906.5	10476.4	24609.4	56000.3	104642	92864.1	71971	156035	558387	66907.2	40430.2	78468.3	36275.4	76163	43961.8
P00736	Complement C1r subcomponent	18915.7	6350.79	1799.52	1554.07	12769.2	23462.3	66586.2	60114	3877.15	7681.06	Filtered	3630.82	20909	17486.5	28475.5	28868.5	15372.1	15478.5	25577.3	39923.7	Filtered	Filtered	28247.9	22670.9	10877.7	44414	18934.8	Filtered	6796.27	Filtered	11757.4	40110.6
P00738	Haptoglobin	2759734	2.53834e+06	216746	537598	1.22896e+06	2.64272e+06	501836	553209	1748523	2100821	954964	553816	663372	658648	1.64906e+06	2.12938e+06	498003	220489	441715	2.19884e+06	880040	1.6508e+06	2841008	2.02293e+06	2.49263e+06	8805319	2.15732e+06	9820223	143174	64486.8	1296776	1.08128e+06
P00739	Haptoglobin-related protein	10192.5	4541.44	653.097	1114.91	4028.57	13344.5	Filtered	Filtered	4324.84	4708.49	Filtered	Filtered	1688.84	1379.16	Filtered	Filtered	3538.3	753.273	Filtered	Filtered	5851.79	21463.1	6680.21	6058.95	13009.2	22657.8	5006.63	Filtered	Filtered	Filtered	1560.48	Filtered
P00746	Complement factor D	15089.3	22898.3	7646.4	33545	22810.1	26465.5	28107.2	46048.7	21172.7	21167.8	27376.8	12641.1	23752.5	20876	38728.6	45613.4	20973.3	22370.6	7430.88	28700.9	12648.7	59750.6	27173.6	30646.8	20673.5	193274	50425.6	Filtered	23630.8	30864.5	13234.4	8487.48
P00747	Plasminogen	148158	93466.8	26696.1	36864.8	164641	255250	116975	123461	132828	131246	86932.4	53303.1	81884.5	98711.8	76067.4	98503.4	124554	55784	27333.6	63306.1	138138	172057	301185	213104	335403	899110	136475	93813.6	137363	55082.2	152877	83406.9
P00748	Coagulation factor XII	16179.7	5594.34	2063.16	Filtered	15584.8	24125	19197.1	Filtered	4424.67	9866.07	6237.02	4958.27	9525.02	6654.36	Filtered	Filtered	2597.07	7115.74	Filtered	Filtered	Filtered	Filtered	19466.2	16829.5	29085	42650.9	11687.9	Filtered	Filtered	Filtered	9050.59	50506
P00751	Complement factor B	94684.7	73543.9	28057.8	45456.9	129401	190680	53901.9	65183	84944	96545.1	66021.8	41750	141894	89737.8	198269	244573	110429	61527.4	10661.2	31826.2	106777	136241	147242	198505	241409	534493	152908	145459	104953	82670.5	135413	94829.3
P00966	Argininosuccinate synthase	215869	247223	124395	155378	196198	155314	141479	162976	164507	225832	242596	265974	347273	307383	328150	323877	181299	151343	95385.9	206995	176472	150695	204667	234129	115224	104318	251867	198927	166001	150172	91430.5	185033
P01008	Antithrombin-III	66544.1	53466.4	32483.8	49695	62086	68686	97543.8	95019.4	50221.8	58669.3	47164	48797.3	60667.2	65024.6	70449.4	54124.2	70168.4	55406.5	36989.9	43985.4	72512.7	117503	63116.6	55498.1	104454	309295	66048.3	34263.5	71569.8	53116.3	67498.4	49307
P01009	Alpha-1-antitrypsin	586643	519558	153605	235785	969021	1.58388e+06	721402	1.01343e+06	610001	631055	415006	379908	690837	549964	662037	1.07566e+06	578470	381017	151741	323074	1.10411e+06	2.1982e+06	1.53181e+06	1.65222e+06	1.6321e+06	6442007	1.05564e+06	1195988	458554	313707	1.47178e+06	708729
P01011	Alpha-1-antichymotrypsin	596560	438560	134699	560137	835333	1.22391e+06	642870	692347	700424	1.06386e+06	214326	328861	354780	317345	1.0236e+06	1.01577e+06	708399	377983	214838	1282801	1.24736e+06	2.83437e+06	995940	748825	1281576	8671833	677718	2.66982e+06	847977	531826	639279	516680
P01019	Angiotensinogen	35834.1	16100.8	7509.27	7746.47	17595.1	32963	28570.3	36178.6	23649.8	22750.4	10016.1	10378.9	16465.7	16789	5026.34	11405.1	40467.1	22953.6	670.107	20161.7	20573.1	41942.4	41709.8	28420.5	38643.5	273759	10529.2	Filtered	31990.7	19139.3	20846	9085.61
P01023	Alpha-2-macroglobulin	352888	111516	37921.6	32707.1	330927	886448	257444	299450	491431	421202	149063	65250.9	583078	800436	98770.3	120012	236669	43607.9	10313.8	49274.3	705444	1.29655e+06	1.2367e+06	925942	1.46346e+06	4.35682e+06	481116	729986	231107	56531.4	668862	306958
P01024	Complement C3	711269	540507	93013.7	168545	872975	1.42177e+06	661572	811036	410710	507983	466365	464967	837538	603314	1948118	1.89581e+06	871683	486623	161535	508168	840713	1.247e+06	982414	711142	1.50777e+06	3.45778e+06	798518	1.17444e+06	843922	767763	699252	506837
P01031	Complement C5	10337.9	7170.57	3324.31	10970.2	11674	20777.3	9829.34	9774.76	10853.5	8527.53	2903.34	5285.75	7551.37	6053.64	Filtered	Filtered	6955	5710.8	Filtered	Filtered	2928.89	118072	16127.1	13338	21971.4	41380.9	11745.6	Filtered	10177.1	689.107	11160.8	5508.39
P01033	Metalloproteinase inhibitor 1	29770.6	42906.1	17642.8	80935.6	82258.7	73659.7	77451	128128	23118.2	47157.4	63084.5	37696.4	52982.5	40839.6	169073	207425	93753.7	59901.5	48441.3	214131	208533	409622	38123.8	43468.8	71186.9	469748	187324	932285	91121.1	62991.7	15693.5	28712.1
P01034	Cystatin-C	147217	268341	68894.4	460554	160553	159306	416813	515987	161329	260800	314658	146584	154463	104654	685929	844362	360020	264630	279197	1.48806e+06	953610	1.7995e+06	162733	158931	333689	2.34734e+06	369236	2.89726e+06	394157	250416	144746	226079
P01036	Cystatin-S	2.62968e+06	4.15716e+06	2.56844e+06	26246162	7.9876e+06	6440894	13753535	13668313	2.89356e+06	5.2365e+06	14031709	5738447	6.25788e+06	2.94396e+06	26153184	25129856	10049424	7995828	14110853	68271120	14316498	33084048	2.87784e+06	2759522	15654484	123670568	17277604	113600832	16624325	6.23646e+06	2.94497e+06	9160080
P01037	Cystatin-SN	98300.5	121267	44430.3	630374	849812	764647	394184	416308	181230	240624	195496	496043	593282	270090	3.48807e+06	2917517	2207341	1267681	803538	3.13683e+06	1.42941e+06	3899041	277057	133721	689919	8046459	1.13484e+06	5731733	261771	279589	117913	351214
P01042	Kininogen-1	236364	142130	49537.8	83836.7	147894	268985	234345	220527	168292	170838	101492	58492.2	125052	150025	114811	186090	233314	124719	47777.8	104060	226324	386652	525908	388054	569305	1.51047e+06	226670	180681	228277	100457	236718	100602
P01591	Immunoglobulin J chain	3.65861e+06	6.61899e+06	3.90014e+06	17501510	8983564	6.83087e+06	13274898	14229992	3.44965e+06	5.02476e+06	4996885	5.49209e+06	12727906	5.17976e+06	41891756	36902492	16216917	11292533	8775758	33358386	42745632	71947392	10494245	10999730	6213780	23846576	20892100	50319100	28191282	17638776	5416170	9030260
P01594	Ig kappa chain V-I region AU	318072	1.0255e+06	260824	2457642	1.32588e+06	1.06545e+06	1.63626e+06	1.55932e+06	715050	378252	745768	551732	815934	867840	3.74073e+06	3.32486e+06	1.56279e+06	921067	914767	1.84637e+06	4.60119e+06	6713259	1.44227e+06	1.35778e+06	1.31125e+06	4442446	2.01204e+06	5997752	2.44227e+06	1.20353e+06	595918	783312
P01598	Ig kappa chain V-I region EU	146479	216628	153176	721351	408346	345654	459147	516705	220530	292315	183024	211817	523684	275080	859068	835692	264968	295488	217579	1.0101e+06	1.16192e+06	1.96067e+06	497020	455711	313953	951497	648411	1.38962e+06	685287	354645	172392	188210
P01603	Ig kappa chain V-I region Ka	Filtered	Filtered	2792.83	21758.1	Filtered	2307.03	Filtered	Filtered	23088.6	24072	Filtered	1154.47	4948.95	4588.3	16251.5	6935.11	Filtered	Filtered	9522.72	54236.1	Filtered	15231.6	4588.93	6051.17	Filtered	Filtered	207262	368271	Filtered	Filtered	3462.73	4065.92
P01605	Ig kappa chain V-I region Lay	220940	257315	319739	1187484	547814	852934	275543	516949	184336	247738	303003	183278	762785	478869	1.37211e+06	1708574	339271	211525	213487	829333	1.89766e+06	2.38086e+06	689290	799642	574861	1.43159e+06	808660	2.09108e+06	1017241	702495	374741	189425
P01608	Ig kappa chain V-I region Roy	11716.4	28244.6	25715.2	74399.9	17433.7	16236.4	61113.5	70437.9	7119.95	15732.9	30179.9	12979.6	34654.7	23553.4	90092.3	102961	71524.8	45231.2	13812.5	Filtered	206357	270524	35715.7	47665.8	57525.3	Filtered	90496.2	Filtered	111328	71335	35649.4	83089.7
P01609	Ig kappa chain V-I region Scw	12051.7	26661.4	9395.22	41486.8	43533.3	28942	60126.3	68869.6	33974.9	50704.3	23186.3	21550.9	78261.8	56075.9	90824.3	139273	90783.7	48326.6	38649.1	190807	331125	481273	73961.6	63815.4	34795.6	144997	149163	544218	86108.3	59580.5	25294.1	28063.1
P01610	Ig kappa chain V-I region WEA	21780.9	38915.6	11567	62185.6	39869.5	2382.99	Filtered	Filtered	8681.9	14987.5	Filtered	35145.6	105266	4489.97	92295	Filtered	25781.6	31708.4	28706.6	Filtered	152227	286327	40312.8	96743.2	3637.81	Filtered	50276	Filtered	35783	32603.3	3350.14	Filtered
P01611	Ig kappa chain V-I region Wes	47552.5	39553.6	27036.1	220196	151495	76759.9	93102.4	128126	90150.5	48982.9	109560	51058.7	102433	58494.2	271189	373993	89324.1	71489.9	117423	550480	352975	535540	121190	123074	82875.8	583333	183999	418371	174745	169474	48012	108355
P01612	Ig kappa chain V-I region Mev	19287	29418.4	5819.16	70160.3	20407.4	25733.7	81189.3	111976	22743.1	34352.3	18884.9	17607.7	82876.1	18171.8	116554	262613	71202	40291.9	29193.9	123348	192939	772362	54590.9	26594.5	65825.4	193741	115794	311590	227354	76953.4	28355.8	35361.3
P01613	Ig kappa chain V-I region Ni	211362	57146.3	25088.8	1.33827e+06	106489	92835.6	111921	809726	51024.2	57905	293169	228435	111203	52038.8	341609	374636	115578	64038.3	55598	395837	361112	752715	66536	80013.1	124117	544875	126168	629222	261888	157149	33159	47213.8
P01614	Ig kappa chain V-II region Cum	Filtered	Filtered	Filtered	Filtered	15052.5	11596.1	Filtered	Filtered	Filtered	3658.31	Filtered	Filtered	1424.11	Filtered	Filtered	Filtered	Filtered	Filtered	Filtered	Filtered	Filtered	Filtered	Filtered	Filtered	Filtered	Filtered	Filtered	Filtered	Filtered	Filtered	Filtered	Filtered
P01615	Ig kappa chain V-II region FR	10393.5	16184.4	5410.98	28611.1	20339	15704	19396.6	17119.8	Filtered	Filtered	17553	7589.07	25903.8	12939.7	20776.8	Filtered	23576	13818.8	2043.77	Filtered	57298.1	146609	19268	21191.2	7308.83	114241	61178.6	200954	63052	51992.8	3659.46	2880.51
P01616	Ig kappa chain V-II region MIL	37003.7	41545	27759.6	89693.3	34893.6	43947.8	335354	204463	20801.8	28029.7	18581.8	20585	47949.1	42554.9	111989	126191	49718.3	31439.7	14477.9	117859	153936	2.67236e+06	30026.5	32864.9	31826.4	1.48697e+06	110760	256246	61522.7	50117.5	40607.7	40640.4
P01617	Ig kappa chain V-II region TEW	627219	969481	324437	1.18271e+06	1.23935e+06	1.04172e+06	1.82572e+06	2.22083e+06	366729	599981	570402	634270	1.31222e+06	738438	2.06133e+06	1.90386e+06	1.00023e+06	514437	446185	1.78172e+06	3.9713e+06	5971775	1.85406e+06	1728293	950785	4814433	1.78073e+06	3.35808e+06	2.8741e+06	1.39428e+06	471458	445256
P01619	Ig kappa chain V-III region B6	1696.73	4850.82	4485.8	25228.2	19010.3	5543.29	55742.5	75407.7	Filtered	989.232	Filtered	1077.72	2355.38	3384.78	Filtered	Filtered	Filtered	Filtered	Filtered	Filtered	24570.6	47543.6	7953.61	11123.5	2658.41	Filtered	3129.64	Filtered	7688.04	Filtered	1117.92	Filtered
P01620	Ig kappa chain V-III region SIE	412618	624173	327644	1.77058e+06	1.09187e+06	1.14947e+06	1.12855e+06	2.28741e+06	399694	341797	547493	404662	1.18671e+06	624898	3.74525e+06	2.43548e+06	780856	475938	454955	1.49426e+06	2.9899e+06	6.29086e+06	1300564	1.25058e+06	791001	3.2785e+06	1.718e+06	3.84753e+06	1.88605e+06	898800	490779	541489
P01621	Ig kappa chain V-III region NG9 (Fragment)	16516.7	35078.2	14793.8	66779.2	33993.4	32397.2	40079	49216.8	18066.4	12596.3	33344.9	12847.2	83664.3	17242.5	86987.6	228941	60350.8	32267.5	7132.34	1.68219e+06	66107	6.44063e+06	20438.3	29433.6	17263.2	2.80899e+06	59955.3	5995660	97954.8	23647.4	225871	29269.9
P01622	Ig kappa chain V-III region Ti	16028.2	24981.3	20406.6	95168.6	49936.1	60965	26819.3	28546.4	28834.8	34783.5	22027.5	17195	14334.5	9119.88	73367.3	Filtered	13829.5	24461.8	Filtered	Filtered	43468.3	338424	56255.1	37366.8	Filtered	65017.5	354866	678208	91200.9	127188	18212.9	Filtered
P01624	Ig kappa chain V-III region POM	2063.41	1720.77	13313.5	50239.1	59202.6	29519.2	5499.59	Filtered	17134.4	42825	14128.8	8240.74	67059.5	48572.8	24462.8	14271.4	21976.4	7916.16	24047.3	100947	34122.7	33325.6	35199.6	35569.3	Filtered	Filtered	57439.2	48118.6	33180.4	33515.2	13423.7	3083.22
P01625	Ig kappa chain V-IV region Len	48505.8	100236	49242.7	220841	198847	192851	138103	126146	72127.6	66027.8	94163.9	61638.7	143083	112169	473125	486864	145549	99757.6	87757.3	203926	483591	834992	307474	339008	151204	500970	227447	517040	271923	118307	54038.3	87896.3
P01700;P04208	Ig lambda chain V-I region HA;Ig lambda chain V-I region WAH	411272	527351	401666	1.92436e+06	739603	957363	1.4143e+06	1.36616e+06	773752	754882	1019002	530628	1.28073e+06	780430	4.83561e+06	5.62426e+06	2000766	1.58831e+06	828491	3.26011e+06	5963798	9919161	1.60001e+06	1398458	1.75674e+06	6.45424e+06	1.99138e+06	5253991	2.90298e+06	1.65455e+06	1.42277e+06	1.97714e+06
P01701	Ig lambda chain V-I region NEW	13885	16409.5	8061.14	64063.3	22706.7	18199.8	71488.9	58584.9	28040.9	43446.9	64812.4	21509.3	37026.5	19129.2	218438	185562	72507.6	64348.9	23939.3	105967	177663	129552	24006.3	75593.9	28442.7	288324	52403.8	1.03357e+06	120206	40440	18563.1	23693.2
P01702;P06316	Ig lambda chain V-I region NIG-64;Ig lambda chain V-I region BL2	47831.3	77004.6	6316.95	7446.48	36838.4	68137.9	143695	137505	36558.1	146383	42284.1	47629.5	147500	53053.5	315577	310548	56142	132212	20710.2	Filtered	240408	378807	45707.3	41115.9	79905.2	982099	173199	997364	141211	87229.1	12619.7	23515.2
P01703	Ig lambda chain V-I region NEWM	570267	762835	323978	3118946	1.74017e+06	1.47615e+06	2.05379e+06	2760653	634490	1.12417e+06	1.45895e+06	1.29463e+06	2072192	775426	6.45536e+06	4.97345e+06	2.41542e+06	1.42446e+06	1.08402e+06	6721530	5903399	9648945	2.00514e+06	1.91696e+06	1.63466e+06	7342754	3.60646e+06	17324094	4.32258e+06	2.03829e+06	689377	970561
P01707	Ig lambda chain V-II region TRO	50969	Filtered	22409.1	112005	104217	60992.2	128683	133617	23758.6	27088.6	101056	25494.7	103047	53641.9	245801	232261	126213	91086.4	69554.1	540374	234322	713953	123030	65876.5	104038	294036	119730	304697	318505	165202	129935	201578
P01714	Ig lambda chain V-III region SH	174854	284788	175854	731417	441596	351947	956180	1.11521e+06	184545	202549	185462	250651	612390	356322	1.25321e+06	1.08694e+06	386475	321800	210601	578659	1099395	1.80613e+06	359764	410510	431451	1.31588e+06	992214	2.39541e+06	732551	475122	265110	274365
P01717	Ig lambda chain V-IV region Hil	184056	445116	157770	1124060	660110	1.11864e+06	361914	1.19555e+06	791849	283423	142614	478225	526640	329360	2.76188e+06	6069653	1.03005e+06	607245	231837	4.251e+06	2292043	3.62068e+06	361522	592868	493827	1.52619e+06	2.77757e+06	6689148	5157616	2.43482e+06	423854	940224
P01719	Ig lambda chain V-V region DEL	1441.8	Filtered	Filtered	Filtered	4020	4189.44	3385.8	Filtered	Filtered	Filtered	Filtered	Filtered	8995.47	2751.61	28923.5	20560.8	Filtered	3690.86	Filtered	Filtered	44587.8	68157.2	11833.8	18117.6	22624	50446.1	Filtered	Filtered	45401.1	21952.5	Filtered	Filtered
P01742;P01761;P06326	Ig heavy chain V-I region EU;Ig heavy chain V-I region SIE;Ig heavy chain V-I region Mot	42881.2	68384.7	31626.1	111481	146900	119851	25448.5	147709	58871.5	71065.2	70673.6	52386.8	203639	70060.6	92949.7	568370	47623.6	32099.1	95101.3	294610	683091	516167	322669	264014	206830	413878	191445	1.07271e+06	34190.5	137093	162903	Filtered
P01743	Ig heavy chain V-I region HG3	162183	226535	80626.6	331499	495496	462229	384859	405779	100139	156549	104903	98979	458481	231320	818706	716313	356360	210452	145774	366723	922966	2159658	439776	378082	236937	680442	527244	1.04774e+06	452215	276058	88752	80739.1
P01763	Ig heavy chain V-III region WEA	96414.5	174467	347039	546472	256279	241082	326864	455040	423963	435623	473277	483099	1320266	777151	1.0672e+06	529712	1.1639e+06	129334	385097	545661	3.36667e+06	2389927	558904	525643	523857	963181	1.4112e+06	3113891	460169	281330	499712	693327
P01764	Ig heavy chain V-III region VH26	154246	296394	105775	684064	534168	515993	389059	321545	229571	289677	163102	214641	541052	343064	1.35195e+06	1.48275e+06	616455	341729	93947.8	676729	1.97439e+06	2478952	1.05956e+06	1078318	367952	2.02644e+06	1.01717e+06	1.86877e+06	1.14151e+06	609353	164203	189829
P01766	Ig heavy chain V-III region BRO	1.00086e+06	1.65136e+06	920332	4.50911e+06	2.43752e+06	3.06161e+06	3.45945e+06	2.8577e+06	963359	1.08497e+06	1.15549e+06	1.16347e+06	3.27458e+06	1.90195e+06	6.82871e+06	6244987	2.78344e+06	1.58481e+06	1.16387e+06	4.10025e+06	7623767	11846342	4268232	4.50854e+06	1.48515e+06	8040296	3.95943e+06	7.48788e+06	5399155	2.52849e+06	1.40799e+06	1.55483e+06
P01767	Ig heavy chain V-III region BUT	57797.3	60615.5	24082	190273	56967.8	57610.2	58954.2	347103	476688	33861.2	46674.1	91395.1	77022.7	58440	140855	287171	41744.7	13316.7	36719.6	357914	78880.6	175228	111364	91504.4	56457.8	Filtered	123397	703210	105950	84768.3	86573.7	93375.1
P01771	Ig heavy chain V-III region HIL	132668	179009	97718.2	391379	174458	161018	177826	158433	35457.3	46397.4	163010	54845.4	231260	112739	666684	532477	228074	132264	69583	166020	453292	721590	261777	194843	101119	302343	268945	1.68772e+06	210054	169563	100849	78106.8
P01772	Ig heavy chain V-III region KOL	1.58397e+06	2140244	845583	2.80386e+06	2805927	3600622	4.23179e+06	4671172	1141318	1.60085e+06	2520973	1.89732e+06	3.46312e+06	1.78706e+06	7.62321e+06	7651762	4.67862e+06	3.22379e+06	1979011	8.35718e+06	11112687	15372964	4348698	4250833	1.93538e+06	5658193	7334123	13714871	6026868	793398	1.23562e+06	1.17493e+06
P01773	Ig heavy chain V-III region BUR	34227.9	54538.8	6075.04	131021	72503.4	50220	70131.2	64401.8	32046.8	57553.4	74995	59641.6	96737.2	57990.4	392249	122985	170353	114582	43497	120923	617677	867073	95652.7	102541	40836.9	75184.9	109508	240073	203487	169435	23513.9	5136.98
P01775	Ig heavy chain V-III region LAY	Filtered	Filtered	955.457	8999.52	32269.6	Filtered	52696.9	98695.7	Filtered	2588.62	8630.89	Filtered	1350.42	Filtered	352389	351770	6838.02	21701.3	Filtered	18217.6	8732.45	50360.2	35298.9	18717.3	Filtered	Filtered	4643.18	Filtered	16831.3	21934.3	7624.33	22649.5
P01776	Ig heavy chain V-III region WAS	414940	521434	375341	2.00913e+06	875433	944709	997116	1.21726e+06	619808	1.03538e+06	386431	471267	1.16482e+06	652906	1.75225e+06	1.51131e+06	1481802	867977	539639	4.08863e+06	4.30601e+06	14561121	2101156	2.16737e+06	458257	3.02838e+06	1.99988e+06	5112983	2.82042e+06	1.15626e+06	628769	482787
P01778	Ig heavy chain V-III region ZAP	11130.1	12310.6	4561.25	22423.3	Filtered	Filtered	33649.7	46094.8	Filtered	1	9490.7	1	1884.91	2304.91	21802.8	41682.8	Filtered	185.877	5838.76	43682.3	46467.9	67500.3	Filtered	Filtered	Filtered	Filtered	7309.72	9432.78	51580.4	28728.2	9036.37	27301.5
P01779	Ig heavy chain V-III region TUR	57474	73552.8	30331	169783	138472	97014.8	195734	243551	48959	95007.7	64298.5	58955.8	114445	77752.3	316812	378601	103865	85958.8	35514.8	140803	269415	410196	246235	179280	82161.7	341979	284741	667387	160974	121085	42768.2	35797.2
P01780	Ig heavy chain V-III region JON	10489.3	20697.8	19365.7	90268.3	24149.6	31097.6	35616.6	72359.3	7313.58	11996.5	14391	20188.3	55605.4	35411.1	108358	100229	16775.8	13855.7	9054.12	67539	104090	135608	45251.9	61324.4	25387.2	104600	46422.1	97767.6	107024	41453.4	17312.7	20118.5
P01781	Ig heavy chain V-III region GAL	91590.8	162910	69934.5	392970	246253	287705	217025	245268	89111.7	107541	109985	103544	253853	136072	704649	712847	318051	171251	87607.3	475885	641303	969624	470120	333825	323400	1.24237e+06	605445	2.32589e+06	553230	276095	143085	227378
P01824	Ig heavy chain V-II region WAH	34225.5	35042.6	24695.9	80025.6	49426.8	58429.1	73661	98426.9	39771.4	57842.6	66333.8	37077.6	155373	58782.9	300217	332240	27164.5	41611	99423.9	325703	173197	328574	72672.9	71687.1	67439.2	210987	183782	510459	58918.8	74242.9	48268	73014.4
P01833	Polymeric immunoglobulin receptor	8433731	12805760	5.38614e+06	29303850	13057894	13235794	23366636	27338672	5257898	9078904	8774420	7.99124e+06	17826102	8.38823e+06	62557320	63151604	23534628	18021074	9058047	42988620	58229840	101798600	14509763	17673200	8554333	42981708	26339160	91510200	44425508	25590950	8.35502e+06	12309196
P01834	Ig kappa chain C region	2.79014e+06	4.67521e+06	2.26997e+06	10560114	5385723	5119498	6121138	6.96593e+06	2.2918e+06	3.61628e+06	4939659	3096321	6848496	3748192	14447399	16073534	6.68848e+06	4256729	4.1084e+06	16078236	22489888	38999208	5.12377e+06	5620318	5058236	18390456	8708216	23023256	13832373	8.04106e+06	2981553	3268615
P01857	Ig gamma-1 chain C region	961902	757994	313817	454582	1.82678e+06	2.36127e+06	1.26008e+06	1.29685e+06	1.91727e+06	1.80958e+06	1.44856e+06	421103	2.61103e+06	2.37541e+06	753098	849368	1.03349e+06	791975	261254	580781	1.77836e+06	3.25101e+06	4596090	4.15359e+06	3682885	22103952	3.1003e+06	2298220	1.05626e+06	531237	2.48062e+06	1.62005e+06
P01859	Ig gamma-2 chain C region	658603	457934	157391	224159	787192	1.16909e+06	911913	1.01425e+06	907500	817516	706166	312951	1369263	1.11562e+06	467440	636339	1.16426e+06	618750	110399	212235	1.13356e+06	1.74923e+06	3.42064e+06	2183907	1.56789e+06	5632028	1.72249e+06	1.63708e+06	509394	274732	1.03969e+06	732479
P01860	Ig gamma-3 chain C region	106115	63808	3547.17	4998.83	58832.5	64519.4	39845.5	53846.4	21846.7	26164.5	38436.1	19439.4	260905	295943	70041.2	76864.4	100838	39386.9	6046.53	11898	88149.4	183097	236279	122690	462302	1.3e+06	114280	147008	72686.9	34123.6	253775	83808.6
P01861	Ig gamma-4 chain C region	37501.1	27440.8	64041.7	143207	87343.6	145612	526616	505183	30166.6	24998.1	331115	15902	41703.8	70785.7	397615	577220	333166	173347	85324.1	292530	97783	144663	130563	76025.2	1.30155e+06	3827168	791367	803207	99945	30670.5	323551	103798
P01871	Ig mu chain C region	2.62092e+06	3719029	321660	1.49799e+06	3.0118e+06	2404236	671823	794098	649452	887607	337519	423529	1130877	830192	2.34353e+06	2.28958e+06	342199	243711	416373	2.06665e+06	7564514	11140084	3.58215e+06	3.6252e+06	1.52033e+06	5689756	1.77272e+06	2475603	6.30832e+06	2.3667e+06	515967	417854
P01876	Ig alpha-1 chain C region	10471747	21665912	5677983	35718700	20790742	18277186	40141024	47854608	12934231	19650760	18970776	15070253	41353880	20836916	168881472	162236016	47348864	33579560	13929135	68885192	102637456	192666752	27365482	28660946	18025226	81773256	54292296	195174672	100332328	52828484	16232166	22403190
P01877	Ig alpha-2 chain C region	20057352	39907584	20930022	107300560	56589288	57553668	73065016	88714440	23424316	37712452	37845232	29572608	72711824	39279388	274145632	250784304	78151320	32365096	38681628	186630208	256821872	467602272	59407664	73585264	39656472	255831424	110792064	380970272	90283048	90578936	28064136	33207404
P01880	Ig delta chain C region	28830.2	7888.35	Filtered	Filtered	21421.9	26723.3	Filtered	Filtered	Filtered	Filtered	Filtered	Filtered	Filtered	Filtered	Filtered	Filtered	1939.68	Filtered	3933.36	27624.7	13757.8	Filtered	2707.58	Filtered	64137.8	91299.4	3042.05	Filtered	Filtered	Filtered	8998.66	Filtered
P02144	Myoglobin	22785.3	30056.3	9460.15	21652.3	16214.2	25673.3	39005.4	38207.7	20373.6	24227.9	22130.7	33586.1	8247.82	4747.36	47626.3	77743.4	34241.9	25881.9	18296.5	79803.4	70754.2	5865.73	6823.25	3691.44	32381.2	36000.1	18120.6	21241	27769	10510.8	6214.78	17219.7
P02511	Alpha-crystallin B chain	33574.5	46012	43995.8	70234.2	45020.1	49872.7	57843.4	56440.6	45413.7	40055.8	61441.1	57543	41786.2	39369.6	78198.7	91500.1	43220.4	58760.8	121277	93986.9	78292.1	68913.5	32042.1	23640.4	32586.4	54162.9	55728.9	96280.1	54849.5	58035.1	67108.3	65063.9
P02538;P48668	Keratin, type II cytoskeletal 6A;Keratin, type II cytoskeletal 6C	71350.6	22235	11654.2	10332.8	26223.3	34299.9	12397.5	14025.3	18601.7	24591.8	10258.5	8089.82	7847.06	20042.3	8006.31	9663.24	33187.6	15516.7	8352.87	32932.8	35877.2	33793.4	16632.4	10697.9	70545.1	98740.4	17031.1	8152.12	9696.15	10207.3	16917.8	8856.41
P02545	Prelamin-A/C	128140	120891	143681	23633	53658.4	44102.8	6308.86	33084.8	86553.1	99886.9	21740.1	79133.1	8787	6350.99	7917.82	7103.91	36316	54430.3	154166	129073	60508.4	51179.6	34954.5	28455.4	225254	146896	33528.5	310488	38368.5	44732.5	20664.9	26300
P02647	Apolipoprotein A-I	1.20674e+06	534620	212976	170091	320584	694053	356703	364525	817389	510483	161225	121694	243281	274307	167899	196397	325099	112022	32221.1	63369	686828	1.2025e+06	1.1603e+06	735234	1.13788e+06	2.96162e+06	680867	527058	237278	107071	691778	483378
P02649	Apolipoprotein E	28366.1	11220.5	2042.81	3786.33	7097.37	16822.2	9111.34	9329.73	30049	11593.3	Filtered	3657.52	5457.08	5505.4	1615.82	Filtered	7581.75	Filtered	4690.24	Filtered	6342.41	24376.8	18296.1	12087.3	9778.64	63159.5	10236.1	Filtered	Filtered	Filtered	12499	11201.2
P02652	Apolipoprotein A-II	293528	167225	52064.8	101890	130978	216577	108832	125801	232373	125037	36804.4	32409.3	73986.2	75162.6	61299.6	150019	126191	26873.7	18489.7	23415.8	127327	234477	265312	174300	213589	1.26766e+06	224061	160396	45630.8	53998.2	203541	93970.5
P02654	Apolipoprotein C-I	17635	4558.4	824.345	Filtered	3546.86	13029.4	Filtered	Filtered	12062.5	6386.02	Filtered	Filtered	2576.01	Filtered	Filtered	Filtered	Filtered	1629.77	Filtered	Filtered	Filtered	Filtered	18460.9	13656.9	25816.2	Filtered	6656.58	Filtered	Filtered	Filtered	12408.7	Filtered
P02656	Apolipoprotein C-III	82645.8	48453.3	9104.16	17185.9	34609.5	51698.4	44357.7	81792.9	72407.4	45680.2	15675.8	6376.6	16025.9	19216	14436.3	21619.8	28774	12487	1044.89	1394.54	59960.4	155592	46888.8	50104.5	126579	1.43728e+06	50194.2	194883	34346.6	10200	62915.8	44148.8
P02671	Fibrinogen alpha chain	648304	286726	82253.1	108121	624748	1.4773e+06	97775.9	196036	109927	149311	131112	93110.6	112094	173615	77019.5	68415.7	128496	50010.7	20877.1	109844	422960	751262	361664	197140	548479	2628359	233236	595350	225855	101768	125422	110107
P02675	Fibrinogen beta chain	388851	175662	34085.4	56506.4	326684	639056	44835.8	85032.8	45239.4	68905.2	62750.2	46574.3	65880.7	89001.1	37539.9	33594.4	75130.5	23073.6	8086.78	19488.3	296852	401119	261395	97300.4	319279	1595502	131300	316286	121132	45378.1	64135.2	65547.1
P02679	Fibrinogen gamma chain	376058	195979	47317.3	60981.1	391365	789230	49352.2	123205	61272.2	87553.3	80512	49914.4	71002.5	110191	50084.3	50184.2	94488.8	30701.7	11952.2	47583.4	364673	398754	282158	123032	489318	1.55123e+06	157372	329030	126205	66830.5	78263.3	79162.4
P02741	C-reactive protein	11619.8	8119.61	1154.13	Filtered	33870.8	52536.3	Filtered	Filtered	13576.4	11477.4	Filtered	Filtered	Filtered	Filtered	Filtered	Filtered	Filtered	Filtered	Filtered	Filtered	Filtered	Filtered	10012.7	7843.12	Filtered	Filtered	Filtered	Filtered	Filtered	Filtered	6004.74	Filtered
P02745	Complement C1q subcomponent subunit A	19745.1	8566.26	Filtered	Filtered	25886.8	54717.4	Filtered	Filtered	10268.3	14852.4	8400.78	Filtered	21713.4	21368.3	Filtered	Filtered	Filtered	Filtered	Filtered	Filtered	12756.7	29833	68245.2	52341.5	57003.3	122173	Filtered	Filtered	Filtered	Filtered	38321	15778.1
P02746	Complement C1q subcomponent subunit B	16983.2	4363.57	2449.41	Filtered	25780.3	47415.6	9198.87	6278.52	20181.3	17593.9	3635.91	1920.72	24894.3	15972.6	7631.56	Filtered	20077	14660.2	Filtered	Filtered	12806.7	26374.7	73496.2	40777.9	43753.7	98818.5	16535.9	Filtered	13677.3	6998.57	28641	9198.04
P02747	Complement C1q subcomponent subunit C	163409	15371.2	100227	112806	307004	542217	425020	292363	130598	125163	60517	7624.83	646340	706517	652211	17254.4	392341	220633	3637.46	8105.5	135786	39996.6	243446	785183	397079	1.86556e+06	592043	Filtered	16034.2	6272.89	249809	308276
P02748	Complement component C9	31029.7	16175.4	8462.57	8883.56	58163	77326.8	35033.6	16719.3	48731.6	48202	7877.16	8001.72	38188.1	22637	8234.37	11635.7	24343.9	12402.4	2291.6	5560.64	36105	50871.6	107767	83034.5	51208.4	85944.1	46898.8	17590.3	34967.8	11986.5	78085	35006.9
P02749	Beta-2-glycoprotein 1	170818	36039	25670	38554.2	130694	194847	169321	133498	153474	144034	67405.6	46609.2	88209.3	83121.1	61958.6	61712.4	74506	43553	5106.78	41993.9	101969	193292	233434	107663	254228	847981	78843.8	88950.1	120288	74843.6	87685.4	27690.4
P02750	Leucine-rich alpha-2-glycoprotein	54540.1	48672.6	27294.6	86500.7	98763.8	132308	113729	111757	34834.6	78582.2	73043.6	45009.1	73170	46200.8	73210.6	77295.4	82311.1	39515.3	41970.7	127612	99188.2	98761.9	158227	107958	121891	186459	99184.2	284171	132982	46760.7	87593.4	66295.9
P02751	Fibronectin	26298.7	11758.4	4185.34	5894.06	22423.6	46661.1	4734.25	11450.3	7123.8	7430.95	7848	3759.32	10379.7	9153.94	9281.92	Filtered	8912.06	4503.44	777.183	Filtered	29584.8	44960.2	14825.5	7875.74	61880.7	235742	7680.7	Filtered	17061.2	2813.9	6135.06	7724.14
P02753	Retinol-binding protein 4	29723.1	14080.3	4650.38	Filtered	7815.82	9728.57	8341.48	9028.03	4635.42	6195.14	3789.75	2986.05	5941.13	9019.33	2134.56	Filtered	11115.3	4597.21	Filtered	Filtered	6007.49	Filtered	38857.7	19540.2	28679.4	57689.2	Filtered	Filtered	Filtered	8215.49	22791.7	4442.26
P02760	Protein AMBP	166079	90730.4	28482.4	48676.8	107816	202352	142205	153925	111597	87293.4	64141	40929.7	109841	118369	33618.4	39653.1	119553	54140.9	28863	47534.6	143418	109856	225214	192360	281961	549325	109482	106888	126346	60469.1	170934	83907.7
P02763	Alpha-1-acid glycoprotein 1	245468	168337	57920.6	78222.6	377534	659878	178846	154708	183166	202423	65451.1	84939.1	129682	116994	69744.9	110504	342160	172327	97986.6	132955	232530	333927	790806	459136	305586	718412	342693	228598	320771	127691	508928	164682
P02765	Alpha-2-HS-glycoprotein	135413	106639	31219.5	72308.9	78001	144137	212535	211746	118402	120644	85388.3	84395.9	210198	175579	167158	214352	239530	102647	34334	134430	120565	205957	265758	213562	485639	1.6801e+06	178935	230404	118883	60252.8	210436	91471.1
P02766	Transthyretin	20928.1	19414.6	5964.72	24628.4	26801.1	30154.9	36100.1	45399.5	14616.5	13606.4	17286.3	9182.26	16617.6	15925.3	13728.2	21888.8	30385.6	21175.4	13776.6	41670.9	45621.6	25707.9	20808.8	15757.1	66638.6	115159	35179.3	25194.1	59867.1	20776.8	26314	16479.1
P02768	Serum albumin	65750448	62203816	18413960	26389150	69632560	103258280	91999912	97523536	71052304	72251632	56967960	36817148	68385912	63791700	45148964	56555176	94869360	56422120	18379774	43586964	85063008	146237440	149114128	119828144	175237088	611945344	98513000	70435648	67088324	30843760	102987056	44482864
P02774	Vitamin D-binding protein	175442	146185	47910.3	85434.4	156460	204044	186299	193287	132039	107957	96589.8	57022.8	109151	111649	111594	140879	177136	83069.8	36095.1	61343.9	186204	311623	198298	176155	310148	799953	169440	129149	158752	74324.9	168227	106387
P02778	C-X-C motif chemokine 10	Filtered	Filtered	Filtered	7272.96	6122.96	3180.54	Filtered	Filtered	Filtered	3936.58	12317.5	12322.3	86555.2	50447.7	562662	524040	23469.3	Filtered	8650.09	Filtered	70427.4	137325	144013	188440	55934.5	300012	35946.2	195095	Filtered	9853.51	11814.7	19548.2
P02787	Serotransferrin	2683778	2.02716e+06	243678	557223	1.90272e+06	1.85952e+06	1.34882e+06	1.41175e+06	1.29865e+06	1.83504e+06	1.58233e+06	827159	1.99056e+06	1.54013e+06	1.53363e+06	1.81628e+06	1515219	733058	552335	1.26621e+06	2.30906e+06	3876015	6033303	4.34929e+06	4.68438e+06	15326075	2.96864e+06	2279232	1540883	837832	1.75863e+06	627449
P02788	Lactotransferrin	15304954	40392612	2.73047e+06	42124508	75960424	78615184	61043464	67165960	22958456	58101692	94529696	39227240	41852504	30244540	334045536	367351360	62908640	45366368	61673232	336432960	297664640	562407680	59393784	60325608	111438088	918910336	101299128	821532480	69272792	66055252	26907758	42265876
P02790	Hemopexin	1.90257e+06	1.37367e+06	386135	782272	1.41646e+06	2.39178e+06	1967259	2.30953e+06	1.65056e+06	1.65035e+06	781012	587502	1.02646e+06	1.05018e+06	988249	1.50909e+06	1.86966e+06	1.07231e+06	322926	805361	969233	1.89601e+06	2.99818e+06	2.3195e+06	2725463	9997561	1.81351e+06	1.67412e+06	1.58478e+06	844225	1.67398e+06	810605
P02814	Submaxillary gland androgen-regulated protein 3B	13470.5	20418.2	12694.3	99406.5	143969	74623.1	100869	152290	11697.1	72408.3	60204.1	34440.2	34047.8	26783.3	71564.3	56639	7010712	5454760	3.07753e+06	35816500	12259292	34633864	27102.2	23717.5	9934357	56414996	69532.4	271522	246370	286265	57216.9	185692
P03950	Angiogenin	6599.63	14508.4	2875.33	15570.3	27400.7	33012.6	43212.4	40527	14959	21457.6	26118.8	13940.9	19561.8	8323.2	26101.3	24533.3	22707.8	20082.4	19430.6	50966.8	41236.5	48780.1	16405.4	21905	37576.1	274554	53298.6	472866	18973.7	16186.3	19350.8	20650.6
P03952	Plasma kallikrein	13248.9	6390.63	3166.5	Filtered	7939.41	23334.2	5885.82	12229.3	13352.3	11973.8	Filtered	1641.44	4616.42	6588.37	Filtered	Filtered	8979.36	2135.98	Filtered	Filtered	Filtered	Filtered	25694.8	15970.1	14543.7	40802	18741	Filtered	12094.6	2828.81	15413.5	4283.33
P03973	Antileukoproteinase	452175	964671	184844	1.32952e+06	1.23461e+06	1.29046e+06	2.21141e+06	2385563	544725	688496	1894821	840144	783104	528496	3849874	4.21279e+06	1.61329e+06	1.04086e+06	1.9056e+06	8728603	4.09241e+06	5.68765e+06	1.10362e+06	1.50639e+06	2.19346e+06	7.88489e+06	2.0245e+06	12289622	4.17559e+06	3.74335e+06	510791	982756
P04003	C4b-binding protein alpha chain	54930.1	19904.9	4250.11	1832.9	53034.4	122454	18634.7	17859	52461.3	41001	6295.05	6377.34	9157.37	22675	21886.3	13773.4	29305.9	10131.9	Filtered	Filtered	77000	64355	85792.8	61307.6	95597	290852	53270.2	7772.78	27376.1	10054.7	42891.2	41147.8
P04004	Vitronectin	121811	72069.6	19794.2	30885.9	114623	213098	67781.4	74573.9	88297.1	74145.5	54072.3	29337.2	61385.9	51787.1	65052.1	85957.6	53809	32434.8	14191.8	48844.3	81974.5	143412	219236	119466	271043	888018	140453	140780	86754.8	43106.3	103590	71769.9
P04040	Catalase	4344.08	1751.5	2013.46	1925.5	7061.87	3909.51	8730.74	10899.4	3451.96	4992.29	10145.2	4650.89	3103.77	2315.39	4418.59	5156.83	23225.6	18665.6	Filtered	Filtered	Filtered	Filtered	3918.19	3195.64	Filtered	Filtered	5816.79	Filtered	14289.9	8038.82	1387.28	3159.5
P04062	Glucosylceramidase	Filtered	Filtered	2235.45	5877.12	3973.33	2781.64	4591.51	Filtered	3675.74	3742.32	4212.74	2423.47	Filtered	2502.69	3584.47	4649.09	Filtered	2377.53	6556	12866.7	7080.04	Filtered	3912.87	1363.53	Filtered	Filtered	4970.18	17773.1	6647.94	2025.25	5114.49	5009.86
P04066	Tissue alpha-L-fucosidase	27006.7	30700.4	21189.6	39357.6	26344.3	18555.5	32786.8	41681.2	14182.1	14845.1	35918.9	19434	32483.9	24353.3	43201.6	55411.6	75642.7	34935.1	43559.1	169891	63859.2	46925.1	33222.8	21619.8	58955.4	89503.6	24168.9	122709	64828.1	32015.2	83444.9	60031.8
P04075	Fructose-bisphosphate aldolase A	241562	271633	296627	423702	288201	250279	522218	462305	373586	489677	387689	453819	424433	338627	544582	549438	583829	487231	394733	486679	438621	393625	299695	359037	301500	291738	390055	466579	348736	296606	414125	553902
P04080	Cystatin-B	81812.5	95724.7	77885.3	253000	143849	106891	224796	260456	72998.9	124603	133332	93730.1	120712	91724.8	125346	149946	106248	118724	74323.4	154339	89622.7	84525.8	69835.8	72604.1	41917.9	109057	61649.8	166377	126726	76690	94576	242098
P04083	Annexin A1	1.88894e+06	1.97641e+06	1.15792e+06	2.03096e+06	1792217	2.08168e+06	3.22675e+06	3.23191e+06	1.86271e+06	2108347	2.26526e+06	2.77847e+06	946053	875795	2.94974e+06	2.75502e+06	2.65364e+06	2.45948e+06	1.56482e+06	2513418	1.86014e+06	1403660	1.50669e+06	1.10764e+06	1388341	2.5207e+06	1603242	4289578	1.70455e+06	1428245	1103874	1.87585e+06
P04114	Apolipoprotein B-100	5871.61	2529.27	2618.65	3949.45	8403.93	2330.97	12141	4018.73	6449.97	3567.25	10156.3	15082	7548.46	1788.34	13479.2	Filtered	7965.13	12128.5	3941.71	4377.31	8060.47	4916.99	8981.83	3591.63	7452.32	21541.3	4224.19	Filtered	Filtered	2767.18	3452.25	6444.59
P04155	Trefoil factor 1	21011.4	35698.6	31925.8	5454.83	22211.7	26899.5	3855.44	6655.93	50144.9	74758.1	82162.2	124532	Filtered	Filtered	Filtered	Filtered	104440	39141	45926.8	237806	50365.1	79668	27474.3	28574.2	3242.14	Filtered	52854.8	132706	64290.5	23387.4	59582.8	45989.9
P04179	Superoxide dismutase [Mn], mitochondrial	7981.97	12357.3	9522.82	3254.98	22610.5	15429.4	32238.6	24901.6	11182.5	15006.2	1399.44	8957.78	31697	48240.5	13133.4	Filtered	10642.7	6953.21	6154.46	16282.4	40490.7	Filtered	15984.7	13485.4	62136.3	59791.1	17322.7	Filtered	28875.6	33147.3	20048.5	12590.9
P04196	Histidine-rich glycoprotein	75069.3	39304.6	17382.4	23173.8	43996.9	64793.5	53602.8	60356.2	62979	63200.8	23519.8	25755.9	96532.5	91014.7	14129.8	32794.1	43841.1	20757.4	2814.27	2277.13	47737.3	92915.4	136784	88357.4	174297	624582	44059.3	Filtered	37063.1	13758.7	100800	64363.9
P04207	Ig kappa chain V-III region CLL	5159.48	9446.8	8386.72	38564.5	17980.7	14004.4	38618	37406.7	7953.26	7715.66	48695.1	4796.18	21150	8936.65	79111.1	79528.7	44410.7	22694.6	24626.9	32103.7	219001	353893	17553.3	28298.5	14224.5	169045	66628.5	384285	60732.6	55584.4	7200.45	14133.6
P04209	Ig lambda chain V-II region NIG-84	Filtered	Filtered	7757.63	38636.5	16065	7484.97	43162	39752.8	3204.28	2887.75	8244.01	2219.44	31466.5	15628.3	28219.3	35750.9	48203.3	26857.3	5161.81	Filtered	114331	147017	29233.9	20660.7	30991.8	Filtered	42383.4	52144.7	47779	9489.44	18974.2	5189.31
P04211	Ig lambda chain V region 4A	116299	224806	52428.2	262929	129502	210790	338308	362258	89636.7	113591	66791.2	116788	301959	235017	1.07913e+06	860834	567592	219900	121635	836294	1.38298e+06	1.68345e+06	408203	420911	121124	844628	336756	1.24219e+06	490802	321795	171500	164562
P04217	Alpha-1B-glycoprotein	169203	108145	27422	52658.6	116970	181872	145342	196435	103177	161049	61644.8	57915.8	100651	112706	74948.3	113212	118698	64432.5	20563.2	80959.8	122843	281951	244100	184344	271322	1.2364e+06	179249	129041	291074	53908.6	161541	72739.3
P04220	Ig mu heavy chain disease protein	132875	214871	25479.7	73753.6	223156	175149	10747.9	11768.4	35457.7	33621.2	4924.67	14543.9	72519.2	30680.9	130541	110957	20624.6	6297.39	24412.9	77436.2	381121	702626	129841	151224	71305.1	253500	69686.3	93289.9	399611	120668	13645.8	12982.1
P04229;P13760;P13761;P79483;Q29974;Q30134;Q30154;Q9GIY3;Q9TQE0	HLA class II histocompatibility antigen, DRB1-1 beta chain;HLA class II histocompatibility antigen, DRB1-4 beta chain;HLA class II histocompatibility antigen, DRB1-7 beta chain;HLA class II histocompatibility antigen, DR beta 3 chain;HLA class II histocompatibility antigen, DRB1-16 beta chain;HLA class II histocompatibility antigen, DRB1-8 beta chain;HLA class II histocompatibility antigen, DR be…	Filtered	Filtered	Filtered	Filtered	Filtered	Filtered	Filtered	Filtered	Filtered	Filtered	Filtered	Filtered	14760.4	15482.7	Filtered	Filtered	Filtered	Filtered	Filtered	Filtered	Filtered	Filtered	Filtered	Filtered	Filtered	Filtered	Filtered	Filtered	Filtered	Filtered	7975.91	Filtered
P04233	HLA class II histocompatibility antigen gamma chain	Filtered	Filtered	Filtered	Filtered	Filtered	Filtered	Filtered	Filtered	Filtered	Filtered	Filtered	Filtered	6514.31	7051.93	4361.27	26531.5	Filtered	Filtered	Filtered	Filtered	Filtered	Filtered	3166.58	Filtered	Filtered	Filtered	Filtered	Filtered	Filtered	Filtered	12551.7	Filtered
P04264	Keratin, type II cytoskeletal 1	20611.1	24832.1	7183.79	147143	54466	33477.7	97955.2	68960.8	44704.9	21019.1	16864.2	436.49	3273.33	940.093	15638.5	34841.7	7083.17	5763.07	4831.35	7492.33	16594.5	16210.5	2366.36	3984.58	16639.2	35557	19495.6	37400.5	19755.3	4237.98	15604.7	44055.6
P04406	Glyceraldehyde-3-phosphate dehydrogenase	1184214	1.21537e+06	1.0638e+06	1.75658e+06	1.20965e+06	1.05261e+06	1.30581e+06	1374763	889117	1285497	1.41268e+06	1334365	1374924	1.38845e+06	1.90612e+06	1.44807e+06	1.26018e+06	1400207	1.71722e+06	1648780	1.80672e+06	1.79291e+06	1.40018e+06	996383	1.04337e+06	1.48786e+06	1.41937e+06	1.8504e+06	1.76499e+06	1.46126e+06	1.66826e+06	1.62412e+06
P04424	Argininosuccinate lyase	4739.13	7459.34	4864.45	11459.4	11624.7	11157.7	11316.6	Filtered	6851.92	10469.1	9511.85	9308.86	11435.3	5990.71	6364.93	7452.02	8332.47	9586.51	8066.18	Filtered	11594.1	Filtered	Filtered	3580.65	1559.26	Filtered	4248.81	Filtered	Filtered	12959.9	11478.2	8328.26
P04430	Ig kappa chain V-I region BAN	44473	70288.8	126576	38867.7	35287.2	41268.9	17818.4	38901.7	59059.2	55467	81421.4	3360.32	170884	32590.8	253386	109183	155398	52777.7	13623.5	280294	414559	558098	89336.4	124602	132166	493854	352503	1.43762e+06	134772	2965.54	103699	169010
P04431	Ig kappa chain V-I region Walker	Filtered	Filtered	Filtered	Filtered	Filtered	Filtered	Filtered	Filtered	Filtered	Filtered	Filtered	Filtered	Filtered	Filtered	57576.1	32472.9	Filtered	Filtered	Filtered	Filtered	Filtered	Filtered	Filtered	Filtered	Filtered	Filtered	Filtered	Filtered	Filtered	Filtered	Filtered	Filtered
P04433	Ig kappa chain V-III region VG (Fragment)	353639	448223	268283	806280	718624	1.75898e+06	1.63686e+06	1.85632e+06	413290	1.04521e+06	1.02848e+06	537298	850370	520652	2.24142e+06	2.25776e+06	1478513	1.05133e+06	634634	2566149	3.6286e+06	5.36422e+06	1.3212e+06	1.34986e+06	811341	2.84902e+06	2.53147e+06	4.81107e+06	2.40618e+06	1.75185e+06	861488	619816
P04434	Ig kappa chain V-III region VH (Fragment)	281112	387727	201664	247913	754285	734841	378445	281577	161813	200089	166180	144737	1.0576e+06	304163	1.40144e+06	568741	299390	213123	123060	989363	1.04186e+06	1.90083e+06	502225	399953	420745	2.35183e+06	940839	3730392	90436.5	342469	312086	511237
P04632	Calpain small subunit 1	131015	207432	135777	251721	157540	175699	222791	268604	190060	207093	214213	208121	149416	147412	345280	357454	313297	248011	230236	313217	334416	365356	174215	152835	161006	225765	223819	504602	231161	230369	166329	237669
P04745	Alpha-amylase 1	25736.9	32270.3	3228.95	24442.3	55860.7	47864.4	6786.03	13304.8	14330.3	26856.5	35262.4	11471.5	13599.5	9046.34	76007.6	62712.6	2604.8	1590.78	3907.11	25166.1	51064.9	118913	2682.17	4132.15	25445.4	232758	10348.5	297070	24119.2	21319.6	36740.2	78668.8
P04792	Heat shock protein beta-1	1.21681e+06	1.70885e+06	1.65105e+06	2.57709e+06	1.48638e+06	1.41017e+06	2.97381e+06	3050084	1.00563e+06	862435	2.06516e+06	1.62141e+06	2.13444e+06	1.82249e+06	2.60971e+06	1737966	1.39165e+06	2.18644e+06	3.12827e+06	1.68846e+06	2.22714e+06	2231377	1678595	1.19776e+06	790996	962128	2.00278e+06	2354966	2.06193e+06	2.71396e+06	3.16448e+06	2.70433e+06
P04899	Guanine nucleotide-binding protein G(i) subunit alpha-2	12867.2	13425.4	6620.7	17734.2	18509.2	21298.5	13450.7	16280.9	6351.91	7485.78	24348	13261.3	11612.6	7416.74	Filtered	31493.8	5644.33	7477.02	3742	Filtered	42367.2	Filtered	Filtered	8919.99	23200.4	Filtered	28141.5	Filtered	23476.1	13330.5	10017.4	7697.23
P04908;P0C0S8;P20671;Q16777;Q6FI13;Q7L7L0;Q93077;Q96KK5;Q99878;Q9BTM1	Histone H2A type 1-B/E;Histone H2A type 1;Histone H2A type 1-D;Histone H2A type 2-C;Histone H2A type 2-A;Histone H2A type 3;Histone H2A type 1-C;Histone H2A type 1-H;Histone H2A type 1-J;Histone H2A.J	14183.3	20107.5	13558.3	15521.1	30001.8	40011.5	61321.2	69559.1	17766.1	23988.1	27447.5	6999.37	32014.5	48665.4	64382.1	25772.2	110056	122184	20795.7	21342.5	19326.8	27118.9	51175.2	74762.6	59187.7	49862.5	51405	91258.5	33813.2	32914.8	22365.1	24826.1
P05026	Sodium/potassium-transporting ATPase subunit beta-1	1203.9	Filtered	3354.19	Filtered	Filtered	Filtered	Filtered	Filtered	2876.24	Filtered	Filtered	3075.62	Filtered	Filtered	Filtered	Filtered	Filtered	Filtered	2782.68	Filtered	Filtered	Filtered	Filtered	Filtered	6152.54	Filtered	Filtered	Filtered	Filtered	Filtered	Filtered	Filtered
P05089	Arginase-1	Filtered	Filtered	1209.94	6310.85	3935.26	Filtered	Filtered	Filtered	10356.2	963.847	2924.2	Filtered	683.805	1327.14	Filtered	8026.83	9359.99	6099.01	1977.79	4392.48	Filtered	Filtered	Filtered	4088.58	12882.5	Filtered	Filtered	44301.4	26984.6	7372.14	Filtered	63690.6
P05090	Apolipoprotein D	125591	135086	12901.4	35848.3	61619.7	109330	164611	175362	144114	66251.9	135041	20370.1	44341.4	35727.3	102252	343645	70176	188905	48848.2	109596	143592	215064	208168	188492	494440	3.27068e+06	82342.7	589717	133343	55783	66882.8	61089.9
P05091	Aldehyde dehydrogenase, mitochondrial	380250	325327	151166	266426	130202	282334	418104	369166	250586	314272	257802	537363	135931	322668	64745.4	60544	86252.2	65084.7	121802	Filtered	32059.4	Filtered	348925	335691	16930.6	Filtered	329924	Filtered	49404.6	51909.4	292612	42557.5
P05109	Protein S100-A8	562237	652169	1.16788e+06	1.25584e+06	726958	825421	685240	938058	327975	509404	508285	848002	736622	790476	430943	509430	840671	1124016	418762	325224	887685	972060	883262	446191	243678	713245	873027	1.13469e+06	1.916e+06	1549209	630396	738655
P05120	Plasminogen activator inhibitor 2	2444.82	5953.63	12012.6	26096.6	4847.13	9276.38	10407.2	Filtered	7210.14	3816.91	3572.19	9715.17	8578.79	10278.6	Filtered	Filtered	11894.3	20090.5	17579.2	Filtered	Filtered	Filtered	5684.71	8135.78	1857.09	Filtered	Filtered	Filtered	11361.7	13843.4	9133.98	19304.5
P05154	Plasma serine protease inhibitor	1550.57	Filtered	Filtered	Filtered	Filtered	2407.6	Filtered	Filtered	Filtered	Filtered	585.394	Filtered	1896.74	1051.1	Filtered	Filtered	3307.25	Filtered	Filtered	Filtered	Filtered	Filtered	3182.71	Filtered	Filtered	Filtered	Filtered	Filtered	Filtered	Filtered	Filtered	Filtered
P05155	Plasma protease C1 inhibitor	410458	257087	68115.9	111818	243740	342631	247661	308128	241436	253418	113596	74236.9	219216	201740	419973	421147	189084	99068.5	28388.9	161051	203566	365339	577709	418382	494915	1.69307e+06	223437	170227	205756	95803.5	333284	172444
P05156	Complement factor I	22142.9	13061.7	3612.84	8773.46	21753.7	34992.7	16544.9	23083.5	16403.6	17496.5	12647.4	8855.05	12134	8686.38	15942.2	9885.88	6302.28	5352.44	5047.31	13447.9	16923	33360.8	33900.1	42864.3	44580.5	143427	21323.6	18824.6	18546.5	8979.67	23943.2	14223.1
P05161	Ubiquitin-like protein ISG15	5745.04	Filtered	3819.35	Filtered	1942.18	Filtered	Filtered	Filtered	Filtered	829.938	Filtered	2104.14	25180.4	32312.4	Filtered	Filtered	Filtered	1196.23	Filtered	Filtered	Filtered	Filtered	8003.16	16336.5	Filtered	Filtered	20700.6	Filtered	Filtered	3087.46	12243.1	16193.8
P05164	Myeloperoxidase	1972.25	Filtered	1295.48	31660.3	42620.1	38283.5	10257.2	23096.3	6196.69	24817.8	24864.7	4475.99	17203.9	3714.62	9374.71	Filtered	104462	95754.8	Filtered	Filtered	8376.73	Filtered	21554.7	7918.07	Filtered	Filtered	6964.83	17521.8	28877.8	14363.5	10903.9	2227.74
P05186	Alkaline phosphatase, tissue-nonspecific isozyme	10228.3	12478.9	1803.01	12981	14730.6	7105.97	4193.89	4568.79	6407.23	5737.91	10705.2	7657.89	1674.93	663.086	8761.19	6834.98	7502.82	4659.75	4877.86	33063.9	16160.9	28712.8	3330.98	3469.87	7481.83	20221.3	4853.55	44015.3	7944.41	5496.33	Filtered	1482.8
P05198	Eukaryotic translation initiation factor 2 subunit 1	3859.75	7134.82	3513.64	Filtered	5358.95	6399.26	6412.16	9079.85	7773.58	5715.64	11374	8201.58	7639.81	7858.69	5135.7	2856.15	5135.95	5379.76	14091.9	11157.7	9989.51	Filtered	7456.49	9847.45	4516.95	Filtered	12258.4	Filtered	Filtered	2297.29	9790.42	9677.99
P05362	Intercellular adhesion molecule 1	Filtered	Filtered	Filtered	Filtered	Filtered	Filtered	Filtered	Filtered	Filtered	Filtered	Filtered	Filtered	7772.61	4162.83	40733.9	30918.9	Filtered	Filtered	Filtered	Filtered	Filtered	Filtered	8325.25	9394.22	Filtered	Filtered	Filtered	Filtered	Filtered	Filtered	Filtered	Filtered
P05386	60S acidic ribosomal protein P1	24321.4	29057.1	36440.4	33669.5	39551.4	18509.6	16038.3	Filtered	28010	36365.1	26431.5	24573.6	27439.9	32212.9	12566.3	16524	21443.5	23992.2	35588	30816.5	34563.3	Filtered	16477.7	26301.7	40143.7	Filtered	20011.6	Filtered	Filtered	33915.3	31411.5	13705.8
P05387	60S acidic ribosomal protein P2	53492.2	47974.8	46771.9	32044.7	58443.2	39778.4	42177.3	41570.1	44088.4	44786.6	39994.8	37756.1	51142.4	47581.9	49456.5	36144.9	32793	37054.1	56188.7	72680.6	63429.7	110764	53915.8	60554.5	94620.8	94424.2	38169.6	104068	56511.2	63402.6	50845.4	45280
P05388	60S acidic ribosomal protein P0	21346.2	21654	19553.5	10931.7	21763.5	18342.4	14238	14308.5	18182.8	21067	19772.8	13334.3	18144.4	19044.1	12392.9	10232.5	13957	19376.4	26293.2	28868.6	32656.1	19777.1	24304.4	26830.6	35505.1	28625.5	21221	11812.5	23570.4	30678.5	23796.7	10033.5
P05452	Tetranectin	17896.7	16893.8	2724.09	9460.61	28478.7	45842.2	27062.9	20320.5	18420.3	10718.4	17496.5	5150.99	25186.3	21629.1	Filtered	Filtered	33587.3	33236.7	3811.33	Filtered	19984.9	Filtered	19165.7	9265.78	52400.8	124548	26846.6	10672.4	30861.4	11978.6	18791.4	12392.1
P05455	Lupus La protein	3225.96	2335.11	2864.97	Filtered	1559.42	1882.63	Filtered	Filtered	1885.81	2081.45	3558.19	1819.22	5359.07	5108.58	Filtered	Filtered	Filtered	4048.63	7085.23	Filtered	8450.77	19651.2	4413.95	6662.58	11524.3	Filtered	6356.62	Filtered	3736.57	3924.67	3276.46	Filtered
P05543	Thyroxine-binding globulin	5919.47	3178.54	182174	392194	156187	46837.4	441689	278132	8345.56	49687.4	77286.7	101611	158882	5279.09	872565	811618	396913	570685	809306	1.36463e+06	447192	787903	22006	12179.3	299335	308276	349453	662809	435532	299690	8195.92	459739
P05546	Heparin cofactor 2	51613.9	27778.1	7289.55	4610.15	29880.5	51287.7	18698.1	18929.5	31266.2	29508.8	15008.1	8372.55	25070.5	29578.4	4475.06	43946.2	33000.9	13066.4	11521.6	107053	15587.7	50496.7	97029.5	57479.7	68257.9	183631	27287.6	Filtered	20224	9136.93	48202.8	17676
P05783	Keratin, type I cytoskeletal 18	5900.85	Filtered	1215.37	Filtered	Filtered	Filtered	Filtered	Filtered	3397.91	Filtered	Filtered	Filtered	Filtered	Filtered	Filtered	Filtered	Filtered	Filtered	Filtered	Filtered	Filtered	Filtered	Filtered	Filtered	Filtered	Filtered	Filtered	Filtered	Filtered	Filtered	Filtered	Filtered
P05787	Keratin, type II cytoskeletal 8	131998	59283.2	39942.6	18362.3	65662.9	52140.8	48692.1	85962.4	57548.2	107760	70352	35394	19742.3	30229.7	15743	26521.4	70189.1	42159.4	25493.8	259668	68064.3	87160.7	27065.2	28150.5	152055	212130	67699.4	137151	45974.7	53933	62709.1	29115.6
P06132	Uroporphyrinogen decarboxylase	6221.45	4488.64	5378.05	7036.55	Filtered	Filtered	5366.87	Filtered	4092.13	3640.38	Filtered	4382.04	2883.17	1193.07	Filtered	Filtered	3169.49	9473.7	6487.14	Filtered	Filtered	Filtered	5281.51	4394.99	Filtered	Filtered	Filtered	Filtered	Filtered	Filtered	4738.06	5178.37
P06311	Ig kappa chain V-III region IARC/BL41	806.376	3119.17	3222.17	12268.5	7610.43	9357.95	5362.31	9858.88	3227.39	4577.58	2767.4	1813.56	14138.5	7747.53	29139.7	24699.8	9268.51	3093.12	1864.69	16258.8	35641.7	36979.2	14055.6	14927.6	Filtered	35684.9	10462.2	42310.5	13138.9	8987.84	791.146	893.392
P06318;P06319	Ig lambda chain V-VI region WLT;Ig lambda chain V-VI region EB4	Filtered	13871.4	4507.54	21071.3	92646.4	55902.9	38969.4	43507.1	41736	38541.9	21284.9	10053.5	47203.4	30620.3	237756	150354	65477.7	39749.1	10319.1	57001.9	168795	295730	1973.91	9565.75	22266.5	104764	73025.4	269535	90310.4	59182.7	14888.3	39101.8
P06331	Ig heavy chain V-II region ARH-77	152297	250143	108632	584119	468391	469727	467594	413934	145540	209953	249503	350699	362898	184643	1.0634e+06	1.03093e+06	440409	336909	235105	1.27958e+06	1.10147e+06	1.60482e+06	528972	514228	273571	1.00561e+06	897464	1.85292e+06	871810	477484	189782	167350
P06396	Gelsolin	750810	744494	564839	948603	813758	785013	1.2373e+06	1.45159e+06	1.34818e+06	1.20765e+06	1102196	1794815	1.12923e+06	943296	1.5537e+06	1297994	1.31246e+06	1.47713e+06	1.05748e+06	2.43556e+06	1.79894e+06	3048197	777136	835688	1.02852e+06	1.9852e+06	1.35214e+06	3.05463e+06	1.49489e+06	1.54712e+06	874206	1.07295e+06
P06576	ATP synthase subunit beta, mitochondrial	6024.12	7359.12	11445.6	Filtered	7617.22	7744.1	35458	29839.1	5646.82	7262.73	3835.53	8149.45	34805.6	38882	3836.09	3213.62	25380.3	31690.8	14259.5	4567.38	11459	8380.24	17561.4	19489.8	21122.3	6613.3	25697.3	16999.5	51066.7	35807.5	127697	39117.5
P06681	Complement C2	15103.4	4295.34	3340.56	7050.05	12504	19886	7392.98	8608.37	7792.19	7890.71	4429.56	2876.54	24251	24270.3	12450.8	15645.6	13406.6	5001.71	Filtered	Filtered	9206.47	14466	37442.2	22977.8	24528.9	40792	12627.2	Filtered	8916.3	5715.39	32581.5	6257.49
P06702	Protein S100-A9	280326	329189	675724	1.38042e+06	660506	554857	662915	626293	200201	443559	369517	488425	588130	449437	329026	469382	514986	627756	270671	274320	426251	485012	508932	233612	138733	288708	519770	878186	1.09582e+06	999449	444164	418414
P06703	Protein S100-A6	570380	1.23227e+06	872808	1.81984e+06	796267	1.82209e+06	1.42549e+06	1799572	974334	1.36638e+06	2.1659e+06	2.54099e+06	1.39988e+06	1.32286e+06	2.82181e+06	3.49806e+06	2.55228e+06	3.52419e+06	1.60908e+06	3011131	2.98821e+06	3.93622e+06	2118838	1.20216e+06	1.37874e+06	2.4681e+06	1.64916e+06	3.62958e+06	1.78676e+06	1.26894e+06	1.49233e+06	2601590
P06727	Apolipoprotein A-IV	81333.9	59675.2	31225.4	43187.8	23889.8	42277.6	39895.5	68393.2	92691.9	110061	31749.5	18360	36968.1	34099.6	14377.2	18683.8	87748.5	24319.2	7488.8	17731.7	67728	148148	100469	57289.8	217775	667150	81184.7	118041	52666.1	26750.8	42520.2	49470
P06731	Carcinoembryonic antigen-related cell adhesion molecule 5	Filtered	Filtered	1642.41	Filtered	Filtered	Filtered	Filtered	Filtered	Filtered	Filtered	Filtered	Filtered	Filtered	Filtered	Filtered	Filtered	Filtered	676.187	Filtered	Filtered	Filtered	Filtered	Filtered	Filtered	Filtered	Filtered	Filtered	Filtered	Filtered	3261.3	4374.59	2168.22
P06733	Alpha-enolase	625196	882635	361576	596394	554679	643952	1.63412e+06	1096342	793358	1.09687e+06	1142907	1.06769e+06	514519	539223	1.80199e+06	1.80062e+06	1.02876e+06	1.04632e+06	1.08875e+06	1.56019e+06	1.20849e+06	1.04606e+06	644820	582720	857021	1541923	887841	2.15871e+06	1.10158e+06	790595	898299	773821
P06737	Glycogen phosphorylase, liver form	19354.1	24580.3	30765.9	53544.6	19070.4	22162.8	86522.9	80785.4	28261.6	27082.8	42229.7	20674	25752.7	27077.9	68962.7	34995.5	37129	49463.8	12668.3	7461.78	53406.2	47542.2	8370.96	5129.46	33243.1	39956.6	29602.3	26771.3	39077.3	37374.8	17077.8	10598.3
P06744	Glucose-6-phosphate isomerase	63808.9	74566	43501.2	57459.9	68560.3	54258.9	103666	115987	55902.7	77392.8	86783.1	119742	72794.6	179308	122848	151394	137815	142073	118510	138254	123086	98878.7	63192.9	64687.8	75880	50774.2	95479.9	105967	107955	78197.4	87604.7	102087
P06748	Nucleophosmin	7972.02	10356	4797.17	987.927	9700.74	2625.78	Filtered	Filtered	5064.43	4400.24	5022.46	5146	2568.75	2265.79	Filtered	Filtered	3908.48	1354.75	7576.62	8825.47	4030.53	Filtered	4804.72	6843.37	22811.9	22866.9	6528.03	Filtered	5347.56	4192.36	2873.18	4575.79
P06753	Tropomyosin alpha-3 chain	66607.1	96953.3	76132.6	107580	90872.2	68331.9	124722	132116	107039	74007	111933	124540	126523	109573	94360.9	104540	116030	134067	152073	143042	123437	125212	68994.6	105989	139182	316388	116210	159025	120558	165021	83243	102399
P06865	Beta-hexosaminidase subunit alpha	5862.6	9578.87	4025.86	9867.2	12908.4	7196.16	13591.6	14791	6577.56	8610.22	12790	6706.72	10142.4	7003.59	36979	48284.9	18777.1	11316.9	12052.9	41944.2	23264.1	58914.6	11789.4	12317.2	28072	100390	19485.6	97171.2	28727.5	19126.2	12559.6	15971.2
P06889	Ig lambda chain V-IV region MOL	4607.5	2584.87	Filtered	Filtered	26164.5	32176.1	Filtered	20996.8	8136.53	Filtered	Filtered	4446.61	25087.8	17081.4	56819.7	5790.23	Filtered	Filtered	Filtered	Filtered	Filtered	Filtered	30148.6	24334.1	Filtered	Filtered	28294.6	Filtered	11681.9	Filtered	4901.33	Filtered
P07108	Acyl-CoA-binding protein	36147.1	47950.6	31081.3	48914.3	36241.1	21966.9	90491.2	89006.8	26628.7	49731	38634.7	44267	23438.9	22822.7	43995.3	63278.5	32552.4	42904	47147.7	55306.7	46538.5	58193.1	20142.5	26507.8	29265.4	76544.5	42259.6	141817	44361.7	32133	34184.8	56267.6
P07195	L-lactate dehydrogenase B chain	38684.6	42730.3	50021.6	99412.2	58425.5	243962	113461	230995	185009	48711.5	65365.1	70535.2	64337.6	72075.5	123583	84760.3	72038.5	85122.2	92923	192050	93716.7	414552	84781.8	95757.3	58713.3	5078217	99108.4	281762	69242	89659	100217	80509.7
P07203	Glutathione peroxidase 1	40935.1	57944.9	37387.2	70198.7	53996.3	31016.3	58848	56769.4	43761.3	43335.4	49029.8	71686.6	38471.9	36487.4	92368	88135.7	38804.1	72011.2	76426.5	83803.3	72658.9	67752.2	18024.8	17437.7	33497.3	34906.9	52697.7	78753.2	58325.4	43239.7	28412.7	59547.6
P07225	Vitamin K-dependent protein S	11915.6	8063.03	9441.42	Filtered	11027.2	10012.9	Filtered	Filtered	8708.75	56338.7	Filtered	2065.79	3084.28	29094.4	7058	Filtered	2977.83	Filtered	Filtered	Filtered	6118.91	Filtered	7830.54	5148.3	15273.9	57575	13848	Filtered	7686.7	889.68	6420.86	4472.38
P07237	Protein disulfide-isomerase	32663	38059.1	40955.5	29718.5	51340.1	40987.3	79789.9	81570	36771	45765.2	44184.3	29053.7	52610.1	59165.6	67864.4	65154.9	72993.3	68686.4	41781.9	76918.8	57324.1	77169.5	68600.8	79988.5	52008.2	144105	66328.9	172127	120510	109681	95654	54063.8
P07305	Histone H1.0	Filtered	49398.3	7233.64	Filtered	Filtered	Filtered	Filtered	Filtered	Filtered	Filtered	9625.95	Filtered	Filtered	Filtered	Filtered	Filtered	25294.8	Filtered	Filtered	Filtered	Filtered	Filtered	Filtered	Filtered	12667.9	Filtered	Filtered	Filtered	Filtered	Filtered	3251.67	Filtered
P07339	Cathepsin D	115771	190750	101506	181279	125139	115514	111519	168679	106350	77242.5	115833	83967.7	119299	113047	256496	315533	322025	237772	222392	425713	243091	296396	95900.9	145135	269824	590019	222559	892094	319494	167223	295626	180877
P07355	Annexin A2	817370	585220	648391	294760	828230	806144	1.27029e+06	1.25737e+06	1.08857e+06	940101	703793	1.17386e+06	443784	496027	1.08736e+06	962748	1170822	1.18852e+06	1.05533e+06	955146	1.12122e+06	1.42353e+06	946610	681144	926447	1084436	689265	795208	811347	719732	404188	463506
P07357	Complement component C8 alpha chain	15256.3	10222.9	3793.03	6132.83	14530.4	19778.8	5036.04	11124.4	11707.3	11118.7	7044.03	3860.46	7123.54	8422.76	4864.18	5636.21	13760.9	6056.9	1621.61	Filtered	10573.5	10666.8	20513.3	18066.9	27725.2	73679.8	12227.8	7111.18	7673.77	4652.32	17161.1	7779.8
P07358	Complement component C8 beta chain	5341.19	3829.02	1306.43	2633.87	5710.42	5264.13	4118.48	Filtered	3792.18	4328.63	3103.72	1460.24	4770.25	2708.61	17936.6	3461.51	5893.61	4292.7	1613.84	35515.5	21202.4	18717.8	8186.83	12634.9	9582.57	30672.1	8398.61	Filtered	6731.3	2081.75	4322.32	4398.84
P07360	Complement component C8 gamma chain	31430.9	13322.4	4539.72	13816.7	15556.4	31046	8850.67	17103.7	12935.7	6475.67	17742.5	5325.27	7685.86	7639.96	9841.91	15056.9	17892.2	7455.31	1490.43	11017.6	10927.8	15407.7	38521.6	24692.3	51076.6	176363	17202.4	Filtered	13288.5	4047.15	20643.7	7316.98
P07384	Calpain-1 catalytic subunit	151595	230951	205335	266444	201100	197374	252674	234855	229297	219587	253466	257577	204604	210719	284790	387984	239514	291231	326789	271636	334470	361885	184493	193910	192133	148300	267633	311086	247964	257439	248275	357959
P07437	Tubulin beta chain	20367.6	22367.3	12130.2	17052.9	21588	31960.7	19872.2	24968.6	14464.3	32180.9	38310.8	19911.8	38500.9	24694.4	32386	36138.7	31021.4	15767.2	24485.6	36949.4	19848.5	Filtered	15727.5	47040.8	38662.8	Filtered	50163	26768.6	27456.4	34563.1	24827.9	40469.9
P07476	Involucrin	Filtered	Filtered	8545.61	17928.4	2806.25	2381.1	5571.63	9851.99	85.5372	Filtered	3703.09	Filtered	Filtered	Filtered	Filtered	Filtered	Filtered	878.082	2133.39	Filtered	Filtered	Filtered	2347.74	4703.03	228.709	Filtered	Filtered	Filtered	13831.7	20749.9	2042.89	3433.05
P07602	Proactivator polypeptide	104951	137900	126679	289266	199027	170402	259199	304016	95581.7	126358	300465	164650	83455.6	143879	402974	473024	246346	211713	250187	784897	457069	610373	169008	220075	481366	1240279	345610	1755476	383714	287936	310643	332863
P07686	Beta-hexosaminidase subunit beta	4560.61	5436.27	4166.13	12772.2	7165.07	5725.53	8975.91	12659.5	9873.1	8928.53	14111.7	4995.73	6410.11	5468.73	16066.5	15891.2	16151.6	10040.3	9912.76	45134.5	13739.7	29378.6	7841.87	9202.06	19183.2	67139	22232.8	124153	15746.9	10912.9	8982.45	14301.9
P07711	Cathepsin L1	7012.59	11491.2	7661.61	43232.6	12515.7	14650	35072.3	24546.5	13256.6	12964.5	21922.5	10335.8	19718.3	12732.5	38996.4	30535.4	18366	14364.7	13692.3	61713.2	20888.3	16351.2	8186.04	8337.85	20473.9	74299	26902.4	238844	37295.3	23231.4	11712.7	19043.2
P07737	Profilin-1	255886	292826	181451	300673	314812	313428	549944	717484	256016	360313	458617	434628	471144	394285	467462	601512	551381	567352	340403	462658	420758	436997	369774	504787	324260	421465	504609	545039	441407	169428	415476	510469
P07741	Adenine phosphoribosyltransferase	44164.2	72535.9	39666.5	22308.9	57322.9	50377.1	120616	98539.9	55376.6	66132.3	54172.5	53935.2	25773.6	59945.3	96961.1	97973.1	60077.7	52183	69118.2	71101.5	65325.2	114196	69689.9	59074	40810.6	136531	56100.2	45285.5	67720.2	45480.8	78423.3	82988.3
P07814	Bifunctional glutamate/proline--tRNA ligase	6038.82	7047.19	5320.75	7121.24	6387.74	7613.58	2221.48	Filtered	8075.81	7329.24	14504.7	9019.34	9764.31	4814.03	11660.7	14257.9	6433.59	4866.37	8808.82	12678.3	25382.5	Filtered	6645.32	5423.84	13138.2	11358.1	7953.21	Filtered	10544	4636.24	Filtered	3681.04
P07858	Cathepsin B	87369.7	119568	121585	314959	177975	191414	215416	238284	89044.5	124179	317723	146867	191120	135099	474406	548169	161667	138240	255018	986804	402150	500568	164957	169598	325876	914940	286162	1.5998e+06	335744	281175	102464	227080
P07900	Heat shock protein HSP 90-alpha	261547	335653	305399	367832	299535	313474	313924	355851	290465	305865	342838	342133	356663	371451	399740	383460	367281	353478	311425	425111	385840	322328	362650	420089	267900	209665	324880	591498	340013	313126	338855	365972
P07902	Galactose-1-phosphate uridylyltransferase	7999.32	9256.1	5270.63	7339.17	9149.34	4800.9	13829.7	14426.3	6834.54	8710.76	6782.34	11301.1	10487.1	9359.48	18110.5	15282.8	7375.78	8064.83	5481.21	6977.35	7354.22	Filtered	6384.58	4754.05	Filtered	Filtered	4931.63	6853.56	8934.88	6383.77	7044.58	14108.3
P07910	Heterogeneous nuclear ribonucleoproteins C1/C2	30783.4	22842.3	19167.2	8167.7	24465.2	17137	18257.2	18999.7	17560.2	25516.3	16770.1	14008.1	21313.4	23664.3	Filtered	Filtered	18946.5	26713.3	34965.2	43894.4	32435.6	Filtered	33862.4	40470.5	70506.3	Filtered	21985.9	Filtered	22274.1	30852.6	27621.6	6887.11
P07954	Fumarate hydratase, mitochondrial	7255.7	6833.99	9998.61	6620.95	11052.8	4996.04	18854.7	22327.1	9296.25	11633.8	10542.6	9551.36	12741	13217.9	6173.99	4527.94	14700.8	14649.3	9994.3	Filtered	10774.9	9199.07	7567.29	10493.4	15145.6	Filtered	9062.69	Filtered	22132.3	23715.3	22018.5	10299.9
P07996	Thrombospondin-1	5394.04	15715.4	4450.98	35818.4	36464	33357	5287.29	10542.4	3472.75	10953.2	15071.6	4908.16	10964	10632.7	42157.5	40851.7	26741.6	9801.42	1932.63	8891.07	38360.7	36479.3	7937.05	6416.99	19647.8	118283	17588.4	124526	13697.9	28712.5	4831.49	1528.98
P08107	Heat shock 70 kDa protein 1A/1B	587954	684523	464331	607801	596857	504067	1.06203e+06	1161277	573924	624099	674366	682126	480199	403576	1.1183e+06	1002684	715553	886231	742524	959043	874353	908932	484578	319903	649422	700009	606694	849423	680247	554684	595012	536392
P08133	Annexin A6	38189	11122.6	13874.9	14256.5	12665	8195.48	31548.8	40067.3	25329.4	7931.58	16791.5	44769.3	2828.54	5565.97	4835.5	3240.19	8763.54	12307.3	Filtered	Filtered	50836.2	738563	21640.2	18939.6	5053.76	Filtered	13811.8	76698.7	13307	8802.96	7921.68	33404.3
P08134	Rho-related GTP-binding protein RhoC	Filtered	Filtered	1282.83	Filtered	Filtered	Filtered	Filtered	Filtered	Filtered	Filtered	7448.56	8940.58	8405.91	7689.9	Filtered	Filtered	Filtered	9253.99	6696.84	Filtered	Filtered	Filtered	Filtered	4701.36	Filtered	Filtered	9415.18	Filtered	Filtered	8124.93	Filtered	4495.83
P08174	Complement decay-accelerating factor	3123.79	13030.9	9386.69	26642.8	6848.05	Filtered	Filtered	Filtered	8754.81	7053.45	25892.5	5454.93	9329.77	Filtered	13043.3	Filtered	14406.1	11887.4	2906.36	21181.3	7736.61	Filtered	Filtered	Filtered	Filtered	Filtered	Filtered	113622	1856.48	14542	Filtered	8005.52
P08185	Corticosteroid-binding globulin	48538.7	32735.1	12263.5	25035.9	42045.9	73481.5	36738.4	48218.7	46770	44271.3	30203.7	21786.7	29227.6	48383.6	33282.5	44351.3	36548.8	16522.4	14690.3	22549.5	39031.2	Filtered	114808	74404.1	88481.9	Filtered	54339.6	Filtered	37047.7	19315.6	77279.7	21669.4
P08237	6-phosphofructokinase, muscle type	2809.08	2182.45	1006.73	Filtered	Filtered	Filtered	Filtered	Filtered	Filtered	Filtered	Filtered	2754.48	2957.42	1373.13	Filtered	Filtered	Filtered	Filtered	4018.19	Filtered	Filtered	Filtered	1724.55	Filtered	Filtered	Filtered	Filtered	Filtered	Filtered	Filtered	Filtered	399.848
P08238	Heat shock protein HSP 90-beta	51069.7	68425.3	53073.5	73847	78571.1	67747	78388.9	94080.3	57234.1	70694.6	120644	81514.9	92953	94473.8	97369.9	103128	95070.2	100900	80270	114002	101832	108132	98489.8	130321	63584.5	53433.2	109228	160801	85235.1	98419.6	81820.3	85038.4
P08246	Neutrophil elastase	9909.34	11361.5	5577.86	Filtered	95516.6	61186.4	Filtered	Filtered	10246.9	Filtered	Filtered	Filtered	36559.5	Filtered	Filtered	Filtered	372433	339109	Filtered	Filtered	Filtered	Filtered	48327.6	Filtered	Filtered	Filtered	Filtered	Filtered	Filtered	Filtered	Filtered	Filtered
P08254	Stromelysin-1	Filtered	Filtered	Filtered	Filtered	Filtered	Filtered	Filtered	Filtered	Filtered	Filtered	Filtered	Filtered	Filtered	Filtered	Filtered	Filtered	9368.07	Filtered	Filtered	Filtered	Filtered	Filtered	Filtered	Filtered	Filtered	127634	Filtered	Filtered	Filtered	Filtered	Filtered	Filtered
P08263;P09210	Glutathione S-transferase A1;Glutathione S-transferase A2	309435	282279	76937.2	76113.4	151540	155686	273244	309483	131406	330766	242799	140444	211162	137105	360899	551754	174642	89737.9	100005	410241	110913	77346.1	90778.4	73751.8	160217	Filtered	59485.8	61635.8	334730	231323	147341	239314
P08294	Extracellular superoxide dismutase [Cu-Zn]	28946.4	23634.5	16384	15182	35203.5	34565.8	26381.8	22749.8	32612.6	24765.8	11372.9	19852.7	26898.6	19136.2	45986.2	28481.7	24608.2	19116.5	18628.3	16908	24723.2	47690.2	17419.5	13982.1	32866.3	36804.6	33820.2	25606.6	29843.3	21129.4	17823.6	10509.6
P08311	Cathepsin G	Filtered	Filtered	Filtered	Filtered	18205.2	17511	Filtered	Filtered	3284.28	3067.77	4979.05	Filtered	3419.6	Filtered	Filtered	Filtered	17144.5	6910.1	Filtered	Filtered	Filtered	Filtered	Filtered	Filtered	Filtered	Filtered	Filtered	Filtered	11419.2	4034.12	Filtered	Filtered
P08559	Pyruvate dehydrogenase E1 component subunit alpha, somatic form, mitochondrial	Filtered	Filtered	Filtered	Filtered	Filtered	Filtered	Filtered	Filtered	Filtered	Filtered	Filtered	Filtered	4687.09	4844.68	Filtered	Filtered	4794.24	7023.86	4180.65	Filtered	Filtered	Filtered	7836.43	6431.07	Filtered	Filtered	Filtered	Filtered	Filtered	13190.5	12469	Filtered
P08571	Monocyte differentiation antigen CD14	22964.6	27007.2	13767.8	59272.6	32327.7	26500.9	65216.1	121803	10400.5	24019.8	28784.3	31406	53041.4	28584.1	66766.6	96768.4	56631.6	49298.4	24172.9	110452	80571.9	290732	41614.8	35739.2	36850.8	469997	77660.1	242509	114630	50730	21294.9	38456.2
P08582	Melanotransferrin	3057.4	4763.05	1807.57	10002	6836.21	5715.65	Filtered	8241.38	2959.2	4635.52	2947.26	3677.63	11869.1	3767.45	48174.5	40811.7	7789.08	7439.33	5233.34	13530.2	30649.6	46739.1	31071.5	2041.04	3505.41	Filtered	14723.8	28231.3	19330.9	11428.2	8029.25	7422.41
P08603	Complement factor H	112748	72808.6	23196.5	34467.4	117893	188510	75630.8	72167	90040.3	93500.9	47166.5	33296.4	63918.8	67591.8	78627.1	106972	84413.7	27935.7	25042.2	81213	82011.5	133406	176103	129397	204195	834017	109101	154667	87756.7	60028.8	116478	59695.3
P08670	Vimentin	2777.55	5472.93	7633.9	Filtered	23755.7	15244.7	3476.48	5630.04	7945.29	15163.3	31701.9	4743.62	69203.3	49391.5	25211.8	11395.5	62422	52797.3	7706.64	19779	3950.13	Filtered	30927.8	66457.2	28426.6	Filtered	32461.9	9332670	22660.3	40319.1	6963.41	13606.9
P08697	Alpha-2-antiplasmin	26560.4	16521.7	6081.4	6352.87	19072.8	26572.1	15331.2	17787.8	18697.9	26846.5	12223.1	9458.57	14612.9	11018.6	31662.5	19402.7	24396.7	11599.4	6844.77	16001.7	28171.2	68723.2	47892.4	33760.7	43204.9	155741	30617.5	25583	27760.3	17265.4	17980.3	9573.16
P08708;P0CW22	40S ribosomal protein S17;40S ribosomal protein S17-like	Filtered	Filtered	4243.53	Filtered	Filtered	Filtered	Filtered	Filtered	2928.34	4034.29	Filtered	1657.59	Filtered	1679.3	Filtered	Filtered	Filtered	534.732	5094.08	Filtered	4633.88	Filtered	833.745	721.949	1564.37	Filtered	Filtered	Filtered	Filtered	2507.79	Filtered	Filtered
P08727	Keratin, type I cytoskeletal 19	432019	162920	87550.8	62680.9	207109	211799	226186	201487	204964	327266	174899	97112.4	62264.4	142773	83262.6	70340.6	423362	159469	77740.9	604128	367661	424938	114082	87044.1	780606	996011	220806	248646	161622	129844	104470	80517.3
P08729	Keratin, type II cytoskeletal 7	145837	43232.4	18974.3	12475.4	64346.2	44852.3	22484.7	51622.2	66931.5	85599.4	28765.1	20206.4	6290.67	14276.4	15373.2	8643.11	65799.2	36313.8	7334.33	145471	39401.3	54731.5	16810.5	16057.2	94797.4	169928	41216.2	50266.6	28450	16594.6	22499.5	6744.14
P08754	Guanine nucleotide-binding protein G(k) subunit alpha	10351.5	16254.7	7786.37	Filtered	11909.5	17290.2	11378.5	Filtered	6522.84	6424.27	Filtered	5580.91	12175.2	8644.79	Filtered	Filtered	12295.6	25647.5	11348.9	Filtered	Filtered	Filtered	4253.43	2617.86	18324.7	Filtered	16503.4	Filtered	21793.4	10244.1	9439.59	Filtered
P08758	Annexin A5	416911	393640	175514	300170	422177	433521	776275	862885	362328	568660	605253	529530	392176	324239	822416	889509	777091	439781	271968	612947	504977	556362	289367	285181	338506	473149	357871	604628	618725	345277	379232	426379
P08865	40S ribosomal protein SA	33370.5	30897	32833.6	14196.9	34324.4	26403.5	28685	31560	32845.4	39003.3	35417.1	35833.5	43717.5	31392	27529.2	25713.7	35539.8	43216.8	56534.6	55811.2	33221.8	28534	44632.1	44478.9	85503.1	91253.8	46107.8	23753	22924.2	46761	42378.4	33483.5
P09211	Glutathione S-transferase P	514691	837922	642717	1.14809e+06	1.09695e+06	821738	1.43466e+06	1.47524e+06	754788	861845	721371	1.29728e+06	716186	650781	1.71354e+06	1.48327e+06	988810	999765	977325	1368061	1.1044e+06	1133572	637607	358839	546837	948253	634306	1.19538e+06	1.17886e+06	724608	1.25602e+06	1.20131e+06
P09228	Cystatin-SA	4236.29	13574.6	17334.8	48782.9	29269.8	7452.52	136447	72613.4	16249.1	15254.9	13486.3	19460.3	Filtered	4476.82	468881	59377.3	59364.7	18303.1	59330.7	55895.4	370741	867314	124898	Filtered	57297.8	188963	37652.1	398809	45234.5	6732.36	Filtered	23975.1
P09237	Matrilysin	18287.9	29060.4	Filtered	12596.5	15711.4	7173.92	Filtered	Filtered	Filtered	26665.5	Filtered	Filtered	68134.8	58194	279977	215732	23311.9	10922.2	Filtered	Filtered	46595.4	Filtered	13039	20747.8	Filtered	Filtered	17983.8	Filtered	13467	50154.5	Filtered	Filtered
P09238	Stromelysin-2	Filtered	Filtered	Filtered	2880.97	2963.58	3352.98	2200.9	Filtered	Filtered	Filtered	2792.33	Filtered	692.256	215.323	Filtered	Filtered	10060.2	7151.3	Filtered	Filtered	Filtered	Filtered	Filtered	Filtered	6588.95	175771	Filtered	Filtered	6675.88	3571.51	389.982	Filtered
P09382	Galectin-1	1840.44	Filtered	2025.91	Filtered	52603.3	2947.74	Filtered	Filtered	1293.38	5984.85	Filtered	Filtered	22224.7	29723	Filtered	Filtered	Filtered	1114.3	33828.5	Filtered	Filtered	Filtered	10848.2	19734.5	4506.08	Filtered	23944	Filtered	Filtered	Filtered	2678.6	159262
P09417	Dihydropteridine reductase	13599.8	17071.9	6760.75	9306.48	10984.3	10908.9	19044.3	16098.2	12633.1	15812.1	11182.1	24871.2	10154.2	12766.4	31021.2	32732.8	15257.5	10569.7	13194	21199.3	16819.4	41181	11935.3	12682.8	14971.6	Filtered	25805.1	40199.3	13924.1	12735	16654.6	20685.3
P09429	High mobility group protein B1	17145.4	19622.4	13715.6	6150.48	24083.4	27133.9	6214.1	9176.09	23016.2	24679	20378.3	18831.9	25240	29978.3	6098.12	Filtered	37744.1	32330	40630.3	42422.6	10959.3	Filtered	31699.2	29796.4	38745.2	Filtered	37363.7	Filtered	20985	24097	25956.7	12271.9
P09467	Fructose-1,6-bisphosphatase 1	114854	142269	84998.1	185177	128092	95831.5	410868	324432	100370	129516	119825	209215	92103	97497.6	112832	108729	165694	155743	109166	135287	102684	115947	63813	62220.1	49844	68020.6	62736.7	111258	102993	82247	134303	186453
P09497	Clathrin light chain B	7593.61	9178.95	15434.3	7531.34	5553.03	4383.19	5619.83	13813.7	10844.4	12697.9	7023.08	8107.92	8166.14	4077.53	Filtered	Filtered	8688.27	11446.5	12432.8	Filtered	Filtered	Filtered	3217.32	8137.51	4918.63	Filtered	Filtered	Filtered	5420.22	6780.46	6194.19	5501.93
P09525	Annexin A4	546838	591228	291871	1.28481e+06	394504	234762	753570	953462	495775	447847	1.53628e+06	1219873	654998	606013	2.05308e+06	1.66672e+06	1829293	1.70258e+06	112066	1.42366e+06	1.43581e+06	1.86693e+06	543554	573763	973712	1.17502e+06	60841.4	1.75017e+06	881741	898160	709311	1.22372e+06
P09622	Dihydrolipoyl dehydrogenase, mitochondrial	2521.53	3981.69	4568.15	Filtered	3728.29	2010.92	5226.99	7059.72	2538.62	5166.88	987.979	1637.7	5953.49	5618.17	Filtered	Filtered	2556.77	2669.98	4090.39	Filtered	1616.77	Filtered	1177.34	3218.25	4333.75	Filtered	4515.18	Filtered	3258.52	3810.36	10860.9	2737.72
P09651	Heterogeneous nuclear ribonucleoprotein A1	8127.09	9123.36	8427.79	7872.36	7618.5	31229.3	29118	48869	22928.2	5709.72	6976.72	5621.32	5011.83	6337.61	28827.2	Filtered	8936.54	13088.4	27533.2	21585.4	32845.1	44259	7694.15	10962.5	19035.2	91897	13832.6	Filtered	51486.3	13320.6	11029.2	5565.02
P09668	Pro-cathepsin H	2691.54	3599.76	2967.06	9911.3	7506.89	6214.67	3871.11	6528.17	3394.89	4003.16	10666.7	3208.67	1724.77	2508.69	Filtered	Filtered	3608.2	3149.47	2072.33	Filtered	Filtered	Filtered	4784.52	Filtered	10665.9	Filtered	Filtered	130277	4188.54	3311.12	5144.23	8528.09
P09758	Tumor-associated calcium signal transducer 2	Filtered	Filtered	7565.06	14197.5	Filtered	5109.97	Filtered	74140.1	5597.73	2058.06	Filtered	6272.91	Filtered	6607.58	Filtered	Filtered	Filtered	Filtered	8837.65	Filtered	Filtered	Filtered	Filtered	Filtered	9012.87	Filtered	Filtered	63035.9	Filtered	8458.29	4914.67	Filtered
P09871	Complement C1s subcomponent	11211.7	3435.18	2633.36	Filtered	11540.7	20482.8	7644.45	9667.79	12853.8	10499.4	3914.8	5627.28	11017.3	13689.6	3898.89	11896.9	7414.76	Filtered	Filtered	Filtered	Filtered	Filtered	22526.4	23961.7	17227.4	39232.9	Filtered	Filtered	2891.9	Filtered	17857.3	6472.98
P09914	Interferon-induced protein with tetratricopeptide repeats 1	14658	8781.21	1237.76	21227.8	4777.62	Filtered	47654	17863.2	6468.65	9201.04	9508.77	4894.87	13274.1	16301.5	131094	250215	5087.36	30450.5	Filtered	Filtered	314562	228367	11381.6	10329.7	226268	305515	15421.2	Filtered	101048	100861	12822.6	19044.1
P09960	Leukotriene A-4 hydrolase	24446.9	29490.8	18774.4	31053.7	27425.8	25857.8	38319.1	37715.3	21821.7	32819.7	49181.1	36397.9	30501.3	22327	37564.5	44358	42115.1	41385.2	24058	42661.2	30212.5	31390.8	18648.5	20459.6	19051.3	28028.5	25434.8	15895.6	36744.8	25657.4	17812.9	26741
P09972	Fructose-bisphosphate aldolase C	31291	40547.7	40581	133977	29964.6	24780.8	104948	55272.5	42091.7	41779.9	36466.5	32964.4	38076.4	26830.2	68809.9	78804.1	43910.8	37193.2	38859.8	88308.6	100725	107642	27706.8	28529.4	23705.9	53971.4	57541.4	112054	108382	80638	45346.6	47028.8
P0C0L4	Complement C4-A	85873.4	51378.4	16749.3	21348.9	105578	210752	106181	107588	108144	99023.4	58007.4	45625	124530	115374	387766	472634	93367.9	42824.8	16600.8	39228.8	72162.1	129405	298651	248857	230666	773333	131665	129182	103837	34883.7	144098	52118.6
P0C0L5	Complement C4-B	19906.8	Filtered	881.184	Filtered	25828.9	50329.6	47756.1	98521.1	27296.7	21536.1	Filtered	3519.18	43117.3	37427.3	156960	155966	Filtered	Filtered	Filtered	Filtered	8135.51	Filtered	139516	95112.7	17847	Filtered	9226.62	Filtered	21591.7	13448.4	48214.2	10862.5
P0CG05	Ig lambda-2 chain C regions	3.15016e+06	4.78922e+06	3156474	12365991	7835798	8138813	13603031	15122757	4.51577e+06	6.94842e+06	5187241	4619365	10438869	6.11997e+06	43682252	35316916	11347485	8.22401e+06	5244722	23926018	26635874	44101060	10288207	8974748	8311584	24326430	17637626	43030944	21603398	9711517	6507360	8476947
P0DJI8	Serum amyloid A-1 protein	8455.95	12041.1	1849.73	15463.4	31948.9	34410.8	11546.6	14429.3	8100.53	8913.83	Filtered	Filtered	10313.4	3516.21	Filtered	Filtered	8901.59	1365.45	Filtered	Filtered	Filtered	39392.6	9727.83	9329.4	Filtered	Filtered	9191.72	70196.5	5652.13	7009.29	1672.05	Filtered
P10153	Non-secretory ribonuclease	Filtered	Filtered	Filtered	Filtered	Filtered	7021.6	Filtered	Filtered	Filtered	Filtered	4340.69	Filtered	Filtered	Filtered	Filtered	Filtered	18552.2	11722.6	Filtered	Filtered	Filtered	Filtered	12909.4	13659.7	Filtered	Filtered	Filtered	Filtered	6745.02	Filtered	Filtered	Filtered
P10155	60 kDa SS-A/Ro ribonucleoprotein	2892.3	5116.95	2964.21	Filtered	Filtered	3028.57	Filtered	Filtered	Filtered	706.323	Filtered	1429.42	1756.1	Filtered	Filtered	Filtered	2667.2	4384.14	3641.48	Filtered	Filtered	Filtered	1828.17	3386.61	1386.43	Filtered	Filtered	Filtered	Filtered	4417.34	1692.8	Filtered
P10253	Lysosomal alpha-glucosidase	7432.86	8339.46	8142.85	10245.9	2819.68	7548.06	Filtered	781.468	7412.97	11791.5	5739	3325.06	11456.3	9106.99	41063.2	26882	10709.6	8349.65	11244.4	14183	3962.95	Filtered	10691.3	11067.2	28477.5	Filtered	10772.8	16053.4	16435.9	11114.5	17918.9	7403.23
P10412;P16402;P16403	Histone H1.4;Histone H1.3;Histone H1.2	22669.4	55773	17490.3	Filtered	33010.6	38618.3	39289.7	37836.4	8258.3	27818.6	49445.2	12485	16472	21733	8968.12	21503.8	63474.4	51816.8	9224.88	Filtered	20501.3	33668	30330.8	21506.4	58067.1	123704	35459.4	Filtered	34014.5	20955.4	23103.7	22095.4
P10599	Thioredoxin	98226.7	221151	286827	633918	118544	76909.9	337745	383729	100348	99732.9	162123	205335	183980	205960	272697	296767	330224	477544	509222	277991	419467	416512	197304	167963	107237	205735	218053	507969	364083	445671	487080	425106
P10643	Complement component C7	1581.25	1550.36	1771.94	4321.67	10915.3	19614.7	9031.87	15137.6	8699.32	10603.2	5234.83	2516.85	8420.78	12617.1	7213.2	7066.82	7639.57	5985.06	1222.17	3861.65	8015.12	10644.7	14446.8	12909.4	23281.6	79184.8	16105.1	10355.7	5987.23	3249.16	16814.7	6383.69
P10768	S-formylglutathione hydrolase	6645.67	8978.49	3994.16	6773.66	6388.3	10056.2	9853	11540.1	6110.62	5324.01	9460	11303.8	7674.94	7392.43	25125	16613.4	11682.1	3674.99	3990.51	11534.6	5885.44	Filtered	4578.77	7044.25	1749.9	Filtered	12295.5	Filtered	6660.2	6340.47	2945.5	11318.5
P10809	60 kDa heat shock protein, mitochondrial	5709.11	6984.95	3147.19	Filtered	2488.89	1775.26	21964.5	8570.51	1814.39	3687.39	1215.77	43280.6	5388.27	7256.35	4283.88	5618.69	91917.1	7462.85	4755.75	11529.7	13567.6	11892.8	12274.4	10637.2	9714.89	Filtered	15223	Filtered	22968.3	10870	11990.7	601477
P10909	Clusterin	1.34342e+06	1.813e+06	435476	2968969	2247308	2106775	3.18367e+06	4197761	788664	1.34331e+06	2210587	936794	2233477	1.38457e+06	7.33375e+06	11436848	3.11673e+06	1.79367e+06	2.24031e+06	6307067	3.00882e+06	4.75992e+06	1404821	1.51919e+06	2879379	13978792	3.8021e+06	20095350	6.48644e+06	3730941	1172494	2.41096e+06
P10915	Hyaluronan and proteoglycan link protein 1	11345.6	24807.9	1905.28	2587.91	9479.52	6888.36	17850.1	Filtered	5068.93	Filtered	9455.56	10433.7	10171.6	15218.4	Filtered	Filtered	12961.7	17002.2	8438.79	Filtered	Filtered	Filtered	12065.3	5242.43	22344.3	Filtered	8261.46	Filtered	20522.9	4882.5	14180.1	13923.8
P11021	78 kDa glucose-regulated protein	41955	31913.5	30048.3	26042.8	43612.9	28307.4	92064.5	77139	27375.7	41885.6	44527.4	29237.3	48553.7	52632.2	61608.1	56150.4	58173.9	57979	29680.2	70406.9	43439.1	50927.1	44630.2	56836.4	51230	113223	54532.5	170696	90503.6	76303.9	76931.9	58533.8
P11142	Heat shock cognate 71 kDa protein	237530	206515	188466	352237	210917	278339	314367	336991	193926	188827	275003	211912	230440	278772	292927	212595	288544	312420	234807	312903	353997	252976	255080	260379	225497	231985	257691	299948	302261	284490	286850	235020
P11172	Uridine 5'-monophosphate synthase	3629.54	5355.18	5190.38	8671.12	2633.24	3029.08	5084.31	9737.66	4761.71	4662.49	5777.52	5167.49	3946.04	4842.41	10476	Filtered	3352.6	4149.83	3937.42	Filtered	Filtered	Filtered	3064.41	2997.62	Filtered	Filtered	8784.96	Filtered	Filtered	2843.06	3839.68	2529.45
P11177	Pyruvate dehydrogenase E1 component subunit beta, mitochondrial	Filtered	Filtered	1136.6	Filtered	Filtered	2330.08	Filtered	Filtered	Filtered	Filtered	Filtered	Filtered	1832.12	2879.61	Filtered	Filtered	2411	Filtered	Filtered	Filtered	Filtered	Filtered	Filtered	Filtered	5381.54	Filtered	Filtered	Filtered	Filtered	8756.8	6773.85	Filtered
P11216	Glycogen phosphorylase, brain form	59120.2	63452.2	78962.4	91344.6	47354.9	49076.8	146123	129706	63257	72678.6	104548	70850.3	79856.4	76692.3	115114	126760	102668	118262	47242.5	2.09349e+06	102361	121148	34990.3	24488.3	73477.5	108444	86760.7	9325709	84420.3	74705.8	56232.9	40191.1
P11233	Ras-related protein Ral-A	470.194	671.6	1705.33	3175.09	Filtered	575.574	2608.49	4342.82	974.978	781.404	659.209	Filtered	Filtered	Filtered	Filtered	Filtered	Filtered	Filtered	1445.34	Filtered	3611.17	11128.7	1300.54	Filtered	1375.14	Filtered	Filtered	Filtered	Filtered	963.982	2760.52	1331.34
P11274;Q12979	Breakpoint cluster region protein;Active breakpoint cluster region-related protein	4988.82	6076.93	3730.06	3422.46	7029.58	2138.26	3906.83	4230.83	9651.67	7606.41	7982.84	9603.2	5627.73	6542.31	9666.74	Filtered	5580.75	6104.89	6384.13	9110.01	Filtered	Filtered	6082.33	5834.14	Filtered	Filtered	Filtered	Filtered	Filtered	4488.59	Filtered	7327.76
P11413	Glucose-6-phosphate 1-dehydrogenase	36685.1	43860.9	44385.4	62958.5	56957.8	47276.6	67493	65090.3	46006.3	51474.4	64930.1	48579	58887.6	51225.4	53550.2	53395.4	68506.7	82569.9	51168.9	42957.1	42164.1	23387.6	51434.7	46463	22610.2	Filtered	42727.1	48216.8	56345.6	53778.4	48616	60241
P11586	C-1-tetrahydrofolate synthase, cytoplasmic	28429.9	26719.9	19665.4	28663.5	29381.2	32502	44876.5	33074	27634.2	30744.3	28049.4	19959.3	39347.5	31216.6	28579.8	48769.3	24713.7	25306.9	25054.3	37903	24156.9	34752.6	32173.6	28698.9	24154.6	23782.3	36668.2	32577.9	29633.5	24733.4	33348.9	38100.7
P11766	Alcohol dehydrogenase class-3	79373.5	86203.6	47583.2	101181	97659.6	66233.6	141514	137086	74515.4	104650	110262	74886.3	86670.4	61219.7	206100	180191	92305.1	81937.3	80522.4	143266	120381	211406	60485	52623.1	99614.3	77874.5	111060	153329	89771.4	80936.8	61342.8	86498.4
P11908	Ribose-phosphate pyrophosphokinase 2	8222.11	6150.36	7385.83	7995.58	Filtered	Filtered	Filtered	Filtered	4784.9	7043.86	8398.36	7651	7924.7	2559.48	Filtered	Filtered	5384.63	8010.79	7529.71	Filtered	4821.27	Filtered	5471.01	7210.78	Filtered	Filtered	Filtered	Filtered	3230.79	7107.8	8291.19	6994.12
P11940	Polyadenylate-binding protein 1	16898.3	26861.6	15292.5	21127.9	16963.9	18125.4	12571.5	18071.7	20261.2	23326.6	10359.3	14662.2	19874.2	19837.2	9242.49	5404.77	21608.6	20048.1	19315.4	17265.9	18661.3	Filtered	19099.9	19415.1	38355.6	Filtered	24272.2	Filtered	21348.5	24046.4	14826.7	15890.6
P12081	Histidine--tRNA ligase, cytoplasmic	8160.54	9866.86	4692.24	11196.7	10136.4	9415.08	19544.1	15587.5	7809.32	8276.84	12189.5	13953.9	11708.6	11972	7471.67	16828.2	6436.95	11581.9	8049.96	7143.32	Filtered	Filtered	6294.42	12808.4	3828.84	Filtered	8370.2	Filtered	7878.77	7022.09	11540.7	19637.8
P12109	Collagen alpha-1(VI) chain	Filtered	700.291	1024.25	Filtered	2527.2	4168.61	8899.14	11274	1807.73	200.253	3154.19	1723.12	4882.08	3718.95	2489.13	6312.14	1457.22	1698.48	2390.14	18570.4	1016.84	3788.41	Filtered	368.732	3725.34	32845.2	1174.1	8040.48	6318.57	3664.49	Filtered	4003.58
P12259	Coagulation factor V	8528.87	8942.76	4853.58	20875.6	7303	10681.4	17961.5	19230.1	3962.56	4730.28	6485.67	3859.76	2138.27	2155.1	13816.7	17603.4	2633.35	2946.14	11891.5	23134.5	Filtered	4904.98	2818.86	5188.99	43541.6	178166	10367.4	70969.6	32051.5	24027.9	7689.3	21204.5
P12268	Inosine-5'-monophosphate dehydrogenase 2	3969.45	4524.39	3861.17	5121.9	5734.53	5025.81	Filtered	Filtered	4845.03	8330.57	4414	5946.75	4551.22	3191.54	Filtered	7008.4	6681.98	4081.96	4448.92	12479	Filtered	Filtered	2606.27	3253.32	2469.7	Filtered	Filtered	Filtered	Filtered	3525.29	1963.56	2404.26
P12273	Prolactin-inducible protein	21912162	35848440	5.09719e+06	41041320	31174356	26445930	54588400	61002500	16912116	27545988	24319934	15086926	6.74405e+06	4245404	46856304	52308344	38949552	26046992	22955316	119803824	56475836	129053440	6.63741e+06	5770885	34109664	209012336	40027500	279199136	44079420	28999808	11239485	29836764
P12277	Creatine kinase B-type	Filtered	1877.77	1348.75	5529.04	Filtered	Filtered	Filtered	Filtered	Filtered	9384.76	13057.3	2397.36	717.078	Filtered	Filtered	Filtered	3846.9	3197.55	Filtered	Filtered	Filtered	Filtered	Filtered	Filtered	Filtered	Filtered	86859.5	75939.1	Filtered	Filtered	764.811	Filtered
P12429	Annexin A3	56385.4	48924.8	35135.8	29984.2	69340.8	55347.8	117114	127158	60931.7	73773.8	35750.4	68725	44459.8	42757.7	102024	105951	131398	100598	26733.5	43892.2	50332.8	61244.7	59216.4	59396.9	31861.5	71914.7	61558	66745.6	110638	72834.6	60320.6	79512.2
P12532	Creatine kinase U-type, mitochondrial	Filtered	3757.94	7290.68	Filtered	1588.51	148.204	Filtered	Filtered	1045.7	17279.4	Filtered	Filtered	Filtered	3937.43	Filtered	Filtered	Filtered	8810.49	5403.55	Filtered	Filtered	Filtered	2936.62	5239.34	Filtered	Filtered	Filtered	Filtered	Filtered	4776.45	8451.89	2591.44
P12814	Alpha-actinin-1	32651.2	41160.7	1342.21	115904	47133.1	49156.7	276958	224479	30932.6	34009.2	12687.2	3049.4	20308.1	5104.51	39278.3	270603	21352.3	20027.5	20006.1	Filtered	190848	Filtered	7050.59	10144.6	8342.43	Filtered	36994.2	Filtered	42859.5	18119.6	22271.9	628.809
P12830	Cadherin-1	25400.8	34971.7	18343.8	54814.8	40736	35730.2	92547.1	113688	30131.5	46689.9	98121	27939.5	30417.1	23933.3	164301	190654	58746.3	53854	76004	223715	122062	254857	31251	28970.5	120996	354088	106511	567049	105574	83457.5	45992.6	28723.5
P12955	Xaa-Pro dipeptidase	16921.4	30664.7	10474.5	22249.7	11573.8	9777.92	26785	33232.3	20119.4	26459.9	8930.89	26261.7	13832.1	12104.7	9964.65	46021.8	21323.9	18054.6	16493.7	Filtered	32408.3	Filtered	7126.8	7587.97	15721.8	Filtered	9918.54	Filtered	2974.93	11749.5	14279.5	27199.5
P12956	X-ray repair cross-complementing protein 6	16171.6	16379.5	13324.5	Filtered	9211.57	13577.7	Filtered	Filtered	3603.48	8928.33	6914.35	7044.75	5193.52	6525.09	2851.08	Filtered	9043.19	9066.06	24921.9	21678.1	14408.4	11392	7085.74	13421.7	30361	17505.8	6302.03	Filtered	10657.7	14550.3	6040.73	7202.95
P13010	X-ray repair cross-complementing protein 5	10811.5	9535.34	8603.9	15761.9	6463.23	3968.33	Filtered	Filtered	5246.02	6726.05	7252.31	4924.64	6667.26	6411.9	Filtered	Filtered	2450.99	7899.75	16195.5	8886.33	Filtered	Filtered	13362.8	14142.5	28322.4	5986.82	9863.92	Filtered	6197.19	9135.46	8046.86	591.054
P13489	Ribonuclease inhibitor	132048	187210	126935	310359	168680	178845	177669	209017	181009	204506	218765	200067	143147	116518	368610	367408	160877	177107	167850	216333	221843	284378	123166	114978	151084	357275	211170	326141	215724	205987	132132	222228
P13535	Myosin-8	8092.3	Filtered	6098.17	2690.8	901.401	19852.2	Filtered	Filtered	Filtered	Filtered	32175.8	Filtered	6356.68	7397.21	Filtered	Filtered	Filtered	8272.62	7863.97	Filtered	Filtered	Filtered	2725.76	3093.73	19646.5	Filtered	7654.87	Filtered	Filtered	1823.69	Filtered	9552.38
P13639	Elongation factor 2	107272	135722	130565	143469	136456	132927	159881	139505	150488	194102	182091	181605	149351	159505	173330	174234	199280	225078	196257	225512	168972	185669	160727	199005	164104	184471	207738	259385	180301	196797	146098	180603
P13645	Keratin, type I cytoskeletal 10	16445.8	26677.6	5122.77	106386	26786.7	35017.1	47842	45577.5	28902.2	25398.9	14942.9	24360.2	7095.85	12722.2	26631.5	22844.4	22551	15957.4	8162.23	Filtered	14711.5	Filtered	94125.4	6893.05	55414.9	23541.6	36183.4	Filtered	12103	10355.4	18943.1	41774.3
P13646	Keratin, type I cytoskeletal 13	83975.7	51781.5	44983.4	47736.4	59579.1	68895.8	59889.4	69615.9	48201.2	42875.5	22050.7	30496.4	12857.9	20158.4	30302	21563.8	80724.1	47169.2	40675.2	110663	95701.9	77910.7	19321.5	18928.9	95307.7	85967.4	26210.3	33266.8	20015.1	28782.3	47775.4	74162.8
P13647	Keratin, type II cytoskeletal 5	31555.4	18447.7	4679.08	8198.52	12497	13547.3	9175.58	11455.5	6633.9	4177.69	18030	2132.81	6195.12	14983.8	11362.9	12370.7	20198.1	16581.4	13372	24461	49876.3	63141.9	10971.7	9514.6	13808.1	Filtered	13278.6	Filtered	7647.15	6837.94	21403.8	16715.4
P13667	Protein disulfide-isomerase A4	14588.3	11613.5	13077.6	2296.51	11967.7	9106.06	17779.5	27176	15087.4	15698.6	13328.4	7930.59	20128.3	25828.8	8262.11	5590.62	27101	22519.6	16263.5	19031.4	16540.1	2157.08	30267.5	32716.2	16759.1	28799	11405.1	25559.2	25257.1	21797.9	37251.8	21619
P13671	Complement component C6	12152.8	9885.84	1958.67	10953.4	9797.59	15736.4	7362.4	8297.33	9776.19	9802.82	Filtered	3568.54	5692.46	7729.55	Filtered	Filtered	6613.46	2114.41	Filtered	Filtered	2528.33	Filtered	11070.5	10114	19186	54072.7	11252.7	4021.03	7930.79	3482.71	15210.6	5791.29
P13693	Translationally-controlled tumor protein	18900.4	11834.4	14202	14908	15440.8	32592.7	30722.3	40865.3	11144	12846.2	19723.5	15285.5	33600.9	17848.5	18308.7	40240.6	27338.1	9025.16	24459.5	36830.4	23988.2	Filtered	15099.3	10459.3	24408.9	Filtered	40072.9	58297	44530.3	23320.3	20322.2	28581.3
P13716	Delta-aminolevulinic acid dehydratase	27290.5	30419.4	20890.8	30832	27725.9	24366.2	34300	29826.7	31708.3	30657	23726.4	23055	23552.2	25594.3	27155.4	23937.7	24915.5	34474.9	24795.7	27844.6	32739.5	25237.9	12356.9	12796	19326.7	Filtered	25963.2	39109.1	19216.2	22120.2	25554.1	27447.8
P13796	Plastin-2	16157.9	9040.2	5500.91	Filtered	45971.4	36887.8	17446.7	25943.3	15437.7	33180.6	61083.1	3515.86	146453	111447	37586.1	16829.5	106454	117997	1666.29	8219.39	13229.6	9885.02	63012.1	142778	24330.9	Filtered	91321.3	Filtered	65215.9	33459.3	29363.9	23265.8
P13797	Plastin-3	113610	147645	146895	189698	153927	140864	264890	214988	105331	127190	134150	147225	203794	181474	241554	189636	205606	260512	168276	184791	183622	184836	129735	149540	103035	127177	155331	149571	221310	169726	183104	185158
P13798	Acylamino-acid-releasing enzyme	21012	32038.1	23905.6	36367.6	33458	28270.3	47523.4	47800.8	32138	38639.2	41567.7	38151	36091.4	29839.4	54014.4	50609	31272.1	28834.8	33691.4	37270.5	35718.4	52484.6	24496.4	25416.8	22326.5	49659.4	34349.2	46917.3	44956.7	34901.9	29830.5	39482.5
P13804	Electron transfer flavoprotein subunit alpha, mitochondrial	1280.6	302.379	2285.76	Filtered	843.768	Filtered	Filtered	Filtered	614.054	2254.79	1289.5	1154.83	1571.63	2131.43	Filtered	Filtered	2143.57	3265.48	2918.42	Filtered	Filtered	Filtered	2985.45	3483.3	5087.35	Filtered	Filtered	Filtered	Filtered	1633.96	4522.98	937.754
P13861	cAMP-dependent protein kinase type II-alpha regulatory subunit	2122.02	4288.82	6901.63	Filtered	1724.2	3748.3	Filtered	Filtered	7683.91	5500.54	7638.94	10778.3	3484.07	4648.11	Filtered	Filtered	7793.99	Filtered	9290.98	Filtered	Filtered	Filtered	3531.03	43241.2	6068.15	Filtered	5701.08	Filtered	Filtered	3960.48	63538.6	Filtered
P13928;Q5VT79	Annexin A8;Annexin A8-like protein 2	3911.54	Filtered	943.188	Filtered	7001.85	2250.24	630.177	16310.3	8101.18	2341.32	13098.4	1108.76	10516.9	2226.29	Filtered	Filtered	9713.72	3608.17	4721.58	Filtered	2503.55	Filtered	5120.26	922.14	Filtered	Filtered	Filtered	Filtered	Filtered	7799.63	Filtered	Filtered
P13987	CD59 glycoprotein	15851.2	29838.7	11471	69695.8	36100.7	45474	67911.3	67620.7	24643.6	38841.3	30010.5	20256	27170	17203.5	118463	115490	29391.2	23026.1	18269.1	71156.7	76926.9	126097	34855.1	28304.2	53704.6	140381	42495.1	184970	73837.5	48537.7	12181.2	35751.6
P14174	Macrophage migration inhibitory factor	261921	354548	135896	269463	189006	178008	396069	344856	454177	385446	231379	291993	191355	170796	343497	582346	435544	246697	229538	256925	424440	503310	183597	144494	183191	Filtered	262799	534723	143281	348932	160912	160240
P14314	Glucosidase 2 subunit beta	7847.35	11812.3	10465.5	24440.1	18324	15621.3	41359	47757.3	12215	19619.4	40615.7	21537.1	29341.4	20135.2	100464	108574	32440.6	28463.1	26054.7	95301.8	44864.8	71853.7	14196.7	26335.8	50441.6	143044	33733.4	252084	51260	33508.8	27390.8	40502.9
P14317	Hematopoietic lineage cell-specific protein	Filtered	Filtered	Filtered	Filtered	Filtered	Filtered	Filtered	Filtered	Filtered	1149.93	Filtered	Filtered	6415.14	2265.74	Filtered	Filtered	Filtered	Filtered	Filtered	Filtered	Filtered	Filtered	3116.1	2438.59	Filtered	Filtered	Filtered	Filtered	Filtered	Filtered	Filtered	Filtered
P14324	Farnesyl pyrophosphate synthase	16887.1	20503.9	10283.9	22019.8	14045.8	16231.7	16070.6	18928.5	17814.8	17832.8	24079.8	21406.9	17908.8	14134.1	24590.8	34946.1	27090.6	21500	10852.2	27294.7	16095.5	20096.3	15606.6	13926.4	14409.3	Filtered	22083.4	Filtered	22993.5	12713.7	14343.7	23055.5
P14550	Alcohol dehydrogenase [NADP(+)]	145012	197090	142447	362765	155811	177528	364262	368533	194234	217793	266543	209063	193209	165246	333332	339987	207268	160798	242038	292998	238820	313742	119886	121075	161412	221199	195409	542545	286546	213857	78502.9	120760
P14555	Phospholipase A2, membrane associated	97642.9	177012	52626.4	252221	510406	448120	707032	940279	415423	962303	1.95989e+06	333095	223026	99425.5	2447358	1.52938e+06	1.06076e+06	306369	563129	3.88997e+06	4548572	8477840	455850	261224	651441	7126815	2.98503e+06	20143628	506738	321076	147892	661797
P14618	Pyruvate kinase isozymes M1/M2	932418	1.29012e+06	953906	1.28694e+06	1.25539e+06	1.08776e+06	1477615	1.65743e+06	1.1202e+06	1.42207e+06	1468043	1463231	1.59025e+06	1.34203e+06	1.95211e+06	2.00863e+06	1.8377e+06	1.87316e+06	1.54121e+06	1.7694e+06	2.15148e+06	1896520	1.21136e+06	1131152	1111490	1.48641e+06	1.70812e+06	2053630	1.55975e+06	1.29057e+06	1.34532e+06	1.79902e+06
P14621	Acylphosphatase-2	Filtered	1377.25	3631.47	7195.43	8668.45	8280.7	14793.8	16776.9	10156.7	14268	9163.46	11492.5	9120.61	12519.5	11394.7	12924.7	Filtered	8555.68	4844.86	10727.3	Filtered	11432.5	Filtered	10124.8	Filtered	Filtered	Filtered	9788.24	4601.87	7663.62	1867.95	6387
P14625	Endoplasmin	48459.5	47725.5	30813.1	26980.7	52747.1	41963.8	90984.3	105711	53776.3	52737.2	61335	29570.4	90417.3	90890.8	99330	102104	84792	79777.5	43998.6	101834	49184.6	67396.7	68072.1	99173.2	83028.5	197716	92841.2	211126	117561	116605	108525	50463.8
P14735	Insulin-degrading enzyme	6122.8	7829.9	5567.53	13344.6	4907.36	4843.93	18627.7	12468.4	4809.23	6784.05	9196.39	7313.62	5177.32	5915.63	10712.2	8704.9	7288.98	7929.03	5053.4	17177.3	Filtered	Filtered	8525.84	2760.09	5591.09	Filtered	8941.99	Filtered	8412.85	8292.49	7833.27	8409.1
P14780	Matrix metalloproteinase-9	3768.12	Filtered	Filtered	Filtered	68752.5	24109.6	12744	12709.4	3201.71	3552.82	16235.4	3359.98	9783.31	2100.32	Filtered	22957.7	48450.1	53288.4	14325.3	Filtered	Filtered	Filtered	4725.83	8172.29	Filtered	Filtered	6745.83	Filtered	13388.2	10306.9	Filtered	Filtered
P14854	Cytochrome c oxidase subunit 6B1	Filtered	5732.54	4629.12	Filtered	2358.43	2684.42	9742.37	11878.2	2901.85	2966.11	Filtered	1192.59	4552.08	3336.6	Filtered	Filtered	3647.04	12607.4	2447.12	Filtered	Filtered	Filtered	4097.94	4828.68	24391.4	Filtered	Filtered	Filtered	7426.25	13110.4	23351.7	5190.47
P14866	Heterogeneous nuclear ribonucleoprotein L	12523.3	13799.8	3714.75	Filtered	11771.1	7855.59	Filtered	Filtered	2710.09	3029.24	9614.26	5965.72	5136	7530.37	Filtered	Filtered	13031.8	8219.44	11477.3	23059.3	14284.9	Filtered	13254.7	10389.6	17833.6	Filtered	12010.2	Filtered	11152.3	6735.92	Filtered	6834.45
P14868	Aspartate--tRNA ligase, cytoplasmic	5083.7	4730.82	4499.74	3656.56	7779.49	3753.53	Filtered	Filtered	6602.71	5363.05	5041.45	5383.48	5675.16	3737.94	5468.59	11467.2	6611.5	4876.89	5515.55	7793.59	5777.93	6247.19	4188.58	5154.14	8800.78	Filtered	7753.43	Filtered	4864.08	7003.9	2064.98	3904.08
P14923	Junction plakoglobin	14014.1	11850.7	14263.9	9675.09	4208.15	5158.48	7445.62	5209.55	10351.4	7621.66	3659.32	5791.37	2101.18	2339.01	6274.01	Filtered	11928.1	10216.8	13548.7	23225.4	8443.4	6471.9	6025.12	3570.36	27307.5	12795.2	10232.4	Filtered	10184.3	8842.79	5475.86	3565.81
P15104	Glutamine synthetase	54543.6	79330.1	94464.5	197428	56161.8	45539.9	57957.1	69881.8	32510.5	32596.4	61199.5	40091.4	29712.7	18522.2	20345.9	21607	114911	115708	44003.8	40149.6	78369.1	51363.1	94239.7	24143.4	17123.8	64729.2	10556.8	36589.7	87506.4	85168	25478.3	37208.8
P15121	Aldose reductase	57515.7	33589.2	30568	24405.6	74596.2	69442.8	96814	102591	17026.3	26669.3	11252	26589.4	58366.3	51312.5	72700.1	43037.9	21120.5	32884.9	63192.6	75869	13160.8	15944	39684.4	19596.7	8467.53	Filtered	26463.4	Filtered	33689	11436	27123.2	7063.32
P15144	Aminopeptidase N	16803.1	17399.7	4866.29	39641	9185.48	14959	637.847	11728.2	7847.85	7650.54	2327.6	2141.02	Filtered	1714.31	14545.9	14244	21151.3	9436.54	13316.4	58319.2	23020.9	40159.5	Filtered	Filtered	20304.1	Filtered	18809.1	Filtered	19814.9	12462.2	6350.73	6938.3
P15153	Ras-related C3 botulinum toxin substrate 2	Filtered	Filtered	Filtered	Filtered	6707.44	4634.92	Filtered	Filtered	2432.85	Filtered	15087.7	Filtered	8609.69	9325.79	Filtered	Filtered	25236.4	25039.2	Filtered	Filtered	Filtered	Filtered	14635.8	18437.2	Filtered	Filtered	Filtered	Filtered	Filtered	Filtered	Filtered	Filtered
P15170	Eukaryotic peptide chain release factor GTP-binding subunit ERF3A	6903.91	7514.37	8139.24	9418.67	6787.49	5599.04	2105.27	8662.01	7679.95	6569.58	9738.22	9358.27	8974.78	6977.55	1622.72	12871.2	9840.39	8220.26	6052.75	Filtered	3829.54	2731.31	4230.59	5996.21	Filtered	Filtered	4827.31	7175.05	Filtered	1941.7	2625.3	6121.75
P15289	Arylsulfatase A	4257.14	3001.9	2066.38	Filtered	7101.47	3848.45	9986.65	26244.4	3281.52	7719.51	9982.3	2751.75	12141.5	5215.13	16775	8957.64	8474.81	6541.41	3948.95	29724.9	Filtered	Filtered	5160.23	3772.24	11816.6	30202.9	11529.5	110121	12100.4	6736.27	5485.66	13890.8
P15291	Beta-1,4-galactosyltransferase 1	7634.03	4976.03	1989.93	14952.2	16585.8	6707.84	21069	14286	4161.22	8593.58	10959.2	5517.9	12904	8664.12	25395.6	28251	7432.91	6964.61	4166.05	28157.8	9365.24	28056.1	16783.5	14049.1	13218.8	26780.2	21036.7	28786.7	20319.5	14265.2	9488.15	6999.44
P15309	Prostatic acid phosphatase	1019.13	3647.84	1637.82	7020.12	3547.14	1966.91	6101.72	7305.64	2072.69	3475.45	6204.19	1662.88	Filtered	550.023	11213.8	11576	4693.54	3302.24	5459.94	20109.6	9861.34	Filtered	1099.48	1095.29	8184.31	14254.3	5902.59	48431.3	4286.57	7599.8	2008.95	2945.67
P15311	Ezrin	124619	170559	219860	268155	149935	194034	309792	233470	171581	214431	141324	230031	203612	205382	329804	331133	195278	201843	304833	195375	242237	246047	121707	117543	140571	192285	152634	445179	278434	252906	371953	249703
P15328	Folate receptor alpha	Filtered	4182.93	790.619	1645.47	10373.7	3433.44	4352.39	Filtered	Filtered	Filtered	Filtered	Filtered	15550.6	7662.57	6487.64	1898.15	11958.2	3864.63	Filtered	17441.1	6085.31	14309.4	9202.07	4843.23	Filtered	Filtered	7439.15	21379.2	4184.99	30510.1	5280.42	Filtered
P15374	Ubiquitin carboxyl-terminal hydrolase isozyme L3	10933.6	8848.52	15742.4	13477	11423.7	11723	27816.4	20521.6	10337.6	14141.8	14173.4	13764.9	12096.3	13211.7	19313.3	18703.2	18205.8	13336.3	18035.6	Filtered	22022.5	Filtered	11723.2	13101.6	13550.5	Filtered	14522.7	7126.02	12667.2	22126.6	15620.9	21232.5
P15498	Proto-oncogene vav	6181.24	6889.1	5881.17	18241.2	8661.99	6343.4	Filtered	Filtered	7946.01	10353.3	8323.62	5657.27	10607.9	7713.02	Filtered	Filtered	4028.88	7572.63	4873.22	Filtered	Filtered	Filtered	6385.18	3691.01	6143.62	Filtered	Filtered	Filtered	10236	6261.38	1465.14	5499.89
P15531	Nucleoside diphosphate kinase A	17888.9	25720	10782.8	58586	47932.1	22238.7	70471.1	89241.5	9888.4	7211.9	25173.5	25886.2	35303.5	14839.9	58338.2	60641.8	59233.1	20260.7	24275.1	52203.4	68668.1	Filtered	4101.81	25683.6	29979.8	Filtered	35782.5	Filtered	61673.4	28311	4375.39	22702.9
P15559	NAD(P)H dehydrogenase [quinone] 1	6950.06	10408.6	9136.55	40304.5	20157.5	6106.66	34954.4	27787.3	8718.62	11477.3	39277.9	13359	14291.9	15820.3	27511.1	30824.4	5059.3	5198.55	35860.9	53701.2	Filtered	Filtered	6455.17	Filtered	12381.2	72834.9	26268.2	23999.1	50426.7	24337.3	16364.9	15643.9
P15814	Immunoglobulin lambda-like polypeptide 1	9392160	172450	109563	180064	556703	1.413e+06	14682487	16961270	4871254	21043522	5683704	4358114	14464482	5488843	49683708	6641566	693214	172013	416344	22379088	42785416	24094048	8647769	7859247	14050943	87091240	26051110	19489348	1.86248e+06	7.47195e+06	2519338	4.47803e+06
P15880	40S ribosomal protein S2	10278.8	11771	27437.3	8818.4	7229.94	6240.3	4420.63	3419.54	97772.3	13435.9	5794.05	35616.4	11874.6	21037.3	6139.72	11699	3017.46	7615.43	72271.5	19030.7	18429.3	17814.9	20329.1	13513.8	44182.9	Filtered	10501.7	Filtered	4366.68	62776.5	4772.63	33195
P15907	Beta-galactoside alpha-2,6-sialyltransferase 1	2623.69	2122.23	4023.95	11608.9	10008.1	9928.09	18363.3	10233.3	2328.01	7473.32	6551.85	1576.72	6251.49	789.767	14764.5	10863.1	6861.37	6545.5	8540.39	32725.1	9699.14	19525.8	Filtered	4935.48	10587.3	42622.7	11540.5	58227.6	15637.8	5007.27	Filtered	4959.57
P15924	Desmoplakin	9121.4	3806.66	3718.04	4051.36	4232.3	5439.6	1.23126	7578.1	3503.1	5116.38	5482.43	2976.32	3068.35	1586.83	6105.09	Filtered	7118.15	4101.52	5047.68	Filtered	12188	2.39705	4935.64	7063.36	5576.09	Filtered	3636.87	Filtered	10407.6	5999.4	4573.21	3920.64
P15927	Replication protein A 32 kDa subunit	2708.97	6771.17	2797.4	Filtered	Filtered	Filtered	Filtered	Filtered	Filtered	605.741	Filtered	3833.43	Filtered	806.46	Filtered	Filtered	Filtered	Filtered	634.885	Filtered	Filtered	Filtered	363.882	Filtered	Filtered	Filtered	Filtered	Filtered	Filtered	Filtered	Filtered	Filtered
P15941	Mucin-1	11378.5	20181.9	12188.6	13858.3	13448.7	19138.6	5999.16	5939.32	13507.9	8604.08	4622.18	13087.6	14800.1	8473.44	23776.4	8299.91	28085.6	21048	37421.9	Filtered	9399.1	13746.7	10193.8	3643.53	14896.6	Filtered	10830.7	9155.33	22468.8	30731.5	15684.6	18847.3
P16035	Metalloproteinase inhibitor 2	2723.5	4104.46	1846.54	7224.43	3069.59	5851.76	13313.3	14477.8	2528.11	4824.27	9318.92	3284.37	3858.11	3605.46	20406.6	31036.6	7230.73	10267.7	5004.41	16772	Filtered	50166.9	Filtered	2413.96	6410.29	Filtered	5199.7	41441.5	16086.9	13204.5	1411.53	7226.5
P16083	Ribosyldihydronicotinamide dehydrogenase [quinone]	9036.22	9464.26	4000.23	19516.1	13653.9	Filtered	Filtered	Filtered	Filtered	Filtered	Filtered	19210.9	Filtered	4834.11	Filtered	28933.6	Filtered	Filtered	6812.68	Filtered	Filtered	Filtered	Filtered	3425.31	13820.3	Filtered	49661.1	Filtered	Filtered	Filtered	17725.6	33055.9
P16152	Carbonyl reductase [NADPH] 1	62594.4	73622.6	32562.4	57681.6	49878.6	51454.3	63623.9	89744.4	85535	82194.5	78346.2	65571.7	57931.2	71003.8	76348.6	111753	93742.2	71748.8	74066.9	131043	103596	106719	95097.5	74533.8	34211.8	19085.3	120793	148236	81423.2	64182.3	44082.8	67624.1
P16401	Histone H1.5	28531.1	45485.8	15419.3	Filtered	23282.7	50367.3	7653.12	26066.7	10591.8	34687.3	36829.8	Filtered	25139.5	6234.79	Filtered	20696.6	44545	33094.6	12348.8	Filtered	Filtered	37399.2	22193	18041.9	Filtered	Filtered	Filtered	Filtered	6616.52	Filtered	8894.14	35898.3
P16455	Methylated-DNA--protein-cysteine methyltransferase	Filtered	Filtered	1424.8	Filtered	Filtered	Filtered	Filtered	Filtered	4473.8	4598.25	Filtered	Filtered	Filtered	1608.55	Filtered	Filtered	Filtered	Filtered	3928.4	Filtered	Filtered	Filtered	Filtered	Filtered	Filtered	Filtered	Filtered	Filtered	Filtered	Filtered	Filtered	Filtered
P16930	Fumarylacetoacetase	6801.36	6156.61	6140.59	5615.57	7375.84	7451.81	21391.7	27428.3	7310.59	9476.84	9898.97	10376.7	6378.78	8408.45	Filtered	Filtered	7734.1	7780.93	11753.7	12784.5	8794.03	Filtered	8416.53	10520.7	3942.83	Filtered	9595.56	5926.88	9017.46	9499.66	8190.02	13853.1
P16989	DNA-binding protein A	5262.33	4677.06	8169.5	Filtered	5157.13	729.379	5611.74	6533	Filtered	6092.42	Filtered	4407.19	4878.94	2459.71	Filtered	Filtered	4112.2	4429.18	10369.8	Filtered	5673.1	Filtered	3664.66	2542.95	11144.4	Filtered	2864.02	Filtered	Filtered	5145.86	6795.79	6155.95
P17050	Alpha-N-acetylgalactosaminidase	8627.91	8475.22	2307.94	Filtered	3496.26	5711.42	Filtered	Filtered	8211.75	2972.77	6725.39	6024.44	3177.88	5908.99	3789.98	Filtered	6422.5	4493.53	1701.24	6347.47	3623.52	5551.65	Filtered	7036.25	Filtered	Filtered	Filtered	7322.37	3679.01	4399.9	5832.86	6927.36
P17096	High mobility group protein HMG-I/HMG-Y	840.848	1748.11	249.34	Filtered	5578.08	Filtered	1843.42	2080.88	Filtered	2223.61	2045.72	8652.57	2606.54	1238.18	Filtered	Filtered	Filtered	1407.56	9538.84	Filtered	Filtered	Filtered	Filtered	Filtered	7797.92	Filtered	Filtered	Filtered	Filtered	Filtered	Filtered	Filtered
P17174	Aspartate aminotransferase, cytoplasmic	10875.1	47363.4	19512.6	28369	11441.5	11107.7	23954.9	37969.1	58548.5	20845.8	13496.9	18040.6	16309.6	8737.42	27979.2	22178.7	17447.5	20500.8	13440.6	18474.4	24644.8	27866.3	15000.7	13428.6	9251.44	23059.2	17252.6	31329.9	10194.3	20033.8	25736.6	32711.6
P17655	Calpain-2 catalytic subunit	60691.6	80808.9	63261.4	123917	64981	47647	79759	84394.4	61103.3	60496	35239.2	66734.6	48506.4	41355.8	56091.4	79656.5	104899	101430	72398.8	102360	92478.7	72162.7	57079.6	41895.3	41347.4	28604.1	56667.3	65913.9	52309.4	46058.2	35760	45376.6
P17812	CTP synthase 1	5937.44	4572.02	21240.5	30620.1	31668.2	13263	22439.1	13657.4	8292.68	5098	15843.8	11805.1	23509.4	27656.4	18264.5	12940	8504.58	11431	16527.4	Filtered	24484.3	10031.7	41405.6	34046.4	9471.28	Filtered	27975.3	30275.6	24739.8	29002.1	8512.08	11284
P17858	6-phosphofructokinase, liver type	21067.3	35190.6	19368.5	30874	32586.2	28262.8	21141	21233	30956.3	27678.1	33122	36171.6	21800	18511.3	37509.9	32512.9	25871.3	31906.8	52550.9	27690.6	45311	58381.9	17139.6	20487.6	12913.9	28631.6	22176.1	18459.8	29710.6	35773.1	18671.3	39654.2
P17931	Galectin-3	467560	533016	629587	920709	609500	685106	1.4889e+06	1.42916e+06	644338	504248	438206	689524	367380	488108	763966	773094	739398	537676	634425	560463	593088	432712	342639	267017	334100	345142	391451	677574	612846	425476	1072360	1.19282e+06
P17936	Insulin-like growth factor-binding protein 3	14080.1	16296.2	9207.45	27342.1	19972.5	27835.6	29056.5	55426.1	12998.3	11450.4	34685.2	9624.9	18690.3	10935.3	Filtered	Filtered	12606	24567.2	9791.22	Filtered	40905.1	Filtered	17225	21747.6	28798.3	Filtered	Filtered	Filtered	39851.5	17659.2	31990.6	17486.4
P17980	26S protease regulatory subunit 6A	11780.4	16823.9	18975	21880.3	17271.5	16893.8	18646	18765.6	15401.7	17493.8	19043.3	15821.9	20718.6	13785.7	27487.9	20239.5	12836.4	18068.6	18973.8	8479.27	23143.8	22349.8	17646.8	15319.9	14111.1	Filtered	26235.2	Filtered	12988.9	20501.4	14811.1	17090
P17987	T-complex protein 1 subunit alpha	24932	31120.1	20917.9	35874.4	25159.8	21818.3	28302	27218	27407.3	27000.2	37825.5	27467.1	25544.1	23710.5	35938.1	31704.9	29783.6	27510	36314.7	41608.5	36193.7	14405.2	21709.8	17204.4	26670.2	91962.8	26687.3	55404.5	25344.7	28000.7	14586.7	27362.6
P18077	60S ribosomal protein L35a	Filtered	Filtered	1911.74	Filtered	Filtered	Filtered	Filtered	Filtered	Filtered	Filtered	Filtered	Filtered	Filtered	Filtered	Filtered	Filtered	Filtered	7484.86	2176.64	Filtered	Filtered	Filtered	Filtered	Filtered	Filtered	Filtered	Filtered	Filtered	Filtered	Filtered	Filtered	Filtered
P18085	ADP-ribosylation factor 4	10041	7498.61	16170.8	19514.9	5928.44	7296.73	10240.8	7860.19	11260.9	16193.4	9178.38	9344.88	11189.2	8556.07	9960.07	12768.6	16553.6	18031.6	12861.3	9206.37	21068.2	29540.2	19740.4	14786.2	13202.8	Filtered	24449.9	9760.83	26921.5	20118.8	18615.7	14556.7
P18124	60S ribosomal protein L7	2480.93	3802.65	8643.35	4654.61	8115.78	5477.91	Filtered	Filtered	6392.46	7238.15	4894.8	9023.11	9184.2	6518.21	Filtered	Filtered	Filtered	3781.6	17031.3	15384.1	Filtered	Filtered	9087.57	11266	14663	25561.6	5796.69	Filtered	Filtered	6096.53	1026.73	4018.41
P18206	Vinculin	36310.6	37539	37415.6	45158.5	28394.6	26000.9	78126.9	82824.8	38850.9	34414.8	39060.7	44544.6	31032.8	23879.9	31976.2	32003.1	56246.5	54928.6	29335.2	37525.4	45287.2	45939.3	44923.2	32129.3	25037.2	19932.3	30514.2	43222.2	44065.3	41527.8	50073.5	38807.3
P18283	Glutathione peroxidase 2	Filtered	Filtered	Filtered	Filtered	Filtered	Filtered	Filtered	Filtered	Filtered	Filtered	Filtered	Filtered	Filtered	Filtered	Filtered	Filtered	Filtered	Filtered	Filtered	Filtered	Filtered	Filtered	3543.41	Filtered	Filtered	Filtered	Filtered	Filtered	Filtered	Filtered	Filtered	Filtered
P18428	Lipopolysaccharide-binding protein	6559.28	5650.76	685.144	Filtered	6536	12540.8	Filtered	Filtered	4421.17	8280.7	Filtered	1229.64	Filtered	1675.71	Filtered	Filtered	1576.04	538.241	Filtered	Filtered	1626.54	Filtered	21231.2	7406.98	3754.34	21676.7	7738.11	Filtered	Filtered	Filtered	3140.13	955.866
P18510	Interleukin-1 receptor antagonist protein	107396	87892.5	297274	416979	135949	119669	602506	425198	145107	162642	73286.4	123174	131112	162077	276595	178819	123899	189563	106658	156389	314752	263829	262826	91884.3	87269.9	133504	127634	216594	179051	340910	332519	255450
P18621	60S ribosomal protein L17	11426.7	14898.7	12924.3	3149.88	8925.28	Filtered	12581.4	Filtered	10221.4	12529.3	2237.52	9135.73	12690.3	18085.4	Filtered	Filtered	Filtered	Filtered	18103.3	Filtered	Filtered	Filtered	31329.9	33349.7	3179.3	Filtered	25182.3	Filtered	Filtered	16423.8	Filtered	17440.8
P18669	Phosphoglycerate mutase 1	118760	171355	121593	304135	121230	117525	274498	248910	114720	167140	148964	221670	161051	154521	210351	205347	206670	223550	176981	295807	166535	300668	101699	94816.2	91968.9	211181	141511	253870	225992	172841	185911	162553
P18754	Regulator of chromosome condensation	1331.6	1396.92	890.578	Filtered	1894.82	1403.22	Filtered	Filtered	Filtered	1328.22	634.017	1110.75	Filtered	857.009	Filtered	Filtered	Filtered	1337.06	1223.85	2797.52	Filtered	Filtered	972.583	Filtered	3754.91	Filtered	Filtered	Filtered	Filtered	Filtered	1611.32	Filtered
P18827	Syndecan-1	99970	125103	98164.9	165300	120555	143320	247244	293385	160827	153638	153327	125419	104357	101334	129907	67726	139014	148573	194596	117427	178893	266723	67566.8	77009.2	260199	326218	156734	Filtered	190173	180793	159339	67107.3
P19013	Keratin, type II cytoskeletal 4	61835.6	10416.4	12144.5	14904.6	37744.9	59801.7	18582.5	37236.3	23302.5	25217.6	1828.84	8438.9	10909.5	18638.2	12381.6	16365.4	15442.5	10003.5	4627.88	29244.9	53378.3	74554.6	3924.96	5209.28	147768	166168	13534.5	3116.76	10807.6	12701.9	6921.23	9980.47
P19021	Peptidyl-glycine alpha-amidating monooxygenase	5462.98	13673.5	3976.55	18429.1	12924.2	13276.3	22549.6	21154	2703.74	11125.4	24687.1	11283.3	8272.58	8126.29	48154.2	89035.4	26464.8	16131.7	35217.4	79014.3	30589.6	55409.6	13294.6	12689	45217.9	145825	32978.3	133272	29693.3	17813.2	11857.2	17379.8
P19338	Nucleolin	31155.5	32865.6	22078.7	9258.45	16640.7	14703.3	17905.2	26093.5	12070.3	24455.2	18055.6	19758.9	23865.9	22839.3	Filtered	Filtered	26049.8	32555.4	50392.2	49867.6	22197	15118.9	27388.2	43887	89964.7	74195.6	38455.3	Filtered	30464.5	39866.4	31635.3	15141.6
P19474	E3 ubiquitin-protein ligase TRIM21	3767.97	Filtered	566.712	Filtered	Filtered	Filtered	Filtered	Filtered	1860.15	1931.08	Filtered	948.369	445.584	2556.62	Filtered	Filtered	Filtered	Filtered	Filtered	Filtered	Filtered	Filtered	2498.06	3567.6	Filtered	Filtered	4772.99	Filtered	Filtered	1547.47	1488.14	1892.24
P19525	Interferon-induced, double-stranded RNA-activated protein kinase	Filtered	Filtered	588.636	Filtered	354.01	Filtered	Filtered	Filtered	Filtered	447.162	548.536	149.249	658.602	903.505	Filtered	Filtered	Filtered	Filtered	Filtered	Filtered	Filtered	Filtered	324.335	878.558	Filtered	Filtered	Filtered	Filtered	Filtered	Filtered	Filtered	Filtered
P19652	Alpha-1-acid glycoprotein 2	248348	194656	86836.9	129933	487781	672761	208169	370650	298116	264819	186525	212036	173763	235778	96827.7	173165	448530	158873	130119	162322	406866	1.19396e+06	626756	594485	609734	1.88043e+06	480927	516562	414731	229648	466846	171492
P19823	Inter-alpha-trypsin inhibitor heavy chain H2	219107	105331	26936.4	25015.2	134780	249433	104625	125225	108034	98089.9	35767.6	41899	95767.4	100478	36690.2	61735.4	133949	49439.9	11448.6	10481.9	135330	203040	263218	185605	383844	810636	107943	48580.2	90183.2	33113.4	155926	72606.3
P19827	Inter-alpha-trypsin inhibitor heavy chain H1	78080.3	42069.5	9102.05	8559.93	48105.9	90714.5	43846.3	49880.7	42435.9	48542	14807.4	16317.1	25886.7	32105.6	12957.9	13893.2	37745.4	14974.7	3848.8	Filtered	48324.4	99472	84278.2	62045.4	93690.9	319304	44609.9	19543.9	37931.4	13733.7	56752.3	26639.5
P19838	Nuclear factor NF-kappa-B p105 subunit	2436.4	4833.09	1627.38	Filtered	Filtered	9255.55	Filtered	Filtered	1393.16	6832.04	9063.78	Filtered	3372.37	3684.35	Filtered	Filtered	3342.77	5847.84	5765.42	Filtered	Filtered	Filtered	3892.12	4858.91	Filtered	Filtered	Filtered	Filtered	Filtered	Filtered	2157.76	6546.09
P19957	Elafin	7403.78	12514.1	3892.44	43254.5	8532.24	10443.3	Filtered	9225.76	3620.86	4797.85	4989.68	6999.24	18830.6	10346.3	38776	46518.8	56109.1	34955.1	16679	Filtered	35601.6	73699.9	11588.9	13173.5	51908.3	166475	24327.8	50086.2	31515.9	22471	7575.24	14285.2
P19971	Thymidine phosphorylase	47597	51634.6	53239.5	76391.4	100447	66162	98191.3	95962.2	70241.1	69615.4	67499.9	45526.9	513238	460453	106377	101258	52322.8	43739.7	19512.6	22888.9	110451	129629	248085	385602	21028.9	19818	277610	199081	94889.9	88434.9	250977	228600
P20042	Eukaryotic translation initiation factor 2 subunit 2	2448.53	6523.97	Filtered	Filtered	4543.96	3725.29	27717.6	7365.14	3730.97	26914.8	7023.56	3355.46	2326.31	5650.36	Filtered	2966.93	Filtered	Filtered	32092.9	49730.1	Filtered	Filtered	7066.51	6497.81	11217.5	11743.3	Filtered	Filtered	Filtered	21246.5	1888.79	2299.1
P20061	Transcobalamin-1	52781.4	140224	77153	363799	217946	205040	301819	284921	66350.4	95589.1	232334	111189	138093	105674	331960	371990	258699	166217	117504	1.07188e+06	498602	987413	134725	185071	322376	1.26333e+06	409542	1.95753e+06	641647	518444	68500.5	124066
P20073	Annexin A7	14530.1	15126.6	10303.8	16139.4	26044.3	14768.5	41949.8	34716.4	20692.8	12209.2	20619.3	23274.5	11622.8	10722.6	16803.9	13766.2	16591.2	26860.3	14972.6	15872.6	25524.5	22124.1	13558.4	5981.06	9636.83	Filtered	5475.11	93534.7	12962.6	8670.99	11797.9	13222.5
P20160	Azurocidin	Filtered	Filtered	Filtered	Filtered	26335.1	17686.9	Filtered	13511.4	Filtered	Filtered	6876.34	Filtered	14301.7	Filtered	Filtered	Filtered	61113.9	62503.8	Filtered	Filtered	Filtered	Filtered	8226.92	Filtered	Filtered	Filtered	4425.29	Filtered	16973.3	Filtered	794.574	1383.01
P20339	Ras-related protein Rab-5A	25273.3	36968.7	40662.7	47173.9	23849.8	21608.6	28755.3	39818	22892.9	40970.7	35247.2	54783.3	25754.3	35112.2	359812	45883.1	29209.6	74110.4	34611.5	75358.8	88692.6	75945.4	24519.9	14953.7	15879.9	644486	55244.8	5.59163e+06	59103.1	38239.8	49241.1	30999.5
P20591	Interferon-induced GTP-binding protein Mx1	10576.5	7826.84	6867.43	10335.4	6601.41	5113.6	6034.72	2697.4	2751.79	2840.8	8530.36	3984.87	17554.2	15324.5	7463.45	4911.39	2677.29	7859.09	1880.72	Filtered	12030.8	Filtered	14970.7	18179	10914	12435.3	34655.1	32266.2	11728.3	18218.2	21463	18191.8
P20618	Proteasome subunit beta type-1	35360	41215.8	35984.6	36582.9	26869	36756.1	50125.6	44481.5	34668.6	28600.2	48653.8	42186	45562.7	44390.7	18960.5	33575.6	47458.9	45914.7	49920.2	34990.2	56969.7	23496.9	34888.5	44963.6	23348.1	Filtered	52093.7	33887.6	43084.6	39277.1	41555.2	57059.1
P20700	Lamin-B1	4026.67	5008.77	3939.21	Filtered	3634.67	3141.2	Filtered	Filtered	1522.43	2671.69	2400.76	2065.15	2200.07	2940.24	Filtered	Filtered	3140.9	2812.36	Filtered	Filtered	Filtered	Filtered	3902.08	8211.03	2346.32	Filtered	1.12079e+06	Filtered	Filtered	1124.3	1492.44	Filtered
P20810	Calpastatin	32421	42129.2	61087.6	70113.1	40581.5	34407.9	46395.9	34781	32667.2	24299.1	39623.2	55975.1	69929	61520.7	71429.1	82391.6	58713.3	61911.1	96118.2	74516.1	46707.5	47286.3	56592	49005.6	52448	52426.4	58718.3	67653.6	54389.5	65445.9	75767.6	81811
P20936	Ras GTPase-activating protein 1	Filtered	Filtered	953.625	Filtered	Filtered	Filtered	Filtered	Filtered	883.335	1443.95	Filtered	Filtered	Filtered	845.299	Filtered	Filtered	11784.6	1348.58	1433.32	Filtered	Filtered	Filtered	Filtered	1513.42	Filtered	Filtered	Filtered	Filtered	Filtered	Filtered	Filtered	Filtered
P21127;Q9UQ88	Cyclin-dependent kinase 11B;Cyclin-dependent kinase 11A	24256.6	12630.4	5363.62	32897.4	13376.7	13016.1	61673.9	Filtered	7518.07	6637.67	9190.31	57461	36520.7	25866.1	30716.2	Filtered	27974.5	22202.2	10393.3	Filtered	10829.3	93003.6	21073	9597.16	Filtered	Filtered	10421.8	Filtered	57467.4	45860.6	36864.3	23518.5
P21217;Q11128	Galactoside 3(4)-L-fucosyltransferase;Alpha-(1,3)-fucosyltransferase	2735.54	2325.88	1778.33	6281.8	2356.68	2703.85	Filtered	1759.33	3235.41	3366.63	4856.37	2622.65	Filtered	Filtered	Filtered	4278.64	4471.71	2904.41	2768.17	15952.2	3951.05	Filtered	1894.88	Filtered	7588.48	40822.9	2405.33	Filtered	Filtered	6188.86	Filtered	Filtered
P21281	V-type proton ATPase subunit B, brain isoform	16057.3	24714.2	26567.3	19310.1	14199.4	18543.4	52120.6	45435.6	24584.3	30081.7	34096.2	35544.8	28297.7	33339.7	38205.6	24347.3	35291.8	53787.7	49274.5	43021.1	34991.5	22935.3	29835.2	22996.5	27117	33007.2	27561.5	45105.2	29820	24035.9	38887.5	36053.9
P21291	Cysteine and glycine-rich protein 1	20402.2	5787.22	3986.72	3420.87	3282.94	4065.5	Filtered	Filtered	7180.48	3724.42	6868.95	7647.97	5775.88	5858.59	8758.52	Filtered	3754.97	4899.03	3978.84	13968.7	Filtered	Filtered	6532.21	3300.8	3985.21	Filtered	5417.18	Filtered	Filtered	2262.37	6071.5	3551.7
P21399	Cytoplasmic aconitate hydratase	8795.78	11873.5	7181.96	10249.7	9072.48	8377.66	20926.5	21136	9986.21	13992.4	12498.2	13815.6	9657.4	7853.68	23225	19295.7	14351.1	16645.3	11738.5	15654.7	19304.2	10305	9022.23	6480.01	7252.72	9540.22	19261.5	14944	12513.1	11165.5	11177.5	17227.4
P21926	CD9 antigen	Filtered	Filtered	13981.6	47781.3	Filtered	Filtered	Filtered	Filtered	5014.91	Filtered	Filtered	Filtered	Filtered	Filtered	46739	43946.5	Filtered	Filtered	28763.1	54617.6	39898.4	134981	1273.41	Filtered	Filtered	Filtered	Filtered	116288	40875.8	17434.6	Filtered	5089.91
P21964	Catechol O-methyltransferase	43790.6	48422.3	29820.6	76415.3	28161.1	35362.2	58465.2	88489.7	43982.5	47169.2	49541.9	47585.8	41736	31205.9	74938.1	85444.4	47046.6	37468.1	48654.2	68282.4	61413.2	90850	21301.3	21302.7	36016.5	55843.6	49828.1	64123.5	61019.7	44693.4	39264.9	48245.9
P21980	Protein-glutamine gamma-glutamyltransferase 2	757665	636710	316384	691143	965120	1.00203e+06	881247	741662	869698	1.50841e+06	888881	507600	2487741	930985	2.10882e+06	2347684	326570	215235	401116	662178	1.36235e+06	1.59814e+06	1.17601e+06	1.42339e+06	455444	812946	1.73234e+06	2.47349e+06	818565	824117	610169	1.90424e+06
P22059	Oxysterol-binding protein 1	4009.32	3291.18	4217.2	Filtered	2911.16	1171.31	2172.09	Filtered	4003.05	2373.25	3465.04	3290.5	6049.09	3027.19	14103.7	7079.05	4982.56	8126.35	3997.27	Filtered	9915.73	6920.86	2130.48	2895.43	5544.24	Filtered	7399.19	Filtered	5773.27	7801.9	2577.09	8915.44
P22061	Protein-L-isoaspartate(D-aspartate) O-methyltransferase	4428.83	12678.8	7058.91	14030.9	3874.56	29687.4	11874	23039.2	3409.72	6366.26	8154.46	7509.86	10372.2	6343.69	46895.8	19307	13294.9	9866.51	5171.83	18798.3	20213.8	18178.3	5246.41	5027.66	6226.71	Filtered	7026.55	16179	17152.6	4594.34	4251.1	5319.26
P22079	Lactoperoxidase	173302	223862	130520	824230	503014	656597	626534	564220	259707	443659	752041	303403	71475	88421.5	887261	1.08332e+06	363185	259477	516563	2949209	831409	1.54694e+06	273539	380037	1.07805e+06	6267776	515305	5.27177e+06	1291048	858524	156541	637368
P22102	Trifunctional purine biosynthetic protein adenosine-3	12935.5	17127.9	6189.44	15418.2	10435	11590.7	18671.5	13150.2	16702	15346.6	15567.1	16598	16585.1	15312.1	15796.5	35875.9	13735.8	15446.7	11781.2	4775.3	15469.4	1.00437e+06	12174.5	13500.2	7341.65	Filtered	23017.1	16209.6	20065.8	14364.6	15495.8	13967.7
P22234	Multifunctional protein ADE2	11389.9	12593.5	11684.8	11073.7	14362.1	10465	12110.2	16602.6	11113	17761.5	16681.7	13921.5	10678.3	6369.26	10935.2	Filtered	4689.54	10231	13538.7	7535.53	20068.5	6652.56	8947.31	8516.81	14994.5	Filtered	4893.91	Filtered	5128.36	10292.5	3508.38	3954.39
P22314	Ubiquitin-like modifier-activating enzyme 1	75195.4	83524	68957.2	110246	81256.8	71082.5	70542.1	90535.9	70411.8	84071	96553	94139.1	87128.5	74910.2	123655	120946	79289.5	75582.1	74226.6	108775	126675	139880	74096	66094.8	60558.5	86598.2	107903	158832	97115.7	81317	71593.3	103482
P22352	Glutathione peroxidase 3	32538.3	47857.4	14361.2	66437	53544.7	52886.2	63995.8	66388.7	27011.3	37932.1	84834	40283.3	32897.1	20694.6	85268.5	83517.9	63154.9	38458.3	35355.4	219411	120878	255584	32824.7	34097.1	89849.5	525369	104254	666286	170965	90161.5	44439.4	53362.5
P22392	Nucleoside diphosphate kinase B	36891.7	62911.1	46268	65498.3	49933.7	49711.3	99871.2	83958.9	58566.6	63804.3	69564.7	90739.5	62949.1	49616.7	95538.8	87961.9	91752.6	72901.9	75524.5	60580.7	98280.3	90747.1	63401.6	58620.5	48954.3	74877	78226.9	233240	58384	69760.4	69318.8	82037.6
P22528	Cornifin-B	49412.1	154896	68333.2	232919	49531.3	89916.8	83400.7	136546	110099	88089.9	46732.9	68293.3	69520.9	44126.4	37774.8	44540	328294	389851	37506.4	66273.1	156479	127986	163126	130257	62091.7	219759	73423.2	206377	168168	128368	118379	72429.4
P22626	Heterogeneous nuclear ribonucleoproteins A2/B1	90187.9	67418.3	56034	27625.8	76761.3	59195.4	79234	97003.1	46887.1	80159.1	51416.9	63964.1	78076.3	86906.6	40192.8	9427.18	87565.2	81830.8	154082	184269	54003.6	44273.3	99670	119018	242591	201217	103944	43508.2	106725	108897	121600	51420
P22792	Carboxypeptidase N subunit 2	4900.94	Filtered	Filtered	Filtered	Filtered	10589	Filtered	Filtered	2223.28	Filtered	Filtered	Filtered	Filtered	Filtered	Filtered	Filtered	Filtered	Filtered	Filtered	Filtered	Filtered	Filtered	6770.84	8178.64	Filtered	Filtered	Filtered	Filtered	Filtered	Filtered	Filtered	Filtered
P22894	Neutrophil collagenase	Filtered	Filtered	Filtered	Filtered	3122.19	939.554	Filtered	Filtered	Filtered	Filtered	7008.02	Filtered	Filtered	Filtered	Filtered	Filtered	20343.3	19019	Filtered	Filtered	Filtered	Filtered	Filtered	Filtered	Filtered	Filtered	Filtered	Filtered	15380.2	6905.14	Filtered	Filtered
P23083	Ig heavy chain V-I region V35	294549	250946	34050.1	156573	253809	290246	265027	292490	81707.7	107772	204945	34261	125654	58360.8	1.33598e+06	1.4161e+06	191164	115642	103313	610579	897129	1.96931e+06	164528	135372	259125	1.84375e+06	77029	395847	526326	278944	122773	249217
P23141	Liver carboxylesterase 1	3656.5	2792.07	1952.61	Filtered	5324.72	2937.23	Filtered	Filtered	687.451	1223.78	9445.18	6277.17	2650.46	2679.61	7365.24	7652.09	4962.88	3440.27	Filtered	8422.25	Filtered	Filtered	26005	Filtered	4690.21	Filtered	3521.43	Filtered	Filtered	9114.34	Filtered	Filtered
P23142	Fibulin-1	3495.48	1854.11	982.353	Filtered	19506.4	20484.2	6668.87	11426.6	6308.7	3531.75	2905.56	1792.55	5153.43	5631.83	12590.6	Filtered	6107.23	4729.64	Filtered	Filtered	13210.5	Filtered	5244.89	5774.84	21134.7	74246.3	2882.43	482707	9773.32	1977.02	1130.3	Filtered
P23193	Transcription elongation factor A protein 1	2026.27	1778.85	3406.65	Filtered	3943.93	Filtered	Filtered	Filtered	3467.03	3065.28	2067.72	3123.29	2244.99	2635.56	Filtered	Filtered	Filtered	Filtered	7785.49	Filtered	Filtered	Filtered	3018.86	4105.31	6713.09	Filtered	Filtered	Filtered	Filtered	3707.19	2985.08	Filtered
P23246	Splicing factor, proline- and glutamine-rich	2367.66	2112.11	2308.66	Filtered	1595.82	1159.12	Filtered	Filtered	20213.2	3138.86	1276.43	3164.57	4317.55	3335.07	Filtered	Filtered	Filtered	3917.83	6439.1	Filtered	Filtered	Filtered	1570.61	3049.43	2921.26	Filtered	Filtered	Filtered	Filtered	4027.27	1083.52	Filtered
P23280	Carbonic anhydrase 6	86179.2	100254	Filtered	Filtered	Filtered	Filtered	Filtered	2167.99	29659.3	27472.9	2693.2	6972.02	Filtered	Filtered	Filtered	5181.24	Filtered	Filtered	Filtered	Filtered	1317.76	Filtered	2989.68	2954.04	5456.14	25901.2	9004.46	162894	Filtered	Filtered	8175.74	18405.3
P23284	Peptidyl-prolyl cis-trans isomerase B	44938.5	51096.9	33973.4	42053	44193.9	40311.5	102029	119620	56005.7	74152.3	64833.8	71415.9	87878.2	94999.3	49238.4	49224.8	107612	92835.6	70353.4	239610	81996.3	122591	80041	116589	118805	816617	173202	866440	110181	113264	134655	107626
P23368	NAD-dependent malic enzyme, mitochondrial	Filtered	Filtered	198.305	Filtered	Filtered	Filtered	Filtered	Filtered	Filtered	Filtered	Filtered	Filtered	1794.63	4490.07	Filtered	Filtered	Filtered	3077.98	Filtered	Filtered	Filtered	Filtered	Filtered	Filtered	Filtered	Filtered	2256.93	Filtered	Filtered	3488.73	Filtered	Filtered
P23381	Tryptophan--tRNA ligase, cytoplasmic	12250.9	11225.6	13346.4	21161	23594.2	20641	25257.9	36160.8	17804.7	14072.8	18978	11602.4	246240	162754	43292	31329.5	15082.2	12948.7	6049.85	43079.5	22767.5	84337.6	204905	456475	16405.6	37337.9	78130.3	93986.4	57319.7	20958.4	93205.4	140553
P23396	40S ribosomal protein S3	27172.4	41578.1	29573.4	12475	28432.6	24312.8	18474.6	20898.1	17822.1	23463.5	26940.1	25356.1	21909.7	18503.7	20896.5	29652.3	19381	26605	44527	62285.7	65940.4	77294.6	40779.2	45156.7	69879.3	61900.6	52368.2	Filtered	23802.1	31844.8	18422.4	24002.2
P23526	Adenosylhomocysteinase	31742.1	37891.1	26789.2	21410.8	43846.2	52843.5	45459.7	52473.9	40683.2	54362.2	31764	41689.6	39082.8	46798.1	42182.6	36387.9	41147.6	45296.5	46434.4	47264.9	28465.5	35321.2	44146.9	34874.5	30558.7	38143.8	42480.1	41923.8	24713	22847.5	37746	28087.8
P23528	Cofilin-1	98909.9	124891	99039.6	151465	131376	98232.9	165091	181386	97900.4	123261	110576	142698	163718	135631	170854	165869	166401	148963	120476	125138	133954	111543	131076	143462	105269	87277.4	152403	245933	164370	153841	153919	124448
P23588	Eukaryotic translation initiation factor 4B	12041306	33814.3	12118.1	7433.07	2877.26	15369.6	Filtered	Filtered	16548.2	11895761	5437.35	18546	12374.5	10696.3	305914	Filtered	Filtered	36840	984787	Filtered	22314442	Filtered	Filtered	912.162	Filtered	Filtered	Filtered	20013.1	Filtered	6399.28	Filtered	Filtered
P23743	Diacylglycerol kinase alpha	2687.38	9008.47	3563.6	Filtered	3962.03	Filtered	Filtered	Filtered	6457.4	10786.6	12540.8	14916.8	2490.62	5696.7	Filtered	Filtered	Filtered	379.991	5835	Filtered	Filtered	Filtered	699.442	695.868	Filtered	Filtered	Filtered	Filtered	Filtered	6879.75	6844.05	6586.45
P24158	Myeloblastin	12367.4	3866.87	2308.44	Filtered	70367.6	52279	27188.2	55562.9	10158.2	25816.3	47712.1	8429.09	31677.7	10508.8	5536.37	7026	189530	188190	Filtered	Filtered	21808.9	Filtered	44943.2	13601.4	1910.36	Filtered	10558.1	Filtered	135022	75950	9283.44	Filtered
P24534	Elongation factor 1-beta	18903.7	18319.4	19125.7	22312.7	25647.9	26111.1	24056	22372.1	23655.1	20437.4	20349.7	12784.5	18925.7	19116.3	19885.5	17253.2	9891.82	18583.3	23690.8	27764.6	20687.5	29927.1	22883	20028.6	18714.5	12835.8	31053.9	20412.7	14628.6	15266.4	18250.1	16150.7
P24592	Insulin-like growth factor-binding protein 6	6532.69	5253.99	3411.81	Filtered	4656.59	6934.08	13390.4	16534.8	5012.08	6228.07	7317.42	3717.51	8489.04	1997.83	10183.7	7587.77	9512.66	5456.36	6603.28	Filtered	9796.35	21818.8	6412.69	7247.39	6835.37	32968.1	11849.4	30560.4	4195.34	6176.99	1114.22	2819.84
P24593	Insulin-like growth factor-binding protein 5	4396.42	Filtered	Filtered	Filtered	3250.99	Filtered	Filtered	15168.9	10254.3	31881.1	19475.4	33447.8	Filtered	Filtered	Filtered	19537.4	2246.78	Filtered	7868.74	49441.2	17775.9	20983	8849.4	Filtered	Filtered	Filtered	9198.51	Filtered	11782.1	16929.9	Filtered	5071.39
P24666	Low molecular weight phosphotyrosine protein phosphatase	21787.4	30766.9	13075.9	54661	13671.4	13944.1	30374.2	35188.4	14779.4	29320.5	23148.1	25954.5	28807	15937.5	62289.6	55774.2	20601.4	29040.1	26621.5	57653.4	25909.5	48106.7	9796.19	12679.6	22612.4	44606.7	35870.7	Filtered	20104.3	15432.5	16700.2	21943.3
P25311	Zinc-alpha-2-glycoprotein	3410058	6026863	2.89318e+06	12913861	5.35193e+06	4.93835e+06	13002942	18020602	3.80293e+06	6.22039e+06	7977241	4223358	2790348	1.7938e+06	10383713	10382230	16186957	13756743	8607171	39010512	12429764	27790242	2.42536e+06	2633848	9535165	35746216	13496970	64919936	13582153	8932798	2732889	6946692
P25325	3-mercaptopyruvate sulfurtransferase	8160.05	8094.28	8243.57	11766.2	7422.57	8543.4	9060.67	6892.36	5937.25	12144.4	11318.5	9720.4	9948.68	5860.13	9379.94	8246.24	12316.2	12753.5	15138.1	10184.4	9368.07	7146.22	8943.73	6337.01	7118.94	Filtered	8814.26	43952.2	13514.3	13664.1	7359	15756.5
P25398	40S ribosomal protein S12	30599.8	20898.1	34274.5	7847.02	31223.1	20967.5	15568.3	1882.63	34653.9	29620.8	14372.6	32154.9	34856.2	38978.9	7911.05	3647.67	19431.7	33800.4	63703	98744.2	34739.3	24320.6	41927	47679.5	61631.3	Filtered	44370.1	Filtered	15575.3	35087.8	36720.7	20774.9
P25685	DnaJ homolog subfamily B member 1	9120.28	6189.16	9321.54	9501.3	8253.17	11268.6	18644	12235.7	9954.61	5317.33	4478.13	7593.35	11118.3	9989.52	Filtered	5502.32	7533.43	18715	19386.3	Filtered	Filtered	Filtered	5183.34	Filtered	Filtered	Filtered	9644.34	Filtered	Filtered	11804.4	8965.24	14015.7
P25705	ATP synthase subunit alpha, mitochondrial	Filtered	Filtered	Filtered	Filtered	Filtered	Filtered	Filtered	Filtered	Filtered	Filtered	Filtered	Filtered	892.326	1518.11	Filtered	Filtered	Filtered	1007.28	Filtered	Filtered	Filtered	Filtered	Filtered	Filtered	1334.11	Filtered	Filtered	Filtered	Filtered	6229.47	6718.73	Filtered
P25774	Cathepsin S	4138.18	6082.75	8164.41	19505.8	12041.7	14400.9	11750.6	10852.2	4794.47	8352.43	12771.9	5323.91	20475.9	14820.3	30851.5	35985.9	11282.6	8901.75	11027.3	32576.4	15642.2	37771.4	9424.95	10394.3	24119.6	90662.6	20048.5	98497.3	24238.3	14551.9	21644.8	13967.6
P25786	Proteasome subunit alpha type-1	33651	33667.9	22824.4	32486.7	39263.7	38281.9	31463.7	47210.6	35878.6	34453.7	36567.9	43555.1	52110.1	46241.1	48231.2	47957.1	30905.5	28978	28669.3	25658.2	53689.5	42237.4	25412.8	38192.1	25114.1	Filtered	27932.4	36621.4	25733.4	40065	46184.6	45234.1
P25787	Proteasome subunit alpha type-2	7659.86	8514.32	7240.31	6896.27	6207.94	5969.57	10085.8	9755.46	8691.21	7150.31	14317.7	11062.4	11217.2	9993.69	15047.7	15304.3	15064.6	11501.4	13531.9	18541.2	14118.8	23016.6	9668.73	11922.1	10538.6	Filtered	15394.3	12147.8	10004.3	11151.9	12707.2	13316
P25788	Proteasome subunit alpha type-3	33762	45709.8	29958.8	37312.9	40768.8	41222.2	54404	52344.6	43776.1	40678.5	52625.4	46596.2	49868.1	45676	66649.2	62629.9	56206	53486.6	56121.5	50496.3	62338.8	63225	44887.7	49281.4	44663.9	28880.6	48371.2	56050.4	50200.3	42987.4	56659.9	65211.6
P25789	Proteasome subunit alpha type-4	21806	18012	19041.8	21500.8	21596.8	19558.6	32153.9	30064.2	20193.2	21885	27567.9	21247.8	34734.5	26925.5	31808.3	29366.4	25844	25806.5	30607.8	32888.2	33803	35983.3	21698.3	27795.5	30108.8	16040.5	32845.2	10612.2	28684.6	26495.6	27889.4	33409.1
P25815	Protein S100-P	433817	762938	836166	1.74548e+06	609894	447664	903191	1.31551e+06	693708	1.06366e+06	1.09093e+06	1.49226e+06	416891	477575	860653	885057	1.57359e+06	1.16875e+06	1.07171e+06	2474060	1.41815e+06	1.02529e+06	746236	726238	288253	400137	1.67027e+06	3444045	795631	610756	1.41876e+06	2266170
P26038	Moesin	15284.4	11698.4	36040.3	20146.7	30990.6	23430.3	48270.3	56591.1	28706.8	34905.6	38856.2	44769.3	43381.6	40975.7	4770.87	104423	53802.9	60670.5	32974.9	95309.3	50808.1	75153.9	31686.1	52185.6	43355	Filtered	70811.7	Filtered	5376.98	52224.3	36580.2	54310.3
P26045	Tyrosine-protein phosphatase non-receptor type 3	8981.16	10169.1	3284.51	29610.2	5542.36	9469.42	74322.7	36339.5	11738	14181	32208.4	10170.6	6773.66	698.68	65172.9	38049.4	8271.98	18304	9143.77	38125.2	29369.6	153370	Filtered	Filtered	12829.3	145570	15617	188663	24677	24212.8	4200.82	6557.35
P26373	60S ribosomal protein L13	11087.5	16024.9	18294.2	Filtered	17032.2	6129.86	71375.5	117944	9698.77	32690.8	Filtered	10345.1	10323.9	6856.23	28499.4	Filtered	14142.1	8514.49	24247.5	46197.4	49561.4	48142.4	13602.2	8086.38	35459.3	68549.7	33945.9	Filtered	Filtered	13952.5	5223.96	25095.2
P26447	Protein S100-A4	1.96523e+06	2.68681e+06	1.46525e+06	3007991	2.07519e+06	2193694	3.54794e+06	3.95447e+06	2.37642e+06	2.63509e+06	2.94336e+06	5.19152e+06	1.57065e+06	1.78693e+06	4798307	6.46128e+06	3.77388e+06	4602907	3623721	4503605	3.40063e+06	3.93295e+06	1545222	1011044	2203685	2.37641e+06	2.66538e+06	4.13006e+06	3.32859e+06	2.6569e+06	2.57468e+06	4.25551e+06
P26572	Alpha-1,3-mannosyl-glycoprotein 2-beta-N-acetylglucosaminyltransferase	Filtered	Filtered	Filtered	3727.01	1035.67	Filtered	Filtered	Filtered	Filtered	Filtered	Filtered	834.639	Filtered	Filtered	6062.74	14025.7	Filtered	Filtered	1062.05	9509.76	Filtered	Filtered	Filtered	Filtered	3143.72	Filtered	4996.8	Filtered	Filtered	Filtered	Filtered	Filtered
P26583	High mobility group protein B2	Filtered	1137.06	Filtered	Filtered	11561.1	9052.35	Filtered	Filtered	3500.78	6373.26	8912.87	3226.53	9806.17	9962.57	Filtered	Filtered	26241	31358.7	Filtered	Filtered	Filtered	Filtered	10848.8	12559.6	Filtered	Filtered	7706.22	Filtered	4314.47	3155.59	2977.17	Filtered
P26599	Polypyrimidine tract-binding protein 1	10369.3	7947.63	10079.6	8224.73	9613.63	6139.71	4244.67	9760.52	8456.53	10784.5	12378.5	8717.41	8325.68	9372	Filtered	4104.18	10480.4	13182.7	15342.1	14660.3	12431.2	11284	8489.63	10562.6	24242.8	17575.9	13053.4	Filtered	14358.8	14124.5	10408.2	9629.97
P26639	Threonine--tRNA ligase, cytoplasmic	13137.8	9997.85	9564.97	16541.2	19382.7	8793.01	10756.8	8931.62	10760.2	12685.8	10620.6	10192.9	13188.9	13807.3	13563.1	13866.5	15025.9	24467.8	7689.07	7383.96	14669.3	12252	15079.3	18420.9	6803.01	Filtered	11023.8	18748.9	14658.5	13758.5	10701.6	13412.3
P26641	Elongation factor 1-gamma	34630.5	31423.3	31199	34894.2	36808.2	36300	34409.2	37030.3	30169.5	39178.1	41173.2	31616.5	37311.1	37333.7	33926.6	28772	26553.8	32691.2	33366.6	56238.8	47285.5	35562.7	46283.4	37946.4	44557.3	Filtered	41775.4	38003.2	33792.7	44152.9	29687.7	30354.3
P26885	Peptidyl-prolyl cis-trans isomerase FKBP2	16962.4	19845.3	10466.9	9277.15	998.197	18176.5	39809	46192.6	24545.3	13365.2	17017	12090.9	20122.2	21599.9	Filtered	Filtered	34557.1	18887.7	9168.84	Filtered	17586.2	Filtered	28007	40355.6	35375.3	Filtered	22193.6	Filtered	39856.3	20857.6	40890.8	22837.5
P27169	Serum paraoxonase/arylesterase 1	44356	22860.8	4950.55	7587.86	21128.5	28964.3	19808.7	25327.3	26034.3	27018.4	7645.48	6483.43	18337.3	13864.1	Filtered	Filtered	10821.9	4346.17	3906.65	Filtered	23180	55913.4	47296.9	34816.6	61123.7	256161	18070.1	Filtered	19377.2	2501.95	24075	11124
P27348	14-3-3 protein theta	51345.3	75002.4	77225	97777.1	63717.9	61952.3	76060.1	59780.4	66967.4	56449.8	62514.9	82620.3	68068.4	48189.5	79790.9	71602.1	82627.4	63992.7	77855.1	338985	60451.1	493963	59770.5	51155.7	75295.8	109364	82366.4	296758	105005	70752.8	94195.8	98429.3
P27361	Mitogen-activated protein kinase 3	12925.8	13894.5	15398.7	25115	15244.9	14310.3	17340.9	18915.2	19113.8	16160.6	13824.4	20566.9	22286.3	17324.6	15905.9	12778.9	14348.9	15742	12011.1	7643.59	16241.6	31018.2	14390.1	10514.4	5663.54	7447.46	12698.1	13548.3	16041	13812.3	17351.5	20782.3
P27482	Calmodulin-like protein 3	23543.1	33537.1	139408	180513	22417.3	14589	80901.8	57304.4	29376.7	25645.7	24333.7	88210.9	39840.1	45280.8	63086.9	63592.7	76823.6	104004	128910	62639.6	57243.8	87974.6	61083.9	34602.6	67373	72445.7	25906	102223	101883	129143	131131	118017
P27635	60S ribosomal protein L10	4093.26	2234.35	6970.76	Filtered	Filtered	1836.03	Filtered	Filtered	4260.59	7484.17	1195.65	4471.35	8008.45	1158.57	16942.9	Filtered	Filtered	Filtered	6355.77	Filtered	4222.61	Filtered	5895.9	8979.25	9118.05	Filtered	Filtered	Filtered	Filtered	6554.15	5036.17	3693.03
P27694	Replication protein A 70 kDa DNA-binding subunit	295.363	Filtered	1060.55	Filtered	Filtered	Filtered	Filtered	Filtered	Filtered	Filtered	Filtered	Filtered	Filtered	761.473	Filtered	Filtered	Filtered	304.15	2146.6	Filtered	Filtered	Filtered	Filtered	Filtered	Filtered	Filtered	Filtered	Filtered	Filtered	Filtered	Filtered	Filtered
P27695	DNA-(apurinic or apyrimidinic site) lyase	12835.4	8853.71	8946.83	7269.61	10762.9	12067.8	2555.24	13487.7	6497.02	9120.37	5309.61	4936.19	6507.77	13615.4	Filtered	Filtered	13057.4	10735.6	17491.5	43484.2	22036.6	Filtered	13914	5404.66	32008.2	Filtered	22673.3	Filtered	11377.5	16188.5	19154.7	2654.35
P27701	CD82 antigen	19612.7	11500.6	2774.91	11381.1	159892	9391	Filtered	23720.4	4850.54	136736	12987.2	2206.69	5827.66	6737.11	27779.4	104145	17836.5	30048.8	18253.8	24133.3	164964	35418.1	Filtered	18284.9	72547.2	359285	64691.3	42479.2	21683.2	8467.03	7797.64	27565
P27797	Calreticulin	29944.6	38016.4	20202.2	3644.2	38503.6	30150.3	60441.8	53836.4	23678	34751.4	35736.5	25855.5	73664.3	68542.7	34797.9	37477.3	40672.7	51250.6	31472.8	67947.5	29619.6	21120.1	44551.1	60783	30906	65238.8	42551.5	83116.1	69538.1	67423.8	81044.1	53714.3
P27824	Calnexin	1425.48	5822.89	1457.79	Filtered	2545.13	Filtered	1866.31	Filtered	2817.27	2803.54	1965.52	1013.25	9777	17593.2	Filtered	Filtered	4864.55	4231.06	863.127	Filtered	Filtered	Filtered	3167.02	3651.79	2601.29	Filtered	4882.6	Filtered	Filtered	Filtered	2018.34	1978.71
P28062	Proteasome subunit beta type-8	15455.8	19542.4	19309.8	22619.6	19929.4	17476	16545.6	9881.15	23328.8	14363.9	27904.8	17869.9	26001.5	22995.1	41577	22592.2	34794	24352.2	24130.8	52620.3	22705.6	9672.25	32211.2	24995.9	10809	Filtered	19985.5	Filtered	13675.7	16810.6	29803	24974.2
P28065	Proteasome subunit beta type-9	35322.7	37686.7	26671.4	60349.2	39115.2	57645.1	66187.9	74497.8	38810.2	39799	52131.6	32391.8	94267.3	74922.8	92727.1	89862.6	33132.5	35949	31037.7	32205.1	76361.5	66993.8	56968.1	56841.3	48569.7	Filtered	73479.7	57639.3	51261	48623.8	73345.9	97051.6
P28066	Proteasome subunit alpha type-5	38526.4	47804.7	32328.5	30867.5	25332.6	25060.5	66669.5	52463	25460.2	20445	35671.3	31446.3	46979.3	44157.3	54520.4	49541.3	43478	41639.4	46971.3	75402.7	47296.2	54601.5	34707.5	30927.3	25174.3	50559.9	48635.2	63405.9	43020.7	39751.6	40494.4	52927.5
P28070	Proteasome subunit beta type-4	8247.46	16427.6	13106.7	15579.8	17076.7	21491.5	40333.2	38618.4	18666.9	16821.4	26653.9	18041.4	22769.7	19147.4	42551.7	17197.9	46669.3	14105.4	15437.7	Filtered	26236.6	13992.8	10655.5	16178	27630.4	Filtered	18334	Filtered	15743.3	19497.4	13931.2	16738.4
P28072	Proteasome subunit beta type-6	10849.3	15768.4	11284.9	9890.24	14436.8	4870.41	27064.1	27043.6	15498.8	9421.07	14310.8	23722.8	2575.79	Filtered	15127.8	Filtered	25048.6	23588.1	27191.4	11887.2	Filtered	Filtered	Filtered	Filtered	6568.82	Filtered	Filtered	Filtered	14418.3	19074.6	7860.62	5328.25
P28161	Glutathione S-transferase Mu 2	2617.89	2245.71	Filtered	Filtered	1691.84	1168.04	2823.32	Filtered	Filtered	1090.6	783.467	3585.79	1498.2	1740.22	4797.83	5347.66	1174.03	Filtered	367.114	3219.35	Filtered	Filtered	1045.78	804.777	2012.44	Filtered	2447.39	Filtered	Filtered	984.392	1008.37	950.474
P28325	Cystatin-D	2834.97	3751.65	Filtered	Filtered	Filtered	Filtered	Filtered	41448	6879.55	50801.6	Filtered	2915.74	Filtered	Filtered	Filtered	Filtered	Filtered	Filtered	7553.63	56562.1	75388.9	118124	27208.7	Filtered	5327.51	501490	17951.9	233279	Filtered	Filtered	Filtered	Filtered
P28482	Mitogen-activated protein kinase 1	23241.6	27616.3	23371.5	24470.1	24100.2	26054.1	31270.6	28358.9	28484.5	38391.9	27893.2	31648.1	25037.7	27703.8	29475.8	29838.3	32629	39333.6	35426.9	20833.3	23920.8	Filtered	30421.7	30380.1	24003.5	Filtered	36054.6	36995.7	29021.3	29926.6	27111	30674.9
P28676	Grancalcin	1491.91	Filtered	554.004	Filtered	Filtered	Filtered	Filtered	Filtered	564.552	Filtered	Filtered	Filtered	1205.97	2071.91	Filtered	Filtered	3528.95	3894.04	Filtered	Filtered	Filtered	Filtered	2135.03	711.573	Filtered	Filtered	Filtered	Filtered	1745.97	3201.47	970.609	Filtered
P28799	Granulins	6202.01	12492.8	11099.3	24638.5	14024.5	11226.2	20161.1	11459.4	5643.35	8457.71	28134	14882.4	14299.1	12102.6	27511.6	51838.8	20388.8	14664.7	24646.9	85195.4	49465.4	74807.4	8295.57	14365.9	42265.7	100893	36806	288823	49479.4	23850.2	14681.8	12876.2
P28838	Cytosol aminopeptidase	19397.2	37922.1	47007.6	82093.3	65801.1	55811.7	67549.7	56230.3	44626.6	62116.8	74459.3	63816.6	561377	360828	103003	109180	59577.3	61125.7	69116	26528.3	165274	145212	253282	208568	45241.3	19522.8	189282	151709	32306.5	34385.2	185386	228321
P29034	Protein S100-A2	2853.06	339.036	3762.98	10283.3	Filtered	Filtered	Filtered	Filtered	6780.87	Filtered	Filtered	Filtered	Filtered	Filtered	Filtered	Filtered	Filtered	4797.81	Filtered	Filtered	Filtered	Filtered	20926.7	19463.3	Filtered	Filtered	Filtered	Filtered	Filtered	7665.26	21346.1	8409.09
P29144	Tripeptidyl-peptidase 2	5732.64	5257.44	2408.67	Filtered	12417.1	7826.92	Filtered	Filtered	Filtered	3826.44	2201.44	3623.5	2366.51	Filtered	43522.3	35571.2	Filtered	1069.93	5217.52	Filtered	Filtered	Filtered	Filtered	12774.8	13892.4	Filtered	Filtered	Filtered	Filtered	Filtered	Filtered	Filtered
P29218	Inositol monophosphatase 1	16612.1	22017.3	18950.7	32112.9	23912.2	27504.6	37876.5	34022.5	19792.8	17316.9	31866.9	19618.6	34501.8	32754.2	31953	40482.1	27042.8	28007.7	24679.9	52106	58683.7	20412.1	15620.2	15809.7	17133.4	Filtered	30423.2	114469	20100.9	20217.1	29648.8	31735
P29350	Tyrosine-protein phosphatase non-receptor type 6	3934.08	2403.42	2270.79	4751.59	6164.59	3487.81	2315.5	Filtered	2250.11	4192.52	9789.08	5158.05	10614.3	11514.8	Filtered	Filtered	7511.39	4250.3	6705.96	Filtered	17851	Filtered	9459.54	9120.25	Filtered	Filtered	24394.3	Filtered	4663.58	7271.57	4862.26	6041.07
P29373	Cellular retinoic acid-binding protein 2	7115.1	9074.2	5243.92	8917.58	9856.45	13086.5	8607.26	10409	20388.4	24764.2	14229.8	16276.3	5495.41	3224.69	1497.21	1747.27	20352.7	14946.2	3444.66	16015.6	23150	12248	5901.84	7812.66	3305.97	Filtered	9345.61	15660.2	10650.6	8532.74	8677.07	10556.8
P29401	Transketolase	60750	79461.6	75092.6	108609	73903.1	73445.7	133864	130229	54466.3	66356.3	81148.8	55449.3	75621	80989.8	85753.4	67067.7	153510	151637	154683	111599	136399	144310	93842.4	62576.5	155607	100118	93937.9	44972.1	191853	120715	132862	71464.1
P29466	Caspase-1	5576.56	5863.28	5454.47	7404.79	6661.94	4421.46	7844.74	5535.75	7953.35	7475.87	5694.82	5506.28	18294.2	16734.2	11215.3	11005.7	4238.33	3004.25	6537.92	Filtered	Filtered	Filtered	10840	12071.1	5183.76	Filtered	11672.9	Filtered	3811.53	6460.48	6785.25	6896.47
P29508	Serpin B3	24037.2	11277.8	6692.74	50336.8	73788.5	50373.8	17324.3	30614.8	78823	121744	28526	6564.56	7135.32	149927	Filtered	Filtered	13419.4	11828.7	6047.28	22588.9	Filtered	Filtered	26294.3	6956.88	38100.8	Filtered	Filtered	34536.6	45735.9	18313	14866.2	128282
P29622	Kallistatin	14635.3	29534.1	4155.53	31250.9	6742.23	11991.7	61580.4	63432.4	40646.6	40080.9	4258.38	18198.4	7887.58	10438.7	Filtered	142353	13863.4	6057.11	3806.97	Filtered	54294.3	23777	23641.4	18789	125600	52200.9	11864.8	Filtered	7785	22762.4	3514.5	49372.9
P29692	Elongation factor 1-delta	21051.8	16883.2	24631.4	19335.6	17929.3	16675.9	21867.3	19955.6	16534.8	21477.3	19709	13424.1	22845.5	14968.8	22522.8	18342	21436.2	19531	27156	15174	27886.5	12219.8	39655.3	22211.9	34925.4	14085.6	26253.1	21269.9	25726.5	38463.4	20175.3	13050.8
P29966	Myristoylated alanine-rich C-kinase substrate	6288.28	8795.22	10793	14376.8	4746.96	6411.55	17874.9	22003.8	11392.8	20112	10769.1	16606	7155.04	8260.31	9916.78	12766.4	6806.44	12173.1	20393	30568	14706.1	21998	9371.03	7010.08	11149.5	Filtered	9629.04	Filtered	9991.35	12059.2	9770.48	15335.6
P30040	Endoplasmic reticulum resident protein 29	13655	17754.9	13986.7	4576.12	14721	10809.8	31565.9	31774.2	13244.8	20062.3	11650.2	10396.9	37159.3	44566.7	10305.9	9548.57	23574.2	27340.2	13208.7	14549.6	12671.9	24401.6	45092.6	39043.6	22268.4	6894.85	26907.4	15063.1	32446.9	28744	67747.3	25633.9
P30041	Peroxiredoxin-6	448870	472292	272143	269919	579719	565078	772875	663866	437402	493707	395544	644329	759776	654491	866144	897354	620008	584629	532779	448739	587322	596334	311492	318854	407615	407549	505239	562935	508626	253136	386144	259399
P30042	ES1 protein homolog, mitochondrial	Filtered	Filtered	2020.82	Filtered	Filtered	Filtered	2097.56	Filtered	1870.84	2413.24	Filtered	801.69	3554.52	11184.6	Filtered	Filtered	5408.96	6884.97	3880.99	Filtered	6428.53	Filtered	8564.78	Filtered	12650	Filtered	4548.49	Filtered	Filtered	4032.13	11485.9	Filtered
P30043	Flavin reductase (NADPH)	37483.7	37565.6	26697.6	55504.1	37333.6	36503.7	82577.3	77692	29523.1	43760.7	26780.8	75043.1	52912.1	33341.3	121768	130669	75860.3	51365.3	80992.5	88087.2	63247.2	63455.4	27825.1	21150.1	31811.8	38934.5	65593	16664.7	103900	68225.4	34968.2	52657
P30044	Peroxiredoxin-5, mitochondrial	401133	502032	512575	1.01239e+06	527967	500537	822697	900786	480571	517478	664647	614639	604181	495064	1.28231e+06	1.18601e+06	855720	894098	862105	799784	645313	812778	365566	308619	579606	469532	595011	837266	768990	696537	760727	884564
P30046	D-dopachrome decarboxylase	18175	22176.7	14310.9	24375.3	22094.8	22769.8	40165.1	31557.1	20373.7	18044	24523.5	32603.8	19116.9	20404.3	22907.1	37312.9	21727.8	24387.8	17562.5	26712.1	25196.4	33156.6	19868.5	11803.9	12494.8	Filtered	19126.4	37971.3	21711.9	15141.4	26068.7	26702.6
P30047	GTP cyclohydrolase 1 feedback regulatory protein	3076.72	8261.9	1475.78	Filtered	5120.14	7963.66	14241.6	Filtered	3672.49	5987.94	Filtered	5356.05	Filtered	3472.16	Filtered	Filtered	3161.22	554.086	Filtered	Filtered	Filtered	Filtered	880.621	Filtered	Filtered	Filtered	Filtered	Filtered	Filtered	Filtered	3563.99	Filtered
P30048	Thioredoxin-dependent peroxide reductase, mitochondrial	20215.9	22744.5	32037.2	7429.98	25360.2	19760.6	37160.5	45243.1	17818.7	31613.6	16208.7	17082.1	48324	39922.7	9281.9	6914.77	45006	51211.2	35244.9	47504.6	25362.3	29865.3	34751.2	35409.6	58462.5	117397	34491.8	27674	42232.4	54079	63474	18990.3
P30050	60S ribosomal protein L12	16246.7	15180.5	20653.2	6636.71	14954.9	12928.5	11190.3	14449	18055.4	16395.6	13780.7	15177.7	19196.5	19588.2	8364.99	6916.6	14049.3	18772.1	28835.2	10398	29154	18501.2	23557.6	31931.7	50640.8	32117.8	19104.5	Filtered	15511.1	27076.2	25200.1	13856.5
P30084	Enoyl-CoA hydratase, mitochondrial	5483.57	5306.32	15682	3418.19	9814.55	8923.92	15987.8	13978.1	8588.93	8423.49	10192.4	7439.66	23661.7	28540.7	7312.6	Filtered	15789.4	20860.2	23458.2	13175.1	20777.5	22926.8	16154.2	24493.2	31315.6	Filtered	21301.6	Filtered	21984.2	27297.1	49242.4	11153
P30085	UMP-CMP kinase	142243	169209	140709	198438	161226	162398	198938	230503	110428	144209	185704	181502	120236	117858	280608	245352	177291	183837	200685	196546	179366	178452	145363	113144	105347	134105	164724	218829	238593	181834	188374	197782
P30086	Phosphatidylethanolamine-binding protein 1	277405	364003	237757	356725	316016	273200	492866	433853	333998	392537	336922	468909	301019	254779	665456	697674	406207	361403	372144	558145	348879	433546	155775	162762	316373	388299	286621	543327	383784	274124	212682	317775
P30101	Protein disulfide-isomerase A3	101377	101048	74380	28026.8	88664.7	78375.8	167744	183512	97593.6	95427.2	100587	83314	224233	200045	138233	144873	153264	125856	75984.9	128781	83200.9	82257.8	139560	188345	114543	132269	141037	226065	200434	222627	292032	128474
P30153	Serine/threonine-protein phosphatase 2A 65 kDa regulatory subunit A alpha isoform	37677.1	48973.6	42417.1	52710.5	36377.2	30907.6	33970.6	30315.2	41837.1	33621.6	33829.4	60391.4	44717.3	47406.7	52385.9	59410.9	32327.7	46172.2	53360.6	62857.1	55171.1	38605.2	49054.3	50487.6	30404.5	Filtered	43783.8	59266.9	34024.9	45780.5	37425	53849.2
P30419	Glycylpeptide N-tetradecanoyltransferase 1	568.339	Filtered	1828.75	2015.96	1289.66	Filtered	Filtered	Filtered	1243.52	2902.5	2769.91	5007.04	7290.97	5546.25	Filtered	Filtered	1091.97	213426	2129.71	Filtered	Filtered	Filtered	2393.38	2639.94	3363.99	Filtered	Filtered	Filtered	Filtered	1077.29	1246.02	Filtered
P30499;Q29865;Q29963	HLA class I histocompatibility antigen, Cw-1 alpha chain;HLA class I histocompatibility antigen, Cw-18 alpha chain;HLA class I histocompatibility antigen, Cw-6 alpha chain	Filtered	Filtered	1922.01	6329.49	Filtered	Filtered	8385.77	Filtered	6704.98	1479.06	Filtered	Filtered	8259.91	6424.79	33998.1	24746.8	Filtered	Filtered	Filtered	13698.4	13216.1	43708	Filtered	7583.85	10192.8	81932.6	Filtered	26900.9	Filtered	Filtered	Filtered	Filtered
P30520	Adenylosuccinate synthetase isozyme 2	8579.29	20316.3	15704.7	31477.8	21415.3	29800.2	29446	31188.9	26203	32460.5	25501.3	29816.4	31707.3	22700.2	36809.4	37460.2	33351.5	33592.9	25941.2	31342.9	12952.7	19300.8	17840.2	16914.6	8067.49	Filtered	11295	31245.2	23449.5	16870.1	19363.6	18203.7
P30626	Sorcin	9082.24	9852.52	5669.65	Filtered	10770.8	13042.8	14697.5	18537.9	10662.3	11742.8	17273.3	15251.9	14078.1	10029.7	26825	22759	21844.3	21141.2	7214.07	Filtered	23957.9	16704.6	9985.59	12475.7	9725.24	Filtered	18187.3	Filtered	17296	11606.9	13396.6	14940.4
P30711	Glutathione S-transferase theta-1	57091.3	222118	22743.6	189829	177132	178054	293102	56642.2	67778.3	139764	611558	38829.5	241631	216025	3.11535e+06	1.03754e+06	98258.9	78566.1	83956.7	31421.2	1323217	7.6719e+06	343026	369811	388147	6.03712e+06	Filtered	3.69427e+06	486610	287943	154778	192095
P30740	Leukocyte elastase inhibitor	348088	402297	454718	946538	579465	538704	424053	383712	608656	654375	675450	345009	463069	590413	1.06624e+06	797718	533460	858781	267338	290925	1.05859e+06	1153947	1.21241e+06	835241	299880	674565	605845	857983	663455	835272	624654	497067
P30838	Aldehyde dehydrogenase, dimeric NADP-preferring	351540	525366	676464	911376	453156	489334	880474	588038	507796	269112	438341	479589	798727	765941	592040	312736	237274	527265	1.24068e+06	466094	1.2768e+06	1.54838e+06	570718	292967	909281	889789	330044	611083	934225	1.1222e+06	782712	505457
P31025	Lipocalin-1	53985196	149920832	27974564	281342464	53512504	50319604	225218064	243742912	71818968	153817280	93210096	41697452	33867296	26032384	221645392	331252448	103917656	73382288	67824000	429780928	417373120	810157632	23326884	21325690	266306640	1964804480	244027152	1835384704	217564624	105257912	25791220	100623592
P31146	Coronin-1A	4863.26	3352.18	3075.59	Filtered	16430.7	16065.9	Filtered	3773.33	7505.46	14263.8	23989.2	2750.08	33449	29166.7	8816.71	6009.2	20863.5	31171.6	Filtered	Filtered	14518.9	Filtered	29786.5	66437.8	14812.2	Filtered	38633.1	Filtered	18737.2	14046.4	7787.25	10767.9
P31150	Rab GDP dissociation inhibitor alpha	94099.6	115964	103490	119952	106232	136377	222599	179887	121861	125906	119293	145407	146410	149775	184013	169854	149332	166467	139113	121834	186130	154984	140020	134986	108058	130933	144021	83498.2	145340	134428	162776	111317
P31153	S-adenosylmethionine synthase isoform type-2	15594.8	19300.6	23173.5	106325	279925	18827	22136.7	132120	12463	42393.2	34343.9	34753.6	17382.4	22920.9	21735.9	25546.6	20783.9	35850.9	35526.4	47173.4	60002.4	Filtered	17690	157143	19493.7	301060	15499.3	9035.67	10650.6	10133.1	40048.5	17717.5
P31483;Q01085	Nucleolysin TIA-1 isoform p40;Nucleolysin TIAR	5226.79	4671.03	5868.29	2712.09	4977.23	2805.44	Filtered	6345.63	4715.45	6873.73	4976.23	5421.66	6197.19	2158.46	Filtered	Filtered	Filtered	7777.13	7395.02	Filtered	Filtered	Filtered	4647.68	2625.98	9568.54	Filtered	Filtered	Filtered	Filtered	4099.46	3491.37	3671.16
P31689	DnaJ homolog subfamily A member 1	Filtered	Filtered	3507.36	Filtered	1924.01	6211.37	Filtered	Filtered	Filtered	Filtered	2010.37	Filtered	8643.29	6468.53	Filtered	Filtered	3228.36	4051.94	5344.14	Filtered	Filtered	Filtered	Filtered	Filtered	Filtered	Filtered	Filtered	Filtered	Filtered	Filtered	3785.22	9838.57
P31749	RAC-alpha serine/threonine-protein kinase	Filtered	470.648	1064.04	Filtered	946.45	Filtered	Filtered	Filtered	1518.53	Filtered	Filtered	Filtered	1109.99	1194.61	Filtered	Filtered	2416.67	2806.89	1113.94	Filtered	Filtered	Filtered	1189.07	985.599	Filtered	Filtered	Filtered	2882.72	Filtered	990.173	Filtered	Filtered
P31937	3-hydroxyisobutyrate dehydrogenase, mitochondrial	1759.55	3498.73	7225.05	Filtered	Filtered	3095.5	Filtered	Filtered	2859.13	2797.24	Filtered	4857.93	10330.3	10841.8	Filtered	Filtered	3650.66	9561.99	10369.3	Filtered	6646.54	Filtered	Filtered	2744.4	14811	Filtered	8325.44	Filtered	Filtered	6038.14	3714.54	Filtered
P31939	Bifunctional purine biosynthesis protein PURH	23555.6	32033.7	19199.5	30127.2	22536.3	21965	43010.8	53563.4	29025.4	40539.3	39508.5	33094.7	30647.4	33093.8	39294.8	37780	21150.6	20186.9	38071.6	43982.3	25818.2	30977.5	26550.1	29951.8	23367	Filtered	35137	105205	28767.6	21303.8	33029	37851.8
P31941	Probable DNA dC->dU-editing enzyme APOBEC-3A	74533.1	91416.1	236598	325336	69750.2	54575.9	133212	103310	89723	76372.6	89596.7	29513.3	238932	292672	34410.7	30851.7	85278.1	259208	194701	29651	319603	193559	225622	187385	163157	76555.3	174196	292613	322600	240670	392265	234714
P31943	Heterogeneous nuclear ribonucleoprotein H	22998.6	16939.4	19334.9	17249.3	30925.5	16037.6	12884.5	16542.1	29430.3	26810.3	15155.6	16332.4	29617.7	19885	14547.8	Filtered	24419.3	16635.8	42429.6	41225.3	27910.7	6078.27	26358.5	15649.9	31282.3	Filtered	23181.3	Filtered	22053.4	31671.5	15967.1	8836.79
P31944	Caspase-14	3203.74	5462.96	6560.78	19282.2	5306.8	3812.93	17136.7	20084.2	22648.3	7940.42	13157.9	699.366	5844.37	5850.73	11454.1	24008.3	4644.85	2272.67	9986.89	22247	Filtered	Filtered	5855.38	7860.24	25813.9	22799.6	Filtered	76295.9	22778.8	6501.4	5771.18	130266
P31946	14-3-3 protein beta/alpha	493356	431583	319334	817957	304373	248583	713980	673983	281931	342496	396508	630065	713830	452082	688809	538053	449099	607849	381724	525414	546530	1.07985e+06	509014	404821	356279	868266	652344	779297	839565	554344	627884	612521
P31947	14-3-3 protein sigma	59078.9	86434.8	120280	166953	78218.5	66396	164916	185624	78440	67482.5	96580.4	82254.3	119949	124309	93799.5	80803.6	121856	195217	225833	125597	190144	207996	107728	129351	76290.5	115412	137363	243685	190437	240210	236542	161854
P31948	Stress-induced-phosphoprotein 1	23294.9	24661.5	27185.1	33502.1	30611	26353.5	20130.7	24890.4	30567.4	31646.3	26534.9	27174.6	35332.6	29667.2	32151.2	25203.7	24432.2	31863.9	36682.6	29527.3	31836.1	25060.2	26626	29756.2	25117.7	32740.4	31506.8	38290.5	28354.1	26991.7	25361.2	26030.5
P31949	Protein S100-A11	324054	374373	245322	304139	275521	280769	613394	524672	242234	288175	403496	525705	427229	338460	772127	706462	630318	405281	529721	497550	479224	724702	417245	319486	170426	296865	512646	684729	408121	358025	348639	512248
P32119	Peroxiredoxin-2	135942	162781	95656.2	196814	104899	113798	268504	248038	104429	141723	102681	226932	112462	95572.4	182961	181547	190696	193324	131192	182286	135512	252725	72968.6	67812.8	104858	222081	153516	728959	170980	111749	158737	154042
P32320	Cytidine deaminase	Filtered	Filtered	Filtered	Filtered	16296.4	14145	Filtered	Filtered	Filtered	Filtered	Filtered	Filtered	1465.44	Filtered	Filtered	Filtered	24795.4	23120.9	Filtered	Filtered	Filtered	Filtered	4210.49	1872.78	Filtered	Filtered	Filtered	Filtered	10530.4	6304.33	Filtered	Filtered
P32455	Interferon-induced guanylate-binding protein 1	6747.93	3560.33	4603.66	5702.32	7238.82	5036.11	14295.4	6893.53	2928.77	8055.91	6004.21	12953.5	26877.9	20546.7	19702.2	13471.7	1430.11	5064.04	2788.6	3268.98	8344.99	24619	26380.9	52458.5	3225.71	Filtered	26896.2	10900.2	20148.5	9627.29	12390.9	20600.3
P32456	Interferon-induced guanylate-binding protein 2	4928.08	8077.34	5552.29	11321.9	5259.29	7828.88	1380.81	Filtered	6070.09	4883.29	5854.39	10728.5	31263.4	33754.5	Filtered	Filtered	Filtered	3104.1	Filtered	4672.94	Filtered	Filtered	14920.9	25971	Filtered	Filtered	5235.13	Filtered	1782.26	4983.14	6839.05	23833.6
P33176	Kinesin-1 heavy chain	3666.78	6091.61	5167.55	6876.65	4704.81	7440.51	Filtered	Filtered	5151.96	4106.84	9099.05	7675.5	3144.45	3986.3	Filtered	Filtered	6488.87	3851	6043.11	Filtered	Filtered	Filtered	4386.43	3690.44	13221.9	Filtered	Filtered	Filtered	Filtered	6403.38	2888.6	2666.33
P33241	Lymphocyte-specific protein 1	2759.92	14260.4	18563.5	22454.9	16384.8	8837.27	8857.35	9323.81	36256.8	9354.34	5697.65	13579.7	12078	14603.3	3848.6	9902.19	10214.6	6470.5	Filtered	Filtered	2857.75	Filtered	27034	20372.8	16556.9	Filtered	10782.7	Filtered	7389.76	32607.1	19262.6	34042.4
P33908	Mannosyl-oligosaccharide 1,2-alpha-mannosidase IA	981.254	4837.54	838.722	8872.86	1940.13	1336.25	10214	8876.35	1209.64	2698.25	8400.43	3621.22	549.192	718.784	Filtered	Filtered	3506.63	1725.89	Filtered	Filtered	Filtered	Filtered	Filtered	124.956	6678.35	6179.62	Filtered	44310.7	2814.18	1462.93	347.668	2805.95
P34096	Ribonuclease 4	28489.9	41445.7	12047.9	56103.2	60728.1	54328.3	95271.7	107746	35196.1	45469	157753	50684	48059.2	30229.3	202502	209541	96136	54731.8	67409.2	360497	136082	272847	32646.7	42758.4	123597	518824	90817.1	795405	100951	99336.1	21685.9	58312.3
P34896	Serine hydroxymethyltransferase, cytosolic	16961.5	27663.9	19598.9	45868	17551.2	20935.2	42134.5	26916.6	22933	20448.4	34803.1	52054.7	12288.5	14575.8	51337.4	59956.4	36704.2	31350.3	29981.8	27310.3	21833.6	9587.88	5907.04	6760.19	11819	Filtered	16126.2	47662.6	41898.9	33654.8	21355.8	27231
P34913	Bifunctional epoxide hydrolase 2	4719.33	5851.13	4951.41	7624.44	4231.54	4829.47	5745.91	1074.36	7598.6	13553.5	7784.39	8595.67	4568.22	4060.55	2265.06	4487	5024.19	8327.71	8519.44	2899.89	2065.34	Filtered	3887.87	5105.57	3284.04	Filtered	2275.76	Filtered	6547.41	10710.7	3496.36	2208.76
P34932	Heat shock 70 kDa protein 4	17475.9	22209.2	16376.7	27084.1	12585.1	13515.6	16897.5	19804.5	17165.3	23211.2	26161.3	21282.3	22190.5	20144.7	20245.7	15559.3	25349.8	23305	29719.6	20498.1	23572.1	21771.6	25550.7	20996.7	17599	Filtered	23649.7	Filtered	20999.2	25082.6	15584.5	18485.2
P34949	Mannose-6-phosphate isomerase	3215.44	6252.36	5445.67	7402.7	7565.36	6829.15	9354.3	9583.02	6896.16	4564.29	5045.46	6102.55	6764.74	2865.82	8343.12	6840.41	6140.09	6909.54	7028.43	16920.9	14591.5	Filtered	4578.29	5051.95	1938.48	Filtered	7612.29	Filtered	9811.1	5269.42	6426.43	6660.3
P35080	Profilin-2	24893	35821.3	16101.5	Filtered	Filtered	19840.2	Filtered	Filtered	40897.5	Filtered	Filtered	40392.5	15992.4	Filtered	Filtered	Filtered	24767.2	Filtered	Filtered	Filtered	Filtered	Filtered	21424.5	Filtered	Filtered	Filtered	29409	Filtered	Filtered	Filtered	23036.3	33700.4
P35219	Carbonic anhydrase-related protein	7320.35	4011.06	1865.28	Filtered	8206.58	6201.51	2399.22	7231.19	5736.48	8342.36	9174.53	9756.11	7064.24	5560.21	16642.8	14274.8	7408.12	4060.42	2994.02	11408	Filtered	Filtered	1225.11	2196.86	5596.49	Filtered	3515.47	Filtered	3015.73	2627.26	3130.24	4896.96
P35221	Catenin alpha-1	14124.1	12700.3	12315.6	8581.92	9807.08	5070.29	5554.33	Filtered	9256.04	13474.2	5470.06	11449.8	11023.6	3669.9	Filtered	Filtered	11439.9	13498.5	14100.3	7758.45	9623.93	8308.61	7700.15	6632.33	24568.4	Filtered	7625.81	Filtered	19154	14053.6	11517.8	3838.24
P35222	Catenin beta-1	7520.83	8305.15	6339.91	Filtered	4714.18	4102.8	6347.45	Filtered	5313.25	5000.01	3652.13	17157.1	19311	10981.9	Filtered	Filtered	Filtered	7437.04	6069.9	Filtered	Filtered	Filtered	1932.35	Filtered	12513.4	Filtered	Filtered	Filtered	Filtered	3633.76	5519.78	Filtered
P35237	Serpin B6	22052.4	25414.4	15296	24012.8	15548.5	23723.8	42797.2	36388.4	19025.2	29836.4	31181	33991.5	8773.61	6335.05	14944.5	64083.4	24301	23466.9	14798.8	41959.7	56890	Filtered	12363.6	16644.2	26617.9	Filtered	25309.1	79915.2	31333.3	23887.7	17827.7	22958
P35241	Radixin	180288	198086	193178	312742	226356	214384	376892	353671	211779	221716	192054	161006	297619	261127	360781	291915	224038	267276	191109	242057	211155	245186	245344	222055	177521	248027	236252	223607	253906	299579	346027	283647
P35244	Replication protein A 14 kDa subunit	1805.8	12732	1725.27	Filtered	424.172	Filtered	Filtered	Filtered	Filtered	2431.14	872.823	1332.29	1349.87	3364.31	Filtered	Filtered	492.563	1792.21	4722.87	Filtered	Filtered	Filtered	3913.19	1138.99	3147.12	Filtered	Filtered	Filtered	481.827	3012.54	3229.25	1473.08
P35268	60S ribosomal protein L22	8332.93	Filtered	15418.3	Filtered	17098.4	18034.5	Filtered	Filtered	2054.7	5603.12	Filtered	12857.6	10787	10949.6	Filtered	Filtered	12386.9	9599.61	34097.9	Filtered	60058.6	Filtered	39645.8	37610.9	41737.8	Filtered	32356.4	Filtered	Filtered	12934.8	16136.7	14785.5
P35270	Sepiapterin reductase	1444.78	1959.05	6583.76	Filtered	892.644	Filtered	Filtered	3021.91	4042.9	2453.12	Filtered	8600.2	Filtered	2237.88	Filtered	4016	1645.25	742.647	3766.21	Filtered	Filtered	Filtered	937.386	1536.63	Filtered	Filtered	Filtered	Filtered	Filtered	Filtered	3589.26	1644.91
P35321	Cornifin-A	16440.7	58096.7	33504	125511	31873.7	51355.9	26838.4	64683.8	23637.1	27263.5	26717.8	35197.4	28401.7	830.222	Filtered	Filtered	85155.5	139834	5579.82	Filtered	39198.5	Filtered	30638.5	34187.2	12920.4	64828.7	22713.5	126259	54685.6	53554.1	31789.8	25520.1
P35326	Small proline-rich protein 2A	5937.12	10354.2	44601.3	62154.8	14018.4	18412.1	12742.1	15996.7	6217.01	4921.06	10946.2	21596.3	17827.6	16354	Filtered	Filtered	56399.1	101879	4249.67	Filtered	20059.4	11621.3	8386.96	6576.26	Filtered	Filtered	9878.08	Filtered	73108.1	113985	21171.1	7830.33
P35527	Keratin, type I cytoskeletal 9	19164.8	16464.8	6483.21	98754.3	35097.8	37988.4	91032.1	79757	45750.7	30911.6	7621.65	Filtered	3511.39	7514.72	29297.3	74450.9	12404.4	7065.76	5448.4	Filtered	15834.8	61528.6	7996.52	Filtered	19724	129651	19174.3	85783.8	16053.5	Filtered	440.683	18931
P35542	Serum amyloid A-4 protein	77994	35202.9	10565.9	Filtered	35321.6	81491	Filtered	4126.32	86442	56619.1	4957.7	4727.39	11486.1	7187	Filtered	Filtered	20744.3	Filtered	Filtered	Filtered	Filtered	28411.9	121310	61479.6	78990.8	204171	49171.2	Filtered	Filtered	Filtered	51981.6	74826.3
P35573	Glycogen debranching enzyme	3367.76	4473.72	4300.1	3790.95	2836.93	3078.51	6959.68	6587.86	3181.86	3474.56	6986.57	3574.47	4040.78	3896.85	3070.52	6384.35	3792.27	4593.91	6992.16	11092.8	4342.33	Filtered	2962.3	1106.79	2960.51	Filtered	4438.46	2830.35	2038.56	4237.22	5442.7	2862.5
P35579	Myosin-9	44763.7	50980.3	17130.8	45659	47704.7	57421.6	46771.2	31727.7	51649.9	67897.8	62460.1	47065.5	22753.1	29593.6	49544.8	36458	39108.7	39355.2	40749.9	63377.4	45129.1	37787.8	34128.2	21116.4	44887.6	62527.3	46387.1	63163.3	36008.7	35178.5	22607.1	54322.6
P35580	Myosin-10	24846.7	39956.2	13412.1	26012.2	32162.3	26607.2	21689.4	26745.1	36248.6	34063.5	42864.5	31963	33341	26169.1	60981.2	57813	65163.3	42721.3	28331.7	33907.7	42903.7	26912.6	29214.8	29176.3	30915.7	Filtered	54765.7	47520.1	19268.3	26116.2	9217.18	23791.3
P35606	Coatomer subunit beta'	9935.46	11995.8	13145.9	12065.5	10519	13633.9	12963.5	13557.4	8752.64	7382.21	10227.7	8728.02	9947.7	8163.24	10927.8	11371.5	15141.4	14424.8	19994.2	16214.4	11503.7	2777.5	9424.1	11025.8	19893.7	Filtered	10334.1	6798.67	17848.7	19377.7	9697.5	10139.9
P35754	Glutaredoxin-1	18079.6	35654.3	29303.8	69020.6	30702.8	28753.4	39078.7	43937.4	36525.9	39831.6	41699.3	34494.9	49231.4	30307.5	40570.1	59674.6	39357.7	25789.2	26869.4	48053.7	29168.7	51400.6	40383.8	28593.7	23916	53464.2	41480.8	73550.9	65471.6	52524.8	41650.2	49073.7
P35813	Protein phosphatase 1A	20885	5427.09	5837.28	19269.2	4810.1	5054.1	28664.7	5103.92	6756.21	4837.65	9231.62	8063.48	6751.39	6793.7	18484.8	Filtered	10551.4	10217.3	6707.07	Filtered	Filtered	Filtered	4864.12	6162.22	Filtered	Filtered	9686.06	Filtered	2737.93	5445.69	4118.67	11543.2
P35858	Insulin-like growth factor-binding protein complex acid labile subunit	24818.2	15665.5	4679.93	Filtered	15011.4	14251.5	12099.9	12509.4	18969.6	15126.7	3999.5	5459.98	7397.68	9430.82	Filtered	Filtered	11713.6	4466.27	Filtered	6523.07	7572.48	10883.4	28729.2	17733.1	18945.7	59504.7	8988.86	Filtered	12527.5	5862.87	19767.9	6966.22
P35908	Keratin, type II cytoskeletal 2 epidermal	664.046	5456.77	323.362	22531.7	7475.43	14801.8	10333	12131.9	7285.78	2871.15	Filtered	Filtered	Filtered	Filtered	2461.65	Filtered	Filtered	Filtered	Filtered	Filtered	Filtered	Filtered	Filtered	251.385	Filtered	Filtered	Filtered	Filtered	Filtered	Filtered	1978.46	6016.91
P35998	26S protease regulatory subunit 7	6401.5	7861.71	11254.5	10787	7880.56	5006.17	1147.59	1748.86	9361.84	5639.85	7534.11	9248.74	9283.75	6990.24	8869.64	26981.4	6516.63	7431.98	13531.7	43312.6	15089.4	11310.4	7893.79	6285.33	23237.6	Filtered	10987.4	23828.1	19192.5	10438.9	4382.69	6997.76
P36405	ADP-ribosylation factor-like protein 3	18898.4	23123	11454	18669.7	15526.6	15388.4	33760.1	32136.5	13809	21995.6	18351.1	29441.4	11545.7	11135.8	31570.2	45922	20707.1	18025.8	24370.9	26580.9	24011	35264	6390.71	10467	19463.7	10798.7	18263.7	36704.5	39627	29981	14056.9	21711.6
P36543	V-type proton ATPase subunit E 1	13699	11807.7	14753	35906.4	21752.5	12497.5	19346.3	23944	16272.9	25236.1	27889.7	21744.5	26847.6	19898	82756.1	35299	21426	37193	25604	28641.7	21727.6	20048.9	27116.4	18348.7	14059.6	Filtered	16327.2	Filtered	29485.1	15087.8	15480.3	23737.5
P36578	60S ribosomal protein L4	8952.56	7752.61	10448.2	9110.25	8513.88	5969.83	4488.15	Filtered	9210.41	10097.7	13321.5	9232.17	11566.8	9686.58	15778.8	12793.8	1694.02	6636.01	20511.9	40997.4	18716.3	15942.7	18719.1	14443.7	27915.6	56042.7	11896.3	Filtered	7470.83	16022.5	4539.71	6474.77
P36871	Phosphoglucomutase-1	21474.5	22574.5	19263.5	25307.6	23242.8	22020.8	38495	25261	19615.4	25834.5	29207.9	18271.3	32974.6	27599.5	40701	53912.3	38023.4	35317.4	31571.6	24846.6	35269.2	31996.9	29267.5	19795	16259.4	21195.2	30128.9	26051.8	31754.8	23505.3	20865	26323.7
P36915	Guanine nucleotide-binding protein-like 1	7903.9	7235.22	5957.17	9487.94	5780.93	3198.39	Filtered	15697.5	6324.66	7893.83	8416	12773.7	2936.54	3641.27	Filtered	Filtered	3749.75	370.617	3381.19	Filtered	Filtered	Filtered	5082.31	6010.53	405.227	Filtered	Filtered	Filtered	Filtered	1448.69	3030.11	3398.87
P36952	Serpin B5	40398.9	64553.6	40012.8	76501.9	24026.9	27174.3	32219	31232.9	31588.2	25414.4	37322.2	44433.5	25606.8	25920.3	58377.5	54349.3	58864.4	70788.8	59408.7	63838	48594.5	58371.4	52825.2	39126.6	64828.2	49841.1	63082.9	71521.7	47992.2	46497.1	77867.9	52096.4
P36955	Pigment epithelium-derived factor	33823.4	30955.3	11074.5	33144.5	33388.4	37145	66174.9	69287.8	29233.4	41545.2	37679.4	11811	27571	23754.5	53106.9	58468.2	68830.1	38574.7	14492.3	47442.9	37328.1	60489.9	64985.2	55447.6	57740.1	258083	51388.7	216580	67582	38462.8	33723.9	22249.5
P36969	Phospholipid hydroperoxide glutathione peroxidase, mitochondrial	4135.14	3164.52	3450	6289.28	4246.52	3881.71	1005.02	3667.14	3357.18	3564.73	3689.15	3500.31	1962.34	3648.82	3619.36	Filtered	8444.45	2446.67	4422.95	Filtered	Filtered	3800	5521.04	3105.72	Filtered	3338.32	4522.58	Filtered	6058.49	1281.33	5189.37	3784.98
P36980	Complement factor H-related protein 2	1914.82	8245.34	2289.2	5070.46	5691.32	14291.5	5961.81	7033.17	9445.87	11563.5	2565.3	3633.14	7164.41	1017.47	Filtered	Filtered	7730.57	3444.01	Filtered	Filtered	13854.7	19486.6	1301.54	1739.93	Filtered	26560.6	Filtered	Filtered	Filtered	3223.46	8261.94	3967.94
P37802	Transgelin-2	97186.9	165442	109029	217295	132185	135573	207698	166833	153376	137054	181303	167798	208479	163658	245867	290883	160146	173302	213519	288692	181910	161846	132489	138331	165612	228516	193128	302035	156479	128463	144311	219414
P37837	Transaldolase	95816.7	129720	93669.8	101242	87774.6	104221	85756.4	69341.9	78362.8	100362	96651.4	132800	86537.1	98422.7	93762.8	65884	124716	145741	126095	147455	94527.6	87690.6	102106	101114	228753	259965	105391	61314.7	128527	105750	116341	71622.2
P38159	RNA-binding motif protein, X chromosome	15032.6	11002.8	7802.61	3344.51	12967.1	5972.98	11537.9	14784.8	5344.52	10445.9	7556.24	8918.75	7874.65	7656.76	Filtered	Filtered	12205.3	9436.84	9778.85	17026.6	9843.7	6700.41	13738.8	12508.9	28785.3	Filtered	13918.2	Filtered	15024.1	15060.4	15105.5	8135.1
P38571	Lysosomal acid lipase/cholesteryl ester hydrolase	Filtered	Filtered	517.443	Filtered	Filtered	612.899	Filtered	Filtered	589.659	1129.63	Filtered	Filtered	Filtered	Filtered	Filtered	Filtered	1399.96	1303.03	601.807	2756.64	1502.49	Filtered	Filtered	Filtered	3779.35	11826.2	2068.93	9315.13	1923.48	1951.97	3232.82	521.004
P38606	V-type proton ATPase catalytic subunit A	9748.85	15477.6	15828.9	24048.8	16068.8	14799.4	33992.1	26151.1	15163.6	12154.1	26256.3	23750.3	18823	22372.3	27610.8	27745.1	28942.8	31104	27439.6	21279.5	19329.9	24550.5	15645.1	14801.4	17803.2	18345.9	22046.1	36632.8	23398.5	25541.7	17803.6	26001.1
P38646	Stress-70 protein, mitochondrial	8567.08	8926.35	15763.6	Filtered	12312.1	9446.86	14834.1	18750.8	10719.1	6100.31	4414.49	7495.34	10934.8	17233.4	Filtered	Filtered	6636.76	13733.8	10889.9	29627.2	9723.28	Filtered	11218.6	19822.5	21800.2	Filtered	11346.7	40301.9	19193.3	23943.2	27387.8	3915.22
P39019	40S ribosomal protein S19	3330.85	Filtered	6003.55	4498.01	Filtered	Filtered	Filtered	Filtered	Filtered	5543.92	4316.21	4459.57	7800.97	Filtered	Filtered	Filtered	3782.93	Filtered	17783.3	Filtered	19866.4	36722.8	4288.6	Filtered	Filtered	Filtered	Filtered	Filtered	Filtered	Filtered	Filtered	15411.8
P39023	60S ribosomal protein L3	2695.88	2374.1	11023.9	Filtered	4010.74	7579.85	Filtered	Filtered	3181.74	5015.52	Filtered	8884.41	8036.16	7350.35	Filtered	Filtered	Filtered	Filtered	23546.1	Filtered	12100.5	Filtered	19345.4	10299.6	63815.1	Filtered	Filtered	Filtered	Filtered	Filtered	20074.2	Filtered
P39687	Acidic leucine-rich nuclear phosphoprotein 32 family member A	5374.49	8003.14	6794.83	7936.55	21104.4	10250	6490.44	Filtered	8471.32	7540.71	16952.5	9271.14	9461.79	11671.3	Filtered	Filtered	4844.61	21568.5	17066.4	Filtered	Filtered	Filtered	12029.6	15327.7	36183.3	Filtered	6700.73	Filtered	Filtered	11626.9	7682.67	Filtered
P40121	Macrophage-capping protein	73372.3	80347.4	62634.8	105983	81193	87823.3	148701	151662	81490.1	101399	77444.3	119081	84019	81309	154819	169425	162065	149727	105201	110652	87255.7	89528.7	72779.9	89172.6	84037.7	59214.2	94395.8	221175	111013	99721.6	71236.4	82893.7
P40227	T-complex protein 1 subunit zeta	14168.2	14429.9	12477.1	19357.8	16150.4	14969.1	18570.9	19997.1	16390.6	17705.2	17987	14151.5	13656.3	13407.7	19475	23113.7	16029.2	24950.2	17653.6	15238.7	17696.2	38616972	14673.3	7403.74	11923.8	Filtered	15090.8	23858.3	13908.1	14410.6	10136.3	15080
P40306	Proteasome subunit beta type-10	18146.9	19322.7	11138.5	11752.3	16246.8	15561.2	16945.4	24472.9	12448.1	20489.6	16904.6	14201.6	29268.3	23999.8	38666.3	29980.9	13293.6	13105.8	15242.9	25744.9	29502.6	37878.2	15497.2	17906.1	15311.2	Filtered	30069.2	65258.4	13205.5	13055.8	16491.2	17818.9
P40394	Alcohol dehydrogenase class 4 mu/sigma chain	140408	154680	186803	232183	116683	122605	445010	382681	169461	171274	142513	95097.7	144919	143299	165480	93730.9	185222	330108	302113	147435	240024	338409	143988	55180.1	145914	161259	149143	176252	283163	318053	409227	226956
P40429;Q6NVV1	60S ribosomal protein L13a;Putative 60S ribosomal protein L13a-like MGC87657	Filtered	3856.42	6897.45	6317.95	13399.9	7551.09	Filtered	Filtered	13553	15570.5	3874.19	6613.88	5544.62	7201.46	Filtered	Filtered	Filtered	738.435	11601.7	Filtered	9148.93	Filtered	9717.27	12675.4	18066.4	Filtered	Filtered	Filtered	Filtered	17337.7	Filtered	Filtered
P40763	Signal transducer and activator of transcription 3	2798.74	2253.4	3526.61	7963.36	3280.24	Filtered	1338.07	Filtered	2221.26	3623.06	6847.69	3077.26	12111.7	9853.23	4734.55	Filtered	2059.35	2415.85	2543.43	Filtered	4680.32	28144.7	10661.2	14057.5	1291.08	Filtered	22075.7	Filtered	4862.24	2441.79	6942.92	9020.19
P40925	Malate dehydrogenase, cytoplasmic	236433	302778	222107	312608	284993	286602	481301	439115	259687	348756	384792	400605	298253	291741	553507	493738	395995	404456	493234	478847	480574	463231	284592	294911	271072	259434	344484	456957	339481	336463	365045	385313
P40926	Malate dehydrogenase, mitochondrial	38637.3	43236.2	65936	14044	63147.6	49564.8	101771	113201	44481.5	58340	43840.3	36459.3	84568.1	89038.3	23543.2	17057.8	120945	129232	62101.5	76358.6	78777.3	54613.9	88351.9	124320	149036	169818	113506	51507	141853	151429	198588	73642.3
P41091	Eukaryotic translation initiation factor 2 subunit 3	2650.73	5959.17	1827.21	Filtered	6760.79	4886.86	10268.2	Filtered	7930.08	9530.89	10011.2	7101.76	10005.7	5156.19	Filtered	Filtered	7143.07	7985.66	9884.02	Filtered	12482.5	Filtered	9436.38	6795.93	14793.3	Filtered	7056.65	Filtered	Filtered	2353.08	5342.03	7891.78
P41218	Myeloid cell nuclear differentiation antigen	2454.33	3773.87	Filtered	Filtered	7542.82	9195.57	Filtered	Filtered	2277.09	1416.46	13502	Filtered	2558.08	5224.38	Filtered	Filtered	19358.5	28994.8	Filtered	Filtered	Filtered	Filtered	4985.61	9734.23	Filtered	Filtered	Filtered	Filtered	Filtered	Filtered	28661.5	Filtered
P41226	Ubiquitin-like modifier-activating enzyme 7	4158.59	6197.04	8053.55	11781.5	3200.88	5698.21	12878.1	9891.46	8121.62	8900.36	8193.63	6017.65	11493.7	12048	16962.6	20016.4	5626.75	8362.76	6308.83	7486.09	8200.91	Filtered	7471.54	11400.6	2078.5	Filtered	16349.6	18041.8	12085.6	8971.29	8582.09	15246.8
P41240	Tyrosine-protein kinase CSK	5061.16	2943.22	6726.2	6195.21	5256.47	9712.59	4903.59	10398.9	3365.03	5117.71	11102.8	6334.06	11895.6	12635.7	15950	Filtered	9365.7	8143.26	6047.08	Filtered	Filtered	Filtered	13130.5	11751.1	5726.92	Filtered	13702.9	Filtered	8779.39	10499	8912.7	3273.34
P41250	Glycine--tRNA ligase	3624.04	7809.32	4285.43	10200.9	4528.22	2953.95	7437.53	Filtered	3531.76	16028.1	4089.77	4052.41	1469.07	5899.99	Filtered	Filtered	409.503	56247.3	1056.02	Filtered	1118.1	Filtered	1268.86	9667.79	Filtered	Filtered	2220.5	Filtered	Filtered	13337	11338.5	Filtered
P41252	Isoleucine--tRNA ligase, cytoplasmic	5476.13	6592.63	3158.21	3607.6	6222.52	4924.75	Filtered	Filtered	5262.82	10173.1	6990.7	3002.76	3212.71	2147.66	Filtered	Filtered	2063.24	4672.01	4201.5	Filtered	Filtered	Filtered	4386.13	7861.58	Filtered	Filtered	4152.88	Filtered	2271.05	7809.01	1380.87	4563.57
P41743	Protein kinase C iota type	3224.87	694.893	2654.28	705.356	1695.81	342.902	6940.55	Filtered	2821.88	4749.5	1976.77	3037.44	Filtered	3075.5	4990.18	Filtered	3780.06	6474.28	3071.57	Filtered	Filtered	Filtered	1938.81	1600.5	Filtered	Filtered	Filtered	Filtered	2564.72	3611.59	3294.27	3989.24
P42025	Beta-centractin	11534.1	8221.82	7623.52	9569.34	4549.79	9609.4	Filtered	10637.8	11042.2	8564.62	11741.3	9472.91	2217.7	4548.15	Filtered	13425.1	14236.6	3009.79	6645.81	Filtered	Filtered	Filtered	Filtered	11776.6	8937.89	Filtered	2273.73	Filtered	Filtered	2112.42	13988	6542.63
P42166;P42167	Lamina-associated polypeptide 2, isoform alpha;Lamina-associated polypeptide 2, isoforms beta/gamma	5415.32	1792.95	4660.27	Filtered	8853.43	Filtered	Filtered	Filtered	5879.4	5521.86	9274.56	7768.05	9968.12	8503.45	Filtered	Filtered	7512.7	12287.5	10642.9	Filtered	Filtered	Filtered	6880.15	11874	8632.53	Filtered	Filtered	Filtered	Filtered	4353.47	3046.94	Filtered
P42224	Signal transducer and activator of transcription 1-alpha/beta	14992.8	13521.4	14129.1	10626.7	21380.8	14237.2	9335.61	Filtered	13551.6	14060.7	22504.4	13695.1	169465	137238	33879.9	35857.8	13254.8	14329.4	8703.54	Filtered	23431.6	34990.9	71136.7	108706	4029.02	Filtered	124365	95864	16735.4	29154.4	38600.5	76791.1
P42229;P51692	Signal transducer and activator of transcription 5A;Signal transducer and activator of transcription 5B	Filtered	Filtered	656.811	Filtered	1698.77	3189.08	Filtered	Filtered	1139.11	Filtered	Filtered	1517.12	5503.68	2782.99	Filtered	Filtered	Filtered	Filtered	Filtered	Filtered	Filtered	Filtered	Filtered	1377.61	Filtered	Filtered	Filtered	Filtered	Filtered	Filtered	Filtered	Filtered
P42330	Aldo-keto reductase family 1 member C3	5833.15	5714.41	1601.17	Filtered	4708.15	627.216	3872.63	Filtered	1959.89	3835.47	11879	2321.29	2966.61	1985.9	16942.4	9538.68	5734.6	3231.19	2294.68	Filtered	Filtered	Filtered	3371.26	Filtered	6392.65	Filtered	Filtered	Filtered	Filtered	3676.96	3688.67	Filtered
P42574	Caspase-3	9978.71	14934.4	15550.5	25256	9192.94	7960.5	19421	15934.6	12387.4	7802.78	8988.97	15228.5	4638.84	5627.44	15044.2	29269.4	12143.5	17718.4	12480.7	Filtered	20850.7	Filtered	3787.91	2992.4	14116.2	Filtered	18017.1	Filtered	6562.11	21589.9	11011.7	25145.9
P42677	40S ribosomal protein S27	3320.59	Filtered	10115.9	Filtered	Filtered	Filtered	Filtered	Filtered	Filtered	Filtered	Filtered	12230.5	7441.87	Filtered	Filtered	Filtered	Filtered	Filtered	Filtered	Filtered	Filtered	Filtered	Filtered	9392.72	Filtered	Filtered	Filtered	Filtered	Filtered	11515.8	Filtered	Filtered
P42766	60S ribosomal protein L35	2907.66	Filtered	4053.15	Filtered	Filtered	Filtered	Filtered	Filtered	Filtered	846.254	Filtered	3013.01	Filtered	Filtered	Filtered	Filtered	Filtered	Filtered	7168.81	Filtered	Filtered	Filtered	Filtered	Filtered	Filtered	Filtered	Filtered	Filtered	Filtered	Filtered	Filtered	Filtered
P42858	Huntingtin	Filtered	Filtered	1113.09	Filtered	525.015	Filtered	Filtered	Filtered	633.102	Filtered	Filtered	Filtered	Filtered	Filtered	Filtered	Filtered	Filtered	Filtered	Filtered	Filtered	Filtered	Filtered	Filtered	7558	Filtered	Filtered	Filtered	Filtered	Filtered	Filtered	Filtered	Filtered
P43034	Platelet-activating factor acetylhydrolase IB subunit alpha	6979.69	8820.31	6954.68	14032.2	8304.66	8726.78	12568.6	9533.95	7299.21	7975.4	5955.55	9377.23	9490.33	7177.13	17417.3	11439.6	11786.6	8078.61	7802.84	10669.5	13768.2	15427.3	7179.32	4482.26	4091.07	Filtered	4930.91	Filtered	7159.46	6630.36	7108.45	9169.98
P43251	Biotinidase	11674.8	10457.3	4610.25	25775.8	11716.6	10409.3	27292.1	20646.2	7721.63	8104.1	25467.7	8523.75	6055.98	5523.03	12908.2	32994.4	9662.13	5392.5	7438.4	20787.8	12752.3	27096.6	4774.44	9768.8	26772.4	36359.1	6886.26	15411.4	31768.5	17087.6	6687.58	8190.19
P43487	Ran-specific GTPase-activating protein	10774.4	12991.3	7430.08	8388.62	12811.3	10219.9	15190.1	18326.4	11705.9	13873.8	11580.8	14539.5	18809.3	14638.4	22088.7	19482.3	11013.7	10468.3	13032.9	Filtered	15826.6	Filtered	16206.5	9626.39	9777.58	Filtered	17420.5	20997.5	13681.3	16047.5	10496	22398.6
P43490	Nicotinamide phosphoribosyltransferase	27135.5	46108.6	49645.5	76091.2	53835.5	49231.9	52759.1	65694.2	46907.8	59268.4	44330.4	50342.9	67318.1	64274.1	21084.3	29364.2	63804.3	77385.2	49403.4	44194.5	36465.4	30117.9	46774	46272.9	20086	35464.2	41691.1	62148.7	85835.1	64747	107430	83927.5
P43652	Afamin	40045.3	25403.5	8942.37	9589.76	24605.5	43447.3	38040	35636.8	22953.2	18066.8	14025.7	14354.5	15355.9	17399	22276.5	19341	21525.7	14627	7224.64	16292	17653.5	40388.3	47201.5	41073.9	74063.9	192387	25549.9	62832.4	22033.3	12492.4	26022.6	13205.2
P43686	26S protease regulatory subunit 6B	12567.4	42188.8	8560.38	15193.1	23359.5	17118.9	8048.14	Filtered	11702.2	10294.5	28582.8	14392.6	8990.3	5156.26	27107.6	11660.7	5913.11	7429.64	12923.6	19454.5	Filtered	Filtered	8282.09	12688.3	12026	Filtered	10256.5	31603.6	36467.6	10561.1	6669	10012.4
P45877	Peptidyl-prolyl cis-trans isomerase C	Filtered	Filtered	2849.04	Filtered	1469.69	Filtered	18261.3	14711.8	2473.31	6289.29	13111.1	12474.4	848.137	Filtered	34559.9	28532.6	2841.71	2654.43	12585.2	50838.9	15742.8	23722.8	Filtered	Filtered	24936.3	82502.6	15261.4	78494.2	30823.1	11220.7	Filtered	10105
P45954	Short/branched chain specific acyl-CoA dehydrogenase, mitochondrial	Filtered	Filtered	Filtered	Filtered	Filtered	Filtered	Filtered	Filtered	Filtered	1371.36	Filtered	132.798	462.539	1454.69	Filtered	Filtered	Filtered	869.637	Filtered	Filtered	Filtered	Filtered	419.094	1274.36	1486.33	Filtered	Filtered	Filtered	Filtered	Filtered	2174.63	Filtered
P45974	Ubiquitin carboxyl-terminal hydrolase 5	32720.2	30777.5	24158.1	37258.1	36415.1	31899.4	37913.2	40819.2	22321.9	32845.7	33354.1	33281.6	39794.7	40052.3	45934.4	42130.9	31528.9	31179.8	28166.2	47667.6	35026.2	35913.9	29078.9	25329.6	29484.3	22600.8	39738.4	36779.4	35412.1	38063.4	31480.9	34744.3
P45984;P53779	Mitogen-activated protein kinase 9;Mitogen-activated protein kinase 10	2138.62	1972.89	1146.01	Filtered	1521.59	1429.64	2734.26	Filtered	1021.16	2105.76	1656.34	2203.99	1075.16	1918.03	Filtered	2592.62	2099.19	1930.57	1275.03	Filtered	1838.56	Filtered	1522.5	1142.99	818.969	Filtered	Filtered	Filtered	1741.3	1311.77	2342.69	1666.22
P45985	Dual specificity mitogen-activated protein kinase kinase 4	Filtered	Filtered	1533.79	Filtered	Filtered	Filtered	Filtered	Filtered	Filtered	Filtered	Filtered	Filtered	3259.14	2029.29	Filtered	Filtered	Filtered	Filtered	1356.15	Filtered	Filtered	Filtered	1169.34	1059.89	Filtered	Filtered	Filtered	Filtered	Filtered	3811.62	980.654	Filtered
P46108	Adapter molecule crk	9373.75	12212.9	12242.1	13876.2	7761.61	10386.1	17164.2	21970.4	6377.65	7122.35	7676.65	11967.3	13913.8	11088.3	14280.6	16505.6	13307.6	13646.5	13244.1	24132.3	14945.4	8805.25	14120.7	12611.8	4210.38	Filtered	13992	Filtered	15085.5	9781.03	25905	17282.1
P46109	Crk-like protein	1152.78	3654.9	1108.96	2763.26	2451.23	2113.92	2956.2	Filtered	1661.25	2289.22	1489.48	1540.15	2629.48	1690.81	Filtered	Filtered	2697.26	1570.8	1299.48	2898.77	2518.53	Filtered	922.668	1065.77	1605.99	Filtered	Filtered	Filtered	2229.38	1627.27	3595.23	1612.99
P46379	Large proline-rich protein BAG6	4191.94	3559.18	4518.9	6607.72	2007.87	Filtered	Filtered	Filtered	2208.42	3206.65	3851.95	2157.76	2393.1	1790.75	Filtered	4355.95	Filtered	2759.94	3620.73	3341.71	Filtered	Filtered	Filtered	1680.71	1420.34	Filtered	Filtered	Filtered	Filtered	2269.66	1158.23	2095.16
P46459	Vesicle-fusing ATPase	30968	35333	30402.3	40445.7	22123.3	24005.5	30304.4	33415.9	32898.7	33387.3	27499.9	38023.8	24018.8	29111.5	41973.1	34669.6	18331.1	26003	48687.8	41272	42531	39538.9	24331.1	16533.7	16975.5	68871.6	29133.6	53743.6	28458.4	28959.9	17153.4	39120.2
P46734	Dual specificity mitogen-activated protein kinase kinase 3	3153.01	Filtered	1898.31	Filtered	Filtered	Filtered	Filtered	Filtered	Filtered	Filtered	2226.71	2255.67	Filtered	Filtered	Filtered	Filtered	Filtered	Filtered	Filtered	Filtered	Filtered	Filtered	Filtered	Filtered	Filtered	Filtered	Filtered	Filtered	Filtered	1151.77	2749.61	Filtered
P46776	60S ribosomal protein L27a	8603.79	9063.39	18914.8	34457.6	14742.6	Filtered	Filtered	Filtered	32400.7	37305.1	20253.8	24932	11330.9	13961	Filtered	45246.6	Filtered	11421.5	29596.8	Filtered	Filtered	Filtered	9802.73	8847.39	90683.1	Filtered	Filtered	Filtered	Filtered	40210	5789.05	20734.1
P46777	60S ribosomal protein L5	10659	14857.8	12348.9	6738.88	14164.6	14148.4	13928.6	Filtered	6515.08	11932.2	10405.9	15875.1	16641.3	24255.7	14432.3	Filtered	14296.3	13266.6	29493	15050.8	16523.1	Filtered	29900.9	25911.9	23280	Filtered	22486.4	Filtered	9674.33	16419	18634.8	12335.3
P46778	60S ribosomal protein L21	Filtered	1313.41	5759.69	Filtered	6395.56	6611.79	Filtered	Filtered	10738.1	Filtered	7844.56	9814.58	9671.01	7230.07	Filtered	Filtered	Filtered	Filtered	7779.23	Filtered	Filtered	Filtered	Filtered	15532.5	Filtered	Filtered	Filtered	Filtered	Filtered	Filtered	Filtered	Filtered
P46779	60S ribosomal protein L28	5618.04	3513.18	5349.98	Filtered	3629.91	4916.44	Filtered	Filtered	5995.59	4851.83	Filtered	4222.38	4940.32	Filtered	Filtered	Filtered	Filtered	1844.84	11950	Filtered	Filtered	Filtered	9998.32	10642.3	13432.8	Filtered	3855.11	Filtered	Filtered	6837.44	Filtered	Filtered
P46781	40S ribosomal protein S9	15530.8	16182.4	25380.3	7527.8	15817.1	29107.1	11285.1	5887.07	15612.7	23032.4	16825	22645	25617.8	22606.3	19681.6	18275.2	13816.6	21145.8	29147.9	20742.8	28071.8	21057.1	30548.7	29348	19158.9	Filtered	38283.7	Filtered	14938.9	17300.5	13146.3	14420
P46782	40S ribosomal protein S5	11641.6	10173.6	10839.3	6302.93	7736.85	9252.33	Filtered	Filtered	9969.1	17177.4	8899.57	3731.4	8338.94	8768.4	5076.42	Filtered	1466.8	10082.3	13960.8	Filtered	14032.4	Filtered	16753.8	19182.8	18331.3	Filtered	3129.71	Filtered	9180.49	9332.47	8874.83	9817.97
P46783	40S ribosomal protein S10	8167.95	6426.49	4135.18	Filtered	9028.24	7909.97	4748.89	6878.84	2800.11	8797.89	4845.86	9328.18	11206.9	8429.6	3329.16	4668.81	5773.26	8770	5196.2	7070.21	17580.6	19188.4	17918	9427.2	8798.21	Filtered	23688.8	Filtered	7705.59	7047.82	11866.5	6515.5
P46926	Glucosamine-6-phosphate isomerase 1	16473.8	22642.4	23985	38162.8	19309.6	20929.1	41046.1	33443.4	20898.5	18671.5	32249.7	19662.6	35082.8	32421.2	37967.2	30614.5	28712.1	33837.6	49271.5	41217.6	41622	50301.8	15000.2	21499.4	26624.5	47471.1	35818.5	31015.5	26458.3	33312.2	18492	35047.3
P46940	Ras GTPase-activating-like protein IQGAP1	55373.4	78103.7	63279	74751.5	48906.3	45809.3	51817.1	57713.3	64818.7	47086.7	71222.3	53909.5	35705.4	43732.4	63632.9	54191.8	58028.5	63220.6	91972.4	73505.3	87463.3	72704.2	64260.8	49037.5	65879.3	47353.4	72558	57401.8	62654.8	76585.1	56432.4	33136.5
P46976	Glycogenin-1	12096.3	10447.8	11300.3	17566.9	10271.8	15216.7	25436.5	45543.7	11143.3	16669.4	24649.6	14333.7	22862.9	20593.6	25789.4	28728.5	30019	25932.1	27081.6	46558.5	41923.9	57612	16613.3	18284.6	14657.1	Filtered	26247	51938.1	22388.4	17251.9	17575.7	18542.4
P47755	F-actin-capping protein subunit alpha-2	46002.1	60567.9	55337.8	97916.9	71385.9	54082.1	79385.1	3.35236e+06	59166.4	57950.6	60774.2	52333.4	56440.4	61365.7	79200.1	84116.2	60474.4	76024.3	56506.6	71091.2	54384	644042	51690.7	54177.4	47439.7	109585	47139.5	108672	71909.5	62696.9	52096.5	54282
P47756	F-actin-capping protein subunit beta	50501	66458.6	55822.1	83986.6	47491.6	60521.2	66215.1	47480.1	55777.2	58048.4	79454.6	50847.9	67356.6	62049.5	89486.2	86695.6	72197.9	74840.8	97108.1	99793.8	102102	79565.9	60749.7	63349.1	79633.7	51435.2	66954	99976.2	73092.4	62713.5	60055.7	46874.6
P47895	Aldehyde dehydrogenase family 1 member A3	89459.1	209853	106256	190128	145560	147800	220308	200171	174949	150429	270036	250467	157214	125045	380241	462502	260988	214511	236789	333321	199888	208076	131793	130645	129597	20497.5	143301	189097	152423	153511	137815	249263
P47897	Glutamine--tRNA ligase	8241.36	8559.7	6888.33	7178.88	9856.04	6434.44	6528.93	9589.38	9173.09	8966.42	11646.6	9208.91	8251.18	9921.78	8143.76	4682.5	5291.24	5920.63	9041.41	11256.7	14798.1	6340.03	11081.9	8450.2	16379.6	Filtered	11380.9	Filtered	11459.1	13756.6	5071.78	6251.09
P47914	60S ribosomal protein L29	16336.5	19331.2	19528.4	14294.7	11201.2	19443.4	Filtered	Filtered	10460.8	18945.6	Filtered	13656.6	13161	10133.8	21417.5	17578.6	6494.57	Filtered	34689.4	Filtered	24005.6	29616.6	15163.7	19960.5	42462	Filtered	26409.3	Filtered	12161.1	25108.6	10729.2	7181.1
P47929	Galectin-7	5033.71	19466.5	8481.94	72596.8	Filtered	Filtered	Filtered	13982.6	Filtered	Filtered	Filtered	4834.31	8337.87	4606.6	Filtered	Filtered	11775.7	24038.9	Filtered	Filtered	Filtered	Filtered	5260.7	12605.9	Filtered	Filtered	Filtered	Filtered	Filtered	6534.26	7441.32	6658.01
P47989	Xanthine dehydrogenase/oxidase	6260.73	8895.64	38904.8	56052.5	8455.72	6428.88	22889.3	20152.7	6363.96	7635.43	11238.2	10231.2	23879.7	20546.8	13454.6	4296.14	11923	20825.3	27237.9	Filtered	21890.9	28826.1	13594.1	9862.04	3506.54	Filtered	5787.31	Filtered	42890	41118.5	33169.7	35208
P48147	Prolyl endopeptidase	23205.9	32756.3	24036.2	37937.8	27500.9	25150.1	31543.6	29540.6	34992.5	34621.7	29800	48178.2	22599.8	25529.4	35245.6	38227.2	32084.5	37111.3	28679.8	40628	41873.1	34591.2	30142.7	23360.6	14035.5	Filtered	34200.3	17441.4	29736.2	29287.3	28558.9	40905.4
P48444	Coatomer subunit delta	20027.1	18755	25675.6	17966.6	20562.8	12075.7	24555.3	20194.6	19700.7	22145.6	17565.1	19052.5	16832.7	14724.4	10185.9	12935.9	20495.2	20074.8	22987.9	18092.2	18345	Filtered	20204.3	15591	27960.8	Filtered	18711.9	14666.8	25299.3	29409.3	32195.7	18118.7
P48506	Glutamate--cysteine ligase catalytic subunit	2899.06	2706.21	3438.29	5755.81	4477.98	2198.4	7293.3	Filtered	3341.54	3640.42	4261.86	3214.1	4963.07	4081.75	Filtered	Filtered	4587.93	2081.08	2391.66	Filtered	Filtered	Filtered	6051.91	2447.19	Filtered	Filtered	2810.8	Filtered	2533.32	3044.04	2383.01	4981.78
P48556	26S proteasome non-ATPase regulatory subunit 8	3220.91	3885.95	13997.6	9397.75	7607.34	7219.04	Filtered	Filtered	9546.88	10550.8	8078.27	9657.7	9480.15	6361.83	84615.7	43358.5	Filtered	6943.24	20238.6	Filtered	5421.95	Filtered	8557.12	Filtered	Filtered	Filtered	8206.05	Filtered	Filtered	Filtered	10837.4	5154.63
P48595	Serpin B10	Filtered	Filtered	Filtered	Filtered	Filtered	Filtered	Filtered	Filtered	Filtered	Filtered	Filtered	Filtered	Filtered	Filtered	Filtered	Filtered	3843.1	4655.4	Filtered	Filtered	Filtered	Filtered	Filtered	Filtered	Filtered	Filtered	Filtered	Filtered	Filtered	Filtered	Filtered	Filtered
P48637	Glutathione synthetase	14213.1	18431.4	13853.6	24770.3	13077.7	18696.4	25271.2	32684.2	14973.2	23971.9	11752.8	22754.9	21220.7	19235.5	22616.9	41316.2	19022.1	23490.4	21372.2	31556.8	20148.2	22812.7	9360.13	8833.5	8848.49	Filtered	8736.81	26220.1	21678.4	14003.7	19040.1	22737.5
P48643	T-complex protein 1 subunit epsilon	16301.1	19324.7	13511.8	25124.6	15273.7	19339.8	16985.4	9655.89	17650.2	16510.8	25145.7	18462.4	17943	15626.4	19665.9	26514.6	17384.5	17892.5	22316.2	26361.3	24658.8	275572	17676.1	16306	17260.9	Filtered	29770.2	24650.3	14928.2	16846.9	12616.6	22580.9
P48723	Heat shock 70 kDa protein 13	3795.03	3282.14	1523.49	13420.3	6397.95	4036.14	7485.73	12948.2	1720.23	2864.5	12050.3	3928.93	1914.93	2226.48	36489.1	20431.6	7894.08	4788.63	4173.39	28469.4	7709.81	22984.5	7843.23	2149.47	755.12	34342.8	12030.2	58458.7	12859.7	7625.95	2706.01	8433.34
P48735	Isocitrate dehydrogenase [NADP], mitochondrial	794.597	8902.92	1687.75	Filtered	16110.8	14551.2	Filtered	Filtered	2270.07	6271.7	Filtered	16040.6	4489.03	5159.94	128726	166492	6683.82	4367.96	6350.24	Filtered	82481.4	150661	21150.6	7821.42	40973.4	436784	2868.53	Filtered	3699.36	15547	7814.3	5613.26
P48739	Phosphatidylinositol transfer protein beta isoform	3679.2	5196.17	4861.58	5018.98	5007.35	790.214	5588.89	4948.23	25312.8	3198.95	6242.18	5000.14	4968.97	5128.2	Filtered	Filtered	64789.1	3931.37	4084.57	Filtered	10926.7	Filtered	Filtered	2225.56	762.472	Filtered	5106.83	Filtered	Filtered	8681.85	11508.8	3563.5
P49189	4-trimethylaminobutyraldehyde dehydrogenase	40965.2	55211.9	43932.4	59236.1	53575.4	36155.8	49387.5	41736.5	53467.4	55788.2	43828.8	66489.5	59247	35187.4	101406	126464	59883.8	66658.8	81092.4	58750.4	101537	152209	42157.1	30511.9	62112.2	66167.7	57811.5	66357.6	68339.3	54437.7	37227.3	42661.9
P49247	Ribose-5-phosphate isomerase	5710.23	6586.11	2541.65	Filtered	5355.75	Filtered	Filtered	Filtered	Filtered	4866.87	2985.45	12751.9	2882.8	2493.75	Filtered	Filtered	Filtered	1488.66	3083.61	Filtered	Filtered	Filtered	Filtered	Filtered	Filtered	Filtered	Filtered	Filtered	Filtered	Filtered	1779.5	Filtered
P49257	Protein ERGIC-53	3222.68	6248.36	4548.13	10783.9	2968.04	3809.77	22791.8	30635.7	4109.73	6712.78	9048.22	3066.27	5585.88	1807.46	11514.4	14031	8676.04	5713.23	6402.2	66889.4	12728.8	41834.2	1839.77	Filtered	12764.7	93542.5	10715.6	72111.1	24159.6	9684.58	2241.79	9930.68
P49327	Fatty acid synthase	5549.81	5595.76	8032.45	8250.45	5326.04	4394.94	5724.36	Filtered	5455.63	6417.32	6966.41	6292.76	5608.92	3224.12	4420.75	7777.84	7216.87	10845.5	9156.57	9078.81	5788.76	4032.04	6087.6	6507.83	3884.44	Filtered	3902.83	13523.7	5089.7	6915.8	2717.55	2615.14
P49354	Protein farnesyltransferase/geranylgeranyltransferase type-1 subunit alpha	3342.49	5981.23	3183.48	5514.69	3609.65	3569.79	5404.46	12616.3	3886.45	4147.31	3734.5	5309.64	4142.41	5492.81	11922.5	2562.88	6918.97	2977.25	2911.85	Filtered	1743.16	5861.05	3382.85	3806.85	Filtered	Filtered	5715.2	Filtered	2330.95	4808.92	2824.85	2615.81
P49368	T-complex protein 1 subunit gamma	36446.7	41160.4	28311.6	52044.9	32184.2	34482.9	38874.2	37094.4	37361.3	35584.6	46828	34243.5	32921.2	26002.6	51737.4	50168.5	34903.8	36685.7	44230	47787.2	46441	33044.8	34862.2	29061.6	33756.1	25044.7	52906.7	74406.8	37509.7	32816.6	21449.8	39080.2
P49407	Beta-arrestin-1	Filtered	5155.74	1712.19	6830.85	7425.52	6287.93	19478.6	14995.1	7336.52	12453.7	7744.56	9442.95	8308.01	9005.41	1918.06	Filtered	2858	7207.52	5393.99	Filtered	13564.7	Filtered	Filtered	2361.66	Filtered	Filtered	12088.7	Filtered	Filtered	6205.99	Filtered	Filtered
P49411	Elongation factor Tu, mitochondrial	2389.95	3760.14	7647.84	Filtered	4782.73	4935.75	Filtered	Filtered	5818.05	84391	4372.15	7042.26	8579.36	6686.19	Filtered	Filtered	21853.5	24045.5	9898.42	Filtered	8863.67	48153.8	8353.13	11606.3	18984.4	21421.4	16642.7	Filtered	9250.65	17497.6	5231.01	6591.33
P49419	Alpha-aminoadipic semialdehyde dehydrogenase	14622.7	18318.9	21223	23603.1	18387.9	18482.9	29640.1	27655	22050.4	20421	20615.4	24217.7	17093.6	18815.5	35113.5	31762.1	19312.6	18551.9	42797.4	40121.4	36554.2	41896.2	13705.7	11678.7	18819.8	30319.8	23122.7	67767.4	27755	27534.1	19594	18790.9
P49441	Inositol polyphosphate 1-phosphatase	7275.19	11381	2079.95	6828.59	3163.38	2996.61	7519.44	9669.71	1767.1	2198.97	1878.02	3599.76	9351.83	16271.7	3757.48	Filtered	3104.59	2180.76	2549.93	3161.78	4628.9	Filtered	1544.04	9436.49	Filtered	Filtered	Filtered	Filtered	Filtered	2765.06	3576.1	4355.3
P49588	Alanine--tRNA ligase, cytoplasmic	3681.18	5638.71	2407.53	3140.82	3674.03	3424.11	7544.31	Filtered	5523.43	4742	10087.4	3987.48	3715.14	4067.64	5369.64	6353	4648.41	2274.38	2567.49	4815.61	5486.51	Filtered	2133.51	5190.4	Filtered	Filtered	4258.39	Filtered	Filtered	5055.29	4117.87	3069.04
P49589	Cysteine--tRNA ligase, cytoplasmic	3461.01	5306.49	4539.06	17193.5	7545.2	13526.6	11188.3	9376.69	10248.3	22191.7	5003.77	6603.32	9034.88	10987.1	13989.5	17755.2	14513.2	10821.9	5953.05	Filtered	12584.7	Filtered	9260.47	17843	11989.8	15807.9	15970	18249.7	10820.7	9034.99	9478.04	6310.56
P49591	Serine--tRNA ligase, cytoplasmic	9833.53	7622.53	9058.41	12888.1	7564.25	5673.97	10643.3	5176.52	5243.55	6874.48	11694	12457.1	13136	12478.9	20537	13316	10532	13166.4	14767.1	21429.7	11318.1	Filtered	12197	16133.5	3095.67	Filtered	10198.5	39078.9	7997.42	9938.76	9548	15151.4
P49720	Proteasome subunit beta type-3	8484.26	10405.1	7762.75	8088.83	10307.5	4439.71	12597	5947.6	8522.13	9120.75	12429.4	9690.36	10820	9288.79	8715.74	13558	7309.29	13007.8	9282.42	13042	15376.2	10687.7	12036.1	11851.1	9448.47	Filtered	15312.6	6283.57	9202.07	12999.3	17096.2	19089.7
P49721	Proteasome subunit beta type-2	13263.1	10463.2	7729.77	5616.24	6544.31	8003.58	Filtered	Filtered	4195.77	7421.27	13025.2	12777	6171.22	8033.15	Filtered	8249.5	26118.7	11922.3	7095.32	16495.3	Filtered	Filtered	22386.8	12311.1	Filtered	Filtered	24537	Filtered	15222.6	8378.62	21137.5	7512.17
P49748	Very long-chain specific acyl-CoA dehydrogenase, mitochondrial	Filtered	Filtered	5501.93	Filtered	1441.41	Filtered	1666.87	Filtered	2027.29	861.973	Filtered	1365.19	Filtered	3812.47	Filtered	Filtered	2118.37	2851.58	2090.65	Filtered	Filtered	Filtered	3933.54	2280.43	2704.62	Filtered	3917.26	Filtered	7290.17	6133.03	1614.72	Filtered
P49773	Histidine triad nucleotide-binding protein 1	12157.2	15355.8	8098.85	12929.6	18982.9	23633.4	21648.2	19004.5	19206.5	19811.6	41778.3	17640	15254.9	11130	22727.7	24701.7	11919.8	17066.3	16886.1	37581	39207	21918.8	11997.5	11781.7	11747.5	Filtered	5347.65	27271.3	21147.4	13674.4	19300.4	29994.8
P49788	Retinoic acid receptor responder protein 1	41270	51971	89402.3	413768	152722	125388	230231	179458	27640.4	39144.4	43719.2	87437.3	188474	125360	523225	444446	169749	120435	55258.3	420056	79872.7	146481	85527.1	80166.5	170395	553225	140261	604272	298482	459073	24412.7	40941.7
P49789	Bis(5'-adenosyl)-triphosphatase	1131.24	Filtered	151.427	3006.57	Filtered	Filtered	Filtered	Filtered	Filtered	1506.48	Filtered	Filtered	1280.92	1083.74	Filtered	Filtered	Filtered	Filtered	Filtered	Filtered	Filtered	Filtered	Filtered	Filtered	Filtered	Filtered	Filtered	Filtered	Filtered	Filtered	Filtered	Filtered
P49840	Glycogen synthase kinase-3 alpha	648.28	831.753	Filtered	Filtered	Filtered	Filtered	Filtered	Filtered	Filtered	Filtered	Filtered	Filtered	Filtered	Filtered	Filtered	Filtered	Filtered	Filtered	Filtered	Filtered	Filtered	Filtered	Filtered	Filtered	Filtered	Filtered	Filtered	Filtered	Filtered	Filtered	Filtered	Filtered
P49862	Kallikrein-7	Filtered	Filtered	5822.96	1563.21	Filtered	Filtered	Filtered	11297.8	13111	Filtered	4349.52	Filtered	7505.09	Filtered	4368.74	Filtered	Filtered	Filtered	Filtered	Filtered	Filtered	Filtered	Filtered	Filtered	20208.9	Filtered	Filtered	Filtered	Filtered	1425.51	7203.54	45379.9
P49902	Cytosolic purine 5'-nucleotidase	5847.09	7761.44	6000.77	7789.28	10826.9	12233.5	12151.1	1771.86	9279.94	6452.65	10124.9	10090.3	14127.2	11915.8	19459	7913.53	7522.34	12865	10562.9	1713.16	11198.3	Filtered	7895.46	7729.7	7550.61	Filtered	11991.5	Filtered	1823.63	11457.9	8880.96	7238.23
P49903	Selenide, water dikinase 1	958.972	572.823	260.143	Filtered	242.882	444.741	Filtered	Filtered	Filtered	542.67	598.423	889.103	680.457	386.919	Filtered	Filtered	Filtered	Filtered	Filtered	4483.52	Filtered	Filtered	Filtered	Filtered	Filtered	Filtered	Filtered	Filtered	Filtered	Filtered	Filtered	Filtered
P49908	Selenoprotein P	5816.88	4414.74	Filtered	Filtered	5756.84	4574.7	22535.1	Filtered	1459.91	Filtered	Filtered	Filtered	12198.1	8819.67	Filtered	Filtered	Filtered	Filtered	Filtered	Filtered	Filtered	Filtered	13419.3	15131.7	Filtered	Filtered	Filtered	Filtered	10901.8	Filtered	Filtered	Filtered
P50213	Isocitrate dehydrogenase [NAD] subunit alpha, mitochondrial	Filtered	Filtered	Filtered	Filtered	Filtered	Filtered	Filtered	Filtered	286.049	Filtered	Filtered	Filtered	Filtered	694.193	Filtered	Filtered	Filtered	Filtered	1496.48	Filtered	Filtered	Filtered	Filtered	Filtered	Filtered	Filtered	Filtered	Filtered	Filtered	Filtered	476.668	Filtered
P50224	Sulfotransferase 1A3/1A4	7963.99	1934.41	3665.66	1983.64	6535.37	3961.99	Filtered	Filtered	6862.09	11805.9	10461.4	4137.14	13061.4	3974.48	21418.4	15084.4	10884.6	5993.55	2763.32	Filtered	Filtered	Filtered	4807.7	2030.92	Filtered	Filtered	13183.4	Filtered	Filtered	8479.87	5093.01	4205.88
P50225;P50226	Sulfotransferase 1A1;Sulfotransferase 1A2	3929.6	1995.07	2866.13	4438.91	3268.72	4455.57	Filtered	Filtered	1608.22	1011.25	7812.28	7378.54	6722.62	4934.88	11377.9	9594.44	7840.64	5591.32	Filtered	Filtered	Filtered	Filtered	4490.11	1546.8	Filtered	Filtered	5040.85	Filtered	5883.29	6171.31	1489.01	9482.66
P50238	Cysteine-rich protein 1	117625	167106	274513	309074	189865	161066	259757	208317	236120	240046	178117	299296	130287	101399	248191	327925	316063	367082	384114	193996	277898	327531	154753	128391	267910	95276.9	254867	289795	243463	313472	212725	234165
P50395	Rab GDP dissociation inhibitor beta	48485.8	72103.4	54507.4	102939	65427.9	49548.5	91048.9	72438.4	51404.4	69844	80692.8	82278.9	75250.3	48475.9	91558.5	83692.8	74353.4	68003.1	67387.4	60824.8	82210.2	81064.6	56795.1	68822.7	37983.7	51695.4	71058.3	33715.2	80852.1	82383.9	63369.4	58865.7
P50452	Serpin B8	22230.6	29742.3	25176.8	39089.8	26436.5	34704.7	21899.3	28764.8	33548.3	26379.4	47463.3	30155.3	28084.9	31664.8	109021	89526.7	41443.5	63385.3	25529.2	44643.4	104406	127007	103107	95123.1	38940.7	150511	93537.5	72352.7	40688.8	62806.9	35711.2	30015
P50454	Serpin H1	Filtered	Filtered	3222.38	Filtered	2010.37	Filtered	Filtered	Filtered	1815.09	Filtered	1903.32	880.857	4252.54	4709.68	Filtered	Filtered	Filtered	Filtered	Filtered	Filtered	Filtered	Filtered	4027.16	6637.77	Filtered	Filtered	Filtered	Filtered	Filtered	3237.43	6278.35	Filtered
P50502	Hsc70-interacting protein	30368	33881.4	21398.8	25441.1	9818.88	8893.56	11639.4	14897	18726.6	28539.8	9735.03	36717.1	17909.8	13464.2	12086.9	10013.1	13599.3	14513.9	19330.4	17280.8	46004.9	41417.7	7867.09	7104.38	7012.68	Filtered	20504	34953.5	23146.8	15586.7	14039.3	10555.2
P50552	Vasodilator-stimulated phosphoprotein	9716.55	2438.21	3702.54	6673.72	5054.91	7497.34	5698.99	6178.25	3949.8	3827.8	6810.67	3831.59	6325.7	5575.74	Filtered	1913.11	7855.67	7008.38	3775.18	5116.47	2168.92	Filtered	5740.65	3476.92	2965.19	Filtered	4443.12	Filtered	6987.39	2747.87	1954.52	2412.83
P50570	Dynamin-2	14452.8	17523.7	11975.8	7845.97	11903.9	7794.57	3330.66	135985	13188.9	16773.5	9839.47	15728.4	12871.2	15807.4	20739.5	14275.5	16819.2	16512.4	18979.3	56503.6	20123.9	Filtered	11428.5	13793	16255.3	304735	8376.53	Filtered	32392.8	16031.6	8125.86	10707.6
P50583	Bis(5'-nucleosyl)-tetraphosphatase [asymmetrical]	3701.42	7149.52	3930.02	10439.2	4685.89	5823	11691.3	Filtered	3560.12	4288.62	6314.04	7965.32	4169.88	1921.35	9160.7	Filtered	3368.39	1822.95	4257.89	Filtered	2575.27	Filtered	1634.3	652.82	Filtered	Filtered	Filtered	Filtered	Filtered	2077.01	Filtered	3909.2
P50591	Tumor necrosis factor ligand superfamily member 10	2856.43	2881.79	Filtered	10393.4	1602.48	Filtered	5948.63	Filtered	Filtered	4335.76	5001.89	1779.86	6532.57	4327.64	39643.5	37654.1	8813.33	Filtered	4030.76	15361.7	11201.5	Filtered	1544	4761.26	Filtered	Filtered	16738.1	Filtered	27035	6851.54	2938.95	7929.94
[truncated: 905 more rows]

## Sheet: Table S4
UniProtIds	ProteinDescriptions	FC	adjust p value	Function
[truncated: 51 more rows]
